# Supplementary material for: An interpretable 3D multi-hierarchical representation-based deep neural network for environmental, health and safety properties prediction of organic solvents
Source: Royal Society of Chemistry journal article supplement (doi:10.1039/d3gc04801b), 2024-01-01
Supplement: d3gc04801b1.xlsx [file d3gc04801b1.xlsx]

## Sheet: Supporting Cover
	An Interpretable 3D Multi-hierarchical Representation-based Deep Neural Network for Environmental, Health and Safety Properties Prediction of Organic Solvents
	Jun Zhanga, Qin Wangb,*, Yang Leic, and Weifeng Shena,*
	aSchool of Chemistry and Chemical Engineering, Chongqing University, Chongqing 400044, China
	bSchool of Chemistry and Chemical Engineering, Chongqing University of Science and Technology, Chongqing 401331, China
	cSchool of Chemistry and Chemical Engineering, Hubei Key Laboratory of Coal Conversion and New Carbon Materials, Wuhan University of Science and Technology, Wuhan 430081, Hubei, China
	*Corresponding author: E-mail: wangq356@mail2.sysu.edu.cn (Qin Wang), and shenweifeng@cqu.edu.cn (Weifeng Shen)
	Total number of tables:4 (Table S1, S2, S3, S4 and S5)

## Sheet: Table of contents
	Table of contents ( Tables S1, S2, S3, S4 and S5)
	Table S1. Lipophilicity dataset including canonical SMILES for model development.
	Table S2. Rat oral LD50 dataset including canonical SMILES for model development.
	Table S3. Falshpoint dataset including canonical SMILES for model development.
	Table S4. The details of the distribution of the prediction results.
	Table S5. The optimized hyperparameters of all variants of the 3D-MrDNN.

## Sheet: Table S1
Table S1. Lipophilicity dataset including canonical SMILES for model development.
Index No.	Canonical SMILES	lipo
1	Cn1c(CN2CCN(c3ccc(Cl)cc3)CC2)nc2ccccc21	3.54
2	COc1cc(OC)c(S(=O)(=O)N2c3ccccc3CCC2C)cc1NC(=O)CSCC(=O)O	-1.18
3	COC(=O)[C@H](c1ccccc1Cl)N1CCc2sccc2C1	3.69
4	O=C(NC1Cc2ccccc2N(C[C@@H](O)CO)C1=O)c1cc2cc(Cl)sc2[nH]1	3.37
5	Cc1cccc(C[C@H](NC(=O)c2cc(C(C)(C)C)nn2C)C(=O)NCC#N)c1	3.1
6	COc1ccc(-c2coc3cc(OC)cc(OC)c3c2=O)cc1	3.05
7	Cc1cc(Nc2nc(N[C@@H](C)c3ccc(F)cn3)c(C#N)nc2C)n[nH]1	2.61
8	O=C1CCCCCN1	-0.08
9	CCCSc1ncccc1C(=O)N1CCCC1c1ccncc1	1.95
10	Cc1ccc(S(=O)(=O)Nc2c(C(=O)NC3CCCCC3C)cnn2-c2ccccc2)cc1	1.34
11	Nc1ccc(-c2nc3ccc(O)cc3s2)cc1	3.2
12	COc1ccc(N2CCN(C(=O)[C@@H]3CCCC[C@H]3C(=O)NCC#N)CC2)cc1	1.6
13	CCC(COC(=O)c1cc(OC)c(OC)c(OC)c1)(c1ccccc1)N(C)C	3.77
14	COc1cc(-n2nnc3cc(-c4ccc(Cl)cc4)sc3c2=O)ccc1N1CC[C@@H](O)C1	3.15
15	CO[C@H]1CN(CCn2c(=O)ccc3ccc(C#N)cc32)CC[C@H]1NCc1ccc2c(n1)NC(=O)CO2	0.32
16	CC(C)(CCCCCOCCc1ccccc1)NCCc1ccc(O)c2nc(O)sc12	2.92
17	O=C(Nc1nnc(C(=O)Nc2ccc(N3CCOCC3)cc2)o1)c1ccc(Cl)cc1	1.92
18	COc1ccc(Oc2cccc(CN3CCCC(n4cc(C)c(=O)[nH]c4=O)C3)c2)cc1	3.17
19	O=C(O)c1cccc(N2CCC(CN3CCC(Oc4ccc(Cl)c(Cl)c4)CC3)CC2)c1	2.17
20	CNCC[C@@H](Oc1ccccc1C)c1ccccc1	1.2
21	COc1cnc(-c2ccccn2)nc1N(C)C	1.9
22	CSc1c(C(=O)NC2C3CC4CC(C3)CC2C4)cnn1-c1ccc(C(=O)O)cc1	1.2
23	CS(=O)(=O)C1(c2cc(N3CC4CCC(C3)O4)nc(-c3cccc4[nH]ccc34)n2)CC1	2.6
24	CS(=O)(=O)c1ccccc1C(=O)NC[C@@H](O)CN1CCC(Oc2ccc(Cl)c(Cl)c2)CC1	2.34
25	N#Cc1ccccc1Oc1ccc(C(=O)NCc2ccncc2)cc1	2.57
26	CN(C)c1ccnc2sc(C(=O)NCc3ccccc3)c(N)c12	3.62
27	Cc1ccc(NC(=O)c2cscn2)cc1-n1cnc2ccc(N3CCN(C)CC3)cc2c1=O	2.06
28	Cn1cncc1-c1c2c(=O)n(CC3CC3)c(=O)n(CC3CC3)c2nn1Cc1ccnc2ccc(Cl)cc12	4.33
29	COc1ccc2ncc(C#N)c(CCN3CCC(NCc4cc5c(cn4)OCS5)CC3)c2c1	2.55
30	O=C1Nc2ccccc2B(O)N1c1ccccc1	1.4
31	CC(C)N(CCC(C(N)=O)(c1ccccc1)c1ccccn1)C(C)C	-0.54
32	CCS(=O)(=O)c1ccc(-c2cc(C(F)(F)F)ccc2O[C@H](C)C(=O)O)c(C)c1	-0.4
33	N#Cc1ccc(F)c(-c2cc(C(F)(F)F)ccc2OCC(=O)O)c1	-0.16
34	COc1ccc(-c2cc3c(C)nc(N)nc3n([C@H]3CC[C@H](OCCO)CC3)c2=O)cn1	2.2
35	CC(Nc1ncnc2ccccc12)c1ccccc1	3.4
36	CC(C)c1ccc2oc3nc(N)c(C(=O)O)cc3c(=O)c2c1	1.1
37	O=c1[nH]c2c(O)ccc([C@@H](O)CNCCCOCCOCCc3cccc4ccccc34)c2s1	2.28
38	O=C(O)c1ccc(NC(=O)c2cc(OCc3ccccc3F)cc(OCc3ccccc3F)c2)nc1	3
39	O=C(O)CCC[C@@H]1c2ccccc2C[C@H]1NC(=O)c1cc2cc(F)ccc2[nH]1	1.95
40	CCNC(=O)c1cc2c(-n3ccc(C(F)(F)F)n3)c(-c3cncc(C(=O)O)c3)cnc2[nH]1	-0.99
41	Cc1ccc(S(=O)(=O)Nc2c(C(=O)N[C@@H](C)C(C)(C)C)c(C)nn2C2CCCC2)cc1	2
42	c1ccc(Nc2cc(Nc3ccccc3)[nH]n2)cc1	3.8
43	CCC(CC)NC(=O)c1cnn(C)c1NS(=O)(=O)c1ccc(C)cc1	0.36
44	N#Cc1c(-c2ccccc2)nc(SCCc2ccccc2)[nH]c1=O	1.71
45	O=C(OC1CN2CCC1CC2)C(O)(c1ccccc1)c1ccccc1	1.19
46	Cc1ccccc1NC(=O)CCS(=O)(=O)c1ccc(Br)s1	2.7
47	Cc1ncc(-c2nc(Nc3ccc(C(=O)N(C)C)cc3)ncc2F)n1C(C)C	2.77
48	COc1cccc(-c2c[nH]c(-c3ccccc3)n2)c1	3.8
49	O=C(COc1ccccc1)c1ccccc1	2.87
50	COc1cc2ncc(C(N)=O)c(Nc3ccc(F)cc3F)c2cc1NCCN(C)C	1.91
51	CO[C@H]1CC[C@]2(CC1)Cc1ccc(OCC(C)C)cc1C21N=C(C)C(N)=N1	3.4
52	COc1cc2ncnc(Nc3ccc(F)c(Cl)c3)c2cc1OCCCN1CCCC1	3.13
53	O=C1CCOc2cc(COc3ccccc3)ccc21	3
54	Clc1cccc2cn[nH]c12	2.33
55	CNC(=O)c1ccc(CC(=O)N(C)C2CCN(Cc3ccc(C(F)(F)F)cc3)CC2)cc1	2.8
56	COCCNCc1ccc(CCNC[C@H](O)c2ccc(O)c3[nH]c(=O)sc23)cc1	-0.54
57	C#CCn1c(=O)c2c(-c3cncn3C)n(Cc3ccnc4ccc(Cl)cc34)nc2n(CC2CC2)c1=O	3.16
58	C[C@H](NC(=O)c1cccnc1Oc1ccccc1)c1ccccc1	2.91
59	O=C(NCC12CC3CC(CC(C3)C1)C2)c1cc(CN2CC3CNCC(C2)O3)ccc1Cl	1.55
60	COc1cc(NS(=O)(=O)c2ccc(N)cc2)nc(OC)n1	0.2
61	C[C@H](Nc1ncc(F)c(Nc2cc(C3CC3)[nH]n2)n1)c1ncc(F)cn1	2.47
62	CC(=O)Nc1ccc2c(c1)c(-c1cc(NC3CC3)n3ncc(C#N)c3n1)cn2CCCO	2.48
63	CC1COc2c(N3CCN(C)CC3)c(F)cc3c(=O)c(C(=O)O)cn1c23	-0.45
64	CC1(c2nc(N3CCOCC3)ncc2C(=O)NC2C3CC4CC2CC(O)(C4)C3)CC1	2
65	COC(=O)c1ccc(C)c(NS(=O)(=O)c2ccc3c(c2)c(=O)sn3C)c1	2.6
66	COc1ccc(-c2coc3cc(O)cc(O)c3c2=O)cc1	3.5
67	CNCCCC12CCC(c3ccccc31)c1ccccc12	0.89
68	Oc1cc(-c2ccccc2)nc2ccnn12	1.3
69	O=CN1CC=C(c2c(F)cc(N3C[C@H](COc4ccon4)OC3=O)cc2F)CC1	2.01
70	C#CC(C)n1c(=O)c2c(-c3cncn3C)n(Cc3ccnc4ccc(Cl)cc34)nc2n(CC2CC2)c1=O	3.59
71	C[C@H]1CN(Cc2cc(Cl)ccc2OCC(=O)O)CCN1C(=O)Cc1ccccc1	0.18
72	Cc1nc(C)c(-c2ccc([C@H]3CC[C@H](CC(=O)O)CC3)c(F)c2)nc1C(N)=O	1.3
73	COc1ccnc(CCc2nc3c(C)ccnc3[nH]2)c1	2.1
74	Cc1cc(CCCOc2c(Cl)cc(C3=NCCO3)cc2Cl)on1	3.72
75	CN(C)C(=O)c1ccc(CN2CCc3cc4nc(N)sc4cc3CC2)cc1	1.72
76	COC(=O)[C@H]1[C@@H](O)CC[C@H]2CN3CCc4c([nH]c5ccccc45)[C@@H]3C[C@@H]21	1.65
77	CCN1CCN(c2ccc(Nc3cc(N(C)C(=O)Nc4c(Cl)c(OC)cc(OC)c4Cl)ncn3)cc2)CC1	3.7
78	CC(C)N(CCCNC(=O)Nc1ccc(C(C)(C)C)cc1)C[C@H]1O[C@@H](n2cnc3c(N)ncnc32)[C@H](O)[C@@H]1O	2.2
79	COc1ccc(Cc2c(N)n[nH]c2N)cc1	0.2
80	Cc1cn([C@H]2CCCN(S(=O)(=O)c3ccc(O)c(Oc4ccccc4)c3)C2)c(=O)[nH]c1=O	1.49
81	c1ccc(N2CC3COc4ccccc4C3=N2)cc1	4.28
82	CNC(=C[N+](=O)[O-])NCCSCc1ccc(CN(C)C)o1	-0.95
83	CC(C)CC(c1ccncc1)n1[nH]c(=O)c2nc3cc(Cl)ccc3c(O)c2c1=O	1.64
84	FC(F)c1nc2ccccc2[nH]1	2.02
85	N#Cc1cccc(OC[C@@H](O)CNC2CCN(Cc3ccc(Cl)c(Cl)c3)CC2)c1	3.09
86	COc1cc2ncc(C(N)=O)c(Nc3ccc(F)cc3F)c2cc1N1CCN(C)CC1	2.18
87	O=C(Oc1ccccc1O)c1cccc2ccccc12	4.4
88	COc1ccccc1CNc1cc(C)ccn1	3.28
89	Nc1nc(Nc2cccc(Br)c2)c2nc[nH]c2n1	3.04
90	Nc1c2c(nc3ccc(Br)cc13)N(c1ccccc1)CC2	3.12
91	COc1cc(OC)c(S(=O)(=O)N(c2ccc(C)cc2)c2ccc(C)cc2)cc1NC(=O)CCC(=O)O	0.06
92	O=C(c1ccc(F)cc1)C(O)c1ccc(F)cc1	2.49
93	Cc1ccc(NC(=O)c2cccc(OCC(C)C)c2)cc1C(=O)Nc1cccnc1	2.81
94	COc1ccc(OC)c(CNC(=O)c2cccnc2Oc2ccccc2)c1	3.52
95	NC1(c2ccc(-c3nc4ccn5c(=O)[nH]nc5c4cc3-c3ccccc3)cc2)CCC1	2.5
96	O=C1COc2ccc(CNC3CCN(CCN4C(=O)COc5ccc(Cl)cc54)CC3)nc2N1	1.33
97	O=C(O)Cc1ccc(N2CCC(CN3CCC(Oc4ccc(Cl)c(Cl)c4)CC3)CC2)cc1	1.83
98	COc1cc2ncc(C(N)=O)c(Nc3cccc(Cl)c3F)c2cc1OC	3.6
99	N=C(N)NC(=O)c1nc(Cl)c(NCc2ccccn2)nc1N	-0.56
100	NC1(C(=O)NCc2ccc(Cl)cc2)CCN(c2ncnc3[nH]ccc23)CC1	2.88
101	Cc1ncc(-c2ccc([C@H]3CC[C@H](CC(=O)O)CC3)cc2)nc1C(N)=O	1
102	Cn1ncnc1COc1nn2c(-c3cc(F)ccc3F)nnc2cc1C(C)(C)C	2.4
103	CNCC[C@H](Oc1ccc(C(F)(F)F)cc1)c1ccccc1	1.89
104	Cc1ccc(S(=O)(=O)NC(=O)N2CCC(N3CCC(Oc4ccc(Cl)cc4Cl)CC3)CC2)cc1	1.52
105	O=[N+]([O-])c1ccc2c(c1)N(c1cccc[n+]1[O-])CC(C(F)F)(C(F)F)O2	3.2
106	CC(C)NCC(O)COc1ccc(COCCOC(C)C)cc1	0.1
107	Nc1nnc(CCSCCc2nnc(NC(=O)Cc3ccccc3)s2)s1	2
108	COc1ccc(-c2cc(=O)c3ccccc3[nH]2)cc1	2.71
109	Cn1cc(C#N)cc1-c1c2c(=O)n(C)c(=O)n(CC3CC3)c2nn1Cc1ccnc2ccc(Cl)cc12	3.67
110	Cc1ccc(-c2nccn2C)cc1NC(=O)c1ccc(OCc2ccccn2)cc1	2.83
111	CC(=O)Nc1ccc(C(=O)Nc2ccccc2N)cc1	0.82
112	O=c1cc(N2CCOCC2)oc2cc(O)ccc12	1
113	Oc1nc(-c2ccc(C(F)(F)F)cc2)nc2c1CSCC2	3.07
114	O=c1c2ccc(O)cc2ncn1-c1ccc(O)cc1	1.6
115	O=c1[nH]c2c(O)ccc([C@@H](O)CNCCc3ccccc3CNCCc3ccccc3F)c2s1	1.58
116	Clc1ccccc1-c1cnn[nH]1	2.68
117	NC(=O)c1ccc(Oc2cccc3cccnc23)c([N+](=O)[O-])c1	1.7
118	NC(=O)Nc1cc(-c2cccc(O)c2)sc1C(N)=O	2.21
119	COC(=O)c1nc2c(N[C@H](C)CO)nc(SCc3cccc(F)c3F)nc2[nH]c1=O	2.49
120	Cc1nc(Cl)c(Cl)n1Cc1sc2c(c1C(=O)N1CC[C@@H](O)C1)c(=O)n(C)c(=O)n2CC(C)C	1.61
121	N#Cc1cnc(N2CCN(C(=O)[C@@H]3CCCC[C@H]3C(=O)NC3(C#N)CC3)CC2)s1	1.2
122	Cc1ccc(NC(=N)N)cc1C	-1.34
123	O=C(NCC1CCCCC1)c1cc(-n2ncc(=O)[nH]c2=O)ccc1Cl	1.26
124	FC(F)(F)c1nnc2ccc(N3CCCCC3)nn12	3
125	Cc1c(Sc2ccc(Cl)cc2)c2c(NS(C)(=O)=O)cccc2n1CC(=O)O	0.21
126	CCCNC(=O)CSc1ccc(S(=O)(=O)N2CCCC2)cn1	1.55
127	C[C@@H](Oc1cccc2ncnc(Nc3ccc4c(cnn4Cc4ccccn4)c3)c12)C(=O)N1CCOCC1	2.82
128	COc1ccc(Cn2cc3c(=O)n(C)c(=O)n(CC(C)C)c3c2)cc1	3.52
129	COc1cc2c(Nc3ccc(Cl)cc3F)ncnc2cc1OCCn1cncn1	3.2
130	Cc1ccc2c(c1)c(-c1ccnc3ccc(C(F)(F)F)cc13)c(C)n2CC(=O)O	1.78
131	CSc1ncccc1C(=O)Nc1nccs1	1.43
132	CCOc1ncc(C)c2c1[C@H](c1ccc(C#N)cc1OC)C(C(N)=O)=C(C)N2	2.51
133	Cc1nc2ccc(Cl)cn2c1-c1ccnc(N)n1	2.49
134	CC1CC(OC(=O)C(O)c2ccccc2)CC(C)(C)C1	2.31
135	NC1(c2ccc(-c3ncc4ccncc4c3-c3ccccc3)cc2)CCC1	2.2
136	CC(C)C(NC(=O)Cn1c(-c2ccccc2)ccc(NS(C)(=O)=O)c1=O)C(=O)C(F)(F)F	1.77
137	C[C@H]1CN(C(=O)c2ccc(C#N)cc2)[C@H](C)CN1C(=O)[C@@](C)(O)C(F)(F)F	1.5
138	CCOc1ccccc1-c1ccc(-c2nc3ccc(F)cc3c(N[C@H](C)C(=O)O)c2C#N)cc1	2.5
139	CC[C@H](NC(=O)c1c(S(C)(=O)=O)c(-c2ccccc2)nc2ccccc12)c1ccccc1	3.17
140	O=C(Nc1ccc(F)cc1)c1cccnc1Oc1ccccc1	3.19
141	Cc1ccc(C(=O)C(C)CN2CCCCC2)cc1	1.65
142	Cc1nc(S(C)(=O)=O)ccc1Nc1ncnc(OC2CCN(C(=O)OC(C)C)CC2)c1C	2.8
143	Cc1ccccc1-c1c(C(=O)O)n(CCCOc2cccc3ccccc23)c2ccccc12	3.89
144	C[C@@H](NCc1ccccc1-c1ccc(CCNC[C@H](O)c2ccc(O)c3[nH]c(=O)sc23)cc1)c1ccccc1	2.28
145	Nc1nc(Nc2ccc(F)c(Cl)c2)c2nc[nH]c2n1	2.75
146	Cc1ccc(-c2cccc([S@]3(=O)=NC(=O)[C@H](C)N3)c2)cc1	1.6
147	Nc1nc(N)nc(-c2cccc(C(F)(F)F)c2)n1	2.4
148	O=C(NS(=O)(=O)c1ccc(F)cc1)N1CCC(N2CCC(Oc3ccc(Cl)c(Cl)c3)CC2)CC1	1.79
149	O=C(O)COc1ccc(Cl)cc1CN1CCCN(S(=O)(=O)Cc2ccccc2)CC1	1.01
150	Clc1cccc(-n2nnnc2NCc2ccccc2Oc2ccccn2)c1Cl	3.62
151	O=C(NCCc1ccccc1Cl)c1cc(-n2ncc(=O)[nH]c2=O)ccc1Cl	1.29
152	O=c1[nH]n(Cc2ccccn2)c(=O)c2c(=O)c3ccc(Cl)cc3[nH]c12	1.1
153	C[C@@H](NC(=O)[C@H]1CCCCN1)c1ccc(Nc2ncc3cc(-c4ccncc4)ccc3n2)cc1	2.15
154	CC(C)Cn1c(=O)n(C)c(=O)c2c(C(=O)N3CC[C@@H](O)C3)c(Cc3cccc4ncccc34)sc21	1.98
155	CC(C)C(NC(=O)Cn1c(-c2ccccc2)ccc(NS(N)(=O)=O)c1=O)C(=O)C(F)(F)F	1.17
156	O=C(NCC1CCCCCC1)c1cc(-c2cccnc2N2CCC(C(=O)O)CC2)ccc1Cl	2.53
157	N=C(NCc1ccc(Cl)cc1)SCCCc1c[nH]cn1	1.13
158	Cc1ccc(-c2cccc(-c3nn[nH]n3)c2)cc1	1.3
159	Cc1ccc2c(n1)c(Sc1ccc(Cl)cc1)c(C)n2CC(=O)O	0.35
160	Cc1ccc(NC(=O)c2ccnc(N3CCOCC3)c2)cc1Nc1ccnc(N(C)C2CCN(C)CC2)n1	1.8
161	CN[C@@H](C)C(=O)N[C@H](C(=O)N[C@H]1CCN(C(=O)c2ccccc2)C1)C1CCCCC1	0.82
162	Cc1cnc(-c2ccc(C)c(NC(=O)c3ccc(OCc4ccccn4)cc3)c2)[nH]1	3.19
163	O=C(NCCSCc1ccccc1)c1ccccc1	3.3
164	CC(C)Cn1c(=O)n(C)c(=O)c2c(C(=O)N3CC[C@@H](O)C3)c(Cc3c[nH]c4ccccc34)sc21	2.35
165	Cc1cc(Nc2nc(N[C@@H](C)c3ccc(F)cn3)cnc2C)n[nH]1	1.73
166	c1ccc(-c2ccc(COc3ccc4c(c3)CCC(CCN3CCCCC3)C4)cc2)cc1	3.3
167	CC(Cc1cccc(CNCCc2c(Cl)cccc2Cl)c1)NC[C@H](O)c1ccc(O)c2[nH]c(=O)sc12	2.41
168	OCC[C@]1(c2ccc(Cl)c(Cl)c2)CCCNC1	0.61
169	COc1ccccc1C(C#N)NC(=O)[C@@H]1CCCC[C@H]1C(=O)N1CCN(Cc2ccc(F)cc2)CC1	3.57
170	CN(C)c1nc(N[C@H]2CC[C@@H](NC(=O)c3ccc(F)c(F)c3)CC2)nc2ccccc12	3.13
171	CCCNC[C@@H](O)COc1ccccc1C(=O)CCc1ccccc1	1.56
172	O=c1[nH]n(C(c2ccncc2)C2CC2)c(=O)c2c(O)c3ccc(Cl)cc3nc12	0.7
173	Cc1cc(OC2CCN(CC3CCN([C@@](C)(Cc4ccc(F)cc4)C(=O)O)CC3)CC2)ccc1Cl	2.08
174	O=C(CCc1ccccc1)c1ccccc1	3.77
175	CCCCc1ncc(/C=C(\Cc2cccs2)C(=O)O)n1Cc1ccc(C(=O)O)cc1	-0.9
176	C1CCC(C(CC2CCCCN2)C2CCCCC2)CC1	3.02
177	COc1cc(Nc2nccc(N(C)c3cc(CO)ccc3C)n2)cc(N2CCOCC2)c1	3.9
178	O=C(Nc1nc2c(=O)[nH]cnc2s1)c1ccccc1	1.94
179	CC[C@H](NC(=O)c1c([S+](C)[O-])c(-c2ccc(F)cc2)nc2ccccc12)c1ccccc1	3.72
180	COc1ccc2nc(N[C@H]3CCC[C@H](NCc4ccsc4)C3)ccc2c1	2.43
181	O=C(COc1ccccc1)N1CCOCC1	0.75
182	Cc1nnsc1C(=O)Nc1ccccc1	0.97
183	CC[C@H](C)C(=O)O[C@H]1C[C@@H](C)C=C2C=C[C@H](C)[C@H](CC[C@@H](O)C[C@@H](O)CC(=O)O)[C@H]21	1.07
184	Cc1cn([C@H]2CCCN(Cc3ccc(C(=O)O)c(Oc4cccc(C(F)(F)F)c4)c3)C2)c(=O)[nH]c1=O	-0.38
185	O=C(C1CCCCC1)N1CC(=O)N2CCc3ccccc3C2C1	2.43
186	Cc1ccccc1-n1c(Cn2nc(-c3ccc(O)c(F)c3)c3c(N)ncnc32)nc2cccc(C)c2c1=O	3.55
187	O=c1[nH]cnc2[nH]ncc12	-0.42
188	Cc1ccc(S(=O)(=O)Nc2c(C(=O)N[C@@H](C)C(C)(C)C)c(C)nn2C2CCOC2)cc1	0.78
189	O=c1ncn2nc(Sc3ccc(F)cc3F)ccc2c1-c1c(Cl)cccc1Cl	2.74
190	Cc1c(Sc2ccc(Cl)cc2)c2cc(Cl)ccc2n1C(C)C(=O)O	3.56
191	NC(=O)c1sc(-c2ccccc2)cc1N	2.33
192	Cc1ccc2c(c1)c(-c1ccnc3cc(Cl)ccc13)c(C)n2CC(=O)O	1.59
193	COc1ccc2ncc(F)c(CCN3CCC(NCc4cc5c(cn4)OCCO5)CC3)c2n1	1.46
194	CS(=O)(=O)c1ccc(-c2cnc(N)c(-c3ccc(C(F)(F)F)nc3)c2)cc1	2.4
195	O=C1CCOc2nc(CCc3ccccc3)ccc21	2.5
196	O=c1[nH]c2cc(Cl)ccc2o1	2.16
197	CC(C)C(=O)NCCNCC(O)COc1ccc(O)cc1	-0.15
198	NC1(c2ccc(-c3nn4cccc4cc3-c3ccccc3)cc2)CCC1	3.3
199	O=C(O)COc1ccc(C(F)(F)F)cc1CN1CCN(S(=O)(=O)c2ccccc2)CC1	0.4
200	CSCCC(NC(=O)c1sccc1Cl)c1nc2ccccc2[nH]1	3.69
201	O=C(Nc1nc2ccccc2n1CCN1CCOCC1)c1cccc([N+](=O)[O-])c1	3.3
202	CC(C)[C@@H](CO)NS(=O)(=O)c1ccc(Cl)s1	2.3
203	N#CC[C@H](C1CCCC1)n1cc(-c2ncnc3[nH]ccc23)cn1	2.55
204	O=S(=O)(Nc1nccs1)c1cc(Cl)ccc1Cl	1.14
205	Cc1cc(C(=O)Cn2cc(C(F)(F)F)ccc2=O)c(C)n1Cc1ccccc1	3.46
206	Oc1ccc2nc(-c3ccccc3)sc2c1	3.99
207	NS(=O)(=O)c1nc2ccccc2s1	1.35
208	OC[C@H]1C[C@@H](n2nnc3c(N[C@@H]4C[C@H]4c4ccc(F)c(F)c4)nc(SCCC(F)(F)F)nc32)[C@H](O)[C@@H]1O	3.99
209	NC(=O)c1ccccc1OCc1ccccc1	2.5
210	NC(=O)N1c2ccccc2CC(=O)c2ccccc21	1.28
211	Cc1ccc(F)cc1S(=O)(=O)N[C@@H]1CCN(Cc2ccc(-c3ccccc3)cc2)C1	4
212	CC(=O)Nc1ccc2c(c1)c(Sc1ccc(Cl)cc1)c(C)n2CC(=O)O	0.2
213	O=C1CCOc2nc(C#CC3CCCC3)ccc21	3
214	CN1CCN2c3ncccc3Cc3ccccc3C2C1	2.82
215	O=c1[nH]c2c(O)ccc([C@@H](O)CNCCSCCCNCCc3ccccc3)c2s1	0.12
216	CC(C)(C)NS(=O)(=O)c1cncc(-c2ccc3nc(NC(=O)NCC(=O)N4CCOCC4)nn3c2)c1	0.96
217	CC[C@H](NC(=O)c1c([S+]([O-])C(C)C)c(-c2ccccc2)nc2ccccc12)c1ccccc1	3.81
218	C[C@@]1(C(=O)Nc2ccc(F)nc2)CCCN1c1nc(Nc2cc(C3CC3)[nH]n2)c2cccn2n1	3.16
219	CC1CN(C(=O)c2ccccc2)c2ccccc2NC1=O	1.73
220	COc1cc2ncn(-c3cc(OCc4ccccc4C(F)(F)F)c(C(=O)O)s3)c2cc1OC	0.84
221	O=c1[nH]c2c(O)ccc([C@@H](O)CNCCCSCCNCCc3cccc(Cl)c3Cl)c2s1	1.74
222	NC(=O)Nc1cc(-c2cccc(F)c2F)sc1C(=O)N[C@H]1CCCNC1	1.32
223	CC(C)C(=O)Nc1nc(-c2ccccn2)cc2ccccc12	2.7
224	COc1ccc(C(=O)NCc2cn(-c3cc(C)nc4ccc(OC)cc34)nn2)cc1	3.5
225	O=S(=O)(CCCNCCc1ccc(O)c2nc(O)sc12)NCCOCCc1cccc(Cl)c1	1.92
226	CNC(=O)c1cc(-c2nc(N3CCOCC3)cc(C3(S(C)(=O)=O)CC3)n2)c2cc[nH]c2c1	1.7
227	O=c1ccc(=O)c2ccccc2[nH]1	1.02
228	CC[C@@H](Nc1c(Nc2cccc(C(=O)N(C)C)c2O)c(=O)c1=O)c1ccc(C)o1	2.32
229	Fc1ccc(CN2CCN(C3=Nn4c(nnc4C(F)(F)F)CC3)CC2)cc1	2.8
230	O=C(Nc1ccc(N2CCOCC2)cc1)c1nnc(NC(=O)C2(c3ccc(Cl)cc3)CCCC2)o1	3.72
231	CC[C@H](NC(=O)c1c(CN(C)C)c(-c2ccccc2)nc2ccccc12)c1ccccc1	4.18
232	CCOC(=O)Nc1cccc([C@@H](c2ccc(C(=O)N(C)CC)cc2)N2CCN(Cc3nc[nH]c3C)CC2)c1	2.32
233	Nc1nc(-c2ccccc2)cs1	2.43
234	COc1ccnc(CCc2nc3cc(Br)cnc3[nH]2)c1	2.92
235	Nc1nnc(-c2cccc(Cl)c2Cl)c(N)n1	1.38
236	COc1ccc(Cl)c(Nc2ncnc3cc(OCC4CCN(C)CC4)c(OC)cc23)c1	2
237	CS(=O)(=O)C1(c2cc(N3CCOCC3)nc(-c3cccc(N)c3)n2)CC1	1.35
238	Nc1ncc(-c2ccc(S(=O)(=O)N3CCOCC3)cc2)nc1C(=O)Nc1cccnc1	2.83
239	CS(=O)(=O)NCC(NC(=O)C1(N)CCN(c2ncnc3[nH]ccc23)CC1)c1ccc(Cl)cc1	2.1
240	CN1CCN(c2ccc(NC(=O)c3nnc(Nc4ccccc4F)o3)cn2)CC1	2.36
241	CC[C@H](NC(=O)c1c([S+](C)[O-])c(-c2ccccc2)nc2cc(Br)ccc12)c1ccccc1	3.18
242	COc1cc(N2CCN(C(C)=O)CC2)ccc1Nc1ncc(Cl)c(-c2cnc3c(F)cc(F)cn23)n1	3.2
243	NC1(C(=O)NC(c2ccc(Cl)cc2)C2CC2)CCN(c2ncnc3[nH]ccc23)CC1	3.4
244	O=C(NC[C@@H](O)CN1CCC(Oc2ccc(Cl)c(Cl)c2)CC1)c1n[nH]c2ccccc12	2.95
245	COc1cc(N2CCN(C)CC2)c2nc(C(=O)Nc3ccc(N4CCOCC4)cc3)cc(N(C)C)c2c1	3.3
246	Cc1nn(C2CCN(C)CC2)cc1-c1cnc(N)c(-c2nc3ccccc3o2)c1	3.4
247	CC(C)N1CCN(Cc2cnc(-c3cc(-c4cccc5[nH]ccc45)cc4[nH]ncc34)o2)CC1	3.49
248	CC(C)C(NC(=O)Cn1c(-c2ccccc2)ncc(NC(=O)OCC(F)(F)F)c1=O)C(=O)C(F)(F)F	2.37
249	COc1ccc2ncc(=O)n(CCN3CC[C@@H](NCc4cc5c(cn4)OCCO5)[C@@H](O)C3)c2c1	0.78
250	CCOc1cc2nccc(Oc3cnc(CC(=O)Nc4n[nH]c(CC)c4C)c(OC)c3)c2cc1OC	3.29
251	CCNc1nc(C#N)nc(Nc2ccccc2)n1	3.11
252	O=C1CCOc2nc(/C=C/c3ccccc3)ccc21	3.2
253	c1ccc(CNCCNCc2ccccc2)cc1	0.73
254	CNCC[C@@H](Oc1ccc(C(F)(F)F)cc1)c1ccccc1	1.96
255	Cc1cc(Oc2ccc3c(c2)OCO3)nc(Oc2ccc(-n3ccnc3)cc2)n1	3.47
256	CS(=O)(=O)Cc1cc(N2CCOCC2)nc(-c2cnc3[nH]ccc3c2)n1	1.92
257	COC(=O)CCCC(=O)Nc1ccc2c(c1)-c1ccccc1C(=O)C2=O	2.96
258	C[C@@H]1CN(c2noc(C3CC3)n2)CCN1c1ncc(OCc2ccncc2C#N)cn1	3.1
259	CCN(CC)S(=O)(=O)c1ccc(-c2nnc(SCC(=O)N3CCc4ccccc43)o2)cc1	3.9
260	O=C(O)C[C@@H]1c2ccccc2C[C@H]1NC(=O)c1cc2sc(Cl)c(Cl)c2[nH]1	2.53
261	CN1CCN(c2cc(F)cc3c(=O)cc(C(=O)Nc4ccc(N5CCOCC5)cc4)[nH]c23)CC1	2.7
262	CC(C)Oc1cc(OCCc2cccnc2)cc(C(=O)Nc2ccc(C(=O)O)cn2)c1	0.81
263	CCOC(=O)C1(c2cccc(O)c2)CCCN(CC2CC2)C1	1.89
264	O=C(Nc1nc2ccccc2n1CCCO)c1cccc([N+](=O)[O-])c1	3
265	CCC(CC)NC(=O)c1cnn(-c2ccccc2Cl)c1NS(=O)(=O)c1ccc(C)cc1	0.65
266	O=c1[nH]n(Cc2ccsc2)c(=O)c2c(=O)c3ccc(Cl)cc3[nH]c12	1.11
267	CC1(C)C(=O)N(c2ccc(SC(F)(F)F)cc2)C(=O)N1Cc1ccnc(N2CCOCC2)c1	3.73
268	Cc1ccc(Cl)c(Nc2cc(Nc3ccc(OCC(O)CN(C)C)cc3)ncn2)c1	2.16
269	CN(C)S(=O)(=O)c1ccc2c(C(=O)NC[C@@H](O)CN3CCC(Oc4ccc(Cl)c(Cl)c4)CC3)c[nH]c(=O)c2c1	3.13
270	C[C@@H](Oc1cccc2ncnc(Nc3ccc(OCc4ccccn4)c(Cl)c3)c12)C(=O)N(C)C	3.67
271	CC(CN(C)C)CN1c2ccccc2CCc2ccccc21	2.95
272	Cc1cc(Cl)ccc1OC1CCN(C[C@H](O)CNC(=O)c2c[nH]nc2C(F)(F)F)CC1	3.02
273	O=C(Nc1ccc(S(=O)(=O)N2CCOCC2)cc1)c1cc(Cl)ccc1NS(=O)(=O)c1ccc(Cl)s1	3.02
274	CN(C)CC(O)COc1ccc(Nc2cc(N(CC#N)c3cc(Cl)ccc3Cl)ncn2)cc1	2.1
275	CCN1CCC[C@H]1CNC(=O)c1c(OC)ccc(Br)c1OC	0.05
276	O=C(Nc1ccc([N+](=O)[O-])cc1O)Nc1ccccc1Br	3.9
277	COc1ccc(S(=O)(=O)NC(=O)N2CCC(N3CCC(Oc4ccc(Cl)c(Cl)c4)CC3)CC2)cc1	1.39
278	C[C@H](CN(C)C(=O)CO)Oc1cccc2ncnc(Nc3ccc(OCc4ccccn4)c(Cl)c3)c12	3.22
279	O=C(NCC12CC3CC(CC(C3)C1)C2)c1cc(O[C@H]2CCCNC2)ccc1Cl	2.18
280	Cc1cccc(Nc2ccccc2C(=O)O)c1C	1.89
281	CCCc1c(OCc2ccc(C(=O)O)c(Br)c2)ccc(C(C)=O)c1O	2.3
282	CC1CCC(CC(=O)Nc2cccc3ncccc23)CC1	3.56
283	CCCN[C@H]1CCc2nc(N)sc2C1	3.15
284	Nc1nc(OCc2nccs2)nc2c1ncn2[C@@H]1O[C@H](CF)[C@@H](O)[C@H]1O	0.47
285	CCNC(=O)C[C@@H]1N=C(c2ccc(Cl)cc2)c2cc(OC)ccc2-n2c(C)nnc21	2.46
286	Nc1ccccc1NC(=O)c1ccc(-c2ncc(CN3CCC3)cc2F)cc1	1.69
287	O=C(c1cccc(Cc2n[nH]c(=O)c3ccccc23)c1)N1CCN(c2ncccn2)CC1	2.13
288	O=c1[nH]c2c(O)ccc([C@@H](O)CNCCCSCCNCCc3ccccc3Cl)c2s1	0.99
289	c1ccc(-c2nnc(-c3ccccc3)s2)cc1	4.2
290	Cc1ccc(S(=O)(=O)Nc2c(C(=O)NCc3ccccc3)cnn2-c2ccccc2)cc1	1.9
291	CN1CCCC(CN2CCN(C(=O)Nc3ccc(Cl)c(Cl)c3)CC2)C1	1.98
292	CCCCN(CCNC[C@H](O)c1ccc(O)c2[nH]c(=O)sc12)C(=O)CCOCCc1ccccc1	2.51
293	Cc1ccc(S(=O)(=O)NC(=O)N2CCC(N3CCC(Oc4ccc(Cl)cc4)CC3)CC2)cc1	1.6
294	C[C@@]1(c2cc(-c3cncnc3)c(F)cc2F)CCSC(N)=N1	0.8
295	CC(C)Oc1cc(-n2cnc3cnc(N[C@@H](C)c4ncc(F)cn4)nc32)n[nH]1	2.41
296	Nc1[nH]ncc1-c1cc(Cl)ccc1Oc1cc(F)c(S(=O)(=O)Nc2cscn2)cc1Cl	2.3
297	Cc1cnc(C(=O)NCCc2ccc(S(=O)(=O)NC(=O)NC3CCCCC3)cc2)cn1	0.31
298	O=C(O)c1ccccc1Cn1nnc(-c2cccc(OCc3ccc4ccccc4n3)c2)n1	2.1
299	O=C(c1ccc(Cl)cc1)C1CCN(C(=O)C2CC2)CC1	2.72
300	COCCNCc1cccc(CCNC[C@H](O)c2ccc(O)c3[nH]c(=O)sc23)c1	0.01
301	COc1cc2ncc(C(N)=O)c(Nc3ccc(F)cc3)c2cc1OC	2.82
302	O=C(Nc1cccc(NC(=O)c2ccccc2)n1)c1ccccc1	4.02
303	N#Cc1ccc(Cl)cc1O[C@H](CCN)c1ccccc1	0.76
304	CCc1[nH]nc(NC(=O)Cc2ncc(Oc3ccnc4cc(OC)c(OC)cc34)cc2OC)c1C	2.79
305	C#CCN(c1cc(Nc2ccc(OCC(O)CN(C)C)cc2)ncn1)c1cc(Cl)ccc1Cl	2.8
306	Cc1c(Sc2ccc(Cl)cc2)c2c(Cl)nccc2n1CC(=O)O	0.92
307	O=C1COc2ccc(CNC3CCN(CCN4C(=O)COc5ccc(Br)cc54)CC3)nc2N1	1.42
308	CC(C)N1CCN(Cc2cnc(-c3ccc(C(=O)Nc4ccccc4N)cc3)c(Cl)c2)CC1	1.68
309	CC(C)CNc1nc(C#N)nc(N2CCNCC2)c1N	0.7
310	O=C(NC[C@@H](O)CN1CCC(Oc2ccc(Cl)c(Cl)c2)CC1)n1c(=O)[nH]c2ccccc21	4.46
311	Cc1c(Oc2ccc(Cl)cc2)c2cc(C(F)(F)F)ccc2n1CC(=O)O	2.28
312	CN(C)CCCN1c2ccccc2CCc2ccccc21	2.49
313	CN1CCOc2cc(COC3CCCCC3)cnc21	3.1
314	CC(C)C(NC(=O)Cn1c(-c2ccccc2)ccc(NC(=O)CN2CCOCC2)c1=O)C(=O)C(F)(F)F	2
315	COc1ccc(CCN(C)CCCC(C#N)(c2ccc(OC)c(OC)c2)C(C)C)cc1OC	2.61
316	O=C(Nc1cccc(-c2nnn[nH]2)c1)c1cc(F)cc2[nH]cnc12	0.29
317	O=c1n(CCCN2CCN(c3cccc(Cl)c3)CC2)nc2ccccn12	2.67
318	CC(C)Cn1c(=O)n(C)c(=O)c2c(C(=O)N3CC[C@@H](O)C3)c(Cc3ccccc3C(F)(F)F)sc21	2.74
319	CC(=O)c1ncccc1NC(=O)[C@H]1CC[C@H](N2C(=O)[C@H]3[C@H]4CC[C@H](C4)[C@H]3C2=O)CC1	3.01
320	CC(=O)Nc1ccc2nc(-c3cccc(F)c3)cc(O)c2c1	2.41
321	COc1ccc2nc(N[C@H]3CCC[C@H](NCc4ccsc4)C3)cc(C)c2c1	2.41
322	COc1cc(N2CCN(C(C)=O)CC2)ccc1Nc1ncc(Cl)c(-c2cnc3c(F)cccn23)n1	3.5
323	COc1ccc2ncc(=O)n(CCN3CCC(NCc4cc5c(cn4)OCCO5)CC3)c2n1	0.83
324	O=C(c1scc2c1CCCC2)N1CCCCC1	3.16
325	NC(=O)Nc1sc(-c2ccc(OCCN3CCCCC3)cc2)cc1C(N)=O	1.2
326	CC(C)C(NC(=O)Cn1c(-c2cccs2)ncc(NC(=O)OCc2ccccc2)c1=O)C(=O)C(F)(F)F	2.02
327	CS(=O)(=O)c1ccc2nc(N3CCN(C(=O)[C@@H]4CCCC[C@H]4C(=O)NC4(C#N)CC4)CC3)sc2c1	1.49
328	Oc1ccc(C2CNCCc3c2cc(O)c(O)c3Cl)cc1	0.87
329	CS(=O)(=O)c1cccc(Nc2nccc(Nc3c(Cl)ccc4c3OCO4)n2)c1	3.13
330	COc1ccc(OC)c(-c2cccc3c(N)c(C(=O)NC(C)C)nnc23)c1	3.65
331	O=c1cc(N2CCOCC2)oc2c(-c3cccc(-c4ccsc4)c3)cccc12	4.2
332	CC(C)(C)c1cc2nc3c(c(O)n2n1)CN(Cc1ccccc1)C3=O	1.9
333	[O-]c1c2c(nn1-c1ccc(Cl)cc1)c1ccccc1c[n+]2Cc1ccccc1	4.5
334	N#CC1(NC(=O)[C@@H]2CCCC[C@H]2C(=O)N2CCc3oc4ccccc4c3C2)CC1	3.01
335	COc1ccc(CNC(=O)Nc2ncc([N+](=O)[O-])s2)cc1	2.9
336	O=c1c(-c2ccc(O)c(O)c2)coc2cc(O)cc(O)c12	2.45
337	CO[C@H]1CC[C@]2(CC1)Cc1ccc(-c3cncc(Br)c3)cc1C21N=C(C)C(N)=N1	3.4
338	O=c1[nH]c2c(O)ccc([C@@H](O)CNCCc3cccc(CN4CCCC4)c3)c2s1	-0.28
339	COc1cc2ncc(C(N)=O)c(Nc3ccc(F)cc3F)c2cc1OC	2.95
340	CC(C)(C)OC(=O)N1CCN(c2ncc(OCc3ccncc3)cn2)CC1	3.4
341	Cc1ccc(O)c(O)c1	1.37
342	CCc1c2c(nc3ccc(O)cc13)-c1cc3c(c(=O)n1C2)COC(=O)[C@]3(O)CC	1.6
343	COc1cc2ncnc(Nc3ccc(F)c(Cl)c3)c2cc1NC(=O)/C=C/CN1CCCCC1	4.1
344	Nc1n[nH]cc1-c1cc(C(F)(F)F)ccc1Oc1cc(F)c(S(=O)(=O)Nc2cscn2)cc1Cl	2.65
345	CC(=O)Nc1ccc2ccn(-c3cc(NC4COC4)n4ncc(C#N)c4n3)c2c1	2.24
346	CCNC(=O)C[C@H]1N=C(c2ccc(Cl)cc2)c2cc(OC)ccc2-n2c(C)nnc21	2.42
347	Cc1ncc(CO)c(CO)c1O	-0.58
348	NC(=O)Nc1sc(-c2ccc(CNC3CCCC3)cc2)cc1C(N)=O	1.22
349	CS(=O)(=O)Nc1ccc(CCOCCCS(=O)(=O)CCNCCc2ccc(O)c3nc(O)sc23)cc1	1.34
350	Cc1nnc(C)c2cc(N3CCN(C(=O)[C@@H]4CCCC[C@H]4C(=O)NC4(C#N)CC4)[C@H](C)C3)ccc12	1.93
351	CC(=O)Nc1ccc2c(c1)N(c1cc(NC3CC3)n3ncc(C#N)c3n1)CC2	3.3
352	Fc1cc(F)cc(-c2cc(N(CCCN3CCCCCC3)Cc3ccc4c(c3)OCO4)on2)c1	3.84
353	COc1ccc2nc(C)cc(N3CC(CNC(=O)C4CC4)OC3=O)c2c1	1.55
354	Nc1nc2ccc(F)cc2s1	2.2
355	COc1cc(N2CC[C@@H](N(C)C)C2)c2[nH]c(C(=O)Nc3ccc(N4CCOCC4)cc3)cc(=O)c2c1	2.7
356	Clc1cccc(Nc2ncnc3ccccc23)c1	3.9
357	O=C(c1ccc(C(=C2CCN(Cc3cscn3)CC2)c2cccc3cccnc23)cc1)N1CCCC1	2.75
358	NC(=O)c1cnc(N[C@H]2CCCNC2)c2cc(-c3ccc(F)c(Cl)c3)sc12	2.94
359	O=C(NC1CCCC1)C(c1ccncc1)N(Cc1ccco1)C(=O)c1ccc(-c2ccccc2)[nH]1	4.36
360	Cn1c(=N)n(CC(=O)c2ccc(Cl)cc2)c2ccccc21	1.63
361	COc1cccc(C(=O)N2CCC(n3c(=O)[nH]c4ccccc43)CC2)c1	2.65
362	CCCS(=O)(=O)N1CCCC(C(=O)N2CCC(Cc3ccccc3)CC2)C1	3.44
363	COC1(c2ccc(NC(=O)c3cc(=O)c4cc(F)cc(-c5c(C)nn(C)c5C)c4o3)cn2)CCOCC1	2.98
364	CNC(=O)c1ccc(CCC(COc2ccc(-c3cccc([N+](=O)[O-])c3)cc2)N2C(=O)CSC2=O)cc1	3.5
365	CN1CCCC1c1cccnc1	0.5
366	Oc1nc2cc(Cl)cc(Cl)c2c(O)c1-c1ccccc1	1.6
367	CN(C)c1cccc2c(S(=O)(=O)Nc3cnccn3)cccc12	0.9
368	O=C1CC(c2ccc(O)cc2)Oc2cc(O)ccc21	2.4
369	Nc1nccc(-c2ccccc2)n1	2
370	OCCN1CC=CC[C@H](c2ccc(Cl)c(Cl)c2)C1	2.37
371	Cc1ccc(CO)cc1N(C)c1ccnc(Nc2cc(N3CCCCC3)cc(N3CCOCC3)c2)n1	4.2
372	COc1ccc2[nH]c3c(c2c1)CN(C(=O)[C@@H]1CCCC[C@H]1C(=O)NC1(C#N)CC1)CC3	2.4
373	O=C(NCc1ccc(OC(F)(F)F)cc1)C1c2ccccc2C(=O)N1CC1CC(F)(F)C1	3.9
374	CC(C)Cn1c(=O)n(C)c(=O)c2c(C(=O)N(C)C)c(Cc3ccccc3C(F)(F)F)sc21	2.9
375	CN[C@@H](C)C(=O)N[C@H](C(=O)N[C@H]1C[C@@H]2CC[C@H]1N(CCc1ccccc1)C2)C1CCCCC1	1.64
376	CCCc1c(OCCCSc2ccc(CC(=O)O)cc2Cl)ccc2c(CC)noc12	3.92
377	CCOc1ccc(Oc2ccc(S(=O)(=O)NC(=O)c3cccc(-c4ccc(Cl)c(Cl)c4)c3)cc2)cc1	2.94
378	O=c1c(O)cccc2cc(O)c(O)c(O)c12	2.03
379	O=c1[nH]c2c(O)ccc([C@@H](O)CNCCSCCCNCCc3cccc(C(F)(F)F)c3)c2s1	1.21
380	CCN(C(=O)NCc1ccccc1)C1CCN(CCC(c2ccccc2)c2ccccc2)CC1	4
381	CN1[C@H]2CC[C@@H]1C[C@H](OC(c1ccccc1)c1ccccc1)C2	1.49
382	O=c1[nH]c2c(O)ccc([C@@H](O)CNCCc3cccc(CN4CCC(c5ccccc5)CC4)c3)c2s1	1.99
383	O=C1c2ccc(O)cc2C(=O)N1c1cccc(O)c1	2
384	CC1(C)[C@@H]2CC[C@@]1(CS(=O)(=O)NC1CCN(c3ccc(C(F)(F)F)cn3)CC1)C(=O)C2	3.84
385	O=C(NCC1CCCCN1)c1cc(OCC(F)(F)F)ccc1OCC(F)(F)F	1.13
386	CN1CC=CCC(c2cc3ccccc3o2)C1	2.47
387	CC(=O)Nc1ccc2ccn(-c3cc(Nc4ccn(C)n4)n4ncc(C#N)c4n3)c2c1	3.57
388	Cc1ccc(N2CC(COc3ccc(-c4noc(C)n4)cc3)C2)nn1	2.62
389	c1ccc(CN(Cc2ccccc2)c2nn[nH]n2)cc1	1.37
390	CC(=O)c1ccc(N2CCN(S(=O)(=O)C[C@]34CC[C@H](CC3=O)C4(C)C)CC2)nc1	2.21
391	O=c1cc(N2CCOCC2)nc2n(Cc3cccc(Cl)c3Cl)ccn12	3.3
392	C[C@@H](NC1=CC(=O)NCC1)c1ccc(Nc2ncc3cc(-c4ccncc4)ccc3n2)cc1	3.02
393	C[C@H]1CN(Cc2cc(Cl)ccc2CCC(=O)O)CCN1C(=O)Cc1ccccc1	1.52
394	O=C1NC(=O)/C(=C/c2cccc(Cl)c2N2CCNCC2)S1	0.68
395	Nc1ccc2c(c1)C(=O)C(=O)c1ccccc1-2	2.23
396	Nc1ccccc1NC(=O)c1ccc(C2CCN(CCC(=O)Nc3ccccc3F)CC2)cc1	2.76
397	Cc1ncc(-c2ccnc(Nc3ccc(N4CCOCC4)cc3)n2)n1C(C)C	2.88
398	Cc1ccc(CO)cc1N(C)c1ccnc(Nc2cc(CN3CCOCC3)cc(N3CCOCC3)c2)n1	3
399	NC(=O)c1cc(O)cc2nc(-c3ccc(O)cc3)oc12	2.3
400	COc1ccc(N(C(=O)c2ccco2)C(C(=O)NC2CCCC2)c2ccccc2F)c(OC)c1	3.09
401	Cc1cccc([C@H](C)c2c[nH]c(=S)[nH]2)c1C	2.9
402	CC[C@H](NC(=O)c1c([S+](C)[O-])c(-c2ccccc2)nc2cc(F)ccc12)c1ccccc1	3.62
403	CCc1ccccc1-c1ccc(-c2nc3ccncc3c(O)c2C#N)cc1	3.5
404	CN(C)CCOc1cc(NS(=O)(=O)c2c(Cl)cc(C(F)(F)F)cc2Cl)ccc1Cl	2.99
405	O=c1oc2cc(O)ccc2cc1-c1ccc(O)cc1	2.9
406	COc1cc(C)c(S(=O)(=O)N(C)CCOCC(=O)N2CCN(C3CCN(C)CC3)CC2)c(C)c1	-0.4
407	CC(C)(C)c1cc(O)n2nc(N)nc2n1	-0.2
408	COc1ccc(-c2cc(O)c3cc(Cl)ccc3n2)cc1	2.7
409	C[C@]12Cc3cnn(-c4ccc(F)cc4)c3C=C1CC[C@@]2(O)CCc1ccc(F)cc1C(N)=O	3.8
410	Nc1ccc(Cl)c(C(=O)NCC23CC4CC(CC(C4)C2)C3)c1	3.45
411	Oc1ccc(-c2ccc3cc(O)ccc3c2)cc1	4
412	N#Cc1cnn2c(N)cc(-c3cccs3)nc12	2.3
413	CCC(c1nc2ccsc2c(=O)n1Cc1ccccc1)N(CCCN)C(=O)c1ccc(OC)cc1	1.39
414	Cc1cc(N)c2cc(NC(=O)CCCCC(=O)Nc3ccc4nc(C)cc(N)c4c3)ccc2n1	0.53
415	Cc1ccc(N(CC#N)c2cc(Nc3ccc(OCC(O)CN(C)C)cc3)ncn2)c(Br)c1	2.24
416	NC(=O)c1ccc(=O)n(Cc2ccc(F)c(F)c2)c1	1.37
417	C[C@H]1CN(Cc2cc(Cl)ccc2OC(C)(C)C(=O)O)CCN1S(=O)(=O)c1ccccc1	0.54
418	CCCSc1nc(NC[C@H]2CC[C@H](C(=O)O)CC2)ccc1C(=O)NC1CCCCC1	2.61
419	Cc1ccccc1Cn1ccn2c(=O)cc(N3CCOCC3)nc12	2.3
420	CNC(=O)c1c(F)cccc1Nc1nc(Nc2cc3c(cc2OC)CCN3C(=O)CN(C)C)nc2[nH]ccc12	2.61
421	O=C(NC1CCCS(=O)(=O)C1)c1ccc(Oc2ccc(C#C[C@]3(O)CN4CCC3CC4)cc2)cc1	1.4
422	CCCCN(CCCC)CCCOC(=O)c1ccc(N)cc1	1.93
423	O=C(O)C(c1ccccc1)N1CCC(CN2CCC(Oc3ccc(Cl)c(Cl)c3)CC2)CC1	2.17
424	CC(C)Cn1c(=O)n(C)c(=O)c2c(C(=O)N3CC(C)(O)C3)c(Cc3ccccc3C(F)(F)F)sc21	3.18
425	O=c1oc2ccc(O)cc2cc1-c1ccccc1	3.12
426	CN(C(=O)Cc1ccc(-n2cnnn2)cc1)C1CCN(Cc2ccc(C(F)(F)F)cn2)CC1	1.9
427	Nc1n[nH]c(Nc2ccccc2)n1	1.06
428	Cc1ccc(CO)cc1N(C)c1ccnc(Nc2cc(N3CCOCC3)cc(N3CCN(C)CC3)c2)n1	2.61
429	CN(C)CC(O)COc1ccc(Nc2nccc(Nc3ccccc3C#N)n2)cc1	1.2
430	Oc1c(I)cc(I)c2cccnc12	2.19
431	O=c1[nH]n(CC#Cc2ccccc2)c(=O)c2c(=O)c3ccc(Cl)cc3[nH]c12	1.78
432	O=c1[nH]c2c(O)ccc([C@@H](O)CNCCc3ccc(CNCCc4ccccc4F)cc3)c2s1	1.3
433	CN[C@H]1CC[C@@H](c2ccc(Cl)c(Cl)c2)c2ccccc21	3.15
434	Cc1cc(COc2cnc(N3CCN(C(=O)OC(C)(C)C)CC3)nc2)ccn1	3.7
435	CCCN(C)c1nc(N2CCC[C@@H](CC(=O)O)C2)ccc1C(=O)NC1CCCCC1	2.28
436	NC12CCC(c3ccccc3)(CC1)CC2	0.29
437	COc1cc(-c2nn[nH]n2)ccc1Cn1ccc2ccc(NC(=O)OC3CCCC3)cc21	2.7
438	CCc1nc2c(N)nc3ccccc3c2n1CCCCNS(C)(=O)=O	1.24
439	Cc1ccc(NC(=O)c2cccc(N(C)C)c2)cc1NC(=O)c1ccc(OC(C)C)cc1	3.1
440	CC(=O)Nc1nnc(S(N)(=O)=O)s1	-0.78
441	CCC[C@H]1CN(Cc2cc(Cl)ccc2OCC(=O)O)CCN1S(=O)(=O)c1ccccc1	1.02
442	Nc1ncnc2sc(-c3c(-c4ccccc4)ncn3C[C@H]3CCCO3)nc12	2.65
443	CC(C)C(NC(=O)Cn1c(C2CCCCC2)ncc(NC(=O)OCc2ccccc2)c1=O)C(=O)C(F)(F)F	2.87
444	NC1(c2ccc(-c3ncc4ncccc4c3-c3ccccc3)cc2)CCC1	2
445	CC(=O)Nc1ccc2ccn(-c3cc(NCCCCO)n4ncc(C#N)c4n3)c2c1	2.58
446	COC1=CC(c2cc3ccccc3[nH]2)=N/C1=C\c1[nH]c(C)cc1C	2.55
447	Nc1ccccc1NC(=O)c1ccc(N2CCOCC2)cc1	1.2
448	CCC(CCNC)Oc1cc(Cl)ccc1C#N	0.38
449	O=C(Nc1ccccc1)c1cc2ccccc2o1	3.44
450	COc1cc2ncnc(Nc3ccc(OCc4ccccn4)c(C)c3)c2cc1OC	3.6
451	COCCC(=O)N[C@H](C)c1ccc(Nc2ncc3cc(-c4ccncc4)ccc3n2)cc1	3.08
452	CC(C)C(NC(=O)Cn1c(-c2ccc(F)cc2)ncc(NC(=O)OCc2ccncc2)c1=O)C(=O)C(F)(F)F	2.22
453	CN[C@@H](C)C(=O)N[C@H](C(=O)N[C@H]1CCN(C(=O)Cc2ccccc2)C1)C1CCCCC1	0.81
454	Cc1c(Cl)ccc(OC2CCN(C3CCN(C(=O)NS(=O)(=O)c4ccc(N(C)C)cc4)CC3)CC2)c1Cl	2
455	COc1ccc2c(c1)c(CC(=O)O)c(C)n2-c1ccnc2cc(Cl)ccc12	1.68
456	N=C(N)Nc1cc(Cl)nc(-c2ccccc2)n1	2.16
457	CC(C)Oc1cc(OCCCN2CCCC2)cc2ncnc(Nc3c(Cl)ccc4c3OCO4)c12	3.1
458	CCN(CC)CCOc1ccc(N(C)C(=O)c2ccc(-c3ccc(C(F)(F)F)cc3)cc2)cc1OC	3.13
459	Cc1ccc(S(=O)(=O)Nc2c(C(=O)N[C@@H](C)C(C)(C)C)c(C)nn2C(C)(C)C)cc1	1.84
460	COc1cc(Nc2ncnc3cccc(O[C@H](C)C(=O)N4CCOCC4)c23)ccc1Oc1ccc(C)nc1	3.6
461	CS(=O)(=O)c1ccccc1C(=O)NCC(O)CNC1CCN(Cc2ccc(Cl)c(Cl)c2)CC1	1.21
462	CN(C(=O)Cc1ccc(-n2cnnn2)cc1)C1CCN(Cc2nc3c(s2)CCCC3)CC1	2.5
463	C[C@H](Oc1ccc(Cl)cc1CN1CCN(C(=O)Cc2ccc(Cl)cc2)[C@@H](C)C1)C(=O)O	1.66
464	Cn1sc(NCc2ccccc2)nc1=O	1.2
465	N#CC1(NC(=O)[C@@H]2CCCC[C@H]2C(=O)N2CCc3[nH]c4ccc(Cl)cc4c3C2)CC1	3.65
466	COc1cccc(CNCc2cccc(CCNC[C@H](O)c3ccc(O)c4[nH]c(=O)sc34)c2)c1	0.91
467	Nc1ncc2cc(-c3c(Br)cccc3Br)c(N)nc2n1	2.06
468	O=C(O)c1cccc(CN2CCC(CN3CCC(Oc4ccc(Cl)c(Cl)c4)CC3)CC2)c1	1.26
469	Cc1cc(C)c2c(N)c(C(=O)NCc3ccccc3)sc2n1	3.41
470	C[C@H]1CN(C(=O)OC(C)(C)C)CCN1c1ncc(OCc2ccc(S(C)(=O)=O)cc2)cn1	3.5
471	Cn1ncnc1-c1c2c(=O)n(C)c(=O)n(CC3CC3)c2nn1Cc1ccnc2ccc(Cl)cc12	3.8
472	CCN(CC)c1ccc(-c2nn3c(-c4[nH]nc5c4CCC5)nnc3s2)cc1	3.37
473	Nc1ncnc2sccc12	1.19
474	CC(O)(C(=O)Nc1ccc2c(c1)-c1ccccc1S2(=O)=O)C(F)(F)F	3
475	CC(C)(C(=O)O)c1ccc(C(O)CCCN2CCC(C(O)(c3ccccc3)c3ccccc3)CC2)cc1	0.42
476	Nc1c(C(=O)NC2CC2)nnc2c(-c3ncccn3)c(F)ccc12	1.59
477	O=C([C@@H](O)CO)N1CC=C(c2ccc(N3C[C@H](COc4ccon4)OC3=O)cc2F)CC1	1.09
478	Cc1nc(C)c(-c2ccc3c(c2)CC[C@]32CC[C@@H](C(=O)O)CC2)nc1C(N)=O	1.2
479	COc1c2occc2cc2ccc(=O)oc12	1.97
480	CC(C)CNCc1ccc(-c2ccccc2S(=O)(=O)N2CCCC2)cc1	1.9
481	O=C(COCc1ccncc1)N1CCN(c2ccc(Cl)cc2F)CC1	2.55
482	OCCNCc1cc(Br)ccc1OCc1ccc(Cl)cc1	2.98
483	O=C(Nc1c(Cl)cncc1Cl)c1ccc(OC(F)F)c(OCC2CC2)c1	3.95
484	Cc1cccc(C(N)=O)c1NC(=O)c1ccccc1	1.09
485	Cc1nnc(N)s1	-0.4
486	Cc1cc(Cl)ccc1OC1CCN(C[C@H](O)CNC(=O)c2c[nH]c(=O)c3c(F)cccc23)CC1	3
487	N=C(N)c1ccc(C(=O)N2CCN(S(=O)(=O)c3ccc4cc(Br)ccc4c3)CC2)cc1	0.36
488	CC(c1ccccn1)n1[nH]c(=O)c2nc3cc(Cl)ccc3c(O)c2c1=O	0.51
489	c1cn(-c2ccc(Oc3nccc(Oc4ccc5c(c4)OCO5)n3)cc2)cn1	3.27
490	CC(C)Oc1cc(Oc2ccc(S(C)(=O)=O)cc2)cc(C(=O)Nc2nccs2)c1	3.61
491	NS(=O)(=O)c1ccc(CCNc2ccc3nnc(-c4ccccc4)n3n2)cc1	2.19
492	C[C@H]1COc2c(N3CCN(C)CC3)c(F)cc3c(=O)c(C(=O)O)cn1c23	-0.35
493	CCc1ccc(CCOc2ccc(CC3SC(=O)NC3=O)cc2)nc1	2.8
494	CC[C@H](NC(=O)c1c(N)c(-c2cccc(F)c2)nc2ccccc12)c1ccccc1	4.05
495	COc1cc2c(Nc3ccc(F)cc3F)c(C(N)=O)cnc2cc1N1CCN(C)CC1	1.75
496	CNC(=O)c1ccc(Oc2ccc(C#C[C@]3(O)CN4CCC3CC4)cc2)cc1	1.99
497	N#Cc1nc(NC2CCOC2)c(N)c(N2CCOCC2)n1	1.6
498	Cn1c(N)nc(CCc2ccccc2)cc1=O	2
499	CS(=O)(=O)N1CCN(Cc2cc3nc(-c4cccc5[nH]ncc45)nc(N4CCOCC4)c3s2)CC1	3.3
500	CC1(C)Oc2ncnc(N)c2N=C1c1ccc([C@H]2CC[C@H](CC(=O)O)CC2)cc1	1.32
501	CN(C)c1ccc(S(=O)(=O)NC(=O)N2CCC(N3CCC(Oc4ccc(Cl)c(Cl)c4)CC3)CC2)cc1	1.7
502	COCCC(=O)Nc1ccc(Nc2ncc3cc(-c4ccncc4)ccc3n2)cc1	2.78
503	Cc1cc(OC2CCN(CC3CCN([C@@H](Cc4ccc(F)cc4)C(=O)O)CC3)CC2)ccc1Cl	2.54
504	CS(=O)(=O)NCCC(NC(=O)C1(N)CCN(c2ncnc3[nH]ccc23)CC1)c1ccc(Cl)cc1	2.2
505	CS(=O)(=O)N1CCc2c(-c3cnc(N)nc3)nc(N3CCOCC3)nc21	1.2
506	Nc1nc(N)c2cc(NCc3ccc(Cl)c(Cl)c3)ccc2n1	2.22
507	Cc1c(Sc2ccc(Cl)cc2)c2ccc(S(C)(=O)=O)cc2n1CC(=O)O	0.79
508	COc1cc(-c2c(F)ccc3c(N)c(C(=O)NC4CC4)nnc23)c(OC)nn1	2.75
509	CN1CCN(c2ccc3ncc(C(N)=O)c(Nc4ccc(F)cc4F)c3c2)CC1	2.3
510	CCn1c(-c2ccnc(Nc3ccc(C(=O)NC)cc3)n2)cnc1C	2.53
511	OC1(c2ccc(Cl)cc2)CCN(Cc2c[nH]c3ccccc23)CC1	2.25
512	CCNCc1cnc(-c2ccc(C(=O)Nc3ccccc3N)cc2)s1	0.95
513	N#CCNC(=O)[C@@H]1CCCC[C@H]1C(=O)N1CCc2[nH]c3ccc(F)cc3c2C1	2.77
514	O=S(=O)(Cc1cc(Cl)cc(Cl)c1)NCC(c1ccccc1)N1CCCCCC1	3.23
515	N#Cc1ccc(CN2CCN(c3ccc4nnc(C(F)(F)F)n4n3)CC2)cc1	2.9
516	FC(F)c1nc2ccccc2n1-c1nc(N2CCOCC2)nc(N2CCOCC2)n1	3.04
517	CN[C@@H](C)C(=O)N[C@H](C(=O)N[C@H]1CCCN(CCc2ccccc2)C1)C(C)(C)C	1.46
518	CC1CCN(C(=O)c2scc3c2OCCO3)CC1	2.26
519	C[C@H](NC1=NC(=O)C(C)(C(F)(F)F)S1)c1ccccc1F	3.1
520	COCCNCc1ccc(Nc2ncc3cc(-c4ccncc4)ccc3n2)cc1	1.86
521	Nc1ccc(S(=O)(=O)N2CCCC2)cc1	0.98
522	N#CC1(NC(=O)[C@@H]2CCCC[C@H]2C(=O)N2CCN(c3ccccc3)CC2)CC1	1.99
523	COc1cc2ncnc(N3CC[C@@H](Oc4cnc5ccccc5n4)C3)c2cc1OC	4.04
524	CNc1c(Cl)cnc2[nH]c(-c3ccc(OCCN4CCOCC4)cc3)nc12	2.63
525	COc1c(N2CCO[C@@H](CN(C)C)C2)c(F)cc2c(=O)c(C(=O)O)cn(C3CC3)c12	-0.62
526	O=C(NC1CCCCC1)c1cccnc1Sc1ccccc1	3.01
527	C[C@]12CC[C@@H]3c4ccc(O)cc4CC[C@H]3[C@@H]1CC[C@@H]2O	3.72
528	C[C@]12CC[C@@H]3c4ccc(O)cc4CC[C@H]3[C@@H]1CCC2=O	3.4
529	CCS(=O)(=O)c1ccc(-c2cc(C(F)(F)F)ccc2OCC(N)=O)c(C)c1	2.77
530	C[C@H](CO)Nc1nc(SCc2cccc(F)c2F)nc2nc(NC3CC3)sc12	4.37
531	O=C(CSc1ccncc1)Nc1ccc(C(=O)c2ccccc2)cc1	3.6
532	O=c1c(-c2ccc([N+](=O)[O-])cc2)coc2cc(O)cc(O)c12	3.24
533	CC(C)Cn1c(=O)n(C)c(=O)c2c(C(=O)N3CCC3)c(Cc3ccccc3C(F)(F)F)sc21	3.46
534	C[C@@H](O)[C@H]1C(=O)N2C(C(=O)OCOC(=O)C(C)(C)C)=C(SC3CN(C4=NCCS4)C3)[C@H](C)[C@H]12	2.1
535	C[C@H](Nc1ccc2ncn(-c3cc(C4CC4)[nH]n3)c2n1)c1ncc(F)cn1	2.74
536	Cc1cc(N(C)S(C)(=O)=O)ccc1-c1cc(C(F)(F)F)ccc1OCC(=O)O	-0.59
537	CC/C(=C(\c1ccccc1)c1ccc(/C=C/C(=O)O)cc1)c1ccccc1	3.89
538	CN[C@@H](C)C(=O)N[C@H](C(=O)N[C@H]1CCCN(CCc2ccc(C(F)(F)F)cc2)C1)C(C)(C)C	2.85
539	CCCCC1C(=O)N(c2ccccc2)N(c2ccccc2)C1=O	0.45
540	CC(=O)NC1CC2CCCC(C1)N2C(=O)Nc1ccc(Cl)c(C(F)(F)F)c1	2.79
541	COc1c(Nc2ccc(S(C)(=O)=O)nc2C)ncnc1OC1CCN(C(=O)OC(C)C)CC1	2.4
542	CC(=O)Nc1ccc(-c2ccnc(Nc3ccc(N4CCOCC4)cc3)n2)cc1	2.91
543	O=C(O)c1[nH]c2ccccc2c1CCCOc1cccc2ccccc12	2.75
544	C[C@H]1CN(Cc2cc(Cl)ccc2OCC(=O)O)CCN1C(=O)Cc1ccc(Cl)cc1	1.21
545	Cc1nc2nc(-c3cccnc3)nn2c(O)c1Cc1ccccc1	1.52
546	Cc1cc(Nc2cc(N3CCOCC3)nc(N[C@@H](C)c3ncc(F)cn3)n2)n[nH]1	1.91
547	COc1ccc(NC(=O)CSc2nnc(C)n2-c2ccc(C)cc2)cc1	2.94
548	CC1CC(CN)CC(CO)C1	-1.4
549	FC(F)(F)c1nnc2ccc(NCc3cccnc3)nn12	2.06
550	OC1(c2ccccc2)CNCCc2ccccc21	1.38
551	CC(=O)NC[C@H]1CN(c2ccc(N3CCOCC3)c(F)c2)C(=O)O1	0.67
552	C[C@@H]1CN(c2ncc(F)cn2)CCN1c1ncc(OCc2ccncc2C#N)cn1	3.4
553	Cc1cnc(NC(=O)Cc2ccccc2)s1	2.9
554	c1ccc2ncncc2c1	1
555	CC(C)(C)NS(=O)(=O)c1cncc(-c2ccc3nc(N)nn3c2)c1	1.41
556	O=c1[nH]c2c(O)ccc([C@@H](O)CNCCSCCCOCCc3ccccc3)c2s1	2.54
557	CCC(C)(C)C(=O)O[C@H]1C[C@@H](C)C=C2C=C[C@H](C)[C@H](CC[C@@H]3C[C@@H](O)CC(=O)O3)[C@H]21	3.7
558	C[C@H]1CN(Cc2cc(Cl)ccc2OCC(=O)O)CCN1C(=O)Cc1ccccc1Cl	1.1
559	Cc1cc2n[nH]c(=O)n2c2cc(-c3ccccc3CO)ccc12	3.18
560	Cc1ccc(NC(=O)c2cccc(N3CCOCC3)c2)cc1NC(=O)c1ccc(OCc2ccccn2)cc1	3.2
561	NC1=NC(c2ccco2)Nc2c(F)ccc(F)c21	1.2
562	CC(=O)CC(c1ccccc1)c1c(O)c2ccccc2oc1=O	0.86
563	CC(C)C(C#N)(CCCN(C)CCc1ccccc1)c1ccccc1	3.6
564	O=S(=O)(CCCOCCSc1ccccc1)CCNCCc1ccc(O)c2nc(O)sc12	2.68
565	C[C@@H](O)[C@@H](CO)Nc1nc(SCc2cccc(F)c2F)nc2nc(N)sc12	2.83
566	O=C(c1ccc(F)cc1)C1CCN(CCn2c(=O)[nH]c3ccccc3c2=O)CC1	2.9
567	O=C(NCc1ccncc1)c1ccc(Oc2ccc(C#CC3(O)CN4CCC3CC4)cc2)cc1	2.48
568	CS(=O)(=O)c1ccc2c3c([nH]c2c1)CCN(C(=O)[C@@H]1CCCC[C@H]1C(=O)NC1(C#N)CC1)C3	1.5
569	CC(=O)N[C@H](C)c1ccc(Nc2ncc3cc(-c4ccncc4)c(C)cc3n2)cc1	3.45
570	CC[C@@H](c1ccc(C(=O)O)c(Oc2cccc(Cl)c2)c1)N1CCC[C@H](n2cc(C)c(=O)[nH]c2=O)C1	0.22
571	O=c1ccc2ccccc2[nH]1	1.32
572	CN(CCO)Cc1ccc(-c2cc(C(N)=O)c(NC(N)=O)s2)cc1	0.97
573	COc1ccc(C=C2SC(=O)NC2=O)cc1OC	1.17
574	CCCc1c(OCc2cccc(NC(=O)c3ccccc3C(=O)O)c2)ccc(C(C)=O)c1O	1.9
575	Cc1c(Cl)ccc(OC2CCN(C[C@H](O)CNC(=O)c3c[nH]c(=O)c4cc(S(C)(=O)=O)ccc34)CC2)c1Cl	2.83
576	COc1ccc(C(=O)C2CCN(C(=O)c3ccc(F)cc3)CC2)cc1	2.92
577	CC(C)NC[C@@H](C(=O)N1CCN(c2ncnc3c2[C@H](C)C[C@H]3O)CC1)c1ccc(Cl)cc1	1.3
578	Cc1cn([C@H]2CCCN(Cc3ccc(C(=O)O)c(Oc4cccc(Br)c4)c3)C2)c(=O)[nH]c1=O	-0.51
579	COc1cc(C(=O)NS(=O)(=O)c2ccccc2)ccc1Cn1ncc2ccc(NC(=O)OC3CCCC3)cc21	1.8
580	O=C(NC[C@@H](O)CN1CCC(Oc2ccc(Cl)c(Cl)c2)CC1)c1c[nH]c(=O)c2cc(S(=O)(=O)NC3CC3)ccc12	3.67
581	Cc1ccc(NC(=O)c2ccc(C#N)cc2)cc1-n1cnc2ccc(N3CCN(C)CC3)cc2c1=O	2.73
582	N#CC1(NC(=O)[C@@H]2CCCC[C@H]2C(=O)N2CCc3[nH]c4cccc(F)c4c3C2)CC1	3.2
583	O=[N+]([O-])c1ccc2c(c1)nc1n2CCCCC1	2.58
584	CC1(c2c(C(=O)NC3C4CC5CC(C4)CC3C5)cnn2-c2ccc(C(=O)O)cc2)CC1	1.11
585	COc1ccc2c(C)cc(N[C@H]3CCC[C@H](NCc4ccsc4)C3)nc2c1	2.46
586	OCC[C@]1(c2cc3ccccc3o2)CCCNC1	0.12
587	Oc1ccc(-c2nc3ccc(O)cc3s2)cc1	3.65
588	CC[C@H](NC(=O)c1c([S+](C)[O-])c(-c2ccccc2)nc2cc(CN(C)C)ccc12)c1ccccc1	2.75
589	CC(=O)c1ccc2[nH]c(-c3cccnc3)cc(=O)c2c1	1.41
590	O=C(O)c1cccc(C(=O)N2CCC(N3CCC(Oc4ccc(Cl)c(Cl)c4)CC3)CC2)c1	1.23
591	Cc1c(Sc2ccc(Cl)cc2)c2cc(F)ccc2n1CC(=O)O	1.84
592	COc1ccc2c(C)cc(N[C@H]3CCC[C@H](NCc4cccc(OC(F)(F)F)c4)C3)nc2c1	3.61
593	CCOc1cc2nnc(C(N)=O)c(Nc3cccc(Cl)c3F)c2cc1N1CCN(C)CC1	1.99
594	COc1ccc(C(C)NC(=O)C2(N)CCN(c3ncnc4[nH]ccc34)CC2)cc1OC	1.8
595	Cc1ccc(NC(=O)c2cccc(N(C)S(C)(=O)=O)c2)cc1NC(=O)c1ccc2ncccc2c1	2.8
596	Cc1ccc(C(=O)N(CCCN)[C@H](c2nc3cc(Cl)ccc3c(=O)n2Cc2ccccc2)C(C)C)cc1	2.88
597	CC(=O)N1CCN(CCOc2ccc(C3CCN(c4ccc5nnc(C(F)(F)F)n5n4)CC3)cc2)CC1	3.2
598	Cc1cc(C)c2c(N)c(C(=O)NC3CC3)sc2n1	2.53
599	Cc1ccc(Nc2c(F)cccc2Cl)c(CC(=O)O)c1	1.02
600	COC(=O)CCC(=O)Nc1ccc2c(c1)-c1ccccc1C(=O)C2=O	2.72
601	NC(=O)c1cnc(N[C@H]2CCCNC2)c2cc(-c3ccncc3)sc12	0.77
602	Cc1cccc(N(Cc2cc(F)c(F)cc2F)C(=O)O[C@H]2CN3CCC2CC3)c1	2.24
603	N#Cc1ccc2c(c1)N(CCN1CCC(NCc3ccc4c(n3)NC(=O)CO4)CC1)C(=O)CO2	0.23
604	Cn1sc(NC(=O)c2ccccc2)nc1=O	1.13
605	C[C@@H]1c2c([nH]c3ccc(C(F)(F)F)cc23)C[C@@H]2CCN(CCN3CCOCC3)C[C@H]21	2.87
606	CC(C)NCC(O)COc1cccc2[nH]ccc12	-0.12
607	Cc1cc(Nc2nc(N[C@@H](C)c3ncc(F)cn3)ncc2C)n[nH]1	1.75
608	CN(C)CCNCc1ccc(Nc2ncc3cc(-c4ccncc4)ccc3n2)cc1	1.4
609	Cc1ccccc1Nc1ncnc2ccccc12	2.85
610	Cn1c(CN2CCN(c3ccccc3)CC2)nc2ccccc21	3.11
611	CC(C)Cn1c(=O)n(C)c(=O)c2c(C(=O)N3CCCCC3)c(Cc3ccccc3C(F)(F)F)sc21	4.07
612	N#Cc1nc(NC2CCCC2)c(N)c(N2CCOCC2)n1	2.59
613	c1ccc([C@H]2CN3CCSC3=N2)cc1	0.81
614	CCCCOc1nc(N)c2[nH]c(=O)n(Cc3cccc(CC(=O)OC)c3)c2n1	3.76
615	CC(C)(C)OC(=O)N1CCN(c2ccc(OCc3ccc(S(C)(=O)=O)cc3)cc2)CC1	3.9
616	COc1cc(N2CCN(C(C)=O)CC2)ccc1Nc1ncc(Cl)c(-c2cnc3ccc(N(C)C)cn23)n1	4.1
617	COc1ccc(NC(=O)c2ccnc(N)n2)cc1	1.72
618	O=C(NC[C@@H](O)CN1CCC(Oc2ccc(Cl)c(Cl)c2)CC1)c1c[nH]c(=O)c2cc(S(=O)(=O)N3CCC3)ccc12	3.02
619	CCC(CC)C[C@H](c1ccc(C(=O)O)c(Oc2cccc(Cl)c2)c1)N1CCC[C@H](n2cc(C)c(=O)[nH]c2=O)C1	1.68
620	CN(c1ccnc(Nc2cccc(S(C)(=O)=O)c2)n1)c1cccc2[nH]ncc12	3.21
621	O=C(N[C@H]1CN2CCC1CC2)c1ccc(-c2ccccn2)s1	0.7
622	Cc1cc(Nc2nc(N[C@@H](C)c3ncc(F)cn3)c(C#N)nc2C)n[nH]1	1.92
623	COc1cc(F)ccc1-c1cncc(CNC(=O)c2ccccc2)c1	3.76
624	COc1cc(OC)c(S(=O)(=O)N2c3ccccc3CCC2C)cc1NC(=O)CSc1ccncc1	2.82
625	Cc1cc(Nc2ccccc2)n(CCC#N)n1	2.3
626	CNC(=O)c1ccccc1Sc1ccc2c(/C=C/c3ccccn3)n[nH]c2c1	3.8
627	COc1cc(OC)nc(-n2ncc(Cl)c(Cl)c2=O)n1	1.4
628	O=S(=O)(CCCOCCc1cc2ccccc2o1)CCNCCc1ccc(O)c2nc(O)sc12	2.86
629	Cc1ccc(S(=O)(=O)Nc2c(C(=O)N[C@@H](C)C(C)(C)C)c(C)nn2C2CCN(C)CC2)cc1	0.8
630	NC1(c2ccc(-c3c(-c4ccccc4)ccn4ncnc34)cc2)CCC1	1.7
631	CN1CCN(C(=O)c2cc3ccccc3n2C)CC1	1.71
632	CN(C)CC(O)COc1ccc(Nc2nccc(Nc3ccc(Cl)cc3)n2)cc1	2.6
633	CC(C)Cn1c(=O)n(C)c(=O)c2c(C(=O)N3C[C@H](O)CO3)c(Cc3ccnc4ccccc34)sc21	2.14
634	COc1cc(N2CCN(C(C)=O)CC2)ccc1Nc1ncc(Cl)c(-c2cnc3c(OC)cccn23)n1	3.5
635	CCCSc1c(C(=O)N(C)C2CCCCC2)cnn1-c1ccc(C(=O)O)cc1	0.59
636	O=S(=O)(Cc1cc(N2CCOCC2)nc(-c2ccccn2)n1)c1ccccc1	1.34
637	CCN(CC)C(=O)N[C@H]1C[C@@H]2c3cccc4[nH]cc(c34)C[C@H]2N(C)C1	2.73
638	CCOC(=O)C1(c2ccccc2)CCN(C)CC1	1.4
639	Cc1cc(O[C@@H]2C[C@@H]3CC[C@H](C2)N3Cc2ccccc2)cc(C(N)=O)c1	2.08
640	Oc1cc(O)cc(/C=C/c2ccc(O)c(O)c2)c1	2.11
641	CS(=O)(=O)c1ccc([C@@H](O)[C@@H](CF)NC(=O)C(Cl)Cl)cc1	0.44
642	COCCNC(=O)c1ccc(Nc2ncc3cc(-c4ccncc4)ccc3n2)cc1C	2.78
643	Cc1cccc2c3c([nH]c12)CCN(C(=O)[C@@H]1CCCC[C@H]1C(=O)NC1(C#N)CC1)C3	2.99
644	Cc1cc(N)c2cc(NC(=O)CCC(=O)Nc3ccc4nc(C)cc(N)c4c3)ccc2n1	1.39
645	COc1cccc2c(-c3c(C)n(CC(=O)O)c4ccc(C)cc34)ccnc12	0.49
646	c1ccc(-c2nnc3ccc(NC4CC4)nn23)cc1	3.15
647	CC(=O)NCC(NC(=O)C1(N)CCN(c2ncnc3[nH]ccc23)CC1)c1ccc(Cl)cc1	2.4
648	CC(=O)N1CCN(c2ccc(Nc3nccc(-c4cnc5ccccn45)n3)cc2)CC1	2.82
649	Cc1c(Cl)ccc(OC2CCN(C[C@H](O)CNC(=O)c3c[nH]nc3C(F)(F)F)CC2)c1Cl	3.66
650	NC1(c2ccc(-c3c(-c4ccccc4)ncc4nccn34)cc2)CCC1	1.7
651	CCc1c(C)[nH]c2c1C(=O)C(CN1CCOCC1)CC2	1.54
652	NC1(c2ccc(-c3ncc4cccnc4c3-c3ccccc3)cc2)CCC1	1.7
653	O=[N+]([O-])c1ccc(C=NO)o1	1.31
654	O=C(c1cccc(Cl)c1Cl)N1CCN(c2ccccn2)CC1	2.98
655	CC(=O)Nc1ccc2[nH]cc(-c3cc(NC4CC4)n4ncc(C#N)c4n3)c2c1	2.65
656	c1cc2c(cc1-c1cnc3n1CCC3)OCCO2	2.33
657	CNC1=Nc2ncccc2C(c2ccco2)=NC1c1cccs1	1.85
658	N#Cc1c(-c2ccc(-c3ccccc3C(F)(F)F)cc2)nc2ccncc2c1O	3.3
659	CC(=O)N[C@H](C)c1ccc(Nc2ncc3cc(-c4ccncc4)cc(C)c3n2)cc1	3.46
660	CCC(CC)NC(=O)c1cnn(-c2ccccc2)c1NS(=O)(=O)c1ccc(C)cc1	0.79
661	CC(=O)c1cn(Cc2ccccc2)c(=O)n(Cc2ccc(F)cc2)c1=O	3.2
662	Cc1nc(C)c(-c2ccc(C34CCC(C(=O)O)(CC3)CC4)cc2)nc1C(N)=O	1.3
663	Cc1sc2ncnc(SCC(=O)N3CCN(C(=O)c4ccco4)CC3)c2c1C	2.7
664	O=C(O)CCCS(=O)(=O)c1cccc(C(=O)N2CCC(N3CCC(Oc4ccc(Cl)c(Cl)c4)CC3)CC2)c1	0.66
665	CCOC(=O)[C@H](Cc1ccc([N+](=O)[O-])cc1)NC(=O)c1ccccc1	2.79
666	CCc1cccc(N(C)C(=N)Nc2cccc3ccccc23)c1	1.57
667	CC[S+]([O-])c1ncccc1C1(O)CCN(CC23CC(c4ccccc42)c2ccccc23)CC1	2
668	Cn1c(N)nc(CCc2cccc(-c3ccccc3)c2)cc1=O	3.8
669	Cc1cc2n[nH]c(=O)n2c2cc(-c3ccco3)ccc12	2.07
670	C[C@@H](NC1=CC(=O)CC1)c1ccc(Nc2ncc3cc(-c4ccncc4)ccc3n2)cc1	3.2
671	CCCSc1ncccc1C(=O)NC1CCCCC1	3.24
672	Cc1ccc(S(=O)(=O)Nc2c(C(=O)N[C@H](C)C(C)(C)C)c(C)nn2-c2ccccc2)cc1	1.2
673	COc1ccc2ncc(=O)n(CCN3CC[C@H](NCc4cc5c(cn4)OCCO5)[C@H](O)C3)c2c1	0.77
674	O=C(NCc1ccnc2ccccc12)c1ccc(Oc2ccc(C#C[C@]3(O)CN4CCC3CC4)cc2)cc1	3.88
675	CCCNCC(O)COc1ccccc1C(=O)CCc1ccccc1	1.72
676	CCN(CC)c1ccc2cc(C(=O)O)c(=O)oc2c1	-0.2
677	CC(C)N1CCN[C@@H](C(=O)N2CCN(C(=O)Nc3ccc(Cl)c(Cl)c3)CC2)C1	2.21
678	C[C@H]1CN(c2nc(N3CCOC[C@@H]3C)c3ccc(-c4ccccc4)nc3n2)C[C@@H](C)O1	3.75
679	Cc1cc(=O)n(-c2ccccc2)n1C	0.11
680	Cc1cn([C@H]2CCCN(Cc3ccc(C(=O)O)c(Oc4cccc(F)c4)c3)C2)c(=O)[nH]c1=O	-1.03
681	CC(C)[C@H](N)C(=O)OCCOCn1cnc2c(=O)nc(N)[nH]c21	-1.3
682	CN[C@@H](C)C(=O)N[C@H](C(=O)N[C@H]1CCCN(CCc2ccccc2)C1)C1CCCCC1	1.65
683	CNc1c(Br)cnc2[nH]c(-c3ccc(S(C)(=O)=O)cc3)nc12	2.88
684	O=C1CN2Cc3c(ccc(Cl)c3Cl)N=C2N1	1.86
685	O=C(O)c1cccnc1N1CCC(CN2CCC(Oc3ccc(Cl)c(Cl)c3)CC2)CC1	1.71
686	CC(=O)Nc1nc(N)n(-c2ccccc2)n1	-0.2
687	CC(C)NC[C@H](O)COc1cccc2ccccc12	0.99
688	CC(C)C(NC(=O)Cn1c(-c2ccccc2)ccc(NC(=O)Cc2ccccc2C(=O)O)c1=O)C(=O)C(F)(F)F	1.14
689	CCOC(=O)c1c(-c2ccccc2)nc2cc(C)ccn12	3.8
690	CN(c1ccccc1)c1ccnc(Nc2cc(N3CCOCC3)cc(N3CCOCC3)c2)n1	3.47
691	Nc1ncnc2c1ncn2[C@@H]1O[C@H](CSCCCNC(=O)NCc2ccccc2)[C@@H](O)[C@H]1O	0.9
692	COc1cc2ncnc(Nc3cc4ccccc4cn3)c2cc1OC	3.9
693	Oc1ccc2c3c1O[C@H]1c4[nH]c5ccccc5c4C[C@@]4(O)[C@@H](C2)N(CC2CC2)CC[C@]314	2.7
694	COCCNC(=O)c1ccc(Nc2ncc3cc(-c4ccnc(C)c4)ccc3n2)cc1	3.56
695	CC(C)Cn1c(=O)n(C)c(=O)c2c(C(=O)N3C[C@H](O)CO3)c(Cc3c[nH]c4ncccc34)sc21	2.04
696	O=S(=O)(Nc1nc(-c2ccccc2)nn1Cc1ccccc1)c1ccccc1	1.25
697	COc1cc(N2CCN(CCO)CC2)ccc1Nc1ncc(Cl)c(-c2cnc3ccccn23)n1	3.2
698	NC1(c2ccc(-n3c(-c4ccccc4)nc4ccccc4c3=O)cc2)CCC1	1.6
699	CC(=O)c1ccc2c(c1)N(CCN1CCC(NCc3ccc4c(n3)NC(=O)CO4)CC1)C(=O)CO2	0.37
700	CCN(CC)CCOC(=O)c1ccc(N)cc1	0
701	Cc1ncc(-c2ccnc(Nc3ccc(S(=O)(=O)CC4CCCO4)cc3)n2)n1C(C)C	2.82
702	NC(Cc1cc(I)c(Oc2ccc(O)c(I)c2)c(I)c1)C(=O)O	0.97
703	O=C1C(=O)c2ccccc2-c2ccccc21	2.6
704	O=C(NCC12CC3CC(CC(C3)C1)C2)c1cc(CN2CCNCC2)ccc1Cl	1.84
705	Fc1ccc(-n2cc(C3CCNCC3)c3cc(Cl)ccc32)cc1	2.4
706	CS(=O)(=O)c1cccc(Nc2nccc(Nc3cccc4ccoc34)n2)c1	3.52
707	CC#Cc1ccnc(-c2cccc([C@@]3(c4cc(C)c(=O)n(CC)c4)N=C(N)c4c(F)cccc43)c2)c1	4.4
708	Cc1cccc(C)c1NC(=O)C(C)N	-0.15
709	NC1CCN(c2nccc(C(=O)NCC34CC5CC(CC(C5)C3)C4)c2Cl)CC1	1.19
710	COc1ccc(C(=O)N2CCC(C(=O)c3ccc(F)cc3)CC2)cc1	2.92
711	Cc1ccc(OC(=O)N2CCN3CCC2CC3)cc1	1.02
712	CC(=O)Nc1ccc2cnn(-c3cc(NC4CC4)n4ncc(C#N)c4n3)c2c1	3.44
713	CCN(CC)C(=O)c1ccc(C2=CC3(CCNCC3)Oc3ccccc32)c(O)c1	0.77
714	CN1CCOc2nc(C#Cc3ccccc3)ccc21	3.8
715	CCOC(=O)CN(c1ccccc1C)S(=O)(=O)c1ccc(Cl)cc1	4.03
716	CN[C@@H](C)C(=O)N[C@H](C(=O)N[C@H]1CCCN(C(=O)Cc2ccccc2)C1)C1CCCCC1	1.32
717	O=C(Nc1ccc(F)cc1)c1ccc(Cl)[n+]([O-])c1	1.38
718	N#Cc1ccc(Nc2nccc(NC3CC3)n2)cc1	3.01
719	N#Cc1cc(CN2CCC2)cnc1-c1ccc(C(=O)Nc2ccccc2N)cc1	1.22
720	C[C@@H]1CN(C(=O)OCC(F)F)CCN1c1ncc(OCc2ccncc2C#N)cn1	2.3
721	CN(C)CC(O)COc1ccc(Nc2nccc(N(CC#N)c3cc(Cl)ccc3Cl)n2)cc1	2.4
722	Cc1ccc(CO)cc1N(C)c1ccnc(Nc2cc(N3CCCC3)cc(N3CCOCC3)c2)n1	3.8
723	Cn1nc(C(C)(C)C)cc1NC(=O)Nc1ccc(Cl)cc1	3.97
724	Cn1cnc(-c2ccccc2)c1C#Cc1ccnc(N)n1	2.94
725	CNC(=O)c1cc(C(=O)c2ccc(Cl)cc2)c(Br)[nH]1	3.1
726	CN1CC(n2nccc2-c2cc(Cl)ccc2Oc2cc(F)c(S(=O)(=O)Nc3ncns3)cc2F)C1	1
727	N#Cc1ccc(-c2csc(Nc3ccc(O)cc3)n2)cc1	4.1
728	Cc1ccc(S(=O)(=O)c2ccccc2)cc1	2.74
729	COc1cc2ncc(C(N)=O)c(Nc3ccc(F)cc3F)c2cc1NCCN1CCCCC1	2.52
730	O=C(Nc1cccc(Cl)c1)c1ccccn1	3.4
731	CCC1=C(C)CN(C(=O)NCCc2ccc(S(=O)(=O)NC(=O)N[C@H]3CC[C@H](C)CC3)cc2)C1=O	1.73
732	O=C(c1ccc(-c2ccc(Cl)cc2)o1)N(Cc1ccccn1)c1ccc(N2CCNCC2)cc1	3
733	O=c1[nH]cnc2scc(-c3cccs3)c12	2.18
734	CC(C)n1c(=O)c2c(-c3cncn3C)n(Cc3ccnc4ccc(Cl)cc34)nc2n(CC2CC2)c1=O	4.02
735	N#CC1(NC(=O)[C@@H]2CCCC[C@H]2C(=O)N2CCN(c3nc4ncccc4s3)CC2)CC1	1.4
736	Nc1ccccc1NC(=O)c1ccc(-c2nccs2)cc1	2.3
737	CCN1CCOc2cc(COc3ccccc3)cnc21	3.7
738	Nc1ncc(-c2ccc(F)cc2)[nH]1	1.39
739	COc1ccc(-c2ccc3nc(N)sc3c2)cn1	3.2
740	COc1ccc(-c2ccnc(N)n2)cc1	2.08
741	N#CC1(NC(=O)[C@@H]2CCCC[C@H]2C(=O)N2CCc3[nH]c4ccccc4c3C2)CC1	2.66
742	NC(=O)NC(=O)C(Nc1ccc2c(c1)CCC2)c1ccccc1	3.3
743	COc1cc2nnc(C(N)=O)c(Nc3cccc(Cl)c3F)c2cc1N1CCN(C)CC1	2.35
744	CS(=O)(=O)Cc1cc(N2CCOCC2)nc(-c2cccc(CO)c2)n1	1
745	Cc1ccc2c(c1)c(-c1ccnc3c(C#N)cccc13)c(C)n2CC(=O)O	0.52
746	CCCSc1ccc2nc(NC(=O)OC)[nH]c2c1	3.24
747	c1ccc(Nc2ccnc3ccccc23)cc1	2.78
748	C[C@]12N[C@H](Cc3ccccc31)c1ccccc12	1.6
749	COc1cc(C(=O)NS(=O)(=O)c2ccccc2)ccc1Cn1ccc2ccc(C(=O)NCC3CCCC3)cc21	1.93
750	NC1=NN(c2cccc(C(F)(F)F)c2)CC1	2.55
751	O=c1[nH]c2c(O)ccc([C@@H](O)CNCCCOCCNCCc3cccc(Cl)c3)c2s1	-0.03
752	CC(C)(C(=O)Nc1nnc(C(=O)Nc2ccc(N3CCOCC3)cc2)o1)c1ccc(Cl)cc1	2.96
753	Cc1ccc(C(=O)N2CCC(C(=O)c3ccc(Cl)cc3)CC2)cc1	3.79
754	c1ccc(-c2nc3ccccc3[nH]2)nc1	2.5
755	CCN(CC)C(=O)c1ccc(C(=C2CCN(Cc3ccc(F)cc3)CC2)c2cccnc2)cc1	3.65
756	O=C(O)CO[C@@H]1c2ccccc2C[C@H]1NC(=O)c1cc2sc(Cl)c(Cl)c2[nH]1	1.38
757	COc1cc(CCc2cc(Nc3ccnc(NCc4ccccn4)n3)n[nH]2)cc(OC)c1	3.5
758	O=C(NS(=O)(=O)c1ccc(NCCSc2ccccc2)c([N+](=O)[O-])c1)c1ccc(N2CCNCC2)cc1	-0.04
759	Nc1nc(Nc2ccc3nc(-c4ccc(F)cc4)cc(N)c3c2)cc(-c2ccc(C(F)(F)F)cc2)n1	1.54
760	O=C(Nc1ncc(F)s1)[C@H](CC1CCOCC1)c1ccc(S(=O)(=O)C2CC2)cc1	3.19
761	N=C(N)SCc1ccc(Cl)c(Cl)c1	1.28
762	N#Cc1ccc(C(c2ccc(C#N)cc2)n2cncn2)cc1	1.7
763	COC[C@H](C)Oc1cc(O[C@@H](C)Cc2ccccc2)cc(C(=O)Nc2ccc(C(=O)O)cn2)c1	1.5
764	Oc1ncc(NCc2ccccc2)c(O)n1	0.82
765	COc1cc(-c2ccc(Nc3ccccc3C(=O)O)c(OC)c2)ccc1Nc1ccccc1C(=O)O	1.8
766	N#Cc1cccnc1-c1ccc(C(=O)Nc2ccccc2N)cc1	1.58
767	CN(C)CC1CCn2c(c(C3=C(c4cn(C)c5ccccc45)C(=O)NC3=O)c3ccccc32)C1	2.88
768	Cc1noc2cc(N3CCN(C(=O)[C@@H]4CCCC[C@H]4C(=O)NC4(C#N)CC4)[C@H](C)C3)ccc12	2.67
769	CN[C@@H](C)C(=O)N[C@H](C(=O)N[C@H]1CCN(Cc2ccccc2)C1)C1CCCCC1	1.49
770	COC(=O)[C@H](Cc1ccc([N+](=O)[O-])cc1)NC(=O)c1cccc2ccccc12	3.58
771	Cc1ncc(-c2ccnc(Nc3ccc(C(N)=O)cc3)n2)n1C(C)C	2.39
772	Cc1ccc(OCC(=O)O)c(-n2nc3ccccc3n2)c1	-0.84
773	Cc1ccc(-c2ccc3c(ccc4sc5c(c43)NC[C@@H](C)NC5=O)n2)cn1	3.6
774	c1ccc(Nc2ccccc2)cc1	3.2
775	CSCCC(NC(=O)c1ccccc1)c1nc2ccccc2n1Cc1ccc(C#N)cc1	4.24
776	C[C@@H]1CN(C(=O)OC(C)(C)C)CCN1c1ncc(OCc2ccncc2C#N)cn1	3.33
777	Oc1cccc2ccccc12	2.5
778	CCN1CCN(C(=O)c2cc3cc(Cl)ccc3[nH]2)CC1	3.14
779	COc1cccc2c1c(NS(=O)(=O)c1ccc(Cl)s1)nn2Cc1cccc(CNC(=O)[C@@H]2COCCN2)c1	1.61
780	COc1ccc2c(c1)cc(C(=O)O)n2Cc1ccc(Cl)c(Cl)c1	1.66
781	NC(=O)c1cccc(O[C@@H]2C[C@@H]3CC[C@H](C2)N3Cc2ccccc2)c1	1.61
782	C[C@H](N)C(=O)N[C@H](/C=C/S(=O)(=O)c1ccccc1)CCc1ccccc1	1.66
783	CN1CCNc2nc(CCOc3ccc(C[C@H](NC(=O)c4c(Cl)cccc4Cl)C(=O)O)cc3)ccc21	0.07
784	c1ccc(CSc2nc3cccnc3[nH]2)cc1	3.22
785	CCN(CC)CCNC(=O)c1ccc(N)cc1	-0.92
786	COc1ccc(C(=O)Nc2cc(NC(=O)c3cccc(N(C)C)c3)ccc2Br)cc1OC	3.49
787	NC(=O)c1cccc(O[C@H]2C[C@@H]3CC[C@H](C2)N3CC2CC2)c1	0.07
788	Cc1cc(COC(=O)Nc2ccc(-c3ccccc3)n(CC(=O)NC(C(=O)C(F)(F)F)C(C)C)c2=O)cc(C)n1	2.38
789	COCCCNS(=O)(=O)c1ccc(Nc2nccc(-c3cnc4ccccn34)n2)cc1	3.41
790	N#CC1(NC(=O)[C@@H]2CCCC[C@H]2C(=O)N2CCc3[nH]c4c(C(F)(F)F)cccc4c3C2)CC1	3.75
791	O=C(N[C@@H](Cc1ccc(OCCNc2nc3ccccc3[nH]2)cc1)C(=O)O)c1c(Cl)cccc1Cl	0.6
792	COc1nc(N)nc2c1ncn2[C@@H]1O[C@H](CO)[C@@H](O)[C@H]1O	-0.58
793	C[C@@H]1NC(C)(C)CO[C@@]1(O)c1cccc(Cl)c1	1.69
794	CN1CCN(C(=O)[C@@H]2CCCC[C@H]2C(=O)NCC#N)CC1	-0.1
795	Fc1ccc(C2CC=CCNC2)cc1Cl	1.33
796	O=S(=O)(NCC(c1ccccc1)N1CCCCCC1)c1cc(Cl)cc(Cl)c1	3.36
797	C[C@@H](NC(=O)c1cccnc1Oc1ccccc1)c1ccccc1	3.14
798	Cc1cn([C@H]2CCCN(S(=O)(=O)c3ccc(O)c(Oc4ccc(Cl)cc4)c3)C2)c(=O)[nH]c1=O	2.12
799	CN[C@@H](C)C(=O)N[C@H](C(=O)N[C@H]1CCCN(CCc2ccc(OC)cc2)C1)C(C)(C)C	1.45
800	COC(=O)COc1ccc(O)cc1	0.92
801	C(=C/c1nn[nH]n1)\c1ccccc1	-0.4
802	CN(C)CCC=C1c2ccccc2C=Cc2ccccc21	2.83
803	O=C(NCCCCCCNCCc1ccc(O)c2nc(O)sc12)Nc1ccccc1	1.26
804	COc1ccccc1S(=O)(=O)NC(=O)N1CCC(N2CCC(Oc3ccc(Cl)c(Cl)c3)CC2)CC1	0.89
805	CC1(C)Cc2c(-c3ccccc3)c(-c3ccc(Cl)cc3)c(CC(=O)O)n2C1	3.07
806	CC(C)Cn1c(=O)n(C)c(=O)c2c(C(=O)N3CC[C@@H](O)C3)c(Oc3cccc4ccccc34)sc21	2.87
807	O=C(Nc1ccccc1)c1ccc(OCCCN2CCCC2)cc1OCc1ccccc1F	3.85
808	CCC(=O)NCC[C@@H]1CCc2ccc3c(c21)CCO3	2.57
809	CN(CCOc1ccc(CC2SC(=O)NC2=O)cc1)c1ccccn1	2.5
810	O=C(Cc1ccc(O)cc1)c1ccc(O)cc1O	2.54
811	Cc1cn([C@H]2CCCN([C@H](C)c3ccc(C(=O)O)c(Oc4cccc(Cl)c4)c3)C2)c(=O)[nH]c1=O	-0.3
812	CC(=O)NC[C@H]1CN(c2ccc(-n3ccc(C#N)c3)c(F)c2)C(=O)O1	1.6
813	CS(=O)(=O)C1(c2cc(N3CCOCC3)nc(-c3ccccc3)n2)CC1	2.6
814	COc1ccc2ncc(=O)n(CCN3CC[C@H](NCc4ccc5c(n4)NC(=O)CO5)[C@H](O)C3)c2c1	0.39
815	O=S(=O)(Nc1nnc(-c2ccccc2)s1)c1ccc(Cl)cc1	1.14
816	Cn1sc(=O)c2cc(S(=O)(=O)NC3CC3)ccc21	1.3
817	COc1ccc(-c2cc(NC(=O)Cc3ccc4ccccc4c3)[nH]n2)cc1OC	3.1
818	CN(C(=O)Cc1ccc(-n2cnnn2)cc1)[C@@H]1CCN(Cc2ccc(C(F)(F)F)nc2)C[C@@H]1F	1.8
819	COc1cc2nc(N3CCN(C(=O)C4CCCO4)CC3)nc(N)c2cc1OC	0.9
820	Cc1nc(N2CCN(c3ncc(OCc4ccncc4C#N)cn3)[C@H](C)C2)no1	2.6
821	CCCc1c(OCc2ccc(C(=O)O)cc2)ccc(C(C)=O)c1O	2.1
822	O=C(NO)c1ccc(NS(=O)(=O)c2ccccc2)cc1	0.75
823	CN1CCCCC1CCN1c2ccccc2Sc2ccc([S+](C)[O-])cc21	1.6
824	Nc1ccnc(-c2cccnc2)n1	0.44
825	Cc1nc(C)c(-c2ccc([C@H]3CC[C@H](CC(N)=O)CC3)cc2)nc1C(N)=O	2.7
826	O=c1[nH]n(C(c2ccccn2)C2CCCC2)c(=O)c2c(O)c3ccc(Cl)cc3nc12	1.9
827	Cc1cccc(NS(=O)(=O)c2ccc(-c3ccc(C#N)cc3)cc2)n1	2.42
828	C[C@@H](Oc1cc(-c2cnn(C3CCNCC3)c2)cnc1N)c1c(Cl)ccc(F)c1Cl	2.33
829	Cc1ccccc1C(=O)NCC12CC3CC(CC(C3)C1)C2	4.28
830	CN1CCN(C(=O)c2ccc(C(=C3CCN(Cc4cscn4)CC3)c3cccc4cccnc34)cc2)CC1	1.98
831	CC1(C)N=C(N)N=C(N)N1c1ccc(Oc2ccc(Cl)cc2)c(Cl)c1	0.79
832	COc1ccc(-n2cnc3cc(NS(=O)(=O)c4ccccc4)ccc32)cc1	3.7
833	O=C(O)c1ccccc1CN1CCC(CN2CCC(Oc3ccc(Cl)c(Cl)c3)CC2)CC1	2.48
834	CNc1nc(C)c(-c2nc(Nc3cccc(N4CCCN(C(C)=O)CC4)c3)ncc2C#N)s1	3.2
835	Fc1cc(-c2cccc3ncc(-c4cnn(C5CCNCC5)c4)nc23)cc(F)c1CN1CCOCC1	1.86
836	CCC(c1nc2ccsc2c(=O)n1Cc1cccnc1)N(CCCN)C(=O)c1ccc(C)cc1	0.01
837	O=C(O)c1cc2cc(OCc3ccccc3)ccc2[nH]1	0.4
838	O=C(O)c1ccccc1C(=O)N1CCC(N2CCC(Oc3ccc(Cl)c(Cl)c3)CC2)CC1	1.73
839	Cc1nc(-c2ccc(C)c(NC(=O)c3ccc(OCc4ccccn4)cc3)c2)c[nH]1	2.97
840	CCc1c(C)nc(SCC(=O)Nc2nc(-c3ccc(OC)cc3)cs2)nc1O	3.78
841	CO[C@H]1CN(CCn2c(=O)ccc3ccc(C#N)cc32)CC[C@H]1NCc1cc2c(cn1)OCCO2	0.63
842	Nc1cc(C(F)(F)F)c(-c2cc(N3CCOCC3)nc(N3CCOCC3)n2)cn1	2.7
843	O=C(O)CCc1ccc(OCc2cc(Cl)ccc2-c2ccccc2)cc1	3.22
844	COc1ccc2c3c1OC1C(O)C=CC4C(C2)N(C)CCC341	0.8
845	C[C@H](NC(=O)Cc1cc(F)cc(F)c1)C(=O)NC1C(=O)N(C)c2ccccc2-c2ccccc21	3.6
846	C[C@H](NC(=O)c1cccc2c1N(Cc1ccc(Cl)cc1)CC2)c1ccc(C(=O)O)cc1	1.47
847	CC(=O)Nc1cccc(Nc2ncnc(N3CCC(OCc4ccc(OC(F)(F)F)cc4)CC3)n2)c1C	4.4
848	CC(O)(C(=O)Nc1ccc(S(=O)(=O)c2ccc(F)cc2)cc1)C(F)(F)F	3.12
849	Cc1sc2c(c1C)C(c1ccc(Cl)cc1)=N[C@@H](CC(=O)OC(C)(C)C)c1nnc(C)n1-2	3.82
850	CSc1ccc(OCc2ccccc2)c(C(=O)Nc2ccc(C(=O)O)cn2)c1	1.6
851	Oc1ccc(-c2nc3ccccc3s2)cc1	4.1
852	COc1cc(Nc2nc(N[C@@H](C)c3ncc(F)cn3)nc(N3CCOCC3)c2Cl)n[nH]1	2.85
853	O=C(NNc1cccc(Cl)c1)c1cccnc1Cl	1.87
854	Cc1ccc(NC(=O)CCC2CCCCC2)cc1NC(=O)c1ccc(O)cc1	4.13
855	Nc1cccc2c1-c1ccccc1C(=O)C2=O	2.31
856	COc1ccc2cc(C(C)C(=O)O)ccc2c1	0.23
857	c1ccc(C2Cc3ccccc3CN2)cc1	1.9
858	CCN(CC)S(=O)(=O)c1ccc(-c2cc(C(F)(F)F)ccc2OCC(=O)O)cc1	0.67
859	CN(C)CCOC(C)(c1ccccc1)c1ccccn1	-0.2
860	NCCc1ccc(O)c2nc(O)sc12	0.33
861	COc1ccc(C(=O)Nc2c(Cl)cncc2Cl)c2cccnc12	2.09
862	C#CCN(c1ccnc(Nc2ccc(OCC(O)CN(C)C)cc2)n1)c1cc(Cl)ccc1Cl	3.2
863	COc1ccc(Cl)cc1C(=O)NCCc1ccc(S(=O)(=O)NC(=O)NC2CCCCC2)cc1	2.23
864	O=C(CO)N1CCC[C@@H]1COc1cccc2ncnc(Nc3ccc(OCc4ccccn4)c(Cl)c3)c12	3.71
865	CCN(CC)C(C)C(=O)c1ccccc1	1.18
866	CCCN(CCC)C(=O)c1cccc(C(=O)N[C@@H](Cc2ccccc2)[C@H](O)CNCc2cccc(OC)c2)c1	2.7
867	FC(F)(F)c1cc(COCC(c2cccc(Cl)c2)N2CCNCC2)cc(C(F)(F)F)c1	4.2
868	COc1cc2ncnc(Nc3cc(NC(=O)c4cccc(N(C)C)c4)ccc3Cl)c2cc1OC	4.26
869	C[C@H]1O[C@@H](n2cnc3c(N)nc(OCC45CC6CC(CC(C6)C4)C5)nc32)[C@H](O)[C@@H]1O	3.58
870	Cc1cnc(Nc2nc(N[C@@H](C)c3ncc(F)cn3)nc(N3CCOCC3)c2F)s1	3.27
871	CC(C)NCC(O)COc1nccs1	-0.97
872	C=CCc1ccccc1OCC(O)CNC(C)C	0.99
873	CC(=O)Nc1ccc2c(c1)c(-c1cc(NC3CC3)n3ncc(C#N)c3n1)cn2CCO	2.71
874	O=C(O)c1ccccc1O	-1.36
875	Cn1cnc(-c2ccccc2)c1-c1cc2c(N)ncnc2s1	2.94
876	CCCCNC(=O)NS(=O)(=O)c1ccc(C)cc1	0.44
877	Cc1cn([C@H]2CCCN([C@H](CC(C)C)c3ccc(C(=O)O)c(Oc4cccc(Cl)c4)c3)C2)c(=O)[nH]c1=O	0.91
878	COc1ccc(Cl)c(Nc2ncnc3cc(OC)cc(OC4CCN(C)CC4)c23)c1	3.6
879	CCOC(=O)c1ccc(OCCC2CCN(c3ccc(C)nn3)CC2)nc1	3.76
880	Cc1ccc2nc(CCNCCCO)ccc2c1NC(=O)CC12CC3CC(CC(C3)C1)C2	1.18
881	CCN(C(=O)Cc1ccc(S(C)(=O)=O)cc1)C1CCN(CCC(c2ccccc2)c2ccc(C#N)cc2)CC1	2.76
882	Cc1cnc(Nc2ccc(OCC(O)CN(C)C)cc2)nc1Nc1ccccc1	2
883	CCCSc1nc(N2CCCC(C(=O)O)C2)ccc1C(=O)NC1CCCCC1	1.72
884	C[C@@H]1CCCN1CCc1cc2cc(-c3ccc(C#N)cc3)ccc2o1	3.51
885	O=S(=O)(NCC(c1ccccc1)N1CCCCCC1)c1ccc(Br)cc1	3.21
886	O=C(CCc1ccccc1O)Nc1ccccc1	2.71
887	CC1=C2C[C@H]3[C@@H](CC=C4C[C@@H](O)CC[C@@]43C)[C@@H]2CC[C@]12O[C@@H]1C[C@H](C)CN[C@H]1[C@H]2C	2.63
888	NC(=O)N1c2ccccc2C[C@H](O)c2ccccc21	0.79
889	Fc1ccc(C2CCN(C(=S)COCc3ccncc3)CC2)c(Cl)c1	4.23
890	COc1ncnc(NS(=O)(=O)c2ccc(N)cc2)c1OC	-0.73
891	C[C@H]1CCCN1CCc1cc2cc(-c3ccc(C#N)cc3)ccc2o1	3.25
892	COc1cc(Nc2nc(N[C@@H](C)c3ncc(F)cn3)ncc2Cl)n[nH]1	2.53
893	CCN1CCN(C(=O)c2cc3cc(F)ccc3[nH]2)CC1	2.28
894	CC(C)C[C@H](CO)Nc1nc(SCc2ccccc2)nc2nc(N)sc12	4.2
895	CN1CCC[C@@H]1CCO[C@](C)(c1ccccc1)c1ccc(Cl)cc1	3.48
896	O=C(N[C@H]1CN2CCC1CC2)c1ccc(-c2ccccc2)s1	1.9
897	CC(NCC(O)c1ccc([N+](=O)[O-])cc1)C12CC3CC(CC(C3)C1)C2	3.53
898	Cc1ccc(Oc2cccc(CN3CCCC(n4cc(C)c(=O)[nH]c4=O)C3)c2)cc1	3.38
899	CCCN(CCNCCc1ccc(O)c2[nH]c(=O)sc12)C(=O)CCOCCc1ccccc1	2.23
900	O=c1nc(NCc2ccccc2)sn1Cc1ccccc1	3.01
901	CN(CCO)C(=O)c1ccc([C@H](c2cccc(NC(=O)C3CC3)c2)N2CCN(Cc3ccc(F)cc3)CC2)cc1	3.38
902	Cc1ccc(NC(=O)c2ccnc(N3CCOCC3)c2)cc1Nc1ccnc(OCC2CCCN(C)C2)n1	1.9
903	CN(C)CCCN(C)S(=O)(=O)c1ccc(Nc2nccc(-c3cnc4ccccn34)n2)cc1	2.16
904	CCCSc1ncccc1C(=O)N(C)[C@@H]1[C@H]2CC3C[C@@H]1C[C@](O)(C3)C2	2.48
905	O=S(=O)(Cc1c(F)cccc1F)N1CCN(c2ncccc2C(F)(F)F)CC1	3.9
906	CS(=O)(=O)c1ccc(-c2cc(C(=O)N[C@H]3CCCNC3)c(NC(N)=O)s2)cc1	0.68
907	Cc1onc(C(N)=O)c1C(=O)Nc1nccs1	1.63
908	CCn1cnc(-c2ccccc2)c1-c1nc2c(N)ncnc2s1	2.97
909	CCCc1c(OCCCCSCC(=O)O)ccc(C(C)=O)c1O	1.3
910	CCc1nc2cc(O)ccc2c(Oc2ccc(/C=C/C(=O)O)cc2)c1-c1ccccc1	3
911	Cc1ccc(C(NC(=O)c2ccccc2O)C(=O)Nc2c(C)cccc2C)s1	4.05
912	COCCOc1nc(N)c2[nH]c(=O)n(Cc3cccc(CC(=O)OC)c3)c2n1	1.86
913	C[S+]([O-])c1ccc(-c2nc(-c3ccc(F)cc3)c(-c3ccncc3)[nH]2)cc1	3.34
914	CCC(CC)n1nc(C)c(C(=O)N[C@@H](C)C(C)(C)C)c1NS(=O)(=O)c1ccc(C)cc1	1.88
915	N#Cc1ccc(C(=O)N2CCC3(CC2)N=C(N)c2c(F)ccc(F)c2N3)cn1	0.79
916	CC(=O)NC[C@H]1CN(c2ccc(N3Cc4cccnc4C3)c(F)c2)C(=O)O1	2.88
917	CC[C@H](NC(=O)c1c([S+](C)[O-])c(-c2ccccc2)nc2ccccc12)c1cccnc1	2.2
918	CC(C)Oc1cc(-n2cnc3ccc(N[C@@H](CO)c4ccc(F)cn4)nc32)n[nH]1	2.79
919	NC(=O)c1cnc2[nH]c(-c3ccc(OCCN4CCCCC4)cc3)nc2c1NCCCNC(=O)C1CCC1	2.48
920	CNC(=O)OC[C@@H](C)N(c1cc(Cl)ccc1CO)S(=O)(=O)c1ccc(Cl)cc1	3
921	Cc1ncc(-c2ccnc(Nc3ccc(C(=O)NCCN(C)C)c(F)c3)n2)n1C(C)C	1.96
922	CC1(C(=O)NC2CCCCC2)CCC(=O)N1Cc1cccs1	2.15
923	COc1cc(N2CCN(C(N)=O)CC2)ccc1Nc1ncc(Cl)c(-c2cnc3ccccn23)n1	3.3
924	NC(=O)c1cccc([S+]([O-])[C@@H]2C[C@@H]3CC[C@H](C2)N3Cc2ccccc2)c1	1.1
925	CN(C)c1nc(Cc2ccc(NC(=O)c3ccc(C(F)(F)F)cc3)cc2)nc(N(C)C)c1CC(=O)O	1.46
926	CCC(CC)NC(=O)c1nnn(-c2ccccc2)c1NS(=O)(=O)c1ccc(C)cc1	0.46
927	Nc1nc(SCc2ccccc2)nc2c1ncn2[C@@H]1O[C@H](CO)[C@@H](O)[C@H]1O	1.24
928	Cn1c(=O)c2nc(-c3cccnc3)[nH]c2n(C)c1=O	0.7
929	CO[C@@H]1CN(Cc2ccc(C(F)(F)F)cc2)CC[C@@H]1N(C)C(=O)Cc1ccc(-n2cnnn2)cc1	3.1
930	COc1ccc2cc([C@H](C)C(=O)O)ccc2c1	0.13
931	Cc1c(N(C)C)c(=O)n(-c2ccccc2)n1C	0.78
932	NC(=O)c1cncc(-c2ccc([C@H]3CC[C@H](CC(=O)O)CC3)cc2)c1	0.22
933	CC(C(=O)O)c1ccc(-c2ccccc2)c(F)c1	0.85
934	COc1cc(N2CCN(C(C)=O)CC2)ccc1Nc1ncc(C(F)(F)F)c(-c2cnc3ccccn23)n1	3.7
935	COC[C@H](C)Oc1cc(Oc2cc(F)cc(F)c2)cc(C(=O)Nc2ccc(C(=O)O)cn2)c1	1.36
936	Fc1cccc(C(COCc2cc(C(F)(F)F)cc(C(F)(F)F)c2)N2CCNCC2)c1	3.2
937	COc1cc(F)ccc1-c1cncc(CNC(=O)c2ccccn2)c1	3.2
938	CSCc1cc(N2CCOCC2)nc(-c2ccccc2)n1	3.26
939	CC(=O)Nc1ccc2ccn(-c3cc(NCCCN(C)C)n4ncc(C#N)c4n3)c2c1	1.62
940	CC(=O)Nc1ccc2ccn(-c3cc(NCCN4CCCC4)n4ncc(C#N)c4n3)c2c1	2.24
941	N#CC1(NC(=O)[C@@H]2CCCC[C@H]2C(=O)N2CCc3[nH]c4c(Cl)cccc4c3C2)CC1	3.59
942	Nc1ccc2[nH]c(Cc3ccc(Oc4ccccc4)cc3)nc2c1	3.8
943	Cn1c(=O)c(Oc2ccc(F)cc2F)cc2cnc(NC(CCO)CCO)nc21	1.5
944	CCc1ccc(NC(=O)c2ccc3cc(C(=N)N)ccc3c2)cc1	1.1
945	CC#Cc1ccnc(-c2cc(C3(C4CC4)N=C(C)C(N)=N3)ccc2O)c1	3.6
946	COc1cc(N2CCN(C(C)=O)CC2)ccc1Nc1ncc(C)c(-c2cnc3ccccn23)n1	2.9
947	Nc1cccc2c1C(=O)N(Cc1cccc(Cl)c1)C2=O	3.18
948	Nc1nc(Cl)nc(NCc2ccccc2)n1	2.26
949	COc1cccc(COCC(O)CN2CCC(C(N)=O)CC2)c1	-0.5
950	Clc1ccc2ncc(-c3cccc(NC4CNC4)n3)n2c1	1.19
951	N=C(N)Nc1ccc(C(=O)Oc2ccccc2)cc1	-0.21
952	NC1(c2ccc(-c3nn4ccc(=O)nc4cc3-c3ccccc3)cc2)CCC1	0.2
953	CCOc1ccc(NC(C)=O)cc1	1.5
954	O=C(CC12CC3CC(CC(C3)C1)C2)Nc1ccc2[nH]ncc2c1	4.03
955	Cc1ccc(-c2ccc(S(=O)(=O)N3CCC[C@H]3C(=O)N3CC[C@@H](N)C3)cc2F)o1	1.2
956	Cc1cc([C@H](O)[C@](C)(OCc2ccc(-c3ccccc3)cc2)C(=O)NO)no1	2.88
957	CC(C)Oc1cc(Nc2nc3c(cc2F)ncn3[C@@H](CO)c2ccc(F)cn2)n[nH]1	2.97
958	O=C(O)c1cccc(-c2ccc3c(C(=O)NCC45CC6CC(CC(C6)C4)C5)c(Cl)ccc3n2)c1	2.84
959	Nc1nc(N)c(C(=O)Nc2ccccn2)nc1Cl	2.67
960	CC1CN(C(=O)c2nnc3c(-c4ncccn4)cccc3c2N)C1	1.21
961	OC[C@H](Nc1ncc(Cl)c(Nc2cc(C3CC3)[nH]n2)n1)c1ccc(F)cc1	3.75
962	C[C@H]1COCCN1c1cc(CS(C)(=O)=O)nc(-c2ccc3[nH]ccc3c2)n1	2.38
963	COCCCc1cc(Nc2nc(NCc3cc(C)no3)ncc2Br)n[nH]1	3.07
964	O=C(O)CNCCNc1ccc(Cl)c(C(=O)NCC23CC4CC(CC(C4)C2)C3)c1	1.94
965	COc1cc(N2CCN(C(=O)[C@@H]3CCCC[C@H]3C(=O)NC3(C#N)CC3)[C@H](C)C2)ccc1C1CC1	3.49
966	CCNC(=O)c1ccc(C)c(-n2cnc3ccc(N4CCN(C)CC4)cc3c2=O)c1	1.47
967	O=C(Nc1nc(-c2ccccc2)cs1)c1cccnc1	3.62
968	CS(=O)(=O)n1c2ccccc2c2cc(NC(=O)CCc3ccncc3)ccc21	3.4
969	C[C@@H]1CN(C(=O)OCC(F)(F)F)CCN1c1ncc(OCc2ccncc2C#N)cn1	3
970	Nc1nnc(Cc2ccc(Cl)cc2)s1	2.34
971	N#Cc1c(C(=O)O)n(Cc2ccc(Cl)c(Cl)c2)c2ccccc12	1.26
972	OCC[C@@]1(c2ccc(Cl)c(Cl)c2)CCCNC1	0.62
973	C=CCN(C(=O)Nc1ccccc1)C1CCN(CCC(c2ccccc2)c2ccccc2)CC1	3.6
974	Cc1nn(-c2ccc(F)cc2)c(NS(=O)(=O)c2ccc(C#N)cc2)c1C(=O)N[C@@H](C)C(C)(C)C	0.45
975	O=C(O)[C@H](Cc1ccc(F)cc1)N1CCC(CN2CCC(Oc3ccc(Cl)c(Cl)c3)CC2)CC1	2.98
976	CS(=O)(=O)c1cccc(Nc2nccc(Nc3cccc4ncoc34)n2)c1	2.5
977	C[C@@H]1CN(C(=O)OC(C)(C)C)CCN1c1ncc(OCc2ccc(C#N)cc2)cn1	2.89
978	Cc1ncc(-c2ccnc(Nc3ccc(N4CCN(S(=O)(=O)CCN(C)C)CC4)cc3)n2)n1C(C)C	2.52
979	Nc1ccc2ccccc2n1	1.7
980	CCCCN1Cc2c(nc3cc(-c4ccco4)nn3c2O)C1=O	0.8
981	Cn1cc(C(=O)NC[C@@H](O)CN2CCC(Oc3ccc(Cl)c(Cl)c3)CC2)c(C(F)(F)F)cc1=O	2.76
982	Nc1nc2ccc(-c3cccc(O)c3)cc2s1	3.1
983	CC#CCn1c(=O)c2c(-c3cncn3C)n(Cc3ccnc4ccc(Cl)cc34)nc2n(CC2CC2)c1=O	3.61
984	Cc1nn(C)c2cc(N3CCN(C(=O)[C@@H]4CCCC[C@H]4C(=O)NC4(C#N)CC4)[C@H](C)C3)ccc12	2.7
985	Cc1nccc(-c2ccc(-c3nc4ccncc4c(O)c3C#N)cc2)c1Cl	2
986	COc1ncc2ccc(=O)n(CCN3CCC(NCc4cc5c(cn4)OCCO5)CC3)c2n1	0.2
987	COc1cc(C(=O)O)ccc1Cc1cn(C)c2ccc(NC(=O)CC3CCCC3)cc12	2
988	Cc1c(S(=O)(=O)c2ccc(Cl)cc2)c2cc(F)ccc2n1CC(=O)O	-0.16
989	CCC(C)(CC)C[C@H](c1ccc(C(=O)O)c(Oc2cccc(Br)c2)c1)N1CCC[C@H](n2cc(C)c(=O)[nH]c2=O)C1	1.97
990	CC1(C)[C@@H]2CC[C@@]1(CS(=O)(=O)N1CCN(c3ccc(C#N)cn3)CC1)C(=O)C2	2.46
991	Cc1nc2ncnn2c(O)c1CCOC(=O)c1ccccc1F	0.99
992	N#Cc1cccc(S(=O)(=O)NC[C@@H](O)CN2CCC(Oc3ccc(Cl)c(Cl)c3)CC2)c1	3.42
993	O=C(NCCCCc1ccccc1)c1ccccc1	3.8
994	CC(C)C[C@H](NC(=O)N1CCOCC1)C(=O)NCC#N	0.08
995	NC(=O)C1CCCCC1	0.9
996	CN(C)c1ncnc2nc[nH]c12	0.95
997	Nc1nonc1/C(=N/O)Nc1ccc(F)c(Cl)c1	2.7
998	COc1ccc(S(=O)(=O)Nc2ccccn2)cc1	0.87
999	Cc1ccc(-c2csc3ncnc(O)c23)cc1	2.59
1000	CCOc1ccccc1-c1ccc(-c2nc3ccncc3c(O)c2C#N)cc1	3
1001	C=CC(=O)Nc1ccc(OC)cc1	1.68
1002	Cc1cn([C@H]2CCCN(S(=O)(=O)c3ccc(O)c(Oc4cccc(Br)c4)c3)C2)c(=O)[nH]c1=O	2.3
1003	CS(=O)(=O)c1ccc2c(C(=O)NC[C@@H](O)CN3CCC(Oc4ccc(Cl)c(Cl)c4)CC3)c[nH]c(=O)c2c1	2.63
1004	CN1CCC[C@H]1c1ccccn1	0.44
1005	CC[C@H](Nc1ncnc2[nH]cnc12)c1nc2cccc(F)c2c(=O)n1-c1ccccc1	2.72
1006	Cn1c(Nc2ccc(C(F)(F)F)cc2)nc2cc(Oc3ccnc(-c4ncc(C(F)(F)F)[nH]4)c3)ccc21	3.45
1007	Nc1nc(-c2ccccc2)ns1	2.2
1008	N#C/C(=C(\N)Sc1ccc(N)cc1)c1ccccc1C(F)(F)F	3.4
1009	Cc1cc(C)nc(SCC(=O)Nc2cc(C)on2)n1	1.52
1010	CNC1=Nc2ncccc2C(c2ccco2)=NC1c1ccns1	1.44
1011	Cn1c(=O)c2c(ncn2CC(O)CO)n(C)c1=O	-1.25
1012	CN1C(=O)CC(C)(CCc2cccc(-c3ccccc3)c2)N=C1N	2.03
1013	Cc1ccc(-c2nn(C(C)(C)C)c3ncnc(N)c23)cc1	4.1
1014	COc1cc2ncnc(Nc3cccc(Cl)c3F)c2cc1OC1CCN(CC(N)=O)CC1	3.1
1015	NC(=O)c1ccc(Br)cc1	1.75
1016	c1nc(N2CCCCC2)c2nc[nH]c2n1	1.84
1017	CCOc1cccc(Nc2nnc(C(=O)Nc3ccc(N4CCOCC4)nc3)o2)c1	3.6
1018	Cc1nc(C(=O)[C@H](C)Oc2ccc(SCCCCCc3ccccc3)cc2)sc1CCCC(=O)O	2.03
1019	O=C(Nc1cccc([C@@H](c2ccc(C(=O)N3CCC3)cc2)N2CCN(Cc3ccc(F)cc3)CC2)c1)C1CC1	3.58
1020	N[C@H](Cc1c[nH]c2ccccc12)C(=O)O	-0.92
1021	Cc1ccc(S(=O)(=O)Nc2c(C(=O)N[C@@H](C)C(C)(C)C)c(C)nn2C2CCC2)cc1	1.57
1022	O=c1[nH]n(Cc2cccs2)c(=O)c2c(=O)c3ccc(Cl)cc3[nH]c12	1.52
1023	N#Cc1ccc(C(=O)Nc2ccc(-n3ccnc3)nc2)cc1	2.2
1024	Nc1[nH]ncc1S(=O)(=O)c1ccccc1	1.1
1025	CS(=O)(=O)Cc1cc(N2CCOCC2)nc(-c2cccc3[nH]ccc23)n1	1.7
1026	C[C@H]1O[C@@H](n2cnc3c(N)nc(OCC4CCC(F)(F)CC4)nc32)[C@H](O)[C@@H]1O	1.72
1027	CCn1c2ccccc2c2cc(NC(=O)CCc3ccncc3)ccc21	3.75
1028	CCS(=O)(=O)c1ccc(-c2cc(Cl)ccc2OCC(=O)O)c(C(F)(F)F)c1	0.62
1029	COc1ccccc1C[C@@H](C(=O)O)N1CCC(CN2CCC(Oc3ccc(Cl)c(Cl)c3)CC2)CC1	2.77
1030	COc1cc2nnc(C(N)=O)c(Nc3ccc(F)cc3F)c2cc1N1CCN(C)CC1	2.36
1031	Fc1ccc2cn[nH]c2c1	2.3
1032	CC(C)N(CCCNC(=O)Nc1ccc(C(C)(C)C)cc1)C[C@H]1O[C@@H](n2ccc3c(N)ncnc32)[C@H](O)[C@@H]1O	2.4
1033	CCC1(c2ccc(N)cc2)CCC(=O)NC1=O	0.6
1034	N#Cc1ccc(C(=O)N2CCC3(CC2)N=C(N)c2c(F)cccc2N3)cc1	0.66
1035	Cc1ccc(C(=O)NC2CC2)cc1-c1ccc(C(=O)NCC2CC2)nc1	3.36
1036	CC(C)N=c1cc2n(-c3ccc(Cl)cc3)c3ccccc3nc-2cc1Nc1ccc(Cl)cc1	3.17
1037	COc1ccc2ncc(=O)n(CCN3CC[C@@H](NCc4ccc5c(n4)NC(=O)CO5)[C@H](OC)C3)c2c1	0.97
1038	Oc1cc(OCc2ccccc2)ccn1	1.69
1039	COc1cc2ncnc(Nc3ccncc3)c2cc1OC	2.22
1040	c1ccc(Nc2[nH]nnc2-c2ccccc2)cc1	3.37
1041	N#CC1(NC(=O)[C@@H]2CCCC[C@H]2C(=O)N2CCN(c3nc4cnccc4s3)CC2)CC1	1.66
1042	O=c1[nH]c2c(O)ccc([C@@H](O)CNCCc3ccc(CNCCc4ccccc4)cc3)c2s1	1.11
1043	NS(=O)(=O)c1cc(Cl)c(Cl)c(S(N)(=O)=O)c1	0.92
1044	Fc1ccc(-c2cn3ccccc3n2)cc1	3.1
1045	O=C1CCC(=O)N1c1cc(Cc2n[nH]c(=O)c3ccccc23)ccc1F	1
1046	N#Cc1cccc(C(=O)Nc2cc(-c3ccccc3)nn2-c2ccccc2)c1	3.82
1047	CN(C)c1cccc2c(S(=O)(=O)N(C)CC(=O)O)cccc12	-1.45
1048	Cc1cc(-c2ccc(N3C[C@H](Cn4ccnn4)OC3=O)cc2F)on1	1.99
1049	CCC(=O)N[C@H]1CC[C@@H](C(=O)N(C)c2ccc(-c3nc4ccccc4o3)cc2)C1	3.4
1050	Nc1c(C(=O)c2cccc(OC[C@H](O)CO)c2)cnn1-c1ccc(F)cc1	1.94
1051	O=c1cc(N2CCOCC2)nc2n(Cc3cccc4ccccc34)ccn12	3.3
1052	COc1cc2ncnc(Nc3ccc(F)c(Cl)c3)c2cc1OCCN1CCN(C)CC1	3.3
1053	O=C1NCCc2[nH]c(-c3ccncc3)cc21	1.49
1054	CCN(C(=O)Cc1ccc(S(C)(=O)=O)cc1)C1CCN(CCC(c2ccccc2)c2ccccc2)CC1	3
1055	COc1cc(-n2cnc3cc(-c4ccc(Cl)cc4)sc3c2=O)ccc1OCCN1CCCC1	2.74
1056	CN(C)c1ccnc2sc3c(=O)n(-c4ccccc4)cnc3c12	2.34
1057	CN1CCc2c1nc1ccccc1c2NC(=O)Cc1ccccc1	2.8
1058	Cc1c[nH]c(/C=C2\C(=O)Nc3ccccc32)c1CCC(=O)O	1.2
1059	COc1ccc(Nc2nccc(-c3cnc(C)n3C(C)C)n2)cc1	3.43
1060	Cc1cc(Nc2nc(O[C@@H](C)c3ncc(F)cn3)ncc2Cl)n[nH]1	1.82
1061	O=C(NCC12CC3CC(CC(C3)C1)C2)c1cc(N2CCNCC2)ncc1Cl	2.09
1062	Cc1c(Sc2ccc(Cl)cc2)c2cc(Cl)ccc2n1Cc1nnn[nH]1	3.25
1063	CC1=C(C(=O)O)N2C(=O)[C@@H](NC(=O)[C@H](N)c3ccc(O)cc3)[C@H]2SC1	-0.86
1064	Cc1ccccc1C(OCCN(C)C)c1ccccc1	1.47
1065	CC(C)c1noc(N2CCN(c3ncc(OCc4ccncc4C#N)cn3)[C@H](C)C2)n1	3.1
1066	Cc1cn([C@H]2CCCN(S(=O)(=O)c3ccc(C(=O)O)c(Oc4cccc(Cl)c4)c3)C2)c(=O)[nH]c1=O	-1.28
1067	O=c1[nH]c(-c2ccc([N+](=O)[O-])cc2)nc2ccccc12	2.5
1068	O=C(NCc1ccccn1)c1ccc(Oc2ccccc2)cc1	2.7
1069	CN1CCN(S(=O)(=O)c2ccc(-c3cnc(N)c(C(=O)Nc4cccnc4)n3)cc2F)CC1	2.66
1070	COc1ccccc1-c1coc2cc(O)ccc2c1=O	2.55
1071	Cn1cc(CN2CCc3cc4nc(N)sc4cc3CC2)cn1	1.06
1072	O=C(CSc1nccn(-c2ccc(F)c(F)c2)c1=O)NC1CCCC1	2
1073	CC(C)C(NC(=O)Cn1c(-c2ccccc2)ccc(NC(=O)OCc2ccccn2)c1=O)C(=O)C(F)(F)F	1.91
1074	Cn1c(SCc2c(Cl)cccc2Cl)nnc1-c1ccc2nonc2c1	3.35
1075	COc1ccc(C(=O)CS(=O)(=O)c2ccccc2)cc1	1.96
1076	CN(C)CC/C=C1\c2ccccc2Sc2ccc(Cl)cc21	3.42
1077	O=C(Nc1ccc(N2CCOCC2)cc1)c1nnc(NC(=O)C2(c3ccc(Cl)cc3)CCC2)o1	3.2
1078	C[C@H](CO)Nc1nc(SCc2ccccc2)nc2[nH]c(=O)[nH]c12	2.75
1079	COCCN(C)Cc1ccc(Nc2ncc3cc(-c4ccncc4)ccc3n2)cc1	2.65
1080	CC(COc1ccccc1)NC(C)C(O)c1ccc(O)cc1	0.56
1081	CC(=O)Nc1ccc(CC(=O)N(C)C2CCN(Cc3ccc(C(F)(F)F)cc3)CC2)cc1	2.9
1082	C[C@@H](C[C@@](C)(CS(=O)(=O)N1CCN(CCc2ccc(Cl)cc2Cl)CC1)N(O)C=O)c1ncc(F)cn1	3.27
1083	Cc1cc(Nc2ncc(F)c(N[C@H]3[C@@H](C(N)=O)[C@@H]4C=C[C@H]3C4)n2)ccc1N1CCN(C)CC1	2.9
1084	Cc1ccc2c(c1)c(Sc1ccccc1)c(CC(=O)O)n2C	1.74
1085	NC(=O)c1cc2ccccc2nc1N	1.07
1086	O=C(c1cc2ccccc2[nH]1)N1CCNCC1	0.6
1087	N#CCc1c[nH]c2ccc(OCc3ccccc3)cc12	3.71
1088	CN(C(=O)Cc1ccc(S(C)(=O)=O)cc1)[C@@H]1CCN(Cc2nc3ccccc3s2)C[C@@H]1F	2.1
1089	CN[C@@H](C)C(=O)N[C@H](C(=O)N1CC[C@H]2CCN(CCc3ccccc3)C[C@H]21)C1CCCCC1	2.47
1090	Cc1cc(Nc2ccnc(NCc3cc(C4CC4)no3)n2)n[nH]1	2.5
1091	COc1ccc2c(c1)N(CCN1CCC(NCc3ccc4c(n3)NC(=O)CO4)CC1)C(=O)CC2	0.66
1092	COc1cccc(C(=O)NCCCOc2cccc3ccc(N)nc23)c1	2.46
1093	Cc1ccc(-c2ccc(F)cc2COc2ccc(CCC(=O)O)cc2)cc1	3.24
1094	COc1cc2ncnc(Nc3cccc(Cl)c3F)c2cc1CN(C)[C@@H](C)C(N)=O	3.42
1095	O=C(/C=C/c1c(C(=O)O)[nH]c2cc(Cl)cc(Cl)c12)Nc1ccccc1	1.52
1096	CC(C)C(NC(=O)Cn1c(-c2ccccc2)ccc(NC(=O)NCc2cccnc2)c1=O)C(=O)C(F)(F)F	2.84
1097	CC[C@H](NC(=O)c1c([S+]([O-])CC)c(-c2ccccc2)nc2ccccc12)c1ccccc1	3.45
1098	Nc1n[nH]c2c(Cl)cccc12	1.7
1099	NC(=O)c1cccc(OC2CCN(CC3CC3)CC2)c1	0.49
1100	Cc1cc(CN2Cc3ccccc3C2C(=O)Nc2ccc(Cl)cc2)ccc1OCC(=O)O	1.38
1101	CC(C)Cn1c(=O)n(C)c(=O)c2c(SC3CCCC3)c(Cc3ccccc3C(F)(F)F)sc21	4.21
1102	O=C(O)[C@H](Cc1cccc(F)c1)N1CCC(CN2CCC(Oc3ccc(Cl)c(Cl)c3)CC2)CC1	2.68
1103	CN(C(=O)Cc1ccc(-n2cnnn2)cc1)[C@H]1CCN(Cc2ccc(C(F)(F)F)cc2)C[C@H]1F	3.3
1104	CC(=O)NC[C@H]1CN(c2ccc(-n3cc(C#N)nn3)c(F)c2)C(=O)O1	0.8
1105	COC(=O)c1ccc2c(c1)N(CCN1CCC(NCc3ccc4c(n3)NC(=O)CO4)CC1)C(=O)CO2	0.83
1106	Clc1ccc2c(c1Nc1ccnc(Nc3ccccc3)n1)OCO2	3.9
1107	COc1cc(OC2CCN(C)CC2)c2c(Nc3c(Cl)ccc4c3OCO4)ncnc2c1	2.98
1108	Cc1cc(CN2Cc3ccccc3C[C@H]2C(=O)Nc2ccc(Cl)cc2Cl)ccc1OCC(=O)O	2.41
1109	O=C1CN(C(=O)c2ccco2)c2ccccc2N1	1.21
1110	O=S(=O)(CCCNCCc1ccc(O)c2nc(O)sc12)NCCOCCc1ccc(F)cc1	1.57
1111	C[C@@H]1CN(C(=O)OC(C)(C)C)CCN1c1ncc(OCC2CCN(S(C)(=O)=O)CC2)cn1	3.5
1112	O=c1ccnc2ccccn12	0.2
1113	Nc1ccccc1NC(=O)c1ccc(-c2ncc(CN3CCCCC3)s2)cc1	2.82
1114	COc1cc(-n2cnc3cc(-c4ccc(Cl)cc4)sc3c2=O)ccc1OC[C@H](OP(=O)(O)O)C1CC1	-0.04
1115	CCCC(=O)Nc1ccc(Cl)c(-c2nc3ncccc3o2)c1	3.37
1116	O=C(Nc1cccc(-c2nnn[nH]2)c1)c1cccc2[nH]cnc12	-0.05
1117	Cc1c(Sc2ccc(Cl)cc2)c2cc(S(C)(=O)=O)ccc2n1CC(=O)O	0.54
1118	Cc1ccc2c(c1)c(S(=O)(=O)c1ccc(Cl)cc1)c(C)n2CC(=O)O	0.06
1119	CCC1(c2cccc(O)c2)CCCCN(C)C1	0.8
1120	COc1cc(OC)c(S(=O)(=O)N2c3ccccc3Oc3ccccc32)cc1NC(=O)CCC(=O)O	-0.53
1121	CC(C)C[C@H](CO)Nc1nc(S[C@@H](C)c2ccccc2)nc2[nH]c(=O)sc12	4.3
1122	CCC(c1cccnc1)n1[nH]c(=O)c2nc3cc(Cl)ccc3c(O)c2c1=O	0.7
1123	COc1cc(Nc2cc(N3CCOCC3)nc(N[C@@H](C)c3ncc(F)cn3)n2)n[nH]1	2.18
1124	NC(=O)c1ccc(O[C@@H]2C[C@@H]3CC[C@H](C2)N3Cc2ccccc2)c(F)c1	2.1
1125	CN(C(=O)Cc1ccc(Cl)cc1)C1CCN(CCC(c2ccccc2)c2ccccc2)CC1	3.5
1126	Nc1ncccc1NCc1cccc(-c2cccnc2)c1	3
1127	O=C(Nc1ccc(Cl)c(Cl)c1)N1CCN(C[C@@H]2CCCN(C3CC3)C2)CC1	3.57
1128	Nc1nnc(CCSCCc2nnc(N)s2)s1	-0.1
1129	CNc1cccc(CCOc2ccc(C[C@H](NC(=O)c3c(Cl)cccc3Cl)C(=O)O)cc2F)n1	-0.05
1130	CC(=O)N1CCN(c2ccc(Nc3nccc(-c4cnc(C)n4C(C)C)n3)cc2)CC1	2.39
1131	Cn1c(=O)c2c(-c3ccc(S(C)(=O)=O)o3)n(Cc3ccnc4ccc(Cl)cc34)nc2n(CC2CC2)c1=O	2.71
1132	COCCC(=O)NC(C)c1ccc(Nc2ncc3cc(-c4ccncc4)ccc3n2)cc1	2.98
1133	CC(C)Cc1ccc([C@@H](C)C(=O)NS(C)(=O)=O)cc1	0.51
1134	COC(=O)CCCCCCC(=O)Nc1ccc2c(c1)-c1ccccc1C(=O)C2=O	2.6
1135	CC(=O)Nc1cnc2ccn(-c3cc(NC4CC4)n4ncc(C#N)c4n3)c2c1	2.69
1136	CC[C@H]1CN(Cc2cc(Cl)ccc2OCC(=O)O)CCN1S(=O)(=O)c1ccccc1	0.44
1137	c1ccc2[nH]c(CCc3nc4ccccc4[nH]3)nc2c1	3.3
1138	CC[C@H](CO)Nc1nc(SCc2ccccc2)nc2[nH]c(=O)sc12	3.22
1139	COc1cc(C(=O)Nc2cc(NC(=O)c3cccc(N(C)C)c3)ccc2C)cc(OC)c1OC	2.54
1140	O=C(Nc1ccccc1)c1ccc(OCCCN2CCCC2)cc1OCc1cccc(F)c1	3.67
1141	NC(=O)c1cn([C@@H]2O[C@H](CO)[C@@H](O)[C@H]2O)c2ncnc(N)c12	-0.87
1142	COc1ccc(Oc2ncccc2C(=O)NCc2ccccc2Cl)cc1	3.59
1143	COc1cc2ncc(C(N)=O)c(Nc3ccccc3F)c2cc1OC	2.81
1144	Cc1ncc(-c2nc(Nc3ccc(N4CCOCC4)cc3)ncc2F)n1C(C)C	3.01
1145	CCOc1ccc(-n2c(CC)nc3ccccc3c2=O)cc1	3.27
1146	CCCc1c(OCCCSc2ccc(CC(=O)O)cc2Cl)ccc(C(=O)CC)c1O	3.57
1147	Cc1nc(-c2ccccc2)c(-c2ccc(CN3CCC(n4c(=O)[nH]c5ccccc54)CC3)cc2)[nH]c1=O	3.9
1148	O=CN(O)C1(CS(=O)(=O)N2CCN(c3ccc(F)cc3)CC2)CCC1	1.34
1149	Nc1ccccc1NC(=O)c1ccc(CNc2nccc(-c3cccnc3)n2)cc1	2.28
1150	CCCSc1nc(N[C@@H]2C[C@H]2c2ccccc2)c2nnn([C@@H]3C[C@H](C(N)=O)[C@@H](O)[C@H]3O)c2n1	2.05
1151	C1=CCC(c2ccc3ccccc3c2)CNC1	1.64
1152	c1ccc(CCNCc2ccccc2)cc1	1.65
1153	CCC1(c2ccccc2)C(=O)NC(=O)NC1=O	0.05
1154	O=C(NCc1ccncn1)c1ccc(Oc2ccc(C#C[C@@]3(O)CN4CCC3CC4)cc2)cc1	1.77
1155	Cc1ccc(NC(=O)c2ccccc2F)cc1-n1cnc2ccc(N3CCN(C)CC3)cc2c1=O	2.75
1156	O=c1c(-c2ccc(O)cc2)coc2cc(O)cc(O)c12	3.06
1157	CCn1cc(NC(=O)Cc2ccc(Oc3ccnc4cc(OC)c(OC)cc34)cc2OC)cn1	3.42
1158	COCCNS(=O)(=O)c1ccc(Nc2nccc(-c3cnc4cccnn34)n2)cc1	2.8
1159	Cc1c(Sc2ccc(Cl)cc2)c2c(-c3ccccc3)cccc2n1CC(=O)O	2.61
1160	CC(C)C(NC(=O)Cn1c(-c2ccc(F)cc2)ncc(NC(=O)OCc2ccccc2)c1=O)C(=O)C(F)(F)F	2.47
1161	Cc1nocc1C(=O)Nc1ccc(-c2ccccc2OC(F)(F)F)c(N)n1	3.7
1162	CC1(COc2cc(-c3cccc4c(=O)cc(N5CCOCC5)oc34)ccc2NC(=O)CN2CCOCC2)COC1	2.2
1163	Oc1ccc(-c2nc3ccccc3nc2-c2ccc(O)cc2)cc1	2.7
1164	O=C(NCC12CC3CC(CC(C3)C1)C2)c1cc(OC2CCNCC2)ncc1Cl	1.56
1165	O=C(Cc1ccccc1)c1ccc(O)cc1O	3.09
1166	c1csc(Cn2nnnc2CN2CCN(c3nc4ccccc4s3)CC2)c1	3.65
1167	N[C@@H]1CCCN(c2c(/C=C3\SC(=O)NC3=O)cccc2-c2ccncc2)C1	1.56
1168	CCCN(CCC)C(=O)c1cccc(C(=O)N[C@@H](Cc2ccccc2)[C@H](O)CNC2Cc3ccccc3C2)c1	3.3
1169	Cc1cc2n[nH]c(=O)n2c2cc(-c3ccc(C(=O)N4CCOCC4)cc3)ccc12	2.77
1170	Nc1[nH]nc2ccccc12	1
1171	CS(=O)(=O)NC(=O)CCCc1c(-c2ccc(F)cc2)[nH]c2ccc(C#N)cc12	1.5
1172	CC(=O)NC[C@H]1CN(c2ccc(-n3cnc(C#N)c3)c(F)c2)C(=O)O1	1.51
1173	COc1ncccc1-c1cccc2c(N)c3c(nc12)CN(C1CCC1)C3=O	3.26
1174	COCCC(C)n1nc(C)c(C(=O)N[C@@H](C)C(C)(C)C)c1NS(=O)(=O)c1ccc(C)cc1	0.78
1175	Nc1ccccc1NC(=O)c1ccc(C2CCN(Cc3ccccc3)CC2)cc1	2.51
1176	CCCc1cc(=O)[nH]c(=S)[nH]1	0.7
1177	O=c1c2ccccc2nc2n1CCO2	0.6
1178	NC(=O)c1cc([N+](=O)[O-])cc([N+](=O)[O-])c1	0.81
1179	CCC1(C)CC(=O)NC1=O	0.23
1180	NC(=O)c1ccn2c(-c3ccccc3)c(-c3ccc(C4(N)CCC4)cc3)nc2c1	2
1181	Cc1cc2n[nH]c(=O)n2c2cc(-c3ccc[nH]3)ccc12	3.29
1182	CC(C)N1CCN(Cc2cnc(-c3ccc(C(=O)Nc4ccccc4N)cc3)c(F)c2)CC1	1.6
1183	CN(C(=O)Cc1ccc(-n2cnnn2)cc1)[C@@H]1CCN(Cc2ccc(C(F)(F)F)cn2)C[C@@H]1F	2.1
1184	CCCCCC/N=c1\ccn(Cc2ccccc2)c2cc(Cl)ccc12	0.98
1185	O=C(O)CC(=O)N[C@@H]1c2ccccc2C[C@H]1NC(=O)c1cc2sc(Cl)c(Cl)c2[nH]1	1.18
1186	Nc1nc2ccccc2s1	2
1187	Cc1ncc(-c2ccnc(Nc3ccc(C(=O)NCCO)cc3)n2)n1C(C)C	2.09
1188	CCOCc1nc2c(N)nc3ccccc3c2n1CC(C)(C)O	1.69
1189	FC(F)(F)c1nnc2ccc(-n3ccnc3)nn12	0.91
1190	CCOC(=O)c1ccc(CCN2CCN(c3ccc(C)nn3)CC2)cc1	2.58
1191	Cc1cc(-c2ccc(-c3nc4ccncc4c(O)c3C#N)cc2)ccn1	1.6
1192	Cn1cnc(-c2ccccc2)c1/C=C/c1ccnc(N)n1	2.61
1193	Cc1cc(C)c(C(=O)N[C@@H](Cc2ccc(OCCCNc3ccccn3)cc2)C(=O)O)c(C)c1	0.49
1194	COc1cc2ncc(C(N)=O)c(Nc3ccc(F)c(Cl)c3)c2cc1OC	3.22
1195	O=C(O)c1cc(-c2ccccc2)nc2ccccc12	-0.7
1196	N[C@H]1CCN(c2c(Cl)cccc2/C=C2\SC(=O)NC2=O)C1	1.89
1197	O=C(NCC1(O)CCCCCC1)c1cc(-c2ccccc2C(=O)O)ccc1Cl	-0.34
1198	CC(C)N1CCN(C(=O)NCc2ccc(Cl)c(Cl)c2)CC1	2.75
1199	Cc1cn([C@H]2CCCN([C@@H](C)c3ccc(C(=O)O)c(Oc4cccc(Cl)c4)c3)C2)c(=O)[nH]c1=O	-0.26
1200	COc1ccc(N(C(=O)c2occc2CO)C(C(=O)NC[C@@H](C)O)c2ccccc2F)c(OC)c1	1.37
1201	NC1(c2ccc(-c3ncc4cccn4c3-c3ccccc3)cc2)CCC1	2.5
1202	CC(C)Nc1nc(NCc2ccccc2)c2sccc2n1	3.9
1203	CNS(=O)(=O)c1ccc(Oc2ccc(C#C[C@]3(O)CN4CCC3CC4)cc2)cc1	2.03
1204	CCOC(=O)c1ccc(COCC2CCN(c3ccc(C)nn3)CC2)cc1	2.68
1205	Clc1ccc(COC(Cn2ccnc2)c2ccc(Cl)cc2Cl)cc1	2.54
1206	Cc1cc(Oc2ccnc(Nc3ccc(N4CCOCC4)cc3)c2)c(-c2ccccn2)nc1C	2.59
1207	C[C@H]1O[C@@H](n2cnc3c(N)nc(OC4CCCC4)nc32)[C@H](O)[C@H]1Cl	3.18
1208	Nc1ncnc2[nH]ccc12	1.78
1209	O=S(=O)(Nc1nncs1)c1cc(Cl)c(Oc2ccc(C(F)(F)F)cc2-c2ccnnc2)cc1F	1.15
1210	NC(=O)c1cccc(O[C@H]2C[C@@H]3CC[C@H](C2)N3CCc2ccccc2)c1	2
1211	Clc1ccc2[nH]ncc2c1	2.44
1212	NC(=O)c1cccc(S[C@@H]2C[C@@H]3CC[C@H](C2)N3Cc2ccccc2)c1	2.22
1213	NC(=O)C[S+]([O-])C(c1ccccc1)c1ccccc1	1.12
1214	CC(=O)Nc1ccc(CNc2[nH]nc3ccnc(Oc4ccccc4)c23)cc1	3.03
1215	N=C(N)N1CCc2ccccc2C1	-1.01
1216	NC(=O)c1c(OCc2c(F)cc(Br)cc2F)nsc1NC(=O)NCCCCN1CCCC1	2.5
1217	O=S(=O)(C1CCNCC1)C1(c2cc(N3CCOCC3)nc(-c3cccc4[nH]ccc34)n2)CC1	1.1
1218	Cc1ccc2c(-c3ccnc4cc(Cl)ccc34)c(C)n(CC(=O)O)c2c1	2.41
1219	Cc1ccc(Nc2nccc(N(C)c3ccc4c(C)n(C)nc4c3)n2)cc1S(N)(=O)=O	3.3
1220	Cc1ccc2nc(NCCN)c3ncc(C)n3c2c1	0.88
1221	CNC(=O)c1ccc(C)c(-n2c(C)cc(OCc3ccc(F)cc3F)c(Br)c2=O)c1	2.8
1222	O=C(Nc1ccccc1)c1cc(Cl)ccc1O	2.9
1223	CC(C)Cn1c(=O)n(C)c(=O)c2c(C(=O)N3C[C@H](O)[C@H](O)C3)c(Cc3ccnc4ccccc34)sc21	1.18
1224	O=c1c2ccccc2[se]n1-c1ccccc1	3.31
1225	COc1ccc2ccc(=O)n(CCN3CCC(NCc4cc5c(cn4)OCCO5)CC3)c2c1	1.31
1226	CC(C)COc1cc(OC(C)C)cc(C(=O)Nc2ccc(C(=O)O)cn2)c1	1.6
1227	O=C1CN(C(=O)c2ccccc2)C(c2ccccc2)c2cc(Cl)ccc2N1	3.31
1228	CNC(=O)c1ccc(Nc2nccc(-c3cnc(C4CC4)n3C(C)C)n2)cc1	2.77
1229	CC(C)CC(c1ccccn1)n1[nH]c(=O)c2nc3cc(Cl)ccc3c(O)c2c1=O	1.83
1230	N#Cc1cnn(-c2ccccc2)c1NC(=O)CN1CCOCC1	0.5
1231	CCN(CC)CC(=O)Nc1c(C#N)cnn1-c1ccccc1	0.4
1232	CCC(=O)O[C@H]1CC[C@H]2[C@@H]3CCC4=CC(=O)CC[C@]4(C)[C@H]3CC[C@]12C	3.3
1233	CCCC(C)(COC(N)=O)COC(=O)NC(C)C	2.01
1234	CC(=O)Nc1ccc(O)cc1OC[C@@H](O)CN1CCC2(CC1)Cc1cc(Cl)ccc1O2	2.76
1235	O=[N+]([O-])c1ccc2[nH]ncc2c1	2.2
1236	Cc1cc(C)cc(-c2[nH]c3ccccc3c2CCNCCCCc2ccncc2)c1	3.3
1237	CCOC(=O)Nc1ccc2c(c1)N(C(=O)CCN1CCOCC1)c1ccccc1S2	3.1
1238	N#Cc1ccccc1C[C@@H](C(=O)O)N1CCC(CN2CCC(Oc3ccc(Cl)c(Cl)c3)CC2)CC1	2.12
1239	Cc1ccc(C)c(OCCCC(C)(C)C(=O)O)c1	0.72
1240	O=S(=O)(NCC(c1ccccc1)N1CCCCCC1)c1cccnc1	2.1
1241	CCN(C(=O)Cc1ccc(S(N)(=O)=O)cc1)C1CCN(CCC(c2ccccc2)c2ccccc2)CC1	2.4
1242	O=S(=O)(Nc1cccnc1)c1ccccc1	0.84
1243	COC(=O)[C@@H]1C2CCC(C[C@@H]1c1ccc(I)cc1)N2CCCF	2.3
1244	COCCOc1cc2nccc(Nc3cc(O)c(Cl)cc3F)c2cc1OC	2.64
1245	CC(C)N1CCN(Cc2cnc(-c3ccc(C(=O)Nc4ccccc4N)cc3)c(C#N)c2)CC1	1.28
1246	O=C(Nc1nnc(C(=O)Nc2ccc(N3CCOCC3)cc2)o1)c1ccccc1	1.02
1247	Cc1ccc(-n2nc(C(C)(C)C)cc2NC(=O)Nc2ccc(OCCN3CCOCC3)c3ccccc23)cc1	4.49
1248	COc1cc2c(Nc3ccc(F)c(Cl)c3)c(C(N)=O)cnc2cc1OCCCN1CCN(C)CC1	1.2
1249	Cn1cnc2cc(C#Cc3ccccc3)cnc21	3.5
1250	C[C@H](Nc1ncc(F)c(Nc2cc(N(C)C)[nH]n2)n1)c1ncc(F)cn1	1.98
1251	O=C1C2=Nc3ccccc3CN2c2ccccc21	2.71
1252	CCNc1ccc(-c2ccccc2)n(CC(=O)NC(C(=O)C(F)(F)F)C(C)C)c1=O	2.37
1253	C[C@H](CO)Nc1nc(SCc2cccc(F)c2F)nc2[nH]c(=O)c(=O)[nH]c12	2.48
1254	COc1ccc(Cl)cc1NC(=O)Nc1cnccn1	3.63
1255	Cc1ccc(NC(=O)c2ccc(Cl)c(C(F)(F)F)c2)cc1C(=O)Nc1cccnc1	2.83
1256	CNc1cccc(CCOc2ccc(C[C@H](NC(=O)c3c(F)cccc3Cl)C(=O)O)cc2)n1	-0.42
1257	CCOc1cc2ncc(C(N)=O)c(Nc3ccc(F)cc3F)c2cc1N1CCC(O)CC1	2.74
1258	CN1CCN(c2cc3c(Nc4ccc(F)cc4F)c(C(N)=O)cnc3cc2F)CC1	2.63
1259	NC1(c2ccc(-c3nn4ccccc4c3-c3ccccc3)cc2)CCC1	3.2
1260	CN(C)C(=O)N[C@H]1CC[C@@H](CCN2[C@H]3CC[C@@H]2C[C@H](Oc2cccc(C(N)=O)c2)C3)CC1	0.22
1261	COCCNC(=O)c1ccc(Nc2ncc3cc(-c4cccnc4)ccc3n2)cc1	3.11
1262	CCOC(=O)c1ccc(OCCC2CN(c3ccc(C)nn3)C2)cc1	3.22
1263	O=C(N[C@@H](Cc1ccccc1)C(=O)N1CCC(O)CC1)c1cc2cc(Cl)ccc2[nH]1	3.6
1264	C=CCOc1cc(-c2cccc3c(=O)cc(N4CCOCC4)oc23)ccc1NC(=O)CN1CCOCC1	3
1265	Cc1cccc(C#Cc2ccccc2)n1	3.6
1266	COc1cccc2sc(NC(=O)c3ccccc3)nc12	3.96
1267	Nc1nc(-c2ccccc2)nn1Cc1ccccc1	1.91
1268	COc1ccc2c(c1)N(CCN1CCC(NCc3cc4c(cn3)OCCO4)CC1)C(=O)CO2	1.24
1269	COc1ccnc(N(C)c2ccnc(Nc3cc(N4CCOCC4)cc(N4CCOCC4)c3)n2)c1	2.23
1270	Oc1nc(-c2ccccc2)c(-c2ccccc2)o1	3.42
1271	COc1ccc(/C=C2/CCc3ccccc3C2=O)cc1CN1CCOCC1	3.8
1272	CC(C)(C)c1ccc(C(O)CCCN2CCC(C(O)(c3ccccc3)c3ccccc3)CC2)cc1	3.99
1273	NC(=O)c1cnc(N[C@H]2CCCNC2)c2cc(-c3ccc(F)c(F)c3)sc12	2.17
1274	O=c1[nH]c2c(O)ccc([C@@H](O)CNCCCOCCOCCc3ccccc3)c2s1	1.09
1275	O=C(N[C@@H](c1ccccc1)[C@@H]1CCCCN1)c1cccc(C(F)(F)F)c1Cl	2.61
1276	N#CC1(NC(=O)[C@@H]2CCCC[C@H]2C(=O)N2CCN(c3nc(C(F)(F)F)cs3)CC2)CC1	2.4
1277	CC(C)Nc1nc(C#N)nc(N2CCOCC2)c1N	2.04
1278	Cc1cc(N)nc(CCNC(=O)c2ccc(C#N)cc2)c1	1.62
1279	CCNC1=Nc2ccccc2C(c2ccccc2)=NC1c1cccs1	3.98
1280	Cc1ccc(-c2nnc(O)c3ccccc23)c(C)c1	3.41
1281	Cc1nc(-c2ccccn2)nc(N2CCCC2)c1Cl	3.2
1282	C[C@@H](NC(=O)C1(N)CCN(c2ncnc3[nH]ccc23)CC1)c1ccc(Cl)cc1	3.3
1283	C[C@H]1CN(Cc2cc(Cl)ccc2OCC(=O)O)C[C@@H](C)N1C(=O)Cc1ccccc1	0.7
1284	Cc1ccc(C(=O)N(CCCN)Cc2nc3cc(Cl)ccc3c(=O)n2Cc2ccccc2)cc1	1.47
1285	N#CCNC(=O)[C@@H]1CCCC[C@H]1C(=O)N1CCc2ccccc2C1	1.91
1286	C#Cc1cccc(Nc2ncnc3cc(OCCOC)c(OCCOC)cc23)c1	3.35
1287	CN(C)C/C=C/C(=O)Nc1cc2c(Nc3ccc(F)c(Cl)c3)ncnc2cc1O[C@H]1CCOC1	3.7
1288	CN[C@@H](C)C(=O)N[C@H](C(=O)N[C@H]1CCCN(CCc2ccc(O)cc2)C1)C(C)(C)C	0.77
1289	CCOC(=O)c1ccc(OCC2CCN(c3ccc(C)nn3)C2)cc1	3.44
1290	O=C(N[C@@H](Cc1ccc(OCCc2ccc3c(n2)NCCO3)cc1)C(=O)O)c1c(Cl)cccc1Cl	-0.18
1291	O=C1C(CC[S+]([O-])c2ccccc2)C(=O)N(c2ccccc2)N1c1ccccc1	-0.51
1292	Cc1c(F)ccc2c1c(Sc1ccc(Cl)cc1)c(C)n2CC(=O)O	2.23
1293	Cc1ccc(CO)cc1N(C)c1ccnc(Nc2cc(N3CCOCC3)cc(N3CCOCC3)c2)n1	2.94
1294	Nc1n[nH]c(N)c1Cc1ccc2c(c1)OCO2	0.47
1295	CCCCSc1nc(N)c2ncn(Cc3c(F)ccc(C)c3F)c2n1	3
1296	COc1ccc(-c2ccc3c(N4CCOCC4)nc(N4C[C@H](C)O[C@H](C)C4)nc3n2)cc1CNCCO	1.31
1297	COc1cccc(C(COCc2cc(C(F)(F)F)cc(C(F)(F)F)c2)N2CCNCC2)c1	3.1
1298	Nc1ccc2c(c1)-c1ccccc1C(=O)C2=O	2.39
1299	Cc1cc(CNc2ncc(Br)c(Nc3cc(C)[nH]n3)n2)on1	2.92
1300	COc1ccc(CCN2CN=C(SCc3ccc(Cl)cc3)NC2)cc1OC	2.41
1301	O=C(Nc1ccc(Cl)c(Cl)c1)N1CCN(C[C@@H]2CCCN(Cc3ccccc3)C2)CC1	4.26
1302	CC(=O)Nc1nc(-c2ccccc2)ns1	2.8
1303	O=C(N[C@H](CO)[C@H](O)c1ccc([N+](=O)[O-])cc1)C(Cl)Cl	1.15
1304	N#Cc1ccc2[nH]c(-c3ccc(F)cc3)c(CCCC(=O)NS(N)(=O)=O)c2c1	1.95
1305	O=c1[nH]c2c(O)ccc([C@@H](O)CNCCSCCCNCCc3cccc(Cl)c3Cl)c2s1	2.2
1306	C[C@@](Cc1ccc(O)c(O)c1)(NN)C(=O)O	-0.7
1307	CC(=O)Nc1cccc2c1c(Oc1ccc(Cl)cc1)c(C)n2CC(=O)O	-1.41
1308	COC[C@H](C)Oc1cc(Oc2ccc(S(C)(=O)=O)cc2)cc(C(=O)Nc2ccc(C(=O)O)cn2)c1	-0.41
1309	Cc1nc2n(c(=O)c1CCN1CCC(c3noc4cc(F)ccc34)CC1)CCCC2	2.05
1310	Cc1nc(CS(=O)(=O)c2ccc(Cl)cc2)cc(N2CCOCC2)n1	1.8
1311	O=C(O)[C@H](Cc1ccc(F)cc1)N1CCC(CN2CCC(Oc3ccc(Cl)cc3)CC2)CC1	1.9
1312	COc1ccc2nc(C)cc(OCC(=O)Nc3ccccc3OC)c2c1	3.9
1313	CCN(CC)C(=O)c1ccc(C(=C2CCN(Cc3ccc(F)cc3)CC2)c2ccccn2)cc1	3.28
1314	CCCCCCCN(CC)CCCC(O)c1ccc(NS(C)(=O)=O)cc1	1.2
1315	CC(NC(=O)C1(N)CCN(c2ncnc3[nH]ccc23)CC1)c1ccc(Cl)cc1	2.7
1316	C[C@]12CC[C@H]3[C@@H](C=CC4=CC(=O)CC[C@@]43C)[C@@H]1CC[C@@]21CCC(=O)O1	3.2
1317	Cc1ccc2c(c1)c(Sc1cccc(Cl)c1)c(C)n2CC(=O)O	1.85
1318	COc1ccc2c(C)nc(NC(=N)N)nc2c1	-0.51
1319	Fc1ccc(CNc2ncc(Br)c(Nc3cc(C4CC4)[nH]n3)n2)cc1	4.28
1320	O=C(O)COc1ccc(C(F)(F)F)cc1-c1ccc(Cl)cc1	0.9
1321	CC(O)(C(=O)c1ccccc1)c1ccccc1	2.92
1322	O=C(c1ccc(-c2noc(=O)[nH]2)cc1)N1CCC(N2CCC(Oc3ccc(Cl)c(Cl)c3)CC2)CC1	2.24
1323	COc1cc(CO)cc(N(C)c2ccnc(Nc3cc(N4CCOCC4)cc(N4CCOCC4)c3)n2)c1	3
1324	Cc1ccc(S(=O)(=O)Nc2c(C(=O)NC(C)C)c(C)nn2-c2ccccc2)cc1	0.46
1325	CN1CCC[C@H]1CCN1CCCc2cc(NC(=N)c3cccs3)ccc21	0.37
1326	COc1cc2c(c(OC)c1OC)-c1ccc(OC)c(=O)cc1C(NC(C)=O)CC2	1.12
1327	Cc1ccc(CN2[C@H]3CC[C@@H]2C[C@H](Oc2cccc(C(N)=O)c2)C3)s1	2.39
1328	OB1c2ccccc2N=C(S)N1c1cccnc1	-0.62
1329	COc1ccccc1CCNCc1cccc(CCNC[C@H](O)c2ccc(O)c3[nH]c(=O)sc23)c1	0.82
1330	Cn1c(C(=O)O)c(CCCOc2cccc3ccccc23)c2ccccc21	2.99
1331	O=S(=O)(c1ccccc1)C1(c2cc(N3CCOCC3)nc(-c3cccc4[nH]ccc34)n2)CC1	3.4
1332	CS(=O)(=O)c1ccc(C(=O)Nc2ccc(Cl)c(-c3ccccn3)c2)c(Cl)c1	2.84
1333	Cc1nc(N)c2nc(O)n(Cc3ccccc3)c2n1	2.04
1334	CCCNC(=O)NS(=O)(=O)c1ccc(Cl)cc1	-0.33
1335	COC[C@@H](c1ccc(C(F)(F)F)cc1)N1CCN(C2(C)CCN(C(=O)c3c(C)ncnc3C)CC2)C[C@@H]1C	2.7
1336	COc1ccc(S(=O)(=O)Nc2ccc(/C=C/C(=O)Nc3ccccc3N)cc2)cc1OC	2.56
1337	O=C(O)C(c1ccccc1)N1CCC(N2CCC(Oc3ccc(Cl)c(Cl)c3)CC2)CC1	2.23
1338	CC(=O)[C@@]1(O)CC[C@H]2[C@@H]3C[C@H](C)C4=CC(=O)C=C[C@]4(C)[C@@]3(F)[C@@H](O)C[C@@]21C	2.65
1339	O=C(NCc1ccccc1Cl)c1ccccc1Oc1ccccc1	3.58
1340	CC1(COc2ccc3c(c2)ncn3-c2ccc3cccc(N4CCC(N)CC4)c3n2)COC1	1.99
1341	O=C(CCCN1CCC(O)(c2ccc(Cl)cc2)CC1)c1ccc(F)cc1	2.67
1342	Cc1ccc(S(=O)(=O)Nc2c(C(=O)N[C@@H](C)C(C)(C)C)c(C)nn2-c2ccccc2)cc1	1.44
1343	CC(C)C(NC(=O)Cn1c(-c2ccccc2)ccc(NC(=O)Cc2cccc(C(=O)O)c2)c1=O)C(=O)C(F)(F)F	0.68
1344	O=C(O)CCC(=O)c1ccc(-c2ccccc2)cc1	0.58
1345	CCCSc1c(C(=O)NC2CCCCC2)cnn1[C@H]1CC[C@@H](C(=O)O)CC1	1.39
1346	COc1cc(Nc2c(C#N)cnc3cc(OCCCN4CCN(C)CC4)c(OC)cc23)c(Cl)cc1Cl	3.5
1347	Nc1c(C(=O)NC2CC2)nnc2c(-c3ncccn3)cccc12	1.5
1348	CC[C@@]1(O)C(=O)OCc2c1cc1n(c2=O)Cc2cc3c(CN(C)C)c(O)ccc3nc2-1	0.31
1349	CN[C@@H](C)C(=O)N[C@H](C(=O)N[C@H]1CCCN(CCCc2ccccc2)C1)C1CCCCC1	2.6
1350	COc1cc2c(Nc3c(Cl)ccc4c3OCO4)ncnc2cc1OCC1CCN(C)CC1	1.83
1351	O=C(NCc1ccccc1Cl)c1cccnc1Oc1ccccc1	3.68
1352	NS(=O)(=O)c1cc(C2(O)NC(=O)c3ccccc32)ccc1Cl	0.97
1353	Cc1cc(OCCCS(C)(=O)=O)cc(C)c1-c1cccc(COc2ccc3c(c2)OC[C@H]3CC(=O)O)c1	2.3
1354	COc1ccc2nc(NC(=O)CCc3ccc(OC)c(OC)c3)sc2c1	3.57
1355	Cc1ccc2[nH]c(C(=O)N3CCN(C)CC3)cc2c1	2.22
1356	CNc1cccc(CCCc2ccc(C[C@H](NC(=O)c3c(Cl)cccc3Cl)C(=O)O)s2)n1	0.78
1357	COc1cc(OC)c(S(=O)(=O)N2c3ccccc3CCC2C)cc1NC(=O)CCc1nn[nH]n1	-0.34
1358	CCOC(=O)c1ccc(OCCC2CCN(c3ccc(C)nn3)CC2)cn1	2.63
1359	CC(C)(C)OC(=O)N1CCN(c2ccc(OCc3ccc(S(C)(=O)=O)cc3)cn2)CC1	3.2
1360	Fc1cccc(-c2cncc(CNCC3CC3)n2)c1F	1.82
1361	O=C1Nc2ccc(Cl)cc2C(c2ccccc2Cl)=NC1O	2.38
1362	CCCNC(=O)c1nnc2c(-c3cncc(C(=O)N4CCC4)c3)cccc2c1N	2.79
1363	CS(=O)(=O)c1cccc2c3c([nH]c12)CCN(C(=O)[C@@H]1CCCC[C@H]1C(=O)NC1(C#N)CC1)C3	1.7
1364	CN(C)CCCNS(=O)(=O)c1ccc(Nc2nccc(-c3cnc4cccnn34)n2)cc1	1.4
1365	O=C(C1CCN(c2nnc(-n3cccc3)s2)CC1)N1CCc2ccccc2C1	3.7
1366	O=C1CN(C(=O)c2ccco2)C(c2ccccc2)c2cc(Cl)ccc2N1	3
1367	CC(C)CNc1nc(C#N)nc(NC2CCS(=O)(=O)C2)c1N	2.3
1368	COc1cc(N2CCN(C(C)=O)CC2)ccc1Nc1ncc(Cl)c(-c2cnc3cc(F)ccn23)n1	3.7
1369	O=C(NCc1ccncn1)c1ccc(Oc2ccc(C#C[C@]3(O)CN4CCC3CC4)cc2)cc1	1.78
1370	CN(C)CCNC(=O)c1ccc(Nc2ncc3cc(-c4ccncc4)ccc3n2)cc1	2.29
1371	Cc1cc(S(=O)(=O)Nc2nc(Nc3ccc(Cl)cc3)n[nH]2)c(S)cc1Cl	2.09
1372	CCCCC[C@H](c1ccc(C(=O)O)c(Oc2cccc(Br)c2)c1)N1CCC[C@H](n2cc(C)c(=O)[nH]c2=O)C1	1.69
1373	CN1CC(=O)N2[C@H](Cc3c([nH]c4ccccc34)[C@H]2c2ccc3c(c2)OCO3)C1=O	2.6
1374	CCC(CC)NC(=O)c1cnn(-c2ccccn2)c1NS(=O)(=O)c1ccc(C)cc1	0.27
1375	Cc1occc(=O)c1OCc1ccccc1	1.87
1376	O=C1C(=O)c2cccnc2-c2ccccc21	1.88
1377	COc1ccccc1OCC(O)CO	0.24
1378	CNc1c(Br)cnc2[nH]c(-c3cnn(C4CCN(C)CC4)c3)nc12	2.5
1379	CN(CC[C@@H](Oc1ccc(-c2ccccc2)cc1)c1ccc(F)cc1)CC(=O)O	2.86
1380	CCc1cccc2c3c([nH]c12)C(CC)(CC(=O)O)OCC3	0.49
1381	CS(=O)(=O)c1ccc([C@H](CC2CCCC2)C(=O)Nc2nccs2)cc1	3.88
1382	CN1Cc2c(N)cccc2C(c2ccccc2)C1	2.08
1383	Nc1cccc(NC(=O)c2ccc(CNC(=O)OCc3cccnc3)cc2)c1	1.6
1384	CC(NC(C)(C)C)C(=O)c1cccc(Cl)c1	2.12
1385	NC1(Cc2ccc(Cl)cc2)CCN(c2ncnc3[nH]ccc23)CC1	2.72
1386	CC(C)CCCC(C)/N=c1\ccn(Cc2ccccc2)c2cc(Cl)ccc12	1.58
1387	Cc1cc2c(C)cc(=O)oc2c2c1NCCC2	2.9
1388	CC#Cc1cncc(-c2cccc(C3(C4CC4)N=C(C)C(N)=N3)c2)c1	3.3
1389	Cn1cncc1-c1c2c(=O)n(C)c(=O)n(CC3CC3)c2nn1Cc1ccnc2ccc(Cl)cc12	2.69
1390	NC(=O)c1cnc(N[C@H]2CCCNC2)c2cc(-c3ccc(F)cc3)sc12	2.01
1391	Cc1c(Sc2ccc(Cl)cc2)c2cccc(Cl)c2n1CC(=O)O	2
1392	OC(CCN1CCCCC1)(c1ccccc1)C1CCCCC1	2.68
1393	O=C(COCc1ccncc1)N1CCN(c2ccc(F)cc2Cl)CC1	2.63
1394	COc1cc(F)ccc1-c1cncc(CNC[C@@H]2CCCO2)n1	2
1395	Nc1ncnc2nc(-c3ccc(N4CCOCC4)nc3)cc(-c3cccc(Br)c3)c12	3.2
1396	Cc1cn(Cc2ccccc2)c(=O)[nH]c1=O	1.19
1397	CCCCCc1cc(=O)[nH]c(N)n1	1.62
1398	Cc1nn(-c2ccccc2)c(NS(=O)(=O)c2cccc(CN3CCOCC3)c2)c1C(=O)N[C@@H](C)C(C)(C)C	0.29
1399	O=c1[nH]n(Cc2ccoc2)c(=O)c2c(=O)c3ccc(Cl)cc3[nH]c12	0.6
1400	O=C1CCOc2nc(COc3ccccc3)ccc21	2.3
1401	Nc1nc2ccccc2n1C(=O)c1ccccc1	1.56
1402	CC(C)c1nnc2ccc(-c3ocnc3-c3cc(F)ccc3F)cn12	2.44
1403	CC(=O)N1CCN(c2ccc(OCC3COC(Cn4ccnc4)(c4ccc(Cl)cc4Cl)O3)cc2)CC1	3.7
1404	Cc1cn([C@H]2CCCN(Cc3cccc(Oc4cccc(Br)c4)c3)C2)c(=O)[nH]c1=O	3.68
1405	C=CC(=O)Nc1cccc(Oc2nc(Nc3ccc(N4CCN(C)CC4)cc3OC)ncc2Cl)c1	3.9
1406	CCn1cc(NC(=O)Cc2ccc(Oc3ccnc4cc(F)ccc34)cc2OC)cn1	3.93
1407	COc1cc(F)ccc1-c1cncc(CNC(=O)C2CC2)c1	2.9
1408	O=C(Cc1ccc(F)c(C(F)(F)F)c1)Nc1cccc2c(=O)n([C@@H]3CNC[C@H]3O)ccc12	1.33
1409	Cn1c(-c2ccccc2)cc2onc(-c3ccncc3)c2c1=O	3.17
1410	Cc1cc(N)n(-c2ccccc2)n1	1.25
1411	C=CCn1c(=O)c2c(-c3nc(C#N)cn3C)n(Cc3ccnc4ccc(Cl)cc34)nc2n(CC2CC2)c1=O	3.92
1412	O=C(O)C[C@@H]1c2ccccc2C[C@H]1NC(=O)c1cc2cc(F)ccc2[nH]1	1.26
1413	NS(=O)(=O)c1cc2c(cc1Cl)NCNS2(=O)=O	-0.09
1414	Clc1ccc(C2=CSC3=NCCN23)cc1Cl	1.54
1415	O=c1ccnc2cc(C#Cc3ccccc3)ccn12	2.9
1416	COc1ncc2ncc(=O)n(CCN3CCC(NCc4cc5c(cn4)OCCO5)CC3)c2n1	-0.14
1417	CC(C)N(C(=O)C(c1cccnc1)C(CNC(=O)NCc1ccccc1F)c1ccccc1)C(C)C	4.2
1418	Cc1sc(CN2CCNCC2)cc1C(=O)NCC12CC3CC(CC(C3)C1)C2	2.55
1419	Cc1cc(CCCOc2c(C)cc(-c3noc(C(F)(F)F)n3)cc2C)on1	3.63
1420	CC(C)C(NC(=O)Cn1c(-c2ccccc2)ncc(NC(=O)OCc2ccccc2)c1=O)C(=O)C(F)(F)F	2.12
1421	NC(=O)c1cncc(O[C@@H]2C[C@@H]3CC[C@H](C2)N3Cc2ccccc2)n1	1.1
1422	COc1cc2c(Nc3cccc(Cl)c3Cl)c(C(N)=O)cnc2cc1NCCN(C)C	3.41
1423	Cc1cnc(NC(=O)C2C(=O)c3ccccc3S(=O)(=O)N2C)s1	0.3
1424	Cc1cn([C@H]2CCCN(Cc3ccc(C(=O)O)c(Oc4cccc(Cl)c4)c3)C2)c(=O)[nH]c1=O	-0.55
1425	CCn1cc(C(=O)O)c(=O)c2cc(F)c(N3CCNCC3)nc21	-0.83
1426	Cc1cc2[nH]c(=O)c(O)cc(=O)c2cc1C	1.99
1427	CC(C)(c1cc(N2CCOCC2)nc(-c2cccc3[nH]ccc23)n1)S(C)(=O)=O	2.65
1428	CC(C)(C)OC(=O)c1ncn2c1[C@@H]1CCCN1C(=O)c1c(Br)cccc1-2	2.48
1429	COc1cc2ncnc(Nc3cccc(O)c3)c2cc1OC	2.6
1430	O=C(Nc1ccc(N2CCOCC2)cc1)c1nnc(Nc2ccccc2F)o1	3.05
1431	Nc1ccc2c(c1)C(=O)C(=O)c1cc(N)ccc1-2	1.72
1432	COC(=O)N1CCOc2cc(COc3ccccc3)cnc21	2.5
1433	N[C@@H]1CCCN(c2c(Cl)cccc2/C=C2\SC(=O)NC2=O)C1	1.97
1434	CC[C@H](NC(=O)c1c([S+](C)[O-])c(-c2cccs2)nc2ccccc12)c1ccccc1	3.56
1435	CCN(C)C(=O)c1ccc(C(=C2CCN(Cc3ccc(F)cc3)CC2)c2ccccc2NC(C)=O)cc1	2.79
1436	Nc1nccc(-c2cc3c([nH]2)[C@H](CCF)CNC3=O)n1	0.51
1437	CCCc1nc2c(C)cc(-c3nc4ccccc4n3C)cc2n1Cc1ccc(-c2ccccc2C(=O)O)cc1	2.21
1438	C=C[C@H]1CN2CC[C@@H]1C[C@H]2[C@H](O)c1ccnc2ccc(OC)cc12	2.26
1439	O=C(N1CCN(c2ccncc2Cl)CC1)N1CCN(S(=O)(=O)c2ccc(C(F)(F)F)cc2)CC1	3.54
1440	O=C(NC1Cc2ccccc2N(CC(CO)CO)C1=O)c1cc2cc(Cl)sc2[nH]1	3.56
1441	CS(=O)(=O)c1ccc(C(=O)Nc2ccc(F)cc2)c[n+]1[O-]	0.84
1442	Nc1nccc(-n2ccc3ccccc32)n1	2.71
1443	CCN(C(=O)Cc1ccc(S(C)(=O)=O)cc1)C1CCN(CCC(c2ccccc2)N2CCC(C(C)=O)CC2)CC1	0.9
1444	CCN(CC)C(=O)c1ccc([C@H](c2cccc(NC(=O)C3CC3)c2)N2CCN(Cc3ccc(F)cc3)CC2)cc1	3.99
1445	CC(C)Cc1ccc(C(C)C(=O)NS(C)(=O)=O)cc1	0.78
1446	Cc1cc(NC(=O)c2ccccc2)n[nH]1	1.75
1447	Cc1cn([C@H]2CCCN([C@@H](CC(C)(C)C)c3ccc(C(=O)O)c(Oc4cccc(Br)c4)c3)C2)c(=O)[nH]c1=O	1.12
1448	C#CC(C)(C)NC(=O)c1sccc1Oc1ccc(F)cc1[N+](=O)[O-]	3
1449	Nc1nc2nc(-c3cccs3)cc(C(F)(F)F)n2n1	2.01
1450	Cc1c(OCC(F)(F)F)ccnc1C[S+]([O-])c1nc2ccccc2[nH]1	2.7
1451	Nc1cc2n[nH]c(=O)n2c2cc(-c3cccs3)ccc12	3.26
1452	Nc1nc2ccc(C(=O)c3ccccc3)cc2[nH]1	2.29
1453	Nc1ccn([C@@H]2O[C@H](CO)[C@@H](O)C2(F)F)c(=O)n1	-1.5
1454	Cn1cc(-c2ccc(O)cc2)c(=O)c2c(O)cc(O)cc21	2.2
1455	CC(C)Oc1ccc2c(=O)c(-c3ccccc3)coc2c1	4.07
1456	NC(=O)c1ccc(N(C(N)=O)c2c(F)cccc2F)nc1-c1ccc(F)cc1F	1.6
1457	Cc1ccc(S(=O)(=O)Nc2c(C(=O)N[C@@H](C)C(C)(C)C)c(C)nn2C2CCSCC2)cc1	1.29
1458	CC[C@@H]1C(=O)OC[C@@H]1Cc1cncn1C	-0.37
1459	Nc1cc2n[nH]c(=O)n2c2cc(-c3ccc[nH]3)ccc12	2.3
1460	CC(C)Cn1c(=O)n(C)c(=O)c2c(C(=O)N3CC[C@@H](O)C3)c(Cc3c[nH]c4ncccc34)sc21	1.71
1461	CCOc1cccc(/C=C2\SC(=O)NC2=O)c1N1CCC[C@@H](N)C1	1.86
1462	CS(=O)(=O)C1(c2cc(N3CCOCC3)nc(-c3cccc4[nH]ccc34)n2)CCOCC1	2.4
1463	CC(C)C(NC(=O)Cn1c(-c2ccccc2)ccc(NC(=O)OCc2ccncc2)c1=O)C(=O)C(F)(F)F	2.41
1464	Cc1ccc(S(=O)(=O)Nc2c(C(=O)NC3CCCCC3)c(C)nn2-c2ccccc2)cc1	1.68
1465	Cn1c(=O)c(Oc2ccc(F)cc2F)cc2cnc(NC3CCOCC3)nc21	2.76
1466	O=c1oc2ccccc2cc1-c1ccccc1	3.22
1467	COc1ccccc1C(=O)NCC12CC3CC(CC(C3)C1)C2	4.43
1468	Cc1nc(C(=O)N2CCCC3(CCN(Cc4ccccc4)CC3)C2)cs1	0.24
1469	CS(=O)(=O)n1c2ccccc2c2cc(NC(=O)N3CCOCC3)ccc21	2.7
1470	CCOc1ccccc1-c1ccc(-c2nc3ccc(F)cc3c(C(=O)O)c2C)cc1	1.18
1471	CN1CCN(C(=O)OC2c3nccnc3C(=O)N2c2ccc(Cl)cn2)CC1	1.1
1472	Nc1ncnc2oc(-c3ccoc3)c(-c3ccco3)c12	3.1
1473	O=C(O)c1ccc(Nc2ncc(Br)c(Nc3ccccc3)n2)cc1	1.65
1474	O=C1C=CC(=O)c2c(O)ccc(O)c21	1.91
1475	O=c1c(-c2ccc(O)c(O)c2)coc2cc(O)ccc12	1.88
1476	O=c1[nH]c([C@@H]2CCCN2)nc2c1oc1ccc(Br)cc12	2.19
1477	Cc1cc(Nc2cc(N3CCN(C)CC3)nc(Sc3ccc(NC(=O)C4CC4)cc3)n2)n[nH]1	3.47
1478	Cc1cnc(NS(=O)(=O)c2ccccc2)c(C)n1	-0.03
1479	CCCC(=O)NCc1cncc(-c2ccc(F)cc2OC)c1	2.9
1480	CC(C)C(NC(=O)Cn1c(-c2ccccc2)ccc(NC(=O)Cc2ccc(C(=O)O)cc2)c1=O)C(=O)C(F)(F)F	0.35
1481	Cc1nnc2n1-c1ccc(Cl)cc1C(c1ccccc1Cl)=NC2	2.34
1482	Cn1cc(C#N)cc1-c1c2c(=O)n(CCO)c(=O)n(CC3CC3)c2nn1Cc1ccnc2ccc(Cl)cc12	3
1483	Cc1cccc(-c2nc3cc(Cl)ccc3[nH]2)n1	4.1
1484	N#Cc1ccc2ccc(=O)n(CCN3CC[C@@H](NCc4ccc5c(n4)NC(=O)CO5)[C@@H](F)C3)c2c1	0.66
1485	Cc1ccc(S(=O)(=O)Nc2c(C(=O)N[C@@H](C)C(C)(C)C)c(C)nn2C2CCN(CC(F)(F)F)CC2)cc1	1.08
1486	C[C@@H]1CN(CC2(C(N)=O)CC2)CCN1S(=O)(=O)c1ccc(C(C)(O)C(F)(F)F)cc1	1.03
1487	c1ccc2[nH]ncc2c1	1.9
1488	COCCS(=O)(=O)c1ccc(Nc2nccc(-c3cnc(C)n3C(C)C)n2)cc1	2.56
1489	O=S(=O)(CCCOCCc1ccccc1)CCNCCc1ccc(O)c2nc(O)sc12	2.61
1490	COc1ccc(OC(F)(F)F)cc1CN[C@H]1CCCN[C@H]1c1ccccc1	2.9
1491	Nc1nc(-c2ccc(Cl)cc2)cs1	3.31
1492	NS(=O)(=O)c1cc(C(=O)O)c(NCc2ccco2)cc1Cl	-0.9
1493	CCOC(=O)c1ccc(N)cc1	1.83
1494	CCN(C(=O)c1cnn(-c2ccccc2)c1NS(=O)(=O)c1ccc(-c2cnco2)cc1)C1CCCCC1	1.46
1495	O=[N+]([O-])c1c(Cl)c(Cl)cc2nc(O)c(O)nc12	0.21
1496	CNCC[C@@H](Oc1cc(OC)ccc1C#N)c1ccccc1	0.87
1497	O=C(COc1ccc(SCCCCCc2ccccc2)cc1)COc1ccc(C(=O)O)cc1	3.63
1498	O=C(NC1Cc2ccccc2N(CCCO)C1=O)c1cc2cc(Cl)sc2[nH]1	3.49
1499	O=C(O)CC[C@@H]1c2ccccc2C[C@H]1NC(=O)c1cc2sc(Cl)c(Cl)c2[nH]1	2.84
1500	OCCO[C@H]1C[C@@H](n2nnc3c(N[C@@H]4C[C@H]4c4ccc(F)c(F)c4)nc(SCCC(F)(F)F)nc32)[C@H](O)[C@@H]1O	4.17
1501	Cc1cc(CNc2ncc(Cl)c(Nc3cc(C)[nH]n3)n2)on1	2.68
1502	O=CN(O)C1(CS(=O)(=O)N2CCN(c3ccc(F)cc3)CC2)CCOCC1	0.85
1503	CC(C)[C@@H](CN1CC[C@@](C)(c2cccc(O)c2)[C@@H](C)C1)NC(=O)[C@H]1Cc2ccc(O)cc2CN1	2.39
1504	CC1(C)[C@@H]2CC[C@@]1(CS(=O)(=O)N1CCN(c3ccc(C(F)(F)F)cn3)CC1)C(=O)C2	3.8
1505	COc1cc2ncc(C(N)=O)c(Nc3cc(C)ccc3F)c2cc1OC	3.16
1506	COc1cc(Oc2ccnc3ccc(F)cc23)ccc1CC(=O)Nc1noc(C)c1C	4.06
1507	Cc1cc(NC(=O)c2ccc(Cl)cc2)n(-c2ccccc2)n1	3.25
1508	O=C(O)c1ccc(-n2ncc(C(=O)NC3C4CC5CC(C4)CC3C5)c2C2CCCC2)cc1	1.72
1509	Cc1c(CCC(=O)O)c(=O)oc2cc(O)ccc12	-0.7
1510	CN(C)CC(O)COc1ccc(Nc2cc(Nc3ccc(F)cc3F)ncn2)cc1	1.48
1511	COc1cc2ncc(C(N)=O)c(Nc3ccccc3Cl)c2cc1OC	2.89
1512	c1ccc2sc(C3CCCNC3)nc2c1	1
1513	O=[N+]([O-])c1cccc2ccc(C(Cl)(Cl)Cl)nc12	3.7
1514	C[C@H](Nc1ncc(Cl)c(Nc2cc(N(C)C)[nH]n2)n1)c1ncc(F)cn1	2.33
1515	CN(C)C(=O)CN1C(=O)C(NC(=O)c2cc3cc(Cl)sc3[nH]2)Cc2ccccc21	3.07
1516	CN(C)c1ccccc1S(=O)(=O)NC(=O)N1CCC(N2CCC(Oc3ccc(Cl)c(Cl)c3)CC2)CC1	1.74
1517	N#Cc1c(-c2ccccc2)nc(SCc2ccccc2)[nH]c1=O	1.56
1518	CC(C)C(NC(=O)Cn1c(-c2ccccc2)ccc(NC(=O)NCc2ccncc2)c1=O)C(=O)C(F)(F)F	2.16
1519	C[C@H](CO)Nc1nc(SCc2cccc(Cl)c2)nc2nc(N)sc12	3.31
1520	CCN1CCN(Cc2ccc(-c3cc4c(N[C@H](C)c5ccccc5)ncnc4[nH]3)cc2)CC1	3.97
1521	OC(CN1CCOCC1)c1ccccc1	1
1522	OCCN1CCN(CCCN2c3ccccc3Sc3ccc(C(F)(F)F)cc32)CC1	3.8
1523	CC(=O)Nc1ccc2ccn(-c3cc(NCCCN4CCCC4)n4ncc(C#N)c4n3)c2c1	1.87
1524	CN(C)c1cccc2c(S(N)(=O)=O)cccc12	1.95
1525	Cc1[nH]c(C(=O)NC2CCN(c3nc(C(=O)O)cs3)CC2)c(Cl)c1Cl	0.14
1526	CCC[C@H](CO)Nc1nc(S[C@@H](C)c2cccc(C#N)c2)nc2[nH]c(=O)sc12	3.7
1527	O=C(NC[C@@H](O)CN1CCC(Oc2ccc(Cl)c(Cl)c2)CC1)c1c[nH]c(=O)cc1C(F)(F)F	2.71
1528	CC(C)C(NC(=O)Cn1c(-c2ccccc2)ccc(NS(=O)(=O)C(F)(F)F)c1=O)C(=O)C(F)(F)F	1.01
1529	O=C(c1ccc(F)cc1)C1CCN(C(=O)c2ccc(F)cc2)CC1	2.9
1530	CC(C(=O)O)c1cccc(C(=O)c2ccccc2)c1	-0.12
1531	Nc1nccc(/C=C/c2ccc(Cl)cc2)n1	3.5
1532	CCCC[C@@H](C=O)NC(=O)[C@H](CC(C)C)NC(=O)[C@H](CC(C)C)NC(C)=O	2.6
1533	O=C(O)c1cccnc1Nc1cccc(C(F)(F)F)c1	1
1534	CC1(C)COCc2sc(N3CCN(C(=O)[C@@H]4CCCC[C@H]4C(=O)NC4(C#N)CC4)CC3)nc21	2.4
1535	COc1cc2ncc(C(N)=O)c(Nc3cccc(F)c3F)c2cc1OC	2.82
1536	O=C(CC12CC3CC(CC(C3)C1)C2)Nc1c(Cl)ccc2nc(CN3CCN(CCO)CC3)ccc12	2.93
1537	N#Cc1cccc(COc2ccc3c(c2)OCCC3=O)c1	2.8
1538	Cc1nc(C)c(-c2ccc([C@H]3CC[C@@H](CC(=O)O)CC3)c(F)c2)nc1C(N)=O	1.2
1539	Cn1cnc([N+](=O)[O-])c1Sc1ncnc2nc[nH]c12	0.19
1540	CC(C)(C)OC(=O)NCCCSC[C@H]1O[C@@H](n2cnc3c(N)ncnc32)[C@H](O)[C@@H]1O	1.2
1541	O=CNc1cc([C@@H](O)CNCCc2ccc(NC[C@H](O)c3ccccc3)cc2)ccc1O	0.02
1542	CCCC1CCCCC(N)=N1	1.1
1543	NNc1nc2ccccc2[nH]c1=O	0.44
1544	COCCOC(=O)C1=C(C)NC(C)=C(C(=O)OC(C)C)C1c1cccc([N+](=O)[O-])c1	3.8
1545	Cc1ncc(-c2ccnc(Nc3ccc(N4CCN(C(=O)CN(C)C)CC4)cc3)n2)n1C(C)C	3.31
1546	COCC[C@H](Oc1ncnc2c1cnn2-c1ccccc1Cl)C(=O)Nc1ccc(C)cn1	3.6
1547	O=C(O)[C@@H](c1ccccc1)N1CCC(CN2CCC(Oc3ccc(Cl)c(Cl)c3)CC2)CC1	2.14
1548	Cn1c(CN2CCN(c3cccc(Cl)c3)CC2)nc2ccccc21	3.75
1549	CCn1c(=O)c2c(=O)cc(O)oc2c2ccccc21	1.13
1550	Cc1ccc(Oc2ccc(C(=O)NCc3ccncc3)cc2)cc1	3.65
1551	N#Cc1ccc(OC2CCN(C[C@H](O)CNC(=O)c3c[nH]c(=O)c4ccccc34)CC2)cc1Cl	2.56
1552	N=C(N)Nc1ccc(Cl)c(Cl)c1	-0.31
1553	CCOC(=O)[C@H](Cc1ccc(O)cc1)NC(=O)c1cccc2ccccc12	3.12
1554	NCCCCN(Cc1nc2ccccc2[nH]1)C1CCCc2cccnc21	0.83
1555	N#Cc1cccc(COc2cc(OCCCN3CCCC3)ccc2C(=O)Nc2cccc(O)c2)c1	2.41
1556	CCN(CC)CCOCCOC(=O)C1(c2ccccc2)CCCC1	1.33
1557	O=C1CCOc2cc(OCc3cccc(F)c3)ccc21	3.4
1558	N#CCNC(=O)[C@@H]1CCCC[C@H]1C(=O)N1CCN(c2ccc(F)cc2)CC1	1.92
1559	FC(F)(F)c1cc(COCC(c2ccccc2)N2CCNCC2)cc(C(F)(F)F)c1	2.9
1560	COc1cc2ncnc(Nc3cccc(C)c3)c2cc1OC	3.5
1561	C[C@H](NC(=O)C1(N)CCN(c2ncnc3[nH]ccc23)CC1)c1ccc(Cl)cc1	2.67
1562	CC(=O)CCCCn1c(=O)c2c(ncn2C)n(C)c1=O	0.22
1563	c1ccc(CNc2nc3ccccc3[nH]2)cc1	2.76
1564	CS(=O)(=O)N1CCOc2cc(COc3ccccc3)cnc21	2.4
1565	OCCOCCN1CCN(C(c2ccccc2)c2ccc(Cl)cc2)CC1	3.08
1566	COc1ccc(CN(CCN(C)C)c2ccccn2)cc1	1.39
1567	O=C(O)c1ccc(CN2CCC(CN3CCC(Oc4ccc(Cl)c(Cl)c4)CC3)CC2)cc1	1.1
1568	O=C(Cc1cc(Nc2ncnc3cc(OCCCN4CCC[C@@H]4CO)ccc23)n[nH]1)Nc1cccc(F)c1F	2.06
1569	O=C(COCc1ccncc1)N1CCC(F)(c2ccc(Cl)cc2)CC1	3.03
1570	COc1cnccc1COc1cnc(N2CCN(C(=O)OC(C)(C)C)CC2)nc1	3.8
1571	NC(=O)CN1C(=O)C(NC(=O)c2cc3cc(Cl)sc3[nH]2)Cc2ccccc21	3.22
1572	Cc1[nH]c(/C=C2\C(=O)Nc3ccc(F)cc32)c(C)c1C(=O)NCCN(C)C	1.75
1573	O=C(Nc1ccc(N2CCOCC2)nc1)c1nnc(Nc2ccc(F)cc2)o1	3
1574	CN(C(=O)Cc1ccccc1)[C@H]1CC[C@@]2(CCCO2)C[C@@H]1N1CCCC1	0.99
1575	COc1ccc(C(=O)Nc2cc(NC(=O)c3cccc(N(C)C)c3)ccc2C)cc1	3.17
1576	C[C@H]([C@H](O)c1ccc(O)cc1)N1CCC(O)(c2ccccc2)CC1	0.91
1577	CCCSc1nc(N2CCC[C@H](CC(=O)O)C2)ccc1C(=O)NC1CCCCC1	2.18
1578	NC(=O)Nc1sc(-c2ccc(F)cc2)cc1C(=O)N[C@H]1CCCNC1	1.76
1579	CCCSc1nc(N2CCCCC2C(=O)O)ccc1C(=O)NC1CCCCC1	1.36
1580	CSc1ccc(OCc2ccccc2)c(/C=C/c2ccc(C(=O)O)cn2)c1	2.45
1581	CNc1cccc(CCOc2ccc(C[C@H](NC(=O)c3c(C)cc(C)cc3C)C(=O)O)cc2)n1	0.52
1582	Cn1cc(S(C)(=O)=O)cc1-c1c2c(=O)n(C)c(=O)n(CC3CC3)c2nn1Cc1ccnc2ccc(Cl)cc12	3.18
1583	CCCc1c(OCc2ccc(/C=C/c3nn[nH]n3)cc2)ccc(C(C)=O)c1O	3.3
1584	CCCNCc1cnc(-c2ccc(C(=O)Nc3ccccc3N)cc2)s1	1.75
1585	COC(=O)CCn1cc(-c2cc(NC3CC3)n3ncc(C#N)c3n2)c2cc(NC(C)=O)ccc21	2.72
1586	CC(C#Cc1ccccc1)n1[nH]c(=O)c2[nH]c3cc(Cl)ccc3c(=O)c2c1=O	1.4
1587	Cc1cc(=O)oc2cc3c(cc12)CCCN3	2.7
1588	N#Cc1cccc(-c2cc(C(F)(F)F)ccc2OCC(=O)O)c1	0.05
1589	CNc1nc(C)c(-c2nc(Nc3cccc(N4CCCNCC4)c3)ncc2C#N)s1	1.64
1590	O=c1[nH]c2c(O)ccc([C@@H](O)CNCCCSCCOCCc3ccccc3)c2s1	2.3
1591	CCNC(=O)c1cc2c(-n3ccc(C(F)(F)F)n3)c(-c3cncc(C(N)=O)c3)cnc2[nH]1	1.81
1592	C#CCN(C)C(C)Cc1ccccc1	2.16
1593	CC(C)C(NC(=O)Cn1c(-c2ccccc2)ccc(NS(=O)(=O)NCc2ccccc2)c1=O)C(=O)C(F)(F)F	2.57
1594	Cc1c(CC(=O)O)c2cc(F)ccc2n1S(=O)(=O)c1ccc(S(C)(=O)=O)cc1	-0.44
1595	CN[C@@H](C)C(=O)N[C@H](C(=O)N[C@H]1CCCN(S(=O)(=O)c2ccccc2)C1)C(C)(C)C	0.9
1596	CCCN(CCC)CCc1cccc2c1CC(=O)N2	0.76
1597	CC(NC(=O)C1(N)CCN(c2ncnc3[nH]ccc23)CC1)c1cccnc1	1.2
1598	O=C(NCCc1ccccc1)c1cc(-n2ncc(=O)[nH]c2=O)ccc1Cl	0.74
1599	Cc1ccc2c(c1)c([S+]([O-])c1ccc(Cl)cc1)c(C)n2CC(=O)O	0.05
1600	CCN(CC)C(=O)c1ccc(C(=C2CCNCC2)c2ccc(Cl)c(Cl)c2)cc1	2.4
1601	N#Cc1cccc(C[C@@H](C(=O)O)N2CCC(CN3CCC(Oc4ccc(Cl)c(Cl)c4)CC3)CC2)c1	2.26
1602	COc1ccccc1C(=O)Nc1nc2ccccc2[nH]1	2.9
1603	CNc1ncc(C(=O)c2ccccc2)s1	2.36
1604	COc1cc2ncnc(Nc3ccccc3)c2cc1OC	3.04
1605	OC(CCN1CCCCC1)(c1ccccc1)C1CC2C=CC1C2	2.49
1606	COc1ccc(CNC(=O)CSc2nc3cccnc3s2)cc1	2.5
1607	CC(=O)N[C@H](C)c1ccc(Nc2ncc3cc(-c4ccncc4)ccc3n2)cc1	3.18
1608	Cc1cccc(Oc2cc(CN3CCC[C@H](n4cc(C)c(=O)[nH]c4=O)C3)ccc2C(=O)O)c1	-0.82
1609	CCCc1c(O)c(O)c(C(=O)O)c2cc(Cc3ccccc3)c(C)cc12	2.6
1610	O=S1NC(Cc2ccc3ccccc3c2)=NO1	1.85
1611	O=C(c1cccc(Cc2n[nH]c(=O)c3ccccc23)c1)N1CCN(c2ccccn2)CC1	2.36
1612	COc1cnc(-c2ccccn2)nc1N(C)c1ccccc1	2.79
1613	CS(=O)(=O)c1ccc([C@@H](C[C@H]2CCC(=O)C2)C(=O)Nc2cnccn2)cc1Cl	1.39
1614	Cc1nc(C(=O)N2CCOC3(CCN(Cc4ccc(Cl)cc4)CC3)C2)cs1	2.17
1615	Cc1ccc(S(=O)(=O)N(C)C(=O)N2CCC(N3CCC(Oc4ccc(Cl)c(Cl)c4)CC3)CC2)cc1	4.49
1616	Cc1ccnc(NCc2ccccc2)c1	3.08
1617	Cn1cc[nH]c1=S	-0.42
1618	COc1cc2ncnc(Nc3cccc(Cl)c3F)c2cc1CN1CCC[C@@H]1C(N)=O	3.58
1619	CS(=O)(=O)c1cccc(Nc2nccc(Nc3c(Cl)ccc4ccoc34)n2)c1	3.7
1620	N=C(N)Nc1ccc(C(=O)Oc2ccc([N+](=O)[O-])cc2)cc1	0.5
1621	CN(C)C(=O)CC(NC(=O)C1(N)CCN(c2ncnc3[nH]ccc23)CC1)c1ccc(Cl)cc1	2.4
1622	O=C(NS(=O)(=O)c1cccc(Cl)c1)N1CCC(N2CCC(Oc3ccc(Cl)c(Cl)c3)CC2)CC1	2.62
1623	O=c1oc2ccc(O)cc2cc1-c1ccc(O)cc1	2.9
1624	CN1C(=O)CN=C(c2ccccc2F)c2cc([N+](=O)[O-])ccc21	2.1
1625	COc1ccc(CNCc2ccc(-c3cc(C(N)=O)c(NC(N)=O)s3)cc2)cc1	2.55
1626	Cc1ncc(-c2ccnc(Nc3ccc(F)cc3)n2)n1C(C)C	3.62
1627	COc1ccc2c(C)nc(=O)n(CCN3CCC(NCc4cc5c(cn4)OCCO5)CC3)c2c1	0.29
1628	COC(=O)C1C(OC(=O)c2ccccc2)CC2CCC1N2C	1.06
1629	O=C(NC[C@@H](O)CN1CCC(Oc2ccc(Cl)c(Cl)c2)CC1)c1c[nH]c2ccccc12	3.91
1630	O=C([C@@H]1CCCN1)N1CCN(c2nc(NCc3ccc(Cl)cc3Cl)c3cccnc3n2)CC1	2.41
1631	N#Cc1cnn(-c2ccccc2)c1NC(=O)CN1CCN(c2ccccc2)CC1	2.3
1632	CNS(=O)(=O)c1ccc2c(C(=O)NC[C@@H](O)CN3CCC(Oc4ccc(Cl)c(Cl)c4)CC3)c[nH]c(=O)c2c1	2.77
1633	OC1(c2ccc(-c3ccccc3)cc2)CN2CCC1CC2	1.5
1634	O=C(c1cccc(Cc2nnc(O)c3ccccc23)c1)N1CCOCC1	1
1635	CSc1ncccc1C(=O)NCc1ccc(C)cc1	2.71
1636	CCC(C)Nc1nc(C#N)nc(N2CCOCC2)c1N	2.8
1637	c1ccc2c(c1)CCN(c1ccncc1)C2	1.4
1638	CC(N)(COP(=O)(O)O)C(=O)O	2.5
1639	O=C(Nc1ccc(F)cc1F)c1cc(Cl)ccc1O	3.6
1640	Cc1nn(-c2ccccc2)c(NS(=O)(=O)C2CCCCC2)c1C(=O)N[C@@H](C)C(C)(C)C	1.75
1641	CCN(CC)C(=O)c1ccc(C(=C2CCN(Cc3ccc(F)cc3)CC2)c2ccc(NC(=O)OC)cc2)cc1	4.01
1642	Cc1ccccc1CCOCCCS(=O)(=O)CCNCCc1ccc(O)c2nc(O)sc12	2.84
1643	CCN(C)C(=O)c1ccc([C@H](c2cccc(NC(=O)C3CCC3)c2)N2CCN(Cc3cccnc3)CC2)cc1	3.27
1644	CC(C)Cn1c(=O)n(C)c(=O)c2cn(Cc3cccc4ccccc34)cc21	4.41
1645	O=c1oc2ccccc2cc1-c1ccc(O)cc1	3
1646	COc1cc(OC)c2nc(C)c3c(c2c1)N(c1ccc(O)cc1)CC3	1.5
1647	COc1ccccc1N1CCN(Cc2c(Br)c(=O)n(-c3ccccc3)n2C)CC1	2.5
1648	O=c1[nH]c2c(O)ccc([C@@H](O)CNCCSCCCNCCc3cccc(Cl)c3)c2s1	0.98
1649	CCc1[nH]c2nc(Sc3cnc4ccc[n+]([O-])c4c3)nc(N3CC[C@@H](N)C3)c2c1Cl	2
1650	NC(=O)c1ccccc1O	1.09
1651	O=C(CN1C(=O)C(NC(=O)c2cc3cc(Cl)sc3[nH]2)Cc2ccccc21)NC(CO)CO	2.61
1652	NC(Cc1ccccc1)c1ccccc1	1.32
1653	CCOC(=O)c1ccc(OC(=O)CCCCCN=C(N)N)cc1	2.41
1654	COc1ccc2c(c1)[nH]c1c(C)nccc12	2.9
1655	O=C(CC12CC3CC(CC(C3)C1)C2)Nc1cccc2nc(NCCNCCO)ccc12	1.79
1656	O=C(Nc1cccc(Cl)c1)N1CCN(C[C@@H]2CCCN(C3CC3)C2)CC1	2.74
1657	Cn1ncc(Cl)c1-c1cc(C(=O)N[C@H](CN)Cc2cccc(F)c2)sc1Cl	2.99
1658	Nc1nc(O)c2ncn(COCCO)c2n1	-1.42
1659	O=C(NC[C@@H](O)CN1CCC(Oc2ccc(Cl)c(Cl)c2)CC1)c1c[nH]nc1C(F)(F)F	3.34
1660	Cc1ccc(COC(=O)N2CC[C@H](CNc3ncccn3)[C@H](F)C2)cc1	3.21
1661	O=c1[nH]n(Cc2ccncc2)c(=O)c2c(=O)c3ccc(Cl)cc3[nH]c12	-0.16
1662	C[C@@H]1C[C@H]2[C@@H]3CCC4=CC(=O)C=C[C@]4(C)[C@@]3(F)[C@@H](O)C[C@]2(C)[C@@]1(O)C(=O)CO	1.87
1663	CS(=O)(=O)c1cccc(Nc2nccc(Nc3cccc4c3OCC4)n2)c1	3
1664	COc1cccc(S(=O)(=O)c2c(C)n(CC(=O)O)c3ccc(C)cc23)c1	-0.42
1665	Clc1ccc2c(c1)CCc1cccnc1C2=C1CCNCC1	1.48
1666	N#CC1(NC(=O)[C@@H]2CCCC[C@H]2C(=O)N2CCN(c3nc4ccncc4s3)CC2)CC1	1.6
1667	O=C(C1CCN(c2nnc(-n3cccc3)s2)CC1)N1CCN(Cc2ccc3c(c2)OCO3)CC1	2.5
1668	O=C1COC2(CCN(S(=O)(=O)c3ccc(-c4ccc5cccnc5c4)cc3)CC2)CN1C1CC1	3.24
1669	COc1cc2c(Nc3ccc(Br)cc3F)ncnc2cc1OC[C@@H]1CCCN(C)C1	3.05
1670	N=C(N)NC(=O)c1nc(Cl)c(NCc2ccncc2)nc1N	-0.51
1671	O=C(COc1ccccc1O)NC1CCCC1	2.31
1672	O=C(NCC12CC3CC(CC(C3)C1)C2)c1cc(C2CCNCC2)ccc1Cl	1.58
1673	CCC[C@@H](CNC(=O)c1nc(Cl)c(N)nc1N)[N+](C)(C)CCCc1ccc(OC)cc1	0.4
1674	Oc1ccc(-c2nc3ccc(O)cc3o2)cc1	3.3
1675	NC(=O)c1sc(-c2ccsc2)cc1NS(=O)(=O)c1ccc(C(F)(F)F)cc1	2.39
1676	Cc1ccc(NC(=O)c2ccno2)cc1-n1cnc2ccc(N3CCN(C)CC3)cc2c1=O	1.75
1677	CS(=O)(=O)c1ccc2c(c1)N(CCN1CCC(NCc3ccc4c(n3)NC(=O)CO4)CC1)C(=O)CO2	-0.51
1678	CNC1=Nc2ncccc2C(c2cc[nH]c2)=NC1c1cccs1	1.73
1679	CC1(C)CC(=O)c2c(nc3ccccc3c2N)C1	3
1680	C[C@H]1O[C@@H](n2cnc3c(N)nc(OCC4CC45CC5)nc32)[C@H](O)[C@H]1Cl	3.68
1681	CCS(=O)(=O)c1ccc(-c2cc(Cl)ccc2OCC(=O)O)c(F)c1	-0.92
1682	C[S+]([O-])CCN1C(=O)C(NC(=O)c2cc3cc(Cl)sc3[nH]2)Cc2ccccc21	3.17
1683	O=C(NCC12CC3CC(CC(C3)C1)C2)c1ccnc(N2CCNCC2)c1Cl	1.77
1684	COc1ccc(N2CCN(C(=O)[C@@H]3CCCC[C@H]3C(=O)NC3(C#N)CC3)[C@H](C)C2)cc1OC	1.85
1685	O=C(NC[C@@H](O)CN1CCC(Oc2ccc(Cl)c(Cl)c2)CC1)c1c[nH]c(=O)c2ccccc12	3.42
1686	Nc1cc(C(=O)Nc2cccc(-c3nnn[nH]3)c2)cc(C(F)(F)F)c1	0.2
1687	CCN(CC)C(=O)c1ccc(C(=C2CCNCC2)c2ccccc2)cc1	1.2
1688	Cc1ncc(-c2ccnc(Nc3ccc(N(C)C)cc3)n2)n1C(C)C	3.51
1689	O=C(c1ccc(F)cc1)N1CCC[C@H](c2nc(-c3ccc(F)cc3)no2)C1	3.73
1690	Cc1cc2c(C(C)C)c(O)c(O)c(C=O)c2c(O)c1-c1c(C)cc2c(C(C)C)c(O)c(O)c(C=O)c2c1O	2.75
1691	CN(CCCOCCOCCc1ccccc1)CCc1ccc(O)c2nc(O)sc12	2.44
1692	CC(C)C(NC(=O)Cn1c(-c2ccccc2)ccc(NC(=O)NCc2ccc[n+]([O-])c2)c1=O)C(=O)C(F)(F)F	1.48
1693	CCS(=O)(=O)c1ccc(Oc2cc3nc(-c4ccccn4)[nH]c3cc2CN2C(=O)CCC2=O)cc1	2
1694	O=S(=O)(CCCNCCc1ccc(O)c2nc(O)sc12)NCCSCCc1ccccc1	1.77
1695	O=C(NCC12CC3CC(CC(C3)C1)C2)c1cc(-n2ncc(=O)[nH]c2=O)ccc1Cl	2.1
1696	CCc1nc2c(N)nc3ccccc3c2n1CC(C)(C)O	1.38
1697	Cc1ccccc1C[C@@H](C(=O)O)N1CCC(CN2CCC(Oc3ccc(Cl)c(Cl)c3)CC2)CC1	2.54
1698	CNC(=O)c1nc(-c2ccc(Cl)c(S(=O)(=O)Nc3cccc(F)c3F)c2)cnc1N	2.8
1699	O=C(Nc1ccc(Cl)nc1)c1ccc(F)c(Cl)c1	3.64
1700	COc1cc(N2CCNCC2)ccc1Nc1ncc(Cl)c(-c2cnc3ccccn23)n1	2.4
1701	Cc1cccc(Nc2ccncc2S(=O)(=O)NC(=O)NC(C)C)c1	0.3
1702	O=C(O)c1cncc(-c2cnc3[nH]c(C(=O)NC4CC4)cc3c2-n2ccc(C(F)(F)F)n2)c1	-0.98
1703	NC(=O)c1sc(-c2ccc(Cl)cc2)cc1N	3.3
1704	Cn1c(=O)n(Cc2ccc(Br)cc2)c2ccccc21	2.81
1705	Nc1nc2cc3c(cc2s1)CCN(Cc1cccc(F)c1)CC3	3.3
1706	COc1cc2ncnc(Nc3cccc(Cl)c3F)c2cc1OC1CCN(S(C)(=O)=O)CC1	2.82
1707	CC1(C)C(=O)Nc2ccccc21	2.3
1708	CNS(=O)(=O)CCc1ccc2[nH]cc(C3CCN(C)CC3)c2c1	0.48
1709	Cc1ccc2c(c1)c(-c1cc(C)nc3ccccc13)c(C)n2CC(=O)O	2.88
1710	c1cc(Nc2ccnc(Nc3cc(N4CCOCC4)cc(N4CCOCC4)c3)n2)c2cn[nH]c2c1	3.05
1711	CC(C)(C)CNc1nc(C#N)nc(N2CCOCC2)c1N	3.08
1712	O=C1Nc2ccc(S(=O)(=O)N3CCC[C@H]3CNc3ccccc3)cc2C1=O	2.4
1713	O=C(c1ccc(Cl)cc1)C1CCN(C(=O)c2ccc(F)cc2)CC1	3.49
1714	O=C(O)COc1ccc(Cl)cc1CN1CCN(S(=O)(=O)c2ccccc2)CC1	0.49
1715	CC(C)(N)C(=O)N[C@H](COCc1ccccc1)C(=O)N1CCC2(CC1)CN(S(C)(=O)=O)c1ccccc12	1.4
1716	C[C@H]1C[C@@H](NS(=O)(=O)c2cc(Br)ccc2Br)CN1C#N	2.13
1717	Cc1cc(Nc2cnc(C#N)c(N[C@@H](C)c3ccc(F)cn3)n2)n[nH]1	2.51
1718	CC(=O)Nc1ccc2ccn(-c3cc(NC4CC4)n4ncc(C#N)c4n3)c2c1	3.29
1719	CCn1c(=O)c2c(-c3cncn3C)n(Cc3ccnc4ccc(Cl)cc34)nc2n(CC2CC2)c1=O	2.87
1720	CCCNC[C@H](O)COc1ccccc1C(=O)CCc1ccccc1	1.69
1721	O=S(=O)(Nc1ncc(Cl)s1)c1cc(F)c(Oc2ccc(F)cc2-c2cn[nH]c2)cc1F	2.7
1722	Cc1cn([C@H]2CCCN([C@H](CC3CCOCC3)c3ccc(C(=O)O)c(Oc4cccc(Cl)c4)c3)C2)c(=O)[nH]c1=O	-0.25
1723	CC(=O)Nc1nc(-c2cccs2)cs1	2.77
1724	O=C1c2ccccc2CN1C1CCN(CCC(c2ccccc2)c2ccccc2)CC1	4.1
1725	O=C(O)[C@H](Cc1ccccc1F)N1CCC(CN2CCC(Oc3ccc(Cl)c(Cl)c3)CC2)CC1	2.58
1726	COc1cc2cc(-c3ccc(O)cc3O)nc(C)c2cc1OC	3.9
1727	O=C(O)Cc1cccc(N2CCC(CN3CCC(Oc4ccc(Cl)c(Cl)c4)CC3)CC2)c1	1.58
1728	Cc1ncc(-c2nc(Nc3ccc(N4CCN(C(=O)CO)CC4)cc3)ncc2F)n1C(C)C	2.19
1729	Cn1cncc1-c1c2c(=O)n(C3CC3)c(=O)n(CC3CC3)c2nn1Cc1ccnc2ccc(Cl)cc12	3.53
1730	Cc1cn([C@H]2CCCN(S(=O)(=O)c3ccc(O)c(Oc4cccc(F)c4)c3)C2)c(=O)[nH]c1=O	1.6
1731	CC(C)[C@H](NC(=O)CCc1ccccc1)C(=O)N1CCCC1	2.49
1732	COc1ccccc1C(=O)Nc1nc2ccccc2s1	3.61
1733	COc1ccc(-c2csc(N(CCCN3CCOCC3)C(=O)c3ccco3)n2)cc1	3.34
1734	O=C1CCCc2nc(C#Cc3ccccc3)ccc21	3.53
1735	c1ccc(-c2cc(NCCCCNc3cc(-c4ccccc4)nc4ccccc34)c3ccccc3n2)cc1	3.65
1736	CCCSc1nc(N[C@@H]2C[C@H]2c2ccccc2)c2nnn([C@@H]3C[C@H](CO)[C@@H](O)[C@H]3O)c2n1	3.99
1737	NC(=O)c1cccc(C[C@@H]2C[C@@H]3CC[C@H](C2)N3Cc2ccccc2)c1	1.19
1738	CCc1ccc(CCNCCCSCCNC[C@H](O)c2ccc(O)c3[nH]c(=O)sc23)cc1	0.86
1739	Cc1cc(S(=O)(=O)N2CCN(C)CC2)ccc1-c1cnc(N)c(C(=O)Nc2cccnc2)n1	2.6
1740	Cc1ncc(-c2ccnc(Nc3ccc(N4CCN(C(=O)[C@H](C)O)CC4)cc3)n2)n1C(C)C	2.15
1741	CN(C)c1nc(N(C)C)nc(N(C)C)n1	2.44
1742	COC(=O)c1ccc(NC(=O)c2cc(OC)c(OC)c(OC)c2)cc1	3.2
1743	O=C1CN(N=Cc2ccc(-c3ccc([N+](=O)[O-])cc3)o2)C(O)=N1	1.35
1744	NC1(C(=O)NC(CCCN2CCCC2)c2ccc(Cl)cc2)CCN(c2ncnc3[nH]ccc23)CC1	1.3
1745	Cc1ccc(S(=O)(=O)NC(=O)N2CCC(N3CCC(Oc4ccc(Cl)cc4C)CC3)CC2)cc1	1.79
1746	O=C(Cc1ccccc1)Nc1nccs1	2.5
1747	O=C1[C@H]2[C@H]3CC[C@H](C3)[C@H]2C(=O)N1[C@H]1CC[C@H](C(=O)Nc2cccc3cccnc23)CC1	3.94
1748	O=C(Cc1cccc2ccccc12)Nc1ccccc1	3.9
1749	CNC1(C)C2CCC(C2)C1(C)C	-0.84
1750	N[C@@H](CC(=O)N1CCn2c(nnc2C(F)(F)F)C1)Cc1cc(F)c(F)cc1F	0.31
1751	CC(C)C(=O)Nc1ccc([N+](=O)[O-])c(C(F)(F)F)c1	3.46
1752	Cc1nc(CSc2nc(N[C@H](C)CO)c3sc(N)nc3n2)cs1	1.73
1753	C[C@@H](Oc1cccc2ncnc(Nc3ccc4c(cnn4Cc4cscn4)c3)c12)C(=O)N1CCOCC1	2.81
1754	O=S(=O)(Nc1cccnc1)c1cccs1	0.54
1755	O=C(Cn1cnc2ccccc21)c1ccc(Br)cc1	3.22
1756	CCCc1nc2c(N)nc3ccccc3c2s1	4.09
1757	COc1cc(CNc2nc3ccccc3[nH]2)cc(OC)c1OC	2.36
1758	CCn1c2ccccc2c2cc(NC(=O)C(C)C)ccc21	4.2
1759	C=CCN(C(=O)NCc1ccc(OC)cc1)C1CCN(CCC(c2ccccc2)c2ccccc2)CC1	3.6
1760	CN(c1cccc(CO)c1)c1ccnc(Nc2cc(N3CCOCC3)cc(N3CCOCC3)c2)n1	2.6
1761	Cn1nnc(-c2ccc(-c3ccc(N4C[C@H](COc5ccon5)OC4=O)cc3F)cn2)n1	1.24
1762	CS(=O)(=O)c1cccc(Nc2nccc(Nc3cccc4c3OCO4)n2)c1	2.83
1763	CCN(C(=O)c1ccc(-c2ccc(Cl)cc2)o1)c1ccc(N2CCNCC2)cc1	3.3
1764	CC(C)(C)OC(=O)N1CCN(c2ncc(OCc3ccncc3F)cn2)CC1	3.6
1765	Cc1ccc(CN2C(=O)CCSc3ccc(Cl)cc32)cc1	3.7
1766	CC(C)C(NC(=O)Cn1c(-c2ccccc2)cc2c(O)nc(O)nc2c1=O)C(=O)C(F)(F)F	1.88
1767	NC(=O)c1cccc(C[C@H]2C[C@@H]3CC[C@H](C2)N3Cc2ccccc2)c1	1.11
1768	Cc1n[nH]c(C)c1Cc1sc2c(c1C(=O)N1C[C@H](O)CO1)c(=O)n(C)c(=O)n2CC(C)C	1.07
1769	O=c1c2cnn(-c3ccccc3)c2nc(-c2ccco2)n1-c1ccccc1	3.29
1770	O=C(c1c[nH]c(=O)c2ccccc12)N1CCC(N2CCC(Oc3ccc(Cl)c(Cl)c3)CC2)CC1	3.51
1771	COc1ccc2c(c1)N(CCN1CCC(NCc3ccc4c(n3)NC(=O)CO4)CC1)C(=O)CO2	0.87
1772	Nc1ncnc2c1nc(Sc1nc3cccc(Cl)c3s1)n2CCO	2.37
1773	COc1cc2ncnc(Nc3cc(NC(=O)c4cccc(N5CCOCC5)c4)ccc3C)c2cc1OC	3.6
1774	Cc1ccccc1C(=O)N1CCN(c2ccccn2)CC1	2.18
1775	O=C(O)[C@H](Cc1ccc(F)cc1)N1CCC(CN2CCC(Oc3ccc(Cl)cc3Cl)CC2)CC1	2.6
1776	COc1ccc(-c2cncc(CNC3CCCC3)n2)c(OC)c1	2.14
1777	C1=CCC(c2cc3ccccc3o2)CNC1	1.94
1778	O=C(NC[C@@H](O)CN1CCC(Oc2ccc(Cl)c(Cl)c2)CC1)c1cc(=O)[nH]c2ccccc12	3.48
1779	CC(C)c1ncc(NC(=O)OCc2ccccc2)c(=O)n1CC(=O)NC(C(=O)C(F)(F)F)C(C)C	2.63
1780	CCN(CC)C(=O)c1ccc([C@H](c2cccc(NC(=O)C3CC3)c2)N2CCN(CCOC)CC2)cc1	2.35
1781	CN(C)CCCNS(=O)(=O)c1ccc(Nc2nccc(-c3cnc4ccccn34)n2)cc1	1.9
1782	Cc1nc2ncnn2c(O)c1CCOC(=O)c1c(F)cccc1F	0.16
1783	COc1ccc(F)c(F)c1C(=O)c1cnc(NC2CCN(S(C)(=O)=O)CC2)nc1N	2.08
1784	NC(=O)c1cccc(N[C@@H]2C[C@@H]3CC[C@H](C2)N3Cc2ccccc2)c1	1.01
1785	Clc1ccc(-c2cn3ccccc3n2)cc1	4
1786	CCN1C(=O)NC(c2ccccc2)C1=O	1
1787	Cc1ccc(NC(=O)c2ccnc(N3CCOCC3)c2)cc1Nc1ccnc(OC2CCN(C)CC2)n1	1.8
1788	Nc1nc(NCc2ccccc2)nc2c1nc(O)n2Cc1ccccc1	3.69
1789	Cc1nc(C)c(-c2ccc([C@H]3CC[C@@H](CC(=O)O)CC3)c(Cl)c2)nc1C(N)=O	1.7
1790	FC(F)(F)c1cc(CO[C@H]2CCCN[C@H]2c2ccccc2)cc(C(F)(F)F)c1	3.6
1791	CN(CCOc1ccc(C[C@H](Nc2ccccc2C(=O)c2ccccc2)C(=O)O)cc1)c1nc2ccccc2o1	2.47
1792	Cc1cccc(C(=O)N2CCC(C(=O)c3ccc(F)cc3)CC2)c1	3.4
1793	Clc1ccc([C@H]2CC=CCNC2)cc1Cl	1.95
1794	CCN(CC)c1ncnc2c1ncn2Cc1c(Cl)cccc1Cl	1.25
1795	COc1cc(N2CC3CNCC(C2)O3)ccc1Nc1ncc(Cl)c(-c2cnc3ccccn23)n1	2.3
1796	CCCS(=O)(=O)N1N=Cc2cc(Cl)ccc2B1O	-0.4
1797	CNc1ccc2ncc(-c3cccc(O)c3)n2n1	2.99
1798	CC(=O)Nc1cccc(Nc2nc(NC3CC3)n3ncc(C#N)c3n2)c1	2.1
1799	CN1CCN(C(=O)c2cc(Cc3n[nH]c(=O)c4ccccc34)ccc2F)CC1	1.03
1800	C[C@H](CO)Nc1nc(SCc2cccc(F)c2F)nc2nc(N)cnc12	2.89
1801	O=C(O)c1ccc(Nc2ncc3c(n2)-c2ccc(Cl)cc2C(c2c(F)cccc2F)=NC3)cc1	2.58
1802	Cc1cc(CN2Cc3ccccc3C2C(=O)Nc2ccc(Cl)cc2Cl)ccc1OCC(=O)O	2.62
1803	CCO/N=C(\c1ccc(Br)cc1)C1CCN(C2(C)CCN(C(=O)c3c(C)cc[n+]([O-])c3C)CC2)CC1	2.14
1804	CC(C)C(NC(=O)Cn1c(-c2ccccc2)ccc(N)c1=O)C(=O)C(F)(F)F	1.74
1805	COc1cc2nc(Nc3ccc([C@@H](C)NC(C)=O)cc3)ncc2cc1-c1ccncc1	3.11
1806	Cc1cccc(NS(=O)(=O)c2cccc3nonc23)c1	3
1807	CCOc1cc2nnc(C(N)=O)c(Nc3cc(C)ccc3F)c2cc1N1CCN(C)CC1	3.02
1808	O=S(=O)(Nc1ccccc1-c1ccccc1)c1ccccc1	3.96
1809	Cc1c(Cl)ccc(OC2CCN(C[C@H](O)CNC(=O)c3c[nH]c(=O)cc3C(F)(F)F)CC2)c1Cl	3.14
1810	Cc1ccc(-c2ccc(N)nn2)cc1NC(=O)c1ccc(OCc2ccccn2)cc1	2.47
1811	CC[C@H](NC(=O)c1c([S+](C)[O-])c(-c2ccccc2)nc2cc(Cl)ccc12)c1ccccc1	3.07
1812	CCS(=O)(=O)c1ccc(-c2cc(C(F)(F)F)ccc2OCC(=O)O)c(C)c1	-0.45
1813	Cc1cc(CNc2nccc(Nc3cc(C)[nH]n3)n2)on1	1.86
1814	Clc1ccc(Nc2nnc(Cc3ccncc3)c3ccccc23)cc1	3.7
1815	Nc1ccc(S(=O)(=O)c2ccc(N)cc2)cc1	0.88
1816	Cc1nc(C)c(-c2ccc([C@H]3CC[C@H](CCC(=O)O)CC3)cc2)nc1C(N)=O	1.6
1817	NC(=O)Cc1ccccc1	0.3
1818	CC(=O)O[C@H]1CC[C@]2(C=O)[C@H]3CC[C@]4(C)[C@@H](C5=CC(=O)OC5)CC[C@]4(O)[C@@H]3CC[C@]2(O)C1	0.64
1819	COc1cc2ncnc(Nc3cccc(Cl)c3F)c2cc1CN1CCC[C@H]1C(N)=O	3.58
1820	CC(C)NNC(=O)c1ccncc1	0.33
1821	NC(=O)Nc1sc(-c2ccccc2)cc1C(N)=O	2.42
1822	Nc1ccc(N=Nc2ccccc2)c(N)n1	3.22
1823	CCCSc1nc(NC)ccc1C(=O)NC1C2CC3CC1CC(O)(C3)C2	3.27
1824	N#Cc1cc(O)cc2nc(-c3ccc(O)cc3)oc12	3.6
1825	O=C1CCOc2nc(C#CC3CCCCC3)ccc21	3.3
1826	Cc1ccc(-n2[nH]c(=O)c3cccnc32)cc1	2.1
1827	COc1ccc(C(=O)N2CCCC2=O)cc1	0.93
1828	CNCc1ccc(-c2[nH]c3cc(F)cc4c3c2CCNC4=O)cc1	1.17
1829	N#Cc1ccc(NC(=O)Nc2ccccc2Br)c2nn[nH]c12	1.64
1830	Nc1ccc(Cl)c(-c2nc3ncccc3o2)c1	1.97
1831	C[C@@H]1CN(Cc2ccc(F)cc2)CCN1C(=O)COc1ccc(Cl)cc1NC(N)=O	1.91
1832	CN(C(=O)c1ccncc1)C1CCN(CCC(c2ccccc2)c2ccccc2)CC1	2.8
1833	Cc1ncc(-c2ccnc(Nc3ccc(C#N)cc3)n2)n1C(C)C	3.62
1834	N#Cc1cccc(NCC(=O)Nc2c(Cl)ccc3nc(N4CC[C@@H](O)C4)ccc23)c1	2.39
1835	N#CC1(NC(=O)[C@@H]2CCCC[C@H]2C(=O)N2CCN(c3nc4c(s3)COCC4)CC2)CC1	1.42
1836	Cc1ccc(C(=O)Oc2ccc(C(O)CNC(C)(C)C)cc2OC(=O)c2ccc(C)cc2)cc1	3.57
1837	Cc1ccc(S(=O)(=O)Nc2c(C(=O)N[C@@H](C)C(C)(C)C)c(C)nn2C2CCS(=O)(=O)CC2)cc1	0.25
1838	Cc1ccc(CO)cc1N(c1ccnc(Nc2cc(N3CCOCC3)cc(N3CCOCC3)c2)n1)C(C)C	3.9
1839	NC(=O)c1cc(C(N)=O)n(-c2cccc(-c3cc(C(F)(F)F)ccc3C(F)(F)F)c2)n1	3.4
1840	CS(=O)(=O)Nc1cc(Nc2nccc(Nc3c(Cl)ccc4c3OCO4)n2)cc(C(N)=O)c1	2.28
1841	O=C(Nc1cccc(-c2nnn[nH]2)c1)c1cc(O)cc(C(F)(F)F)c1	0.8
1842	N#Cc1cccc(-c2cccc(-c3nn[nH]n3)c2)c1	0.7
1843	N#Cc1cnn(-c2ccccc2)c1NC(=O)c1ccccc1F	1.7
1844	Cc1cc(=O)[nH]c2ccccc12	1.9
1845	C[C@H](Cc1cccc(CC(=O)NC23CC4CC(CC(C4)C2)C3)c1)NC[C@H](O)c1ccc(O)c(CO)c1	2.4
1846	Oc1ccc(-c2ccc(C3(O)CN4CCC3CC4)cc2)cc1	0.95
1847	CNC(=O)c1snnc1-c1ccccc1	1.23
1848	CC(C)(C)NC(=O)Nc1cccc(Cn2[nH]c(=O)c3[nH]c4cc(Cl)ccc4c(=O)c3c2=O)c1	1.77
1849	CN1CCN(c2nc(NCCNc3ccc([N+](=O)[O-])cc3)c3ccccc3n2)CC1	2.91
1850	O=C(O)CSCC(=O)Nc1nc(-c2ccc(F)cc2)cs1	-0.2
1851	O=C(N[C@@H](Cc1ccc(OCCNc2ccccn2)cc1)C(=O)O)c1c(Cl)cccc1Cl	-0.48
1852	CC(C)(C)OC(=O)N1CCC(c2ncc(OCc3ccc(S(C)(=O)=O)cc3)cn2)CC1	2.8
1853	Nc1ncnc2c1c(COc1cccc(Cl)c1)nn2C1CCOCC1	3.17
1854	N#Cc1cnn2c(NC3CC3)cc(-n3ccc4ccc(CO)cc43)nc12	3.09
1855	CNS(=O)(=O)Cc1ccc2[nH]cc(CCN(C)C)c2c1	-0.96
1856	NC1(c2ccc(-c3c(-c4ccccc4)ccc4ccnn34)cc2)CCC1	2.9
1857	CCC(c1nc2ccoc2c(=O)n1Cc1ccccc1)N(CCCN)C(=O)c1ccc(C)cc1	1.37
1858	COc1ccc(N(C(=O)c2occc2C)C(C(=O)NC[C@@H](C)O)c2ccccc2F)c(OC)c1	2.04
1859	CCCc1c(OCc2cccc(NC(=O)Cc3ccccc3C(=O)O)c2)ccc(C(C)=O)c1O	2.95
1860	Cc1ncccc1Oc1ncnc(OC2C3COCC2CN(C(=O)OC(C)C)C3)c1C	3.1
1861	C[C@H](CO)Nc1nc(SCc2cccc(F)c2F)nc2nccnc12	3.15
1862	NC(=O)c1cnc(-c2ccc(C3(N)CCC3)cc2)c(-c2ccccc2)c1	1.3
1863	C[C@H](CO)Nc1nc(SCc2ccccc2)nc2[nH]c(=O)sc12	2.86
1864	O=c1c2sccc2n(CC2COc3ccccc3O2)c(=O)n1O	1.44
1865	c1ccc(Sc2ccc3ccccc3n2)cc1	3.92
1866	O=C(Nc1cccc(-c2nnn[nH]2)c1)c1cc(C(F)(F)F)cc2[nH]cnc12	1.1
1867	C[C@@H]1CN(c2ccccc2)CCN1C(=O)[C@@H]1CCCC[C@H]1C(=O)NC1(C#N)CC1	2.35
1868	COc1ccc2ncc(=O)n(CCN3CC[C@@H](NCc4cc5c(cn4)OCCO5)[C@H](O)C3)c2c1	0.9
1869	C[C@@H](C(=O)NCCN1CCCC1)c1ccc(OS(=O)(=O)C(F)(F)F)cc1	1.64
1870	O=C(O)CCc1ccc(OCc2cccc(Br)c2)cc1	1.67
1871	Cc1ncc(-c2nc(Nc3ccc(C(=O)NC4CCN(C)CC4)cc3)ncc2F)n1C(C)C	2.13
1872	O=c1cc(-c2ccccc2)oc2ccc(O)cc12	3.6
1873	CC(C)C(NC(=O)Cn1c(-c2cccs2)ncc(NC(=O)OCC(F)(F)F)c1=O)C(=O)C(F)(F)F	2.32
1874	O=C(NO)C1COC(c2ccc(F)c(C(F)(F)F)c2)=N1	1.53
1875	NS(=O)(=O)c1ccc(Nc2nccc(-c3ccccc3)n2)cc1	2.86
1876	CC(C)[N+](C)(CCOC(=O)C1c2ccccc2Oc2ccccc21)C(C)C	0.2
1877	CCN(CC)CCNc1ncnc2c1sc1nc(N3CCOCC3)c3c(c12)CCCC3	3.3
1878	CC(=O)NC1CC(C)N(C(=O)c2ccccc2)c2ccccc21	2
1879	CCN(CCNCCc1ccc(O)c2[nH]c(=O)sc12)C(=O)CCOCCc1ccccc1	1.92
1880	OCC(O)CN1CCN(c2ccccc2)CC1	0.4
1881	C[C@@H](CO)Oc1cc(Oc2ccc(S(C)(=O)=O)cc2)cc(C(=O)Nc2nccs2)c1	2.63
1882	COc1cc(OC)c(S(=O)(=O)N2c3ccccc3CCC2C)cc1NC(=O)Cc1ccnc(F)c1	2.49
1883	Cc1sc2ncnc(N3CCN(c4ncccn4)CC3)c2c1C	3.66
1884	Nc1n[nH]c2nnc(-c3ccccc3)c(-c3ccccc3)c12	2.6
1885	O=C(NCc1ccncc1)c1ccc(Oc2ccc(C#C[C@@]3(O)CN4CCC3CC4)cc2)cc1	2.31
1886	C[C@H]1COCCN1c1cc(C2(S(C)(=O)=O)CC2)nc(-c2cccc3[nH]ccc23)n1	2.8
1887	Cc1ccc(C[C@@H](C(=O)O)N2CCC(CN3CCC(Oc4ccc(Cl)c(Cl)c4)CC3)CC2)cc1	3.01
1888	COc1ccc(CC(=O)NC(N/C(=N/C#N)Nc2ccccc2C)C(C)(C)C)cc1OC	2.48
1889	CN1Cc2ccccc2C(c2ccc(Cl)cc2)C1	3.64
1890	O=c1oc2ccccc2c(O)c1Cc1c(O)c2ccccc2oc1=O	1.22
1891	C[C@@H](Oc1ccc(S(C)(=O)=O)cc1C(=O)N1CCN(c2ncc(C(F)(F)F)cc2F)CC1)C(F)(F)F	3.49
1892	N#CCNC(=O)[C@@H]1CCCC[C@H]1C(=O)N1CCCCC1	0.9
1893	CNc1cccc(CCOc2ccc(C[C@H](NC(=O)c3ccccc3Cl)C(=O)O)cc2)n1	-0.31
1894	Cc1nnc2n1-c1ccc(Cl)cc1C(c1ccccc1)=NC2	1.98
1895	COCCC(=O)N[C@@H](C)c1ccc(Nc2ncc3cc(-c4ccncc4)ccc3n2)cc1	3.05
1896	COc1ccc([C@]2(C#N)CC[C@@H](C(=O)O)CC2)cc1OC1CCCC1	0.76
1897	Cc1ccc(C#N)cc1-c1cc(C(F)(F)F)ccc1OCC(=O)O	0.15
1898	CS(=O)(=O)c1cccc(Nc2nccc(Nc3cccc4[nH]ncc34)n2)c1	2.91
1899	CN[C@@H](C)C(=O)N[C@H](C(=O)N[C@H]1CCCN(C(=O)c2ccccc2)C1)C1CCCCC1	0.87
1900	CN1CC=C(c2cccc(O)c2)CC1	0.53
1901	O=C(O)COc1ccc(C(=O)c2cccs2)c(Cl)c1Cl	-0.84
1902	COCC1=C(C(=O)OC(C)OC(=O)OC(C)C)N2C(=O)[C@@H](NC(=O)/C(=N\OC)c3csc(N)n3)[C@H]2SC1	1.7
1903	OCCN(CCO)c1nc(N2CCCCC2)c2nc(N(CCO)CCO)nc(N3CCCCC3)c2n1	3.97
1904	Cc1cccc2c(CCNCc3cccc(CCNC[C@H](O)c4ccc(O)c5[nH]c(=O)sc45)c3)c[nH]c12	1.13
1905	Cc1cn([C@H]2CCCN(S(=O)(=O)c3ccc(CO)c(Oc4cccc(Cl)c4)c3)C2)c(=O)[nH]c1=O	2.69
1906	Nc1ncnc2c1ncn2[C@@H]1O[C@H](CSCCCNC(=O)Nc2ccccc2)[C@@H](O)[C@H]1O	1.9
1907	CCN(CC)CCOC(=O)C1(C2CCCCC2)CCCCC1	3.72
1908	CC12NC(Cc3ccccc31)c1ccccc12	1.7
1909	COc1ccc(N2CCN(C(=O)[C@@H]3CCCC[C@H]3C(=O)NC3(C#N)CC3)CC2)cc1	1.74
1910	CC(C)c1ccc2[nH]c3c(c2c1)CN(C(=O)[C@@H]1CCCC[C@H]1C(=O)NC1(C#N)CC1)CC3	4.1
1911	Cc1nc2ccccn2c1-c1ccnc(Nc2cccc(Cl)c2)n1	2.7
1912	O=C(O)COc1ccc(Cl)cc1CN1CCN(S(=O)(=O)c2ccc(F)cc2)CC1	0.99
1913	O=S(=O)(CCCNCCc1ccc(O)c2nc(O)sc12)NCCOCCSc1ccccc1	1.84
1914	COCc1ccoc1C(=O)N(c1ccc(OC)cc1OC)C(C(=O)NC[C@@H](C)O)c1ccccc1F	1.98
1915	Cc1ccc(NC(=O)c2cccc(N(C)C)c2)cc1NC(=O)c1ccc(O)cc1	2.65
1916	COc1cc(F)ccc1-c1cncc(CNC2CCC2)n1	2.23
1917	C=CC(=O)Nc1ccc2ncnc(Nc3cccc(C)c3)c2c1	3.7
1918	COc1cc2c(cc1OC)C(=O)C(CC1CCN(Cc3ccccc3)CC1)C2	2.41
1919	CCN(CC)C(=O)c1ccc2[nH]c(-c3cc(C)cc(C)c3)c(CCNCCCCc3ccncc3)c2c1	3.3
1920	Cc1cnc(Nc2ccc(OCCN3CCCC3)cc2)nc1Nc1cccc(S(=O)(=O)NC(C)(C)C)c1	2.11
1921	Nc1ncc(-c2cnn(C3CCNCC3)c2)cc1-c1nc2ccccc2o1	1.85
1922	N#Cc1cnn2c(N)cc(-c3ccc(F)cc3)nc12	2.23
1923	C[C@H](c1ccc(F)cc1CCCC(=O)O)N(c1cc(F)ccc1F)S(=O)(=O)c1ccc(Cl)cc1	3.1
1924	Cc1nc(CS(=O)(=O)c2ccccc2)cc(N2CCOCC2)n1	1.07
1925	Cc1ccc(S(=O)(=O)N2N=Cc3ccccc3B2O)cc1	0.05
1926	S=C(NC1CCCCC1)N1CCC(c2cnc[nH]2)CC1	2.3
1927	COc1ccc(-c2cc3c(N[C@H]4CCCNC4)ncc(C(N)=O)c3s2)cc1	1.82
1928	C[N+]1(C)[C@H]2C[C@H](OC(=O)C(O)(c3cccs3)c3cccs3)C[C@@H]1[C@H]1O[C@@H]21	-0.25
1929	N=C(N)c1cc2c(-c3ccccc3)cccc2s1	1.27
1930	O=C1C(=O)N(Cc2ccc(Cl)cc2)c2ccccc21	3.1
1931	COc1ccccc1O[C@@H](c1ccccc1)[C@@H]1CNCCO1	0.9
1932	CCCNC(=O)c1nnc2c(-c3ncccn3)cccc2c1N	1.86
1933	O=c1[nH]c2c(O)ccc([C@@H](O)CNCCc3ccc(CNCCc4c(Cl)cccc4Cl)cc3)c2s1	2.3
1934	CC1CN(S(=O)(=O)c2ccccc2)CCN1Cc1cc(Cl)ccc1OCC(=O)O	0.69
1935	O=C(COCc1ccncc1)N1CCC(c2ccc(Cl)cc2)CC1	2.74
1936	CC(O)(C(=O)Nc1ccc(S(=O)(=O)c2ccncc2)cc1)C(F)(F)F	2.15
1937	Cc1ccc(CO)cc1N(C)c1ccnc(Nc2cc(N3CCOCC3)nc(N3CCOCC3)c2)n1	3.44
1938	O=C(N[C@H]1CN2CCC1CC2)c1ccc(Cl)cc1	0.6
1939	O=C(Cc1ccccn1)c1ccc(Cl)cc1	2.96
1940	COc1nc(Br)cnc1NS(=O)(=O)c1cccc2c(N(C)C)cccc12	1.9
1941	COc1ccccc1OCC(O)COC(N)=O	0.36
1942	O=c1[nH]c(-c2ccccc2)nc2cc(Cl)ccc12	3.31
1943	CCC(Oc1ccc(C(F)(F)F)cc1-c1ccc(S(=O)(=O)CC)cc1C)C(=O)O	0.31
1944	COC(=O)N1CCN(C(=O)Cc2ccc(Cl)c(Cl)c2)[C@@H](CN2CCCC2)C1	1.97
1945	Cc1ncc(-c2ccnc(Nc3ccc(S(=O)(=O)CCCN(C)C)cc3)n2)n1C(C)C	1.32
1946	CC1(C)CCC(NC(=O)[C@@H](N)CCC(=O)O)CC1	-0.27
1947	NS(=O)(=O)c1cc2c(cc1Cl)NC(C1CC3C=CC1C3)NS2(=O)=O	2.12
1948	Oc1ccc(Br)c2ccccc12	4.3
1949	CNC(=O)c1ccc(N2C(=S)N(c3ccc(C#N)c(C(F)(F)F)c3)C(=O)C23CCC3)cc1F	3.3
1950	CN[C@@H](C)C(=O)N[C@H](C(=O)N[C@H]1CCCN(CCc2cccc(F)c2)C1)C1CCCCC1	2.64
1951	CCCc1cc(OCc2ccccc2)cc(=O)n1Cc1ccc(-c2ccccc2-c2nn[nH]n2)cc1	2.4
1952	N#CC1(NC(=O)[C@@H]2CCCC[C@H]2C(=O)N2CCN(c3nccs3)CC2)CC1	1.3
1953	COc1ccc(CN2C(=O)CCC2(C)C(=O)NC2CCCCC2)c(OC)c1	2.38
1954	CN(C)CC(O)COc1ccc(Nc2nccc(Nc3cc(Cl)ccc3Cl)n2)cc1	2.9
1955	CN(C)CCCNC(=O)c1nc(Cl)c(N)nc1N	-1
1956	Cc1ccc(/C(=C\CN2CCCC2)c2ccccn2)cc1	1.88
1957	COc1cc(N2CCN(C(C)=O)CC2)ccc1Nc1ncc(C#N)c(-c2cnc3ccccn23)n1	2.8
1958	CN(C)C(=O)N[C@H]1CC[C@H](CCN2CCN(c3ccc(Cl)c(Cl)c3)CC2)CC1	3.15
1959	Oc1c2ncc3ccccc3c2nn1-c1ccccc1	0.8
1960	Cc1c(Sc2ccc(Cl)cc2)c2c(-c3cnccn3)cccc2n1CC(=O)O	0.03
1961	COc1ncc(C)cc1-c1cccc2c(N)c(C(=O)NC3CC3)nnc12	3.4
1962	O=C(O)COc1ccc(Cl)cc1CN1CCCN(S(=O)(=O)c2ccccc2)CC1	1.01
1963	O=c1[nH]c2c(O)ccc([C@@H](O)CNCCc3cccc(CNCCc4c(Cl)cccc4Cl)c3)c2s1	3.15
1964	CCN(CC)CCNC(=O)c1c(C)[nH]c(/C=C2\C(=O)Nc3ccc(F)cc32)c1C	2.26
1965	O=C1NC(=O)C(c2cnc3ccccn23)=C1c1cn2c3c(cccc13)CN(C(=O)N1CCOCC1)CC2	1.79
1966	CN1CCN(C(=O)c2cc3cc(F)ccc3[nH]2)CC1	1.97
1967	O=C(/C=C/Sc1nc[nH]n1)c1ccc(Cl)cc1	3.1
1968	O=C1C2CCC(N2)C(=O)N1Cc1ccccc1	2.21
1969	Cn1nnc2c(C(N)=O)ncn2c1=O	-1.08
1970	Fc1cc2[nH]cnc2cc1Cl	2.35
1971	CC(=O)Nc1ccc(CNc2[nH]nc3cccc(Oc4ccc(F)cc4)c23)cc1	4.28
1972	N[C@H](CNC(=O)c1cc2c(-c3ccccc3Cc3ccccc3)cccc2[nH]1)C(=O)O	3.25
1973	CCN(CC)C(=O)Cc1csc(NS(=O)(=O)c2cccc(Cl)c2C)n1	1.67
1974	CCCN(CCO)CCCOc1ccc2c(Nc3cc(CC(=O)Nc4cccc(F)c4F)[nH]n3)ncnc2c1	2.19
1975	CCCc1c(C(=O)Nc2cc(C)on2)cnn1-c1ccccc1	3.7
1976	O=C(CC1CCCCCC1)Nc1cccc2c(=O)n([C@H]3CCNC3)ccc12	1.15
1977	O=C(O)c1cc(N=Nc2ccc(S(=O)(=O)Nc3ccccn3)cc2)ccc1O	-0.58
1978	Cc1ccc(-c2ncc(CN3CCOCC3)s2)cc1NC(=O)c1ccc(OCc2ccccn2)cc1	3.1
1979	Cc1oc(-c2ccccc2)cc1C(=O)Nc1cccc(C(=O)O)c1	1.63
1980	CCN(CC)C(=O)c1ccc(C(=C2CCN(Cc3ccc(F)cc3)CC2)c2cccc3cccnc23)cc1	3.86
1981	CCN(CC)S(=O)(=O)c1ccc(NC(=O)C(C)(O)C(F)(F)F)cc1	2.63
1982	CC(CO)(CO)Nc1nc(SCc2cccc(F)c2F)nc2nc(N)sc12	2.87
1983	Cc1nc(C(=O)[C@@H](C)Oc2ccc(SCCCCCc3ccccc3)cc2)sc1CCCC(=O)O	3.58
1984	COC(=O)COc1ccc(OCCNCC(O)COc2ccccc2)cc1	1.54
1985	Oc1cccc(O[C@@H]2C[C@@H]3CC[C@H](C2)N3Cc2ccccc2)c1	2.3
1986	O=c1[nH]n(C(c2ccccn2)C2CC2)c(=O)c2c(O)c3ccc(Cl)cc3nc12	1
1987	COc1ccc(-c2nc3c(NCCCNC(C)=O)c(Br)cnc3[nH]2)cc1	3.28
1988	COc1ccc(N(C(=O)c2ccccc2)C(C(=O)NC2CCCC2)c2ccccc2F)c(OC)c1	3.86
1989	Cc1ccnc(NCc2ccc(Cl)cc2)c1	3.6
1990	CCN(c1ccnc(Nc2cc(N3CCOCC3)cc(N3CCOCC3)c2)n1)c1cc(CO)ccc1C	3.8
1991	CCCc1c(OCc2ccc(-c3nn[nH]n3)cc2OC)ccc(C(C)=O)c1O	2.8
1992	Nc1nc(N)c(-c2ccc(NC(=O)C3CC3)cc2)c(COCc2ccccc2)n1	2.46
1993	O=C(c1ccc(C(=C2CCN(Cc3cscn3)CC2)c2cccc3cccnc23)cc1)N1CCOCC1	2.12
1994	O=C(NS(=O)(=O)Cc1ccccc1)N1CCC(N2CCC(Oc3ccc(Cl)c(Cl)c3)CC2)CC1	2.13
1995	Cc1cc(Nc2nc(O[C@H](C)c3ccc(F)cn3)c(C#N)nc2C)n[nH]1	2.72
1996	O=C(NCc1ccncc1)c1ccc(Oc2ccc(C#C[C@]3(O)CN4CCC3CC4)cc2)cc1	2.42
1997	COc1cc(Nc2cc(Oc3cc(C)c(C)nc3-c3ccccn3)ccn2)cc(OC)c1OC	3.22
1998	COc1cccc(CNc2nc(NC(C)C)nc3ccsc23)c1OC	3.7
[truncated: 2,094 more rows]

## Sheet: Table S2
Table S2. Rat oral LD50 dataset including canonical SMILES for model development.
Index No.	Canonical SMILES	lnLD50 (ln mg/kg)
1	CC1C(=O)CC2(C(C)C)CC12	5.2575
2	N#Cc1nc2c(o1)NCC(c1ccccc1)C2	7.824
3	CC1=C(C)C(=O)C(C(CCCCCC(=O)O)c2ccccc2)=C(C)C1=O	8.2295
4	CNC(C)CC1CCCCC1	4.4188
5	CCCCOC(=O)CC(O)C(=O)OCCCC	9.1798
6	CCCc1c(Cc2ccc(-c3ccccc3C(N)=O)cc2)c(O)nc2nncn12	5.7038
7	O=C(Nc1cc(Cl)c(Cl)cc1Cl)c1cc(Cl)cc(-c2ccccc2)c1O	8.7499
8	O=C(Nc1cc(Cl)ccc1Cl)c1cc(Cl)cc(-c2ccccc2)c1O	8.7499
9	CCN(CC)Cc1cc(-c2ccccc2)ccc1O	3.3322
10	CN(C)Cc1cc(-c2ccccc2)ccc1O	3.2189
11	Oc1ccc(-c2ccccc2)cc1CN1CCCCC1	3.4012
12	Oc1ccc(-c2ccccc2)cc1CN1CCOCC1	3.2189
13	CCCc1c(Cc2ccc(-c3ccccc3-c3nn[nH]n3)cc2)c(O)nc2nc(N(CC)CC)nn12	5.7038
14	CCCc1c(Cc2ccc(-c3ccccc3-c3nn[nH]n3)cc2)c(O)nc2nc(CO)nn12	5.7038
15	CCCc1c(Cc2ccc(-c3ccccc3-c3nn[nH]n3)cc2)c(O)nc2nc(SC)nn12	5.7038
16	CCCc1c(Cc2ccc(-c3ccccc3-c3nn[nH]n3)cc2)c(O)nc2nc(N)nn12	5.7038
17	CCCc1c(Cc2ccc(-c3ccccc3-c3nn[nH]n3)cc2)c(O)nc2nc(CC)nn12	5.7038
18	CCCc1c(Cc2ccc(-c3ccccc3-c3nn[nH]n3)cc2)c(O)nc2nc(C)nn12	5.7038
19	CCCc1c(Cc2ccc(-c3sccc3-c3nn[nH]n3)cc2)c(O)nc2nc(C)nn12	5.7038
20	CCCc1c(Cc2ccc(-c3oc(Br)cc3-c3nn[nH]n3)cc2)c(O)nc2ncnn12	5.7038
21	Oc1nc2ncnn2c(COCc2ccccc2)c1Cc1ccc(-c2ccccc2-c2nn[nH]n2)cc1	5.7038
22	OCc1c(Cc2ccc(-c3ccccc3-c3nn[nH]n3)cc2)c(O)nc2ncnn12	5.7038
23	COCc1c(Cc2ccc(-c3ccccc3-c3nn[nH]n3)cc2)c(O)nc2ncnn12	5.7038
24	CCCCc1c(Cc2ccc(-c3ccccc3-c3nn[nH]n3)cc2)c(O)nc2nc(C)nn12	5.7038
25	CCCCc1c(Cc2ccc(-c3ccccc3-c3nn[nH]n3)cc2)c(O)nc2ncnn12	5.7038
26	CCc1c(Cc2ccc(-c3ccccc3-c3nn[nH]n3)cc2)c(O)nc2ncnn12	5.7038
27	Cc1c(Cc2ccc(-c3ccccc3-c3nn[nH]n3)cc2)c(O)nc2ncnn12	5.7038
28	CCCc1c(Cc2ccc(-c3ccccc3-c3nn[nH]n3)cc2)c(O)nc2ncnn12	5.7038
29	CCCc1c(Cc2ccc(-c3ncccc3-c3nn[nH]n3)cc2)c(O)nc2ncnn12	5.7038
30	CCCc1c(Cc2ccc(-c3sccc3-c3nn[nH]n3)cc2)c(O)nc2ncnn12	5.7038
31	CCCc1c(Cc2ccc(-c3ccccc3-c3nn[nH]n3)cc2)c(N)nc2ncnn12	5.7038
32	CCCc1c(Cc2ccc(-c3ccccc3-c3nn[nH]n3)cc2)c(NCCN2CCOCC2)nc2ncnn12	5.7038
33	CCCc1c(Cc2ccc(-c3ccccc3-c3nn[nH]n3)cc2)c(N(CC)CC)nc2ncnn12	5.7038
34	CCCc1nc2ncnn2c(N(CC)CC)c1Cc1ccc(-c2ccccc2-c2nn[nH]n2)cc1	5.7038
35	CCCc1c(Cc2ccc(-c3ccccc3-c3nn[nH]n3)cc2)c(N2CCCCC2)nc2ncnn12	5.7038
36	CCCc1c(Cc2ccc(-c3ccccc3-c3nn[nH]n3)cc2)c(OCCOC)nc2ncnn12	5.7038
37	Cc1nc2ncnn2c(C)c1Cc1ccc(-c2ccccc2-c2nn[nH]n2)cc1	5.7038
38	CCCc1nc2ncnn2c(CCC)c1Cc1ccc(-c2ccccc2-c2nn[nH]n2)cc1	5.7038
39	CCCc1c(Cc2ccc(-c3ccccc3-c3nn[nH]n3)cc2)c(N=[N+]=[N-])nc2ncnn12	5.7038
40	CCCc1c(Cc2ccc(-c3ccccc3-c3nn[nH]n3)cc2)c(N2CCCC2)nc2ncnn12	5.7038
41	CCCc1c(Cc2ccc(-c3ccccc3-c3nn[nH]n3)cc2)cnc2ncnn12	5.7038
42	CCCc1c(Cc2ccc(-c3ccccc3-c3nn[nH]n3)cc2)c(S)nc2ncnn12	5.7038
43	CCCc1c(Cc2ccc(-c3ccccc3-c3nn[nH]n3)cc2)c(=O)nc2[nH][nH]c(=O)n12	5.7038
44	CCCCCCCCC=CCCCCCCCCCCCC(=O)O	9.8747
45	O=C(c1ccccc1)C1(O)CCCCC1	7.824
46	CC1(C)C2C(=O)OC(O)C21	5.9915
47	CC1CC(O)CC(C)(C)C1	7.7832
48	N#CC(=O)c1cccc(Cl)c1Cl	3.912
49	O=C(c1ccc(OC2CCOC2)cc1)c1cc(I)ccc1Cl	5.7038
50	N#CC(C#N)=Cc1ccccc1Cl	5.1818
51	CCCC=CC=O	6.6593
52	CC(C)=CCCC(C)=CCOC=O	8.6995
53	CC(C)=CCCC(C)=CC=O	6.2146
54	O=[N+]([O-])C=C1SCCN1Cc1ccccc1	6.9078
55	CC=CC=CC=O	5.7038
56	COCCc1ccccc1	8.3187
57	CC1=CC(=C2C(=O)c3ccccc3C2=O)C=CN1CCN1CCCCC1	5.9661
58	CC(Cc1ccc(C(C)(C)C)cc1)CN1CC(C)OC(C)C1	8.1719
59	CCC=CC#N	5.717
60	CC(C)=CCCC(C)=CCO	8.4118
61	CC(=O)OCC#N	3.4657
62	FC(Cl)(Cl)c1ccccc1	6.1092
63	ClC=CCl	7.1188
64	BrCC=CCBr	4.1271
65	CCCC=CCO	8.1605
66	CC=Cc1ccc(OC)cc1	7.6449
67	CC=CC(=O)C1=C(C)CCCC1(C)C	7.9793
68	CCN(Cc1ccc(Cl)nc1)C(=C[N+](=O)[O-])NC	7.362
69	NC(=O)NCCO	8.1528
70	Cc1cc(Cl)ccc1OC(C)C(=O)O	6.9565
71	CC(O)C(=O)O	8.5043
72	CC(=CC(C)CC(C)CC(C)C)C1CC(=O)OC1=O	7.8438
73	CCC=CCCO	8.4553
74	CCCCCCCCC=CCCCCCCCC#N	9.2103
75	CCCCCCCCC=CCCCCCCCCCCCCC	10.0463
76	CC=Cc1ccc(OC)cc1	5.0106
77	ClC=CCCl	4.5326
78	FC(F)=C(F)c1ccccc1	7.824
79	ClC=C(Cl)c1ccccc1	8.294
80	N#CCON=C(C#N)c1ccccc1	7.7306
81	CCN(CCC(=O)OC)c1ccccc1	7.8038
82	CC1(C)C2CCC1(C)C(O)C2	8.6656
83	CCCCCCCOc1ccc(-c2ccc(C#N)cc2)cc1	9.2103
84	CCCCCCOc1ccc(-c2ccc(C#N)cc2)cc1	9.2103
85	CCCCCCCCOc1ccc(-c2ccc(C#N)cc2)cc1	9.2103
86	CCCCOc1ccc(-c2ccc(C#N)cc2)cc1	9.2103
87	COc1ccc(-c2ccc(C#N)cc2)cc1	9.2103
88	CCCCCCCCc1ccc(-c2ccc(C#N)cc2)cc1	7.6962
89	O=Cc1ccc(-c2ccccc2)cc1	6.9078
90	Nc1cc(-c2ccccc2)ccc1O	7.724
91	COc1cc(OC)n2nc(N)nc2n1	6.9373
92	C=COCCOCCOC=C	8.2242
93	CC1(C)C(C=C(Cl)C(F)(F)F)C1C(=O)OC(C#N)c1cccc(Oc2ccccc2)c1	4.0254
94	CC(OC(=O)ON1C(=O)CCC1=O)OC(=O)C(C)C	5.7038
95	NC(=S)Nc1cccc2ccccc12	1.0986
96	NCCN1CCNCC1	7.6686
97	O=C1C=CC(=O)N1c1ccccc1Cl	6.2538
98	C[NH+](C)Cc1ccccc1Cl	5.7038
99	O=NN(CCF)C(=O)NC1CCCCC1	2.9178
100	O=c1[nH]ncc2ccccc12	5.9135
101	O=C(O)Cn1c(=O)n(Cc2ccc(Br)cc2F)c(=O)c2ccc(F)cc21	7.6704
102	CCOC(=O)N1CC=Cc2ccccc21	5.273
103	NC(=O)c1cn(CCO)nc1[N+](=O)[O-]	8.2025
104	O=C1CCCN1CCO	9.5771
105	C=C(C)c1cccc(C(C)(C)N=C=O)c1	8.0392
106	CNC(=O)c1cc(OC)n(-c2cccc(Cl)c2)n1	7.3395
107	CCCCC1OC(=O)c2ccccc21	7.8038
108	CCCC=C1OC(=O)c2ccccc21	7.5229
109	O=C1OCc2c(Cl)cccc21	6.9078
110	Cc1cccc(N=NN(C)C)c1	5.7038
111	CN(C)N=Nc1ccc(C(=O)O)cc1	5.7683
112	CC(C)(C)C(=O)COc1ccc(Cl)cc1	8.4446
113	CC(C)(C)C(=O)CCc1ccc(Cl)cc1	8.0536
114	CCOc1ccc(N2C(=O)C=CC2=O)cc1	6.4457
115	NC1=C2C(=O)C(Br)=CC(N)=C2C(=O)C(Br)=C1	7.7832
116	CNN=Nc1ccc([N+](=O)[O-])cc1	6.148
117	COc1ccc(C(=O)CC(=O)c2ccc(C(C)(C)C)cc2)cc1	9.6803
118	BrCc1cccc(Oc2ccccc2)c1	7.7519
119	CCCCNC1(P(=O)(OCCCC)OCCCC)CCCCC1	8.0064
120	C=C(OP(=O)(OC)OC)P(=O)(OC)OC	5.6595
121	CNc1ccc(NCCO)c2c1C(=O)c1ccccc1C2=O	7.2041
122	O=NN(c1cccc(C(F)(F)F)c1)c1ccccc1C(=O)O	6.8024
123	NC(=S)Nc1ccccc1Cl	1.5261
124	Cc1ccccc1NC(=N)NC(=N)N	6.6846
125	CC(C)C1=CCC(CCOC=O)=CC1	8.1798
126	CCCC(O)CO	9.4494
127	CC1CN1C(=O)c1cccc(C(=O)N2CC2C)c1	7.1148
128	ClCC(Cl)C(Cl)(Cl)Cl	5.7038
129	FC(F)(Cl)C(Cl)(Cl)Cl	10.1266
130	ClCC(Cl)(Cl)Cl	6.5073
131	CC(Cl)(Cl)CC(Cl)(Cl)Cl	6.2146
132	O=C(C(Cl)Cl)C(Cl)(Cl)Cl	5.2983
133	COC(F)(F)C(C(F)(F)F)C(F)(F)F	3.912
134	ClCCC(Cl)(Cl)Cl	6.1944
135	CC(Cl)(Cl)Cl	9.2399
136	CCC(Cl)(Cl)Cl	8.9173
137	ClCC(Cl)(Cl)C(Cl)Cl	6.7081
138	BrC(Br)C(Br)Br	7.0901
139	ClC(Cl)C(Cl)Cl	6.6846
140	CC(C)OC(Cl)=C(Cl)C(Cl)=C(Cl)Cl	7.0984
141	FC(F)(Cl)C(F)(Cl)Cl	10.669
142	ClCC(Cl)Cl	6.7298
143	CC(Cl)C(Cl)Cl	7.1148
144	CCCCN(CCCC)C(=O)N(CCCC)CCCC	9.741
145	CCOC(CC(OCC)OCC)OCC	7.384
146	CCOCCC(OCC)OCC	7.3778
147	CNC(=S)N(C)C	5.7557
148	ClCCOCCC(OCCCl)OCCCl	6.5653
149	C=CC(C)CCCC(C)(C)O	8.1887
150	c1ccc(-c2cccc(-c3ccccc3)c2)cc1	7.7832
151	c1ccc(-c2ccc(-c3ccccc3)cc2)cc1	9.2103
152	CCCCCCCCc1ccc(-c2ccccc2)cc1	7.7832
153	CC1CC(C)(C)CC(OOC(C)(C)C)(OOC(C)(C)C)C1	9.4664
154	CC(Cl)(Cl)[N+](=O)[O-]	6.0162
155	CC(Cl)Cl	9.5539
156	C=C(Cl)Cl	7.4955
157	CCC(Cl)Cl	8.7796
158	COC(C)OC	8.7796
159	CC(=O)OC(C)(C)CCc1ccccc1	8.4867
160	CN(C)N	4.804
161	CCC(C)(C)OO	6.7616
162	O=C=NC1CCC(CC2CCC(N=C=O)CC2)CC1	9.2003
163	CC(O)COCC(C)O	9.6058
164	ClCC(Cl)(Cl)CCl	8.7483
165	ClC1C(Cl)C(Cl)C(Cl)C(Cl)C1Cl	4.6052
166	Clc1cc2c(c(Cl)c1Cl)Oc1c(Cl)c(Cl)c(Cl)c(Cl)c1O2	1.8405
167	Clc1cc2c(cc1Cl)Oc1c(Cl)c(Cl)c(Cl)c(Cl)c1O2	-0.1054
168	O=C(O)CC(C(=O)O)C(CC(=O)O)C(=O)O	7.4501
169	Clc1ccc(Cl)c(Cl)c1Cl	7.293
170	Clc1c(Cl)c(Cl)c2c(c1Cl)Oc1ccccc1O2	-0.2231
171	c1ccc2c3c([nH]c2c1)CCCC3	7.8823
172	OC1CCCc2ccccc21	7.3902
173	Cc1ccc(C)c(C)c1C	8.7653
174	Clc1cc(Cl)c(Cl)c(Cl)c1	7.4541
175	Cc1cc(C)c(C)c(C)c1	8.5481
176	Clc1cc2c(c(Cl)c1Cl)Oc1cc(Cl)c(Cl)c(Cl)c1O2	0.5878
177	Clc1cc2c(c(Cl)c1Cl)Oc1c(cc(Cl)c(Cl)c1Cl)O2	0.5878
178	Clc1cc2c(cc1Cl)Oc1c(cc(Cl)c(Cl)c1Cl)O2	-1.6094
179	O=c1[nH]nnc2ccccc12	6.3886
180	c1ccc2[nH]nnc2c1	6.2146
181	O=[N+]([O-])OCC(CO)O[N+](=O)[O-]	7.2605
182	CCN(CC)C(=O)c1nnn(-c2ccccc2)c1C	6.2146
183	Cc1c(C(=O)N(C)C)nnn1-c1ccccc1	6.2146
184	Clc1cccc(Cl)c1Cl	6.628
185	ClCC(Cl)CCl	6.2246
186	ClC=C(Cl)CCl	6.4232
187	Clc1cc(Cl)c(Cl)cc1Cl	7.3132
188	Cc1cc(C)c(C)cc1C	8.8521
189	CC1CC(C)C(C)CC1C	9.6408
190	C=CC(=O)OCCOC(=O)c1ccc(C(=O)O)cc1C(=O)O	8.0678
191	N=c1[nH]c(=S)ss1	8.0229
192	Nc1nnc(-c2cc(Cl)ccc2Cl)c(N)n1	6.4615
193	Clc1ccc(Cl)c(Cl)c1	6.8352
194	Cc1ccc(C)c(C)c1	8.6995
195	BrC1CCC(Br)C(Br)CCC(Br)C(Br)CCC1Br	9.2103
196	OCCCCC(O)CO	9.6486
197	OC(C1CO1)C(O)C1CO1	2.6391
198	N#Cc1ccccc1C#N	3.4012
199	N#Cc1cccc([N+](=O)[O-])c1C#N	7.2542
200	N#Cc1ccc(F)cc1C#N	2.6391
201	N#Cc1ccc([N+](=O)[O-])cc1C#N	6.7452
202	O=c1[nH]sc2ccccc12	6.9276
203	Oc1noc2ccccc12	7.8823
204	ClCCOCCOCCCl	5.5215
205	ClCc1ccccc1CCl	7.7244
206	CC(C)c1ccc2ccccc2c1C(C)C	9.6277
207	O=C1c2c(Br)c(Br)c(Br)c(Br)c2C(=O)N1CCN1C(=O)c2c(Br)c(Br)c(Br)c(Br)c2C1=O	8.9227
208	CCC(O)CO	9.6803
209	NC1CCCCC1N	8.4242
210	CC(N)CN	7.7098
211	N#CCCC(Br)(C#N)CBr	6.2442
212	ClCC(Br)CBr	5.1358
213	BrCC(Br)C1CCC(Br)C(Br)C1	8.0771
214	BrCCBr	4.6821
215	BrC=CBr	4.7622
216	Clc1ccc(C(Cl)(Cl)Cl)cc1Cl	7.3778
217	FC(F)(F)c1ccc(Cl)c(Cl)c1	7.0475
218	Clc1ccccc1Cl	6.2146
219	ClCCCl	6.7912
220	CC(Cl)CCl	7.574
221	CCOc1ccccc1OCC	8.8888
222	COc1cc2c(cc1OC)C1C(=O)c3ccc4c(c3OC1CO2)CC(C(C)C)O4	7.824
223	COc1ccccc1OC	6.7912
224	Cc1cccc([N+](=O)[O-])c1C	7.6544
225	CNNC	4.6052
226	ClC(Cl)(Cl)CC1CO1	7.3132
227	CCC1CO1	7.0648
228	NCCNCCNCCN	5.5053
229	CN(C)CCN	7.0344
230	CC(=O)OCCOC(C)=O	8.832
231	O=COCCOC=O	7.3199
232	CC(=O)OCCO	9.018
233	O=S1(=O)CCCCO1	6.2146
234	Nc1ccccc1N	6.2344
235	NCC(O)CO	8.9227
236	CC(COC(=O)c1ccccc1)OC(=O)c1ccccc1	7.8865
237	CC(O)CO	9.9988
238	CC1CO1	5.9402
239	CC1(C)COS(=O)(=O)OC1	2.3026
240	O=S1OCC(CCl)O1	3.4012
241	COC(F)=C(C(F)(F)F)C(F)(F)F	6.9754
242	c1ccc(-c2nnco2)cc1	6.0868
243	Ic1ccc(Nc2nnc(CCN3c4ccccc4Sc4ccccc43)s2)cc1	8.0392
244	CS(=O)(=O)c1nnc(C(F)(F)F)s1	5.7427
245	C1CN1P1(N2CC2)=NP(N2CC2)(N2CC2)=NP(N2CC2)(N2CC2)=N1	4.585
246	C1=CC=CCC=C1	4.0431
247	C=CC=CC=C	5.3471
248	CCN1CN(CO)C(=O)N(CO)C1	9.0143
249	CNc1nc(C)nc(OC)n1	5.9764
250	CCSc1nc(=O)n(CC(C)(C)C)c(=O)n1N	8.1605
251	Nc1nc(COc2ccc(Cl)cc2)nc(NCCc2ccccc2)n1	8.294
252	Clc1cc(Cl)cc(Cl)c1	6.6846
253	CCN1CN(CC)CN(CC)C1	5.7557
254	Oc1cc(O)cc(O)c1	8.294
255	O=[N+]([O-])c1cc([N+](=O)[O-])cc([N+](=O)[O-])c1	5.5215
256	C=CC=CC=CCCCCC	8.931
257	Nc1cc2c(S(=O)(=O)O)cc(S(=O)(=O)O)cc2cc1S(=O)(=O)O	9.4727
258	Nc1cc(N)cc(C(F)(F)F)c1	5.9402
259	Nc1cccc(N)c1	5.6348
260	Nc1ccc(OC(F)(F)C(F)F)c(N)c1	6.9754
261	N#Cc1cccc(C#N)c1	6.7569
262	O=C(Cl)c1cccc(C(=O)Cl)c1	7.6962
263	O=C(O)c1cccc(C(=O)O)c1	9.2496
264	COC(=O)c1cc(Oc2ccc(C(=O)OC)cc2N)cc(C(=O)OC)c1	9.2103
265	NCc1cccc(CN)c1	5.2983
266	Cc1cc(O)cc(O)c1	6.7382
267	CNC(=O)Oc1ccc(C)c2c1OC(C)(C)O2	2.1972
268	CCC1(CC)Oc2cccc(OC(=O)NC)c2O1	3.8286
269	CNC(=O)Oc1cccc2c1OCO2	4.5433
270	c1ccc2c(c1)OCO2	6.363
271	CCOC(=S)c1ccc2c(c1)OCO2	7.0562
272	Cc1ccccc1NC(=N)Nc1ccccc1C	5.4293
273	O=C=NCc1cccc(CN=C=O)c1	8.5849
274	C=CC=C	8.6089
275	C=C(Cl)C(Cl)=C(Cl)Cl	6.0426
276	CC(O)CCO	10.0345
277	NC1CCCC(N)C1	5.9661
278	NCC1CCCC(CN)C1	5.7038
279	Cc1ccc(C2CC(=O)C(C(=O)CCc3ccc4c(c3)OCO4)C(=O)C2)cc1	8.294
280	O=C(CCc1ccc2c(c1)OCO2)C1C(=O)CC(c2ccccc2)CC1=O	8.294
281	CCSC(C)CC1CC(=O)C(C(=O)CC)C(=O)C1	5.1358
282	C1=CCC=C1	4.7274
283	CC1(C)C(=O)N(Br)C(=O)N1Br	5.5215
284	OC(CCl)CCl	4.7005
285	CC1(C)C(=O)N(Cl)C(=O)N1Cl	6.2953
286	Clc1cccc(Cl)c1	7.0901
287	O=C(CCl)CCl	2.9957
288	ClC=CCCl	6.1527
289	CN1C(=CC=O)C(C)(C)c2ccccc21	5.3706
290	Cc1cccc2[nH]c(=S)[nH]c12	5.8289
291	CC(C)c1cccc(C(C)C)c1	8.9092
292	Cc1ccc([N+](=O)[O-])c(C)c1	7.4325
293	Cc1cccc(C)c1	7.7549
294	CC(=O)OC(C)CC(C)C	8.7258
295	CC1(C)C(=O)N(CO)C(=O)N1CO	8.2215
296	O=[N+]([O-])c1cccc([N+](=O)[O-])c1	4.8203
297	O=C(O)c1ccc2c3c(ccc(C(=O)O)c13)C(=O)OC2=O	8.1628
298	O=c1occo1	5.7038
299	O=C1OCCO1	9.2103
300	O=C1OCC(CCl)O1	4.382
301	C1COCO1	8.5564
302	c1ccc(CC2OCCO2)cc1	7.6962
303	C=CC1OCCO1	4.4391
304	CC1(C)OCC(CCl)O1	4.7449
305	C1OCC(COCC2COCO2)O1	8.5464
306	CC1COC(c2ccccc2)O1	8.0064
307	OCC1COC(Cn2cncn2)(c2cc3ccccc3o2)O1	6.9078
308	OC(COc1ccccc1)COc1ccccc1	7.2793
309	N=C(Nc1ccccc1)Nc1ccccc1	4.7095
310	CNC(=O)ON=C1SCCS1	1.0986
311	CN(SSC(C)(C)C)C(=O)ON=C1SCCS1	1.7228
312	CC(C)N1C=CC(=C2C(=O)c3ccccc3C2=O)C=C1	7.2793
313	COCCN1C=CC(=C2C(=O)c3ccccc3C2=O)C=C1	5.8579
314	CCN1C=CC(=C2C(=O)c3ccccc3C2=O)C=C1	5.7991
315	CCCCCCC(O)CCO	9.9035
316	CNC(=O)ON=C1SC(C)OC1C	1.5041
317	CNC(=O)ON=C1SCOC1C(C)C	2.7726
318	CNC(=O)ON=C1SCOC1(C)C	0.6931
319	CNC(=O)ON=C1SCOC1C	2.4849
320	CCCC1OCSC1=NOC(=O)NC	4.4188
321	CNC(=O)ON=C1COCS1	3.8918
322	O=S1(=O)CCCO1	4.6052
323	CCCCCCCCCCCCN(CCCN)CCCN	5.4955
324	CCCCCCCCC=CCCCCCCCCNCCCN	6.9078
325	NCCCNCCNCCCN	7.0901
326	CCCCN(CCCC)CCCN	6.7093
327	CCN(CC)CCCN	6.3099
328	CC(C)CCCCCCCOCCCNCCCN	3.912
329	OCCCO	9.6158
330	CC(C)(COC(N)=O)COC(N)=O	7.8272
331	CC(N)(CO)CO	9.741
332	CCCCC(CC)(COC(N)=O)COC(N)=O	6.4953
333	O=C(O)c1ccc(C(=O)O)c2c(C(=O)O)ccc(C(=O)O)c12	8.9227
334	C1COCCOCCOCCOCCO1	7.2513
335	CCCCCCCCCCCC(=O)OCC(O)C1OCC(O)C1O	10.3609
336	CCCCCCCCCCCCCCCC(=O)OCC(O)C1OCC(O)C1O	9.6741
337	Nc1ccc(N)cc1	4.382
338	Nc1cc(Cl)c(N)cc1Cl	7.4674
339	COc1cc(N)ccc1N	4.0943
340	Nc1ccc(N(c2ccccc2)c2ccc(N)cc2)cc1	5.7991
341	N#Cc1ccc(C#N)cc1	8.7641
342	O=C(Cl)c1ccc(C(=O)Cl)cc1	7.824
343	O=C1C=CC(=O)C=C1	1.7228
344	C=CC(=O)OCC(O)COCCCCOCC(O)COC(=O)C=C	5.2983
345	O=C=NCC1CCC(CN=C=O)CC1	7.3778
346	ClC(Cl)(Cl)c1ccc(C(Cl)(Cl)Cl)cc1	8.0709
347	OCCCCO	7.2079
348	C=CC(=O)OCCCCOC(=O)C=C	6.375
349	C(CCOCC1CO1)COCC1CO1	7.0335
350	CC(C)C12CCC(C)(CC1)O2	8.0392
351	O=C(O)C1CCC(C(=O)O)CC1	7.5512
352	NCC1CCC(CN)CC1	6.2729
353	OCC1CCC(CO)CC1	8.0709
354	Nc1ccc(N)c2c1C(=O)c1ccccc1C2=O	8.6639
355	ClCC=CCCl	4.4886
356	O=[N+]([O-])c1cc(Cl)ccc1Cl	7.0984
357	Clc1ccc(Cl)cc1	8.3316
358	CC(C)c1ccc(C(C)C)cc1	8.0709
359	Cc1ccc(C)c([N+](=O)[O-])c1	7.7998
360	CN1CCN(C)CC1	7.9084
361	C1COCCO1	8.3428
362	C1CSCCS1	7.9259
363	CC1=CC(=O)c2c(O)cccc2C1=O	4.1744
364	O=C1C=CC(=O)c2ccccc21	5.247
365	CNC(=O)ON=C1COCCS1	3.6109
366	C1CSCCO1	7.948
367	c1ccc(C2=C(c3ccccc3)SCCO2)cc1	8.0064
368	O=S1(=O)CS(=O)(=O)OCO1	5.7038
369	C1=CCCC=CCCC=CCC1	7.7407
370	O=C1c2cccc(S(=O)(=O)O)c2C(=O)c2cccc(S(=O)(=O)O)c21	7.7651
371	Nc1cccc2c(N)cccc12	6.452
372	Oc1c(Br)ccc2c(O)c(Br)ccc12	8.0709
373	O=S(=O)(O)c1cccc2c(S(=O)(=O)O)cccc12	10.309
374	Nc1cc2c(S(=O)(=O)O)cccc2c(S(=O)(=O)O)c1N	10.2751
375	Nc1cc(S(=O)(=O)O)c2cccc(S(=O)(=O)O)c2c1	9.3414
376	Nc1ccc(S(=O)(=O)O)c2cccc(S(=O)(=O)O)c12	10.9331
377	OCCCCCO	9.2103
378	CC1(C)CC(NCCCCCCNC2CC(C)(C)NC(C)(C)C2)CC(C)(C)N1	6.7799
379	ClCCCCCCCl	7.8917
380	N#CCCCCCCC#N	5.3706
381	O=C=NCCCCCCN=C=O	6.6039
382	C#CCCCC#C	7.7407
383	NCCCCCCN	6.6201
384	CCCCNCCCCCCN	6.2841
385	OCCCCCCO	8.0064
386	C=CCCCC=CCOC	8.5025
387	Oc1cccc2cc3cccc(O)c3c(O)c12	8.0759
388	O=C1c2cccc(S(=O)(=O)O)c2C(=O)c2c1cccc2S(=O)(=O)O	7.5337
389	CC12CCC(CC1)C(C)(C)O2	8.4553
390	C1CCC2=NCCCN2CC1	6.5236
391	O=C(O)c1cccc2c(Cl)ccc(C(=O)O)c12	8.1605
392	O=c1ccc2cccnc2n1-c1cccc(C(F)(F)F)c1	5.5452
393	Cc1cc2cccnc2n(-c2cccc(C(F)(F)F)c2)c1=O	5.5452
394	Cc1cc2cccnc2n(-c2ccccc2)c1=O	5.5452
395	NCCCCC(CN)CCCN	6.6333
396	O=C1NCCN1N=Cc1ccc([N+](=O)[O-])o1	7.4271
397	CC(O)CN(CCCN(C)C)CCCN(C)C	7.1944
398	C=CCCCCCCCCC(=O)O	7.824
399	CC12CC(O)C3C4CCC(=O)C=C4CCC3C1CCC2=O	5.7038
400	NCCCCCCCCCCC(=O)O	9.5956
401	O=C(O)C(F)(F)C(F)(F)C(F)(F)C(F)(F)C(F)(F)C(F)(F)C(F)(F)C(F)(F)C(F)(F)C(F)F	6.25
402	O=C1c2ccccc2C2=Nc3cccc4cccc(c34)N12	7.824
403	CC(C=CC1=C(C)CCCC1(C)C)=CC=CC(C)=CC(=O)O	8.294
404	C#CC1(O)CCC2C3CCc4cc(O)ccc4C3CCC21C	7.0901
405	CCC1CC2C3CCC4=CC(=O)CCC4C3CCC2(C)C1OC(C)=O	9.2103
406	CC12CCC(=O)C=C1CCC1C2CCC2(C)C1CCC2(C)O	7.824
407	C1COCCOCCOCCOCCOCCO1	6.2634
408	CC(=O)c1cccc2ccccc12	7.3524
409	CC(=O)NNC(=O)c1ccccn1	6.5117
410	CC(=O)NC(=N)S	3.912
411	CC(O)CN	8.357
412	NC1(C(=O)O)CCCC1	5.6699
413	Nc1ccc2ccc3cccc4ccc1c2c34	6.9754
414	CCCCCN(N=O)C(N)=O	6.3279
415	OCCN1CC1	4.3041
416	CC=Cc1ccc(OCc2ccccc2)c(OC)c1	8.497
417	CC(C)(C)OC(=O)N1CC(=O)C1	7.824
418	Fc1ccc(Br)c(F)c1	5.7038
419	CC1(C)C(=O)N(Cl)C(=O)N1Br	7.2371
420	ClCCCBr	7.0031
421	Fc1ccc(Br)cc1	7.901
422	CCCCBr	7.9233
423	CCCCCCCCCCBr	7.6024
424	CCCCCCCCCCCCBr	7.824
425	CCCCCCCCCCCCCCCCBr	7.824
426	CCC(C)(C)c1ccc(OCCCCN)c(C(C)(C)CC)c1	6.6846
427	CC(C)CCN(C)C	5.4161
428	CCCCNC	6.0403
429	CN(C)S(=O)(=O)CCCCNC(=O)N(CCCl)N=O	5.5215
430	CCCCS(=O)(=O)NC1CCCCC1	7.9431
431	CCCCS	7.3132
432	CCCCO	8.3802
433	CCC(N)CO	6.6846
434	CCOCCCCO	8.294
435	CCCC(=O)c1ccc2c(c1)N(CCCN(C)C)c1ccccc1S2	5.7038
436	CCCC(=O)c1ccc2c(c1)N(CCCN1CCOCC1)c1ccccc1S2	8.1605
437	CCCC(=O)c1ccc(N)cc1	4.4308
438	Cn1nnnc1SCCCC(=O)c1cccs1	6.2146
439	CCCCOCC(C)O	7.824
440	C=COCCOCCCC	8.0392
441	O=[N+]([O-])c1ccc(Cl)c([N+](=O)[O-])c1	6.9754
442	ClCCBr	4.1589
443	Cc1c(Cl)cccc1[N+](=O)[O-]	7.7493
444	Oc1ccc2ccccc2c1Cl	7.745
445	O=[N+]([O-])c1cc(C(F)(F)F)ccc1Cl	6.9801
446	O=[N+]([O-])c1ccccc1Cl	5.663
447	CC(CCl)[N+](=O)[O-]	5.2832
448	CC(O)CCl	4.6052
449	O=[N+]([O-])c1cccc(Cl)c1	6.0403
450	FC(F)(F)c1ccc(Cl)cc1	9.4727
451	O=[N+]([O-])c1ccc(Cl)cc1	6.3368
452	CCCCCl	7.8898
453	CCCCCCCl	8.8537
454	Clc1cccc2ccccc12	7.3395
455	CCCCCCCCCl	9.9035
456	CC(C)(C)C(=O)CCl	6.3099
457	CC(=O)CCl	4.6052
458	CC=CCl	7.5756
459	COC(=O)C1=C(C(=O)OC)CCCC1	6.5511
460	CC(O)C1CCCCC1	7.6497
461	O=C1CCCN1C1CCCCC1	5.9135
462	CCCCCCCCCCO	8.4596
463	CCCCCCCCC=COCC	7.824
464	CCCCCCCCCCC(C)CCCCCCCC	8.3187
465	CCCCCCCCCCCCCCCCCCCCCCO	9.2103
466	CCCCCCCCCCCCN	6.9276
467	CCCCCCCCCCCC[N+](C)(C)CC(=O)[O-]	4.2627
468	CCCCCCCCCCCCO	10.186
469	CCCCCCCCCCCCCCCCCCCCO	9.2103
470	C=COCC(CC)CCCC	7.2079
471	CCOCC(C)O	8.3894
472	CCOc1ccc([N+](=O)[O-])cc1	8.1017
473	CCCCOCC	7.5337
474	CCN1CCCc2ccccc21	7.4827
475	CCN(N=O)C(N)=O	5.7038
476	CCN1CCCC1=O	7.2079
477	O=c1[nH]nc2n1-c1cc([N+](=O)[O-])cc([N+](=O)[O-])c1OC2	8.2134
478	FC(F)(F)C(F)(F)C(F)(F)C(F)(F)C(F)(F)C(F)(F)CCI	8.2605
479	OCC(F)(F)C(F)(F)C(F)(F)C(F)(F)C(F)(F)C(F)(F)C(F)(F)C(F)F	8.3894
480	O=c1oc(=O)c2cc3c(=O)oc(=O)c3cc12	7.7187
481	O=C1OC(=O)c2cccc3cccc1c23	9.1695
482	c1ccc2oc(C3(Cn4cncn4)OCCO3)cc2c1	6.9078
483	CCOCC1COC(Cn2cncn2)(c2cc3ccccc3o2)O1	6.9078
484	COCC1COC(Cn2cncn2)(c2cc3ccccc3o2)O1	6.9078
485	c1ccc(OCC2COC(Cn3cncn3)(c3cc4ccccc4o3)O2)cc1	6.9078
486	CC1CC(C)(C)OC(Cn2cncn2)(c2cc3ccccc3o2)O1	6.9078
487	CCC1COC(Cn2cncn2)(c2cc3ccccc3o2)O1	6.9078
488	CC1COC(Cn2cncn2)(c2cc3ccccc3o2)O1	6.9078
489	CCC1(CC)COC(Cn2cncn2)(c2cc3ccccc3o2)OC1	6.9078
490	CC1(C)COC(Cn2cncn2)(c2cc3ccccc3o2)OC1	6.9078
491	CCCC1OC(Cn2cncn2)(c2cc3ccccc3o2)OCC1(C)C	6.9078
492	Clc1cc(Cl)c2oc(C3(Cn4cncn4)OCCCO3)cc2c1	6.9078
493	Clc1cc(Cl)c2oc(C3(Cn4cncn4)OCCO3)cc2c1	6.9078
494	CC(C)OCC1COC(Cn2cncn2)(c2cc3cc(Cl)cc(Cl)c3o2)O1	6.9078
495	CCOCC1COC(Cn2cncn2)(c2cc3cc(Cl)cc(Cl)c3o2)O1	6.9078
496	CCC1COC(Cn2cncn2)(c2cc3cc(Cl)cc(Cl)c3o2)O1	6.9078
497	CC1COC(Cn2cncn2)(c2cc3cc(Cl)cc(Cl)c3o2)O1	6.9078
498	CC1(C)COC(Cn2cncn2)(c2cc3cc(Cl)cc(Cl)c3o2)OC1	6.9078
499	COc1cc(OC)c2oc(C3(Cn4cncn4)OCCO3)cc2c1	6.9078
500	Clc1ccc2oc(C3(Cn4cncn4)OCCCO3)cc2c1	6.9078
501	CCC1COC(Cn2cncn2)(c2cc3cc(Cl)ccc3o2)O1	6.9078
502	COC(Cn1cncn1)(OC)c1cc2ccccc2o1	6.9078
503	CC1CCOC(Cn2cncn2)(c2cc3ccccc3o2)O1	6.9078
504	CS(=O)(=O)c1nc(-c2ccc(F)cc2)n(-c2ccc(Cl)cc2)n1	5.4806
505	CSc1nc(-c2ccc(Cl)cc2)n(-c2ccc(Cl)cc2)n1	6.6464
506	c1ccc(Cn2cncn2)cc1	6.5793
507	c1ccc(-n2cncn2)cc1	6.5132
508	c1ccc(-n2cnnc2)cc1	4.8978
509	CSc1nc(C(C)(C)C)nn1C(=O)N(C)C	2.7081
510	C1CNCCNC1	7.948
511	O=NN1CCCCCCCC1	6.3386
512	COP(=O)(OC)ON1C(=O)c2cccc3cccc(c23)C1=O	4.2485
513	c1ccc2c(c1)ncn2P(n1cnc2ccccc21)n1cnc2ccccc21	7.9725
514	FC(F)(F)c1nc2ccccc2[nH]1	3.3322
515	FC(F)(F)c1nc2cc(Cl)c(Cl)cc2[nH]1	2.0669
516	O=C1NC(=O)c2cccc3cccc1c23	9.2103
517	CCCCCCCO	8.7323
518	CCCCCCCCCCCCCCCC[N+](C)(C)CC(=O)[O-]	7.3902
519	CCCCCCS	7.1341
520	CCCCCCO	6.5793
521	CCCCC(C)(C)CO	7.6962
522	Cc1cn(-c2c(Cl)cccc2Cl)c(N)n1	5.5215
523	O=NNC1=NCCN1Cc1ccc(Cl)nc1	7.824
524	O=C(c1ccc2ccccc2n1)N1CCN=C1Nc1c(Cl)cccc1Cl	3.7842
525	O=C(c1cccnc1)N1CCN=C1Nc1c(Cl)cccc1Cl	4.382
526	c1ccc2oc(C3(Cn4ccnc4)OCCCO3)cc2c1	6.9078
527	c1ccc2oc(C3(Cn4ccnc4)OCCO3)cc2c1	6.9078
528	COCC1COC(Cn2ccnc2)(c2cc3ccccc3o2)O1	6.9078
529	CC1(C)COC(Cn2ccnc2)(c2cc3ccccc3o2)OC1	6.9078
530	Clc1cc(Cl)c2oc(C3(Cn4ccnc4)OCCCO3)cc2c1	6.9078
531	CCOCC1COC(Cn2ccnc2)(c2cc3cc(Cl)cc(Cl)c3o2)O1	6.9078
532	CCOCC1COC(Cn2ccnc2)(c2cc3cc(Cl)cc(Cl)c3o2)O1	6.9078
533	COCC1COC(Cn2ccnc2)(c2cc3cc(Cl)cc(Cl)c3o2)O1	6.9078
534	COCC1COC(Cn2ccnc2)(c2cc3cc(Cl)cc(Cl)c3o2)O1	6.9078
535	CCC1COC(Cn2ccnc2)(c2cc3cc(Cl)cc(Cl)c3o2)O1	6.9078
536	CC1COC(Cn2ccnc2)(c2cc3cc(Cl)cc(Cl)c3o2)O1	6.9078
537	Clc1ccc2oc(C3(Cn4ccnc4)OCCO3)cc2c1	6.9078
538	Clc1ccc(Cn2ccnc2-c2ccccc2)cc1	5.9915
539	Cc1ccc2oc(C3(Cn4ccnc4)OCCO3)cc2c1	6.9078
540	O=C(c1ccc(Cl)cc1)n1ccnc1-c1ccccc1	5.9915
541	Cc1nccn1Cc1ccccc1	6.9078
542	Brc1nc[nH]c1Br	6.2146
543	Brc1cnc[nH]1	5.5215
544	NCCCn1ccnc1	7.4844
545	Nc1n[nH]c2ccc(C(F)(F)F)cc12	4.4998
546	C1CCc2c(OCCN3CCOCC3)n[nH]c2C1	7.3778
547	CC(=O)OC1=C(c2c(C)cc(C)cc2C)C(=O)c2ccccc21	8.9872
548	CC(C)(C)c1ccc2c(c1)C(C)(C)CC2	9.6486
549	Cc1cc(C)c(C2C(=O)c3ccccc3C2=O)c(C)c1	6.9078
550	O=C1c2ccccc2C(=O)C1c1c(Cl)cccc1Cl	6.1527
551	CC(C)(C)c1cc(C2C(=O)c3ccccc3C2=O)cc(C(C)(C)C)c1	5.2679
552	c1ccc(-c2cc3ccccc3[nH]2)cc1	8.6995
553	Brc1ccc2[nH]cc(CC3CCNCC3)c2c1	3.2189
554	CN1CCc2ccccc21	7.1309
555	COc1ccc2c(c1)c(CC(=O)OCOC(=O)c1cccc(C)c1)c(C)n2C(=O)c1ccc(Cl)cc1	4.6634
556	COc1ccc2c(c1)c(CC(=O)Oc1cccc(C(F)(F)F)c1)c(C)n2C(=O)c1ccc(Cl)cc1	5.7268
557	COc1ccc2c(c1)c(CC(=O)OCOC(=O)c1ccccc1)c(C)n2C(=O)c1ccc(Cl)cc1	4.2905
558	COc1ccc2c(c1)c(CC(=O)Oc1cccc(Cl)c1)c(C)n2C(=O)c1ccc(Cl)cc1	5.8289
559	COc1ccc2c(c1)c(CC(=O)Oc1cccc(C)c1)c(C)n2C(=O)c1ccc(Cl)cc1	4.585
560	Cc1[nH]c2ccc(O)cc2c1CC(=O)OCC(=O)O	8.294
561	O=C1c2ccccc2C(=O)N1CC1CO1	8.4553
562	Cc1ccc(SN2C(=O)c3ccccc3C2=O)cc1	8.5291
563	CCCCN1C(=O)c2cccc([N+](=O)[O-])c2C1=O	7.6158
564	CCCCN1C(=O)c2ccc([N+](=O)[O-])cc2C1=O	7.2004
565	CN(CCn1cnc2c1c(=O)n(C)c(=O)n2C)c1ccccc1	7.9655
566	CN(CCCn1cnc2c1c(=O)n(C)c(=O)n2C)c1ccccc1	7.4018
567	C=CCn1c(=O)c2[nH]c(C)nc2n(CCCC)c1=O	3.1781
568	CCCCn1c(=O)n(CCC)c(=O)c2[nH]c(C)nc21	2.7081
569	C=CCn1c(=O)c2[nH]c(C)nc2n(CC(C)C)c1=O	2.8332
570	CCCn1c(=O)c2[nH]c(C)nc2n(CC(C)C)c1=O	2.9444
571	O=c1ncc2[nH]c(=O)[nH]c2[nH]1	7.5066
572	O=c1[nH]c2[nH]cnc(=O)c2[nH]1	7.4725
573	Clc1cn[nH]c1	6.2672
574	Cc1cc(-c2ccccc2)[nH]n1	7.4955
575	Cc1ccn(C(N)=O)n1	6.7214
576	Cc1ccn(C(=O)NCCCCCCCl)n1	8.566
577	Cc1ccn(C(=O)NCCCCNC(=O)n2ccc(C)n2)n1	8.4338
578	Cc1ccn(C(=O)NCCCCCCNC(=O)n2ccc(C)n2)n1	8.4867
579	CNC(=O)c1cnn(C(C)(C)C)c1C#N	5.9713
580	CCOC(=O)c1cnn(-c2cccc(C)c2)c1S(C)(=O)=O	6.2146
581	CCOC(=O)c1cnn(-c2ccccc2)c1N	6.2146
582	CCOC(=O)c1cnn(-c2cccc(C)c2)c1C#N	6.2146
583	CCCCOc1nn(-c2cccc(C(F)(F)F)c2)c2ncccc12	6.9078
584	COc1nn(-c2cccc(C(F)(F)F)c2)c2ncccc12	6.9078
585	CCCOc1nn(-c2cccc(C(F)(F)F)c2)c2ncccc12	6.9078
586	Nc1ncnc2[nH]ncc12	4.9488
587	O=C1C=CC(=O)N1CCCCCCN1C(=O)C=CC1=O	6.3099
588	Cc1ccc(C(=O)c2ccc(CC(=O)NCCn3cnc4c3c(=O)n(C)c(=O)n4C)n2C)cc1	7.0901
589	Cc1ccc(C(=O)c2ccc(CC(=O)NCC(=O)Nc3cccc(C)c3C)n2C)cc1	7.1701
590	COc1ccc(OC)c(NC(=O)CNC(=O)Cc2ccc(C(=O)c3ccc(C)cc3)n2C)c1	7.293
591	COc1ccccc1NC(=O)CNC(=O)Cc1ccc(C(=O)c2ccc(C)cc2)n1C	7.346
592	Cc1ccc(C(=O)c2ccc(CC(=O)NCC(=O)Nc3cccc(Cl)c3)n2C)cc1	7.2584
593	Cc1ccc(C(=O)c2ccc(CC(=O)NNCC(=O)N3CCN(C)CC3)n2C)cc1	6.8855
594	COc1ccccc1OC(=O)Cc1ccc(C(=O)c2ccc(C)cc2)n1C	7.3132
595	Cc1nnc(SCCCSc2nnnn2C)o1	6.2146
596	Clc1cccc(SCc2nn[nH]n2)c1	7.6962
597	Cn1ccnc1Cc1nn[nH]n1	8.0552
598	CCSCCCSc1nnnn1C	6.2146
599	FC(F)(F)c1cccc(Nc2ccccc2-c2nn[nH]n2)c1	6.1203
600	CCN(CC)C(=O)CCCn1nnnc1C	6.2146
601	CCN(C(=O)CCCn1nnnc1C)C1CCCCC1	6.2146
602	CCN(C(=O)CCCCc1nnnn1-c1ccccc1)C1CCCCC1	6.2146
603	O=NN(O)c1ccccc1	6.1944
604	C=C1C(=CC=C2CCCC3(C)C2CCC3C(C)C=CC(C)C(C)C)CC(O)CC1O	1.2528
605	CCOC(=O)N1C(=O)NC(c2ccccc2)(c2ccccc2)C1=O	8.1605
606	CC(C)COCC(C)O	8.364
607	Cc1c(CC(=O)O)c2c(n1CC(C)C)CC(C)(C)CC2=O	8.0064
608	Cc1ccccc1N=C=O	7.3778
609	O=C=Nc1ccc([N+](=O)[O-])cc1	7.3778
610	COc1ccccc1[N+](=O)[O-]	6.6067
611	COCC(C)O	8.298
612	COCC(C)OC(C)=O	9.0516
613	C=COCCOC	8.2687
614	COCC(O)Cn1ccnc1[N+](=O)[O-]	7.6643
615	COc1ccc(C)cc1	7.5601
616	Cc1ccccc1C(C)C	7.6639
617	Cc1ccc(Cc2ccc(C)cc2)cc1	7.4384
618	CC1(C(=O)O)CCCCC1	6.2146
619	Cc1cccc2ccccc12	7.5175
620	CCCCCCCCCCCC(=O)OCC(O)CO	10.8755
621	O=Cc1cccc2ccccc12	6.5028
622	NC(=O)Cc1cccc2ccccc12	7.4325
623	CC(C)=CCN(CC=C(C)C)CCC(CCN(CC=C(C)C)CC=C(C)C)(C(N)=O)c1cccc2ccccc12	6.6846
624	O=C(O)Cc1cccc2ccccc12	6.9078
625	CC(C)=CCN(CC=C(C)C)CCC(C#N)(CCN(CC=C(C)C)CC=C(C)C)c1cccc2ccccc12	6.6846
626	NC(=S)Cc1cccc2ccccc12	4.0943
627	O=S(=O)(O)c1c(O)ccc2ccccc12	8.0615
628	Nc1ccc(S(=O)(=O)O)c2cccc(O)c12	8.7339
629	O=C(O)c1c(O)c(O)cc2ccccc12	10.1064
630	Oc1cccc2ccccc12	7.8594
631	Nc1cccc2ccccc12	5.7038
632	Nc1cccc2c(Cl)ccc(Cl)c12	8.1577
633	O=[N+]([O-])c1cccc(C(F)(F)F)c1	6.4135
634	O=[N+]([O-])c1cccc2ccccc12	5.0106
635	CCC[N+](=O)[O-]	6.1203
636	CCCCCCCCCO	8.1775
637	CCCCCCCCCCCCCCCCCCN	6.9078
638	CCCCCCCCCCCCCCCCCCNC(C)C	7.1468
639	CCCCCCCCCCCCCCCCCCO	9.9035
640	CCCCCCCCN	5.7526
641	CCCCCCCCS	7.7981
642	CCCCCCCCO	8.0709
643	C=CC(O)CCCCC	5.8289
644	C=CC(C)(O)CCCCC	7.4955
645	CCCCCCCCN1CCCC1=O	7.6256
646	O=C(O)c1nn(Cc2ccc(Cl)cc2)c2ccccc12	7.0388
647	CN(C)S(=O)(=O)CCCCCNC(=O)N(CCCl)N=O	5.5215
648	CCCCCO	8.2011
649	CCCCC(=O)c1ccc(N)cc1	4.4308
650	C=CC(C)(O)CC	6.5511
651	C=C(C)C(=O)CC	6.0379
652	C=CCCC	8.5092
653	CC(O)COc1ccccc1	8.2242
654	CC(=NO)C(=O)c1ccccc1	8.3523
655	O=C1C=CC(=O)N1c1ccccc1	4.0604
656	NC(=S)Nc1ccccc1	1.0986
657	CN(C)N=Nc1ccccc1	5.7366
658	CC1=NN(c2ccccc2)C(=O)C1	7.5575
659	CCC(=O)OC(C)c1ccccc1	8.5564
660	CCC(CC)Nc1nnc(-c2ccccc2)c2ccccc12	8.9872
661	CC(C)(C)CNc1nnc(-c2ccccc2)c2ccccc12	8.9872
662	O=C(CN1CCNCC1)NN=Cc1ccc([N+](=O)[O-])o1	5.7038
663	CN1CCN(C(=O)NN=Cc2ccc([N+](=O)[O-])o2)CC1	6.6201
664	O=[N+]([O-])c1ccc(C=NNC(=S)N2CCCCC2)o1	6.6201
665	NC(=O)N1CCC(c2ccccc2)CC1	6.672
666	CC(C)CCCCCCCCCCOCCCN	5.7038
667	NCCCOCCCCOCCCN	8.1461
668	CCCS	7.4559
669	CC(C)CS	8.8774
670	CCCO	7.5337
671	CC(C)(CO)S(C)(=O)=O	9.3326
672	OCCCOc1nn(-c2cccc(C(F)(F)F)c2)c2ncccc12	6.9078
673	CN(C)CCCO	7.6639
674	CC(C)OCCCO	8.294
675	CCC(=O)c1ccc2c(c1)N(CCCN1CCN(C)CC1)c1ccccc1S2	6.3969
676	C=CCOCC=C	5.7683
677	C=CCSCC=C	7.9997
678	C=CCI	2.3026
679	CCCOCC(C)O	8.3733
680	C#CCCl	5.1059
681	O=[N+]([O-])c1ccc(C=NNC(=S)N2CCCC2)o1	6.6201
682	CC(O)COC(C)(C)C	8.2351
683	Cc1c(C)c([N+](=O)[O-])c(C(C)(C)C)c([N+](=O)[O-])c1C	8.6995
684	CCCCCCCCCCCCCC[N+](C)(C)[O-]	7.3099
685	CNN=Nc1ccc(C)cc1	5.9425
686	O=C(NC(=O)C(Cl)(Cl)Cl)NS(=O)(=O)c1ccccc1	7.824
687	CCCCCCCCCCCCCO	9.7527
688	CCCCCCCCCCCO	8.0064
689	CN1CCCN(C)C1=O	7.4787
690	O=C1CCc2c(cccc2OCCCN2CCC(O)(c3ccccc3)CC2)N1	6.9078
691	O=C1CCc2cc(C(=O)CCN3CCC(Cc4ccccc4)CC3)ccc2N1	6.2146
692	O=C1CCc2cc(C(=O)CCN3CCN(c4ccccc4)CC3)ccc2N1	6.2146
693	Cc1ccc(C2=CCN(CCC(=O)c3ccc4c(c3)CCC(=O)N4)CC2)cc1	6.2146
694	CCOc1ccccc1N1CCN(CCCc2ccc3c(c2)CCC(=O)N3)CC1	6.2146
695	COc1ccccc1N1CCN(CCCc2ccc3c(c2)CCC(=O)N3)CC1	6.2146
696	O=C1CCc2cc(CCCN3CCN(c4ccccc4)CC3)ccc2N1	6.2146
697	O=C1CCc2cc(CCCCN3CCN(c4ccccc4Cl)CC3)ccc2N1	6.2146
698	CCOc1ccccc1N1CCN(CCCCc2ccc3c(c2)CCC(=O)N3)CC1	6.2146
699	O=C1CCc2cc(C(=O)CCCN3CC=C(c4ccc(Cl)cc4)CC3)ccc2N1	6.2146
700	CC(=O)C1(c2ccccc2)CCN(CCCOc2ccc3c(c2)NC(=O)CC3)CC1	6.9078
701	Cc1cc(O)nc2cc(OCCCN3CCC(Cc4ccccc4)CC3)ccc12	6.9078
702	O=c1ccc2cc(CCCCN3CCN(c4ccccc4)CC3)ccc2[nH]1	6.2146
703	OCCOCCOCCOCCOc1ccccc1	7.1389
704	OCCOc1cc(Cl)c(Cl)cc1Cl	7.3132
705	CC(Oc1cc(Cl)c(Cl)cc1Cl)C(=O)O	6.477
706	O=C(OCCOc1ccc(Cl)cc1Cl)c1ccccc1	7.4384
707	NCCOCCO	8.0064
708	CCCCOCCOCCO	8.8945
709	CCCCOCCOCCOC(C)=O	8.7796
710	CCCCOCCOCCSC#N	4.4998
711	CCOCCOCCO	7.5601
712	CCOCCOCCOC(C)=O	9.3057
713	CCCCC(CC)COCCO	8.0327
714	CCCCC(Oc1ccc([N+](=O)[O-])cc1C=O)C(=O)O	6.2146
715	CC(C)(c1ccccc1)c1cc(-n2nc3ccccc3n2)c(O)c(C(C)(C)c2ccccc2)c1	8.9554
716	Cc1ccc(O)c(-n2nc3ccccc3n2)c1	9.2103
717	CCC(C)(C)c1ccc2c(c1)C(=O)c1ccccc1C2=O	7.3778
718	CC(C)Cc1ccc2ccccc2n1	6.9276
719	CN(C)N=Nc1ccccc1C(N)=O	4.0254
720	Cc1cc(C)c2[nH]c(=O)sc2c1	7.9793
721	CCOc1cc(C)c2nc(O)sc2c1	8.294
722	COc1cc(C)c2[nH]c(=O)sc2c1	8.9333
723	O=c1oc2cc(Cl)ccc2n1CCl	7.7622
724	O=c1oc2cc(Cl)ccc2n1CO	7.9374
725	CCCC(=O)Nc1ccc(Cc2ccccn2)c([N+](=O)[O-])c1	6.7452
726	Fc1ccc(-c2cccs2)cc1	6.2146
727	Cc1ccc(C(C)C=O)cc1	8.1605
728	CC(CC=O)c1ccc(C(C)(C)C)cc1	7.2371
729	CC(=O)OCCC1=CCC2CC1C2(C)C	8.0064
730	CCCCCCCCC=CCCCCCCCC1=NCCN1CCO	6.9893
731	CC(=O)Oc1ccc(Br)cc1C(=O)O	7.03
732	CCC(C)c1cc([N+](=O)[O-])cc([N+](=O)[O-])c1OC(=O)Oc1ccc([N+](=O)[O-])cc1[N+](=O)[O-]	4.6821
733	CCC(C)n1ncn(-c2ccc(N3CCN(c4ccc(O)cc4)CC3)cc2)c1=O	7.8478
734	CCC(C)c1ccccc1O	5.7683
735	C=COCCSCCCC	7.948
736	CCCCN(CCO)CCCC	6.9754
737	C=CC(=O)OCCN(CC)CC	6.6464
738	C=C(C)C(=O)OCCN(CC)CC	8.4545
739	CC(C)N(CCO)C(C)C	6.7569
740	CN(C)C(C)(C)CO	7.4122
741	C=CC(=O)OCCN(C)C	6.1203
742	CCNCCO	6.9078
743	CCS(=O)(=O)CCO	9.7981
744	CNS(=O)(=O)OCC(=O)N1CCCCCC1	7.6207
745	O=[N+]([O-])C(CO)(CO)CO	7.5496
746	Cc1ccccc1C1OCC(O)CO1	8.1315
747	CNC(=O)N(C)c1nnc(C(F)(F)F)s1	5.6276
748	CCN(CCO)c1cccc(C)c1	7.2226
749	CCCCCC(C=O)=Cc1ccccc1	8.2242
750	CCCCCCC(C=O)=Cc1ccccc1	8.0392
751	OCCc1ccccn1	8.2537
752	OCCc1ccncc1	8.1605
753	CC(C)(C)c1cc([N+](=O)[O-])cc([N+](=O)[O-])c1Nc1ccc([N+](=O)[O-])cc1[N+](=O)[O-]	0.6931
754	CC(C)(C)NCCO	7.3902
755	C=C(C)C(=O)OCCNC(C)(C)C	6.6846
756	N#CSCSc1nc2ccccc2s1	7.8391
757	NS(=O)(=O)c1ccccc1C(F)(F)F	5.7038
758	Clc1cc(Cl)c2nsnc2c1Cl	7.3902
759	O=[N+]([O-])c1cc([N+](=O)[O-])c2no[n+]([O-])c2c1	5.2983
760	CC(C)(C)c1ccc2oc(-c3ccc(-c4nc5cc(C(C)(C)C)ccc5o4)s3)nc2c1	9.2103
761	OCCN(CCO)c1cccc(Cl)c1	8.5468
762	CC(C)(C)N(CCO)CCO	7.9073
763	N#CCN(CC#N)CC#N	3.912
764	CC(=O)OC(c1ccc(Cl)c(Cl)c1)C(Cl)(Cl)Cl	9.2103
765	CC(=O)OC(c1ccccc1)C(Cl)(Cl)Cl	8.8247
766	ClC(=Nc1c(Cl)c(Cl)c(Cl)c(Cl)c1Cl)C(Cl)(Cl)Cl	6.9078
767	OCC(F)(F)F	5.1761
768	FC1(F)COC1(F)F	5.7038
769	O=C(c1ccc(O)cc1O)c1ccc(O)cc1O	7.1066
770	ClC1=C(Cl)C2(Cl)C3CC(Cl)(Cl)CC3C1(Cl)C2(Cl)Cl	6.2146
771	CC(CC(C)(C)C)CC(C)(C)C	9.6158
772	O=C(CCl)c1ccc(Cl)cc1Cl	5.7038
773	CC(C)C(=O)OCC(C)(C)C(OC(=O)C(C)C)C(C)C	8.0709
774	CC(C)C(=O)OCC(C)(C)C(O)C(C)C	8.0709
775	CC(C)(c1cc(Cl)c(O)c(Cl)c1)c1cc(Cl)c(O)c(Cl)c1	8.9136
776	CC1(C)CC(=O)CC(C)(C)N1	6.9078
777	CC1(C)CC(N)CC(C)(C)N1	6.809
778	CCC(C)(C#N)N=NC(C)(C#N)CC	5.8111
779	C1OC1C1CO1	4.3567
780	c1ccc(-c2ccccn2)nc1	4.6052
781	C=CCOCC(CC)(CO)COCC=C	8.7796
782	O=C(Nc1ccccc1SSc1ccccc1NC(=O)c1ccccc1)c1ccccc1	8.294
783	N#CC(Br)(Br)C(N)=O	5.4596
784	CCC1(CC)C(=O)N2Cc3ccccc3CN2C1=O	7.6148
785	CC(C)(CO)CO	8.7641
786	CC(C)(C)C(=O)O	6.8024
787	CC(C)=CCl	8.404
788	NC(=O)C(c1ccccc1)c1ccccc1	6.3969
789	O=C(Cl)C(c1ccccc1)c1ccccc1	8.7531
790	c1ccc2sc(SSc3nc4ccccc4s3)nc2c1	9.3927
791	CC(C)(C1CCCO1)C1CCCO1	5.7038
792	CCc1cc(Cc2cc(CC)cc(C(C)(C)C)c2O)c(O)c(C(C)(C)C)c1	9.2103
793	NCCOCCN	6.868
794	O=[N+]([O-])C(F)(COCC(COCC(F)([N+](=O)[O-])[N+](=O)[O-])(N(F)F)N(F)F)[N+](=O)[O-]	6.6995
795	OCCSCCO	8.7963
796	OCc1c(F)c(F)c(F)c(F)c1F	6.8024
797	O=CC12CC=CCC1C1CC=CCC1O2	7.824
798	Clc1nc(C(Cl)(Cl)Cl)c(Cl)c(Cl)c1Cl	7.5175
799	Oc1cc(Cl)c(Cl)c(Cl)c1Cl	4.9416
800	Oc1c(Cl)cc(Cl)c(Cl)c1Cl	4.9416
801	Clc1cc2oc3c(Cl)c(Cl)c(Cl)cc3c2cc1Cl	-0.1054
802	C=C(Cl)C(Cl)CCl	5.8319
803	COc1c(Cl)c(Cl)c([N+](=O)[O-])c(Cl)c1Cl	5.5607
804	O=[N+]([O-])c1c(Cl)c(Cl)cc(Cl)c1Cl	7.1357
805	Clc1cc(Cl)c(Cl)nc1Cl	6.9078
806	CCCS(=O)(=O)c1c(Cl)cnc(Cl)c1Cl	7.0031
807	O=C(O)c1cc(I)cc(I)c1I	6.7007
808	Cc1cc(O)c(C)c(C)c1O	8.0709
809	CNC(=O)Oc1cc(C)cc(C)c1C	5.4467
810	Cc1cnc(C)c(C)n1	6.6921
811	O=C(O)c1c(Cl)ccc(Cl)c1Cl	6.477
812	Brc1cc2c(cc1Br)Oc1cc(Br)c(Br)cc1O2	-2.3026
813	CC(=O)C(C)=O	8.0064
814	OCC(Br)CBr	6.5236
815	OCC(Cl)CCl	4.4998
816	C=C(Cl)CCl	5.7683
817	O=C(O)c1cccc(Cl)c1Cl	5.7038
818	O=[N+]([O-])c1cccc(Cl)c1Cl	6.2383
819	Clc1nc2ccccc2nc1Cl	5.273
820	O=c1c2ccccc2nc2n1OCC2	5.9789
821	O=C(O)C(S)C(S)C(=O)O	8.294
822	COc1ccc2c(=O)c(C)c(C)oc2c1CN1CCOCC1	3.7842
823	Cc1cccc(N)c1C	6.8352
824	Cc1cccc(C#N)c1C	8.0064
825	Cc1cccc([N+](=O)[O-])c1[N+](=O)[O-]	6.8145
826	CC1OC1C	7.6732
827	CCC(=O)C(C)=O	8.0064
828	CCC1(CC)C(=O)C=CN(CN2CCNCC2)C1=O	7.2004
829	CCC1(CC)C(=O)C=CN(CN2CCOCC2)C1=O	7.5756
830	CCn1c(=O)c2ccccc2n(-c2cccc(C(F)(F)F)c2)c1=O	7.3132
831	CC(C)(C)CC(C)(C)N	5.7462
832	CCCCC(CC)COC(=O)COc1cc(Cl)c(Cl)cc1Cl	6.2146
833	CCCCOCCOC(=O)COc1cc(Cl)c(Cl)cc1Cl	6.2146
834	CC(C)OC(=O)COc1cc(Cl)c(Cl)cc1Cl	6.2046
835	Brc1nc(Br)c(Br)[nH]1	3.5264
836	CN(C)C(=O)n1c(Br)nc(Br)c1Br	3.912
837	CCCCOC(=O)n1c(Br)nc(Br)c1Br	3.7842
838	Clc1nc(Cl)c(Cl)[nH]1	2.3979
839	Oc1cc(Cl)c(Cl)cc1Cl	6.7093
840	O=C(O)COc1cc(Cl)c(Cl)cc1Cl	6.2146
841	Ic1nc(I)c(I)[nH]1	5.6276
842	Cc1cc(C)c(N)cc1C	7.1309
843	O=C1NC(=O)C(=c2[nH]c(=C3C(=O)NC(=O)NC3=O)c3ccccc23)C(=O)N1	9.2103
844	Cc1cc2c(cc1NNC1C(=O)NC(=O)NC1=O)=NC(=O)N=2	8.6995
845	CC(C)c1cc(C(C)C)c(N)c(C(C)C)c1N	7.3265
846	Oc1c(Br)cc(Br)cc1Br	7.3038
847	Nc1c(Cl)cc(Cl)cc1Cl	7.7832
848	ClCc1c(Cl)cc(Cl)cc1Cl	8.0311
849	Oc1c(Cl)cc(Cl)cc1Cl	6.7093
850	Clc1nc(Cl)nc(Cl)n1	5.8749
851	Oc1c(I)cc(I)c(O)c1I	9.0119
852	Cc1cc(C)c(N)c(C)c1	6.6107
853	Cc1cc(C)nc(C)c1	5.9915
854	Cc1c([N+](=O)[O-])c(C)c([N+](=O)[O-])c(C(C)(C)C)c1[N+](=O)[O-]	9.2103
855	Cc1c([N+](=O)[O-])cc([N+](=O)[O-])cc1[N+](=O)[O-]	6.6783
856	C=CCOc1nc(OCC=C)nc(OCC=C)n1	6.6241
857	CN(C)Cc1cc(CN(C)C)c(O)c(CN(C)C)c1	7.8633
858	CC(C)(C)c1cc(C(C)(C)C)c(O)c(C(C)(C)C)c1	7.4206
859	O=C1c2cc([N+](=O)[O-])ccc2-c2c1cc([N+](=O)[O-])cc2[N+](=O)[O-]	9.2013
860	CC(C)(CO)C1OCC2(CO1)COC(C(C)(C)CO)OC2	7.824
861	Nc1ccc(-c2ccccc2N)cc1	5.7398
862	COCCCNc1nc(NCCCOC)nc(SC)n1	7.2442
863	CCCCC(CC)COC(=O)COc1ccc(Cl)cc1Cl	6.7616
864	CCCCOCCCOC(=O)COc1ccc(Cl)cc1Cl	6.2146
865	CCCCOC(=O)COc1ccc(Cl)cc1Cl	6.3969
866	CC(C)CCCCCOC(=O)COc1ccc(Cl)cc1Cl	6.8896
867	CC(C)OC(=O)COc1ccc(Cl)cc1Cl	6.5511
868	O=C(O)CCCOc1ccc(Cl)cc1Cl	6.5511
869	CCCCOC(=O)CCCOc1ccc(Cl)cc1Cl	5.7038
870	CCCCOCCOC(=O)COc1ccc(Cl)cc1Cl	6.7226
871	COc1ccc(N)cc1N	6.1312
872	Nc1ccc(S(=O)(=O)O)c(N)c1	8.1548
873	Cc1ccc(N)cc1N	4.2905
874	Oc1ccc(Br)cc1Br	3.912
875	Clc1ccc(C(Cl)(Cl)Cl)c(Cl)c1	8.0583
876	Nc1ccc(Cl)cc1Cl	7.3778
877	FC(F)(F)c1ccc(Cl)cc1Cl	7.6732
878	O=C(Cl)c1ccc(Cl)cc1Cl	8.4425
879	O=[N+]([O-])c1ccc(Cl)cc1Cl	6.8977
880	Oc1ccc(Cl)cc1Cl	7.6256
881	O=C(O)COc1ccc(Cl)cc1Cl	6.2146
882	O=S(=O)(Oc1ccc(Cl)cc1Cl)c1ccccc1	6.9078
883	O=C(O)Cc1ccc(Cl)cc1Cl	7.824
884	Cc1ccc(Cl)cc1Cl	7.7832
885	Nc1ccc(F)cc1F	6.7093
886	O=[N+]([O-])c1ccc(F)cc1F	5.2983
887	O=Cc1ccc(O)cc1O	5.9915
888	O=C(c1ccccc1)c1ccc(O)cc1O	9.0595
889	COc1ccc(N)c(OC)c1	6.1399
890	Cc1ccc(N)c(C)c1	6.5367
891	Cc1nc(C)c(C(=O)Nc2ccccc2)s1	8.2761
892	CC(C)C(=O)C(C)C	8.1708
893	Cc1ccc(O)c(C)c1	7.7407
894	Cc1ccnc(C)c1	5.2983
895	Nc1ccc([N+](=O)[O-])cc1[N+](=O)[O-]	5.6525
896	O=[N+]([O-])c1cc([N+](=O)[O-])c(Nc2c(Br)cc(Br)cc2Br)c(C(F)(F)F)c1	1.4816
897	O=[N+]([O-])c1ccc(O)c([N+](=O)[O-])c1	4.2627
898	Cc1ccc([N+](=O)[O-])cc1[N+](=O)[O-]	5.591
899	C1=CC(C2OCC3(CC=CCC3)CO2)CCC1	8.5545
900	C=C(CC(C)(C)c1ccccc1)c1ccccc1	5.7038
901	CC(C)COC(=O)COc1ccc(Cl)cc1Cl	5.7038
902	CCC(C)(C)c1ccc(O)c(C(C)(C)CC)c1	5.7991
903	NC(=S)NC(N)=S	1.6094
904	CCC=CC=CC=O	7.0475
905	CC=CC=CC#N	6.5681
906	CC=CC=CCOC(=O)CCC	8.0583
907	CC(CN1C(=O)N(CC2CO2)C(C)(C)C1=O)OCC1CO1	7.4955
908	CC1(C)OC(=O)N(c2cc(Cl)cc(Cl)c2)C1=O	8.0064
909	CC(O)CC(C)O	8.8335
910	CC(=O)CC(C)=O	6.6333
911	Cc1cc(C)c(O)c(CCCCc2cc(C)cc(C)c2O)c1	8.6125
912	COCCOCCOCCOCCOC	8.5448
913	O=C1C=CC(=NCl)C=C1	4.6052
914	CC1=CC(=O)C(C)=C(C)C1=O	5.2983
915	O=C(O)c1cc(Cl)cc([N+](=O)[O-])c1Cl	8.1605
916	Nc1cc(Cl)c([N+](=O)[O-])cc1Cl	7.9445
917	CC(=O)Nc1cc(Cl)ccc1Cl	8.3187
918	Nc1cc(Cl)ccc1Cl	7.3778
919	Oc1cc(Cl)ccc1Cl	6.363
920	COc1ccc(OC)c(C=O)c1	8.0709
921	CC(C)(C)OOC(C)(C)CCC(C)(C)OOC(C)(C)C	8.0709
922	CC(C)(O)C#CC(C)(C)O	9.105
923	Cc1ccc(C)c(N)c1	7.1678
924	Cc1ccc(C)c(O)c1	6.0958
925	Cc1cnc(C)cn1	6.9276
926	Cc1ccc(C)nc1	6.6846
927	Cc1ccc(C)[nH]1	4.0775
928	Cc1cc([N+](=O)[O-])ccc1[N+](=O)[O-]	6.248
929	O=C1C=CC(=O)O1	6.9373
930	CC1=CC(=O)OC1=O	7.8633
931	CCCCCCC=CC1CC(=O)OC1=O	7.0012
932	CC(=O)CCC(C)=O	7.6382
933	CN1C(=O)CCC1=O	8.6995
934	CCC12COP(OC1)OC2	2.1282
935	CC(C)CC(C)CC(O)CC(C)C	9.741
936	CCC(C)c1cccc(C(C)CC)c1O	5.2983
937	Nc1nc2c(s1)CC(N)CC2	6.5147
938	Nc1c(Br)cc([N+](=O)[O-])cc1Br	6.2146
939	Nc1cc(Cl)c(N)c(Cl)c1	6.5511
940	CCc1cccc(CC)c1N	7.4955
941	CC(C)c1cccc(C(C)C)c1N	8.5384
942	COc1cccc(OC)c1C(=O)O	6.2146
943	COc1cccc(OC)c1O	6.3099
944	CC1CNCC(C)O1	7.948
945	CC(C)CCCC(C)(C)O	8.8247
946	CC(C)CC(O)CC(C)C	8.1775
947	C=CC(C)=CCCC(C)(C)O	7.4384
948	Cc1cccc(C)c1N	6.7334
949	Cc1cccc(C)c1O	5.6904
950	Cc1cncc(C)n1	6.7799
951	Cc1cccc(C)n1	5.9915
952	Cc1c([N+](=O)[O-])cccc1[N+](=O)[O-]	5.1761
953	CN(C)Cc1cc(C(C)(C)C)c(O)c(C(C)(C)C)c1	5.8999
954	CC(C)(C)c1cc([N+](=O)[O-])cc(C(C)(C)C)c1O	5.5215
955	CC(C)=CCCC(C)=CC#N	8.0392
956	Cc1c(N)cccc1N	8.0064
957	Cc1cccc2sc3nncn3c12	5.5215
958	Cc1ccc(S(=O)(=O)Oc2cc(S(=O)(=O)O)cc3cc(S(=O)(=O)O)cc(N)c23)cc1	9.3501
959	CCCN(CCC)C(=O)CN(CC)P(=S)(OCC)OCC	7.6406
960	CCCCOCCOCCOCCO	8.5755
961	CCOCCOCCOCCO	8.9554
962	COCCOCCOCCO	9.2591
963	CN(C)CCOCCOC(=O)NCC1(C)CC(NC(=O)OCCOCCN(C)C)CC(C)(C)C1	5.2983
964	CCCCCCOCCOCCO	7.7832
965	CC(Oc1ccc(Oc2ncc(Cl)cc2Cl)cc1)C(=O)N1CCCO1	6.2146
966	O=C([O-])C=CC(=O)O	9.278
967	C=C1CCC(O)CC1=CC=C1CCCC2(C)C1CCC2C(C)CCC(O)C(C)(C)O	2.3026
968	CC(=O)c1ccccn1	7.7319
969	C=CC(=O)NC(C)(C)CS(=O)(=O)O	8.5942
970	C=CCOCC(CC)(CO)CO	8.5031
971	Nc1nncs1	5.5334
972	Nc1ccc2ccccc2c1S(=O)(=O)O	9.561
973	CCC(C)(N)C#N	4.3041
974	CC(C)(N)CO	7.9725
975	Cc1cccnc1N	4.6052
976	Cc1c(N)cc([N+](=O)[O-])cc1[N+](=O)[O-]	7.2399
977	Cc1cc(S(=O)(=O)O)c(N)cc1Cl	9.4174
978	Nc1cc(Cl)ccc1O	6.5367
979	Nc1cc([N+](=O)[O-])ccc1O	7.7832
980	Cc1ccc(N)c(S(=O)(=O)O)c1	9.3673
981	N#Cc1cc([N+](=O)[O-])ccc1N	8.2646
982	Nc1ccc([N+](=O)[O-])cc1O	8.294
983	Nc1nc(O)cc(O)n1	9.3057
984	CC(C)CCCC(C)N	6.2879
985	Nc1ccc2c(c1)C(=O)c1ccccc1C2=O	8.0709
986	CCN(CC)CCN	7.948
987	Nc1ccc2c(S(=O)(=O)O)cccc2c1S(=O)(=O)O	8.5997
988	Nc1ccccc1O	7.1701
989	Nc1ncc2[nH]cnc2n1	6.5834
990	Nc1ccccn1	5.2983
991	Nc1nccs1	6.1738
992	COc1ccccc1N	7.3165
993	S=c1[nH]c2ccc(Cl)cc2[nH]1	5.0106
994	NC(=O)c1cc2cc(CN3CCCCC3)ccc2o1	5.5215
995	O=C(NC(CCc1ccc2c(c1)OCO2)CCc1ccc2c(c1)OCO2)c1cc2ccccc2o1	8.294
996	COc1cc2nc(N)sc2cc1OC	7.0605
997	CC(C)N(Sc1nc2ccccc2s1)C(C)C	8.5564
998	CN1CCN(C(=O)Cn2c(=O)sc3ccc(Cl)cc32)CC1	6.4615
999	O=c1[nH]c2ccccc2o1	6.5511
1000	O=c1[nH]c2c(Cl)c(Cl)cc(Cl)c2o1	6.2146
1001	O=c1[nH]c2cc(Cl)c(Cl)cc2o1	6.5511
1002	Nc1ccc2oc(=O)[nH]c2c1	6.9078
1003	O=c1[nH]c2cc(Br)ccc2o1	6.9565
1004	CN(C)Cn1c(=O)oc2ccc(Cl)cc21	6.9078
1005	CCn1c(=O)oc2ccc(Cl)cc21	7.2079
1006	O=c1oc2ccc(Cl)cc2n1CO	6.9078
1007	O=c1[nH]c2ccc(Br)cc2o1	6.9078
1008	O=C(NN=C1SCCS1)c1ccccc1	4.2877
1009	Nc1ccccc1-c1ccccc1	7.7579
1010	O=C(O)c1ccccc1-c1ccccc1CO	8.7796
1011	O=P(Oc1ccccc1)(Oc1ccccc1)Oc1ccccc1-c1ccccc1	9.6678
1012	CC(C)(Br)C(=O)Br	5.7038
1013	Nc1c(Br)cc([N+](=O)[O-])cc1[N+](=O)[O-]	8.3187
1014	CCCCCCCCCCCCC(Br)C(=O)O	6.6846
1015	CCC(C)N	5.0239
1016	CCC(C)N	5.9402
1017	CCC(C)S	8.5518
1018	CCC(C)O	8.7765
1019	CCC(C)=NO	6.8352
1020	CCC(C)(OO)OOC(C)(CC)OO	6.1821
1021	CC(=O)CCc1ccc(-c2ccccc2)cc1	6.9373
1022	OCC=CCO	7.1309
1023	COC(=O)C=CC(=O)OC	7.7142
1024	CC(C)CC(C)OC(=O)C=CC(=O)OC(C)CC(C)C	8.9011
1025	CC(C)OC(=O)C=CC(=O)OC(C)C	7.6686
1026	CC=CC#N	6.2166
1027	CC=CC(=O)O	6.9078
1028	CCOC(=O)C=C(C)C	9.3588
1029	CC=CC(=O)OCC	8.0064
1030	CC=CC(=O)OC	8.0709
1031	CCCCOCCO	6.4216
1032	CCCCOCCOC(C)=O	7.7832
1033	CCCCC(CC)(CO)CO	8.0064
1034	CCCCCCC(CO)CCCC	10.1861
1035	CCCCc1ccccc1O	6.452
1036	OCC#CCO	4.654
1037	CCOP(=O)(OCC)OC(=CCl)c1cc(Cl)ccc1Cl	3.5553
1038	CC(=O)Oc1cccc(Oc2ccc(C(F)(F)F)cc2Cl)c1	7.824
1039	O=[N+]([O-])c1cc(C(F)(F)F)cc([N+](=O)[O-])c1Cl	6.8352
1040	O=CC1=C(Cl)C(=CO)CCC1	5.2983
1041	CS(=O)(=O)c1ccc(N)c(Cl)c1	9.159
1042	COc1nc(Cl)nc(OC)n1	6.7685
1043	COc1ccc(N)cc1Cl	6.3099
1044	Nc1ccc([N+](=O)[O-])cc1Cl	8.7687
1045	COc1ccc([N+](=O)[O-])cc1Cl	7.0733
1046	Nc1cc([N+](=O)[O-])ccc1Cl	7.6084
1047	O=Cc1cc([N+](=O)[O-])ccc1Cl	8.0709
1048	O=C(CCl)c1ccccc1	4.8442
1049	C=C(Cl)C#N	3.2189
1050	C=C(Cl)C(OC(C)=O)OC(C)=O	5.7683
1051	Nc1ccccc1Cl	6.9236
1052	O=Cc1ccccc1Cl	8.0552
1053	NC(=O)c1ccccc1Cl	7.2371
1054	N#Cc1ccccc1Cl	5.9814
1055	O=S(=O)(Cl)CCCl	5.4806
1056	OCCCl	4.0604
1057	C=CC(=O)OCCCl	5.193
1058	CCSCCCl	5.5294
1059	C=C(C)C(=O)OCCCl	5.2983
1060	C=COCCCl	5.3471
1061	Oc1nc(CCl)nc2sc3c(c12)CCCC3	9.105
1062	ClCCN(CCCl)CCCl	1.6094
1063	CC(=O)C(Cl)C(=O)N(C)C	5.6168
1064	Clc1ccc2ccccc2c1	7.6392
1065	Cc1cccc(C)c1N(COC(C)C)C(=O)CCl	6.8824
1066	Oc1ccccc1Cl	6.5073
1067	CC(Cl)CO	5.7038
1068	CC(Cl)C(=O)O	6.6846
1069	C=Cc1ccccc1Cl	8.5564
1070	Cc1ccccc1Cl	7.3778
1071	N#CCC(N)=O	8.0709
1072	C=CC(=O)OCCC#N	5.193
1073	N#CNC1=NCCS1	6.2146
1074	CNC(=O)CC#N	6.5236
1075	CC(CO)C1CCCCCCCCCCC1	9.2103
1076	O=C1C=CCCC1	5.3936
1077	CC(=O)OCCC1CCCCC1	8.0709
1078	O=C1C(Cl)=C(Cl)C(Cl)(Cl)C1(Cl)Cl	5.1818
1079	CNC(=O)Oc1ccccc1C1CCCC1	5.2311
1080	CC=CC=CC(=O)O	8.9038
1081	CCOC(C)CO	8.8693
1082	CC=Cc1ccc(OCC)c(O)c1	7.7832
1083	CCOc1ccccc1C(N)=O	7.6962
1084	CCOCCO	7.4651
1085	CCOCCOC(C)=O	8.2687
1086	C=CC(=O)OCCOCC	6.9754
1087	CCOc1ccc2ccccc2c1	8.0424
1088	CCC(CC)CN	5.9661
1089	CCCC(O)C(CC)CO	8.4416
1090	CCC(CC)CO	7.5229
1091	CCCCC(CC)CO	7.6271
1092	CCC(CO)(CO)CO	9.5539
1093	CCCC=C(C=O)CC	8.0064
1094	CCc1occc(=O)c1O	7.0475
1095	CCc1cccc(C)c1N	6.7856
1096	CCc1ccccc1N	7.1389
1097	CCc1ccc2c(c1)C(=O)c1ccccc1C2=O	7.9356
1098	C=CC(=O)OCC(CC)CC	8.778
1099	CCC(C=O)CC	8.289
1100	CCC(CC)C(=O)O	7.6962
1101	CCCCC(C=O)CC	7.9128
1102	CCCCC(CC)C(=O)O	7.6222
1103	CCCCC(CC)COC(=O)C(CC)CCCC	10.2036
1104	CCCCC(CC)COC(=O)c1ccc([N+](=O)[O-])cc1	7.6962
1105	CCCCC(CC)COC(C)=O	8.0064
1106	C=CC(=O)OCC(CC)CCCC	8.6305
1107	CCCCC(CC)COC(=O)c1ccccc1	7.824
1108	CCCCC(CC)COC(=O)Cl	8.5979
1109	CCCCC(CC)COP(=O)(O)O	8.1461
1110	CCCCC(CC)COP(=O)(Oc1ccccc1)Oc1ccccc1	9.6678
1111	CCCCC(CC)COP(Oc1ccccc1)Oc1ccccc1	8.3089
1112	CCCCC(CC)COC(=O)C=CC(=O)OCC(CC)CCCC	10.2819
1113	CCCCC(CC)COCC1CO1	8.9619
1114	CCCCC(CC)COS(=O)(=O)O	8.3248
1115	CCCCC(CC)COC(=O)CS	5.7137
1116	CCCCC(CC)CN	6.1092
1117	C=C(F)CO	4.8675
1118	CS(=O)(=O)c1ccc(F)c(C(=O)O)c1	7.824
1119	Fc1cccc(C(F)(F)F)n1	3.912
1120	NC(=O)CF	2.7081
1121	OCCF	1.6094
1122	CCN(CC)C(=S)NN=Cc1ccc([N+](=O)[O-])o1	6.6201
1123	CN(C)C(=S)NN=Cc1ccc([N+](=O)[O-])o1	6.6201
1124	CCOC(=O)Nc1ccco1	7.5934
1125	Cc1ccc(C=O)o1	7.6962
1126	COc1cc2nc(N3CCC(N(C)C(=O)c4ccco4)CC3)nc(N)c2cc1OC	6.9078
1127	COC(=O)c1ccco1	5.7038
1128	C=CC1(C)CCC(C(C)(C)O)O1	7.0475
1129	COc1ccccc1OCCOC(=O)c1ccccc1OC(C)=O	7.9841
1130	O=C1NN=C(c2ccccc2)CO1	6.089
1131	S=c1[nH]n(-c2ccccc2)c(=S)s1	6.6373
1132	CN1CN(CCO)CSC1=S	6.9078
1133	C#CCN1C(=O)CN=C(c2ccccc2)c2cc([N+](=O)[O-])ccc21	6.7754
1134	C=CCOc1ccc(C2c3ccc(OC)cc3OC(C)(C)C2c2ccccc2)cc1	6.2146
1135	COc1ccc2c(c1)OC(C)(C)C(c1ccccc1)C2c1ccc(OCCBr)cc1	6.2146
1136	COc1ccc2c(c1)OC(C)(C)C(c1ccccc1)C2c1ccc(OCCCCl)cc1	6.2146
1137	C=CCOc1ccc(C2=C(c3ccccc3)C(C)(C)Oc3cc(OC)ccc32)cc1	6.2146
1138	Cc1c(C)c2c(c(C)c1O)CCC(C)(C(=O)O)O2	8.3664
1139	Cc1nn(-c2ccc3cc(-c4ccccc4)c(=O)oc3c2)nc1-c1ccccc1	7.824
1140	COc1ccc2ccc(=O)oc2c1	8.3664
1141	Cc1ccc2ccc(=O)oc2c1	8.2428
1142	O=c1[nH]c2ccccc2[nH]1	7.7319
1143	Oc1nc2ccccc2n1CCCN1CCC(n2c(O)nc3ccccc32)CC1	8.9872
1144	Cn1c(=O)n(-c2ccccc2)c2cc(Cl)ccc21	6.9078
1145	CCCCCCCCCCCCCCCCCC1=NCCN1	8.0615
1146	CCCCCCCCCCCCCCCCCC1=NCCN1CCO	8.2428
1147	CCCCCC(C)O	7.8555
1148	CCCCCC(C)=O	7.4206
1149	CCCCC=CC=O	7.1701
1150	CCCCC(C)=O	7.8594
1151	CCCC=CC(OCC)OCC	6.7569
1152	CCCC=CC(OC)OC	7.4384
1153	N#CC=CCCC#N	5.9402
1154	CCCCCCOCCO	6.7214
1155	CC(=O)Oc1ccc(C2(c3ccc(OC(C)=O)cc3)C(=O)N(C(C)=O)c3ccccc32)cc1	6.2146
1156	O=c1ncc2nc[nH]c2[nH]1	6.9422
1157	CCOC1CCC=CO1	8.7258
1158	CCCC1CC(C)(OC(C)=O)CCO1	8.4118
1159	CN1C(C(=O)Nc2ccccn2)=C(O)c2sc(O)cc2S1(=O)=O	4.6052
1160	COc1cc2c(s1)C(O)=C(C(=O)Nc1ccccn1)N(C)S2(=O)=O	4.0943
1161	CC(C)=CCOC1=C(C(=O)Nc2ccccn2)N(C)S(=O)(=O)c2cc(Cl)sc21	3.4012
1162	CN1C(C(=O)Nc2ccccn2)=C(Nc2ccccn2)c2sc(Cl)cc2S1(=O)=O	3.4012
1163	CN1C(C(=O)Nc2ccccn2)=C(OP2(=O)OCCCO2)c2sc(Cl)cc2S1(=O)=O	2.3026
1164	CC(C)(O)C(=O)c1ccc(OCCO)cc1	8.3143
1165	CC(C)(O)C#N	2.9285
1166	CC(C)(O)C(=O)c1ccccc1	7.4348
1167	Cc1cccc(C(=O)O)c1O	6.0981
1168	COc1ccc(C(=O)c2ccccc2)c(O)c1	9.4572
1169	N#Cc1ccccc1O	6.2146
1170	C=CC(=O)OCCO	6.3063
1171	OCCSSCCO	5.1533
1172	C=C(C)C(=O)OCCO	8.5271
1173	CCCCCCCCSCCO	9.0513
1174	C=CC(=O)OCC(C)O	5.5215
1175	CC(O)COC(=O)CBr	6.4983
1176	CCCCCCCCCCCC(=O)OCC(C)O	10.4516
1177	CC(O)COS(C)(=O)=S	6.6771
1178	C=C(C)C(=O)OCCN=C=O	7.1365
1179	CC(C)Oc1ccccc1[N+](=O)[O-]	7.824
1180	CC(C)c1ccccc1N	7.0733
1181	Sc1nc2ccccc2[nH]1	5.7038
1182	S=c1[nH]c2ccccc2s1	4.6052
1183	OCCS	5.4972
1184	COC(C)CO	8.65
1185	COc1nccc(C(F)(F)F)c1S(=O)(=O)Cl	8.0485
1186	COc1cc(C)ccc1O	6.6067
1187	COc1cc([N+](=O)[O-])ccc1N	6.9048
1188	COc1ccc(C)cc1N	7.2793
1189	COc1ccc([N+](=O)[O-])cc1N	7.7187
1190	COCC=O	7.7536
1191	COc1ccccc1C=O	7.824
1192	COCCO	7.7706
1193	COCCOC(C)=O	8.2764
1194	C=CC(=O)OCCOC	6.7069
1195	COCCOC(N)=O	9.3057
1196	COCCOC(=O)CC#N	8.3664
1197	COc1ccccc1O	6.5862
1198	Cc1c(O)cccc1O	5.2983
1199	CC1OCCO1	7.9725
1200	Cc1cc(N)ccc1N	4.625
1201	CCC(C)CO	8.3362
1202	Cc1ccc2ccccc2c1N	6.4297
1203	CCCC(C)CO	7.2513
1204	CC(C)(O)Cc1ccccc1	7.1546
1205	CC(C)CO	7.8079
1206	CC(O)CC(C)(C)O	8.2161
1207	CCC(C)(C)O	6.9078
1208	Cn1sccc1=O	4.654
1209	Cc1c(O)cc([N+](=O)[O-])cc1[N+](=O)[O-]	3.2189
1210	C=CC(C)C#N	5.4467
1211	C#CC(C)(C)O	7.2584
1212	CSc1ccc(C(=O)C(C)(C)N2CCOCC2)cc1	7.2004
1213	Cc1cc([N+](=O)[O-])cc([N+](=O)[O-])c1O	3.1781
1214	CC(C)(O)CCc1ccccc1	7.6962
1215	Cc1ccc([N+](=O)[O-])cc1N	6.3526
1216	Cc1ccc([N+](=O)[O-])cc1S(=O)(=O)O	8.2188
1217	C=Cc1ccc(C)nc1	7.0622
1218	C=CC(=C)CCCC(C)(C)O	8.5755
1219	C=CC(=C)CCCC(C)(C)OC(C)=O	8.7483
1220	Cc1ccccc1N	6.5073
1221	CCC(C)C=O	8.837
1222	CC(C=O)=Cc1ccccc1	7.6256
1223	Cc1ccc2ccccc2c1	7.3963
1224	CCCCCCC(C)(C)S	8.6216
1225	CCC=C(C)C=O	8.364
1226	CCCC(C)C=O	8.0709
1227	CC(CN)CCCN	7.4325
1228	CC(C#N)CCC#N	5.9915
1229	CC(CCC(=O)O)C(=O)O	5.7038
1230	CCCC(C)C(=O)O	7.6207
1231	CCCC(C)COC(C)=O	8.9092
1232	CC1CNCCN1	7.6158
1233	CC(C)C=O	8.2161
1234	CC(C)C#N	4.6052
1235	CC(C)C(=O)O	7.8312
1236	Cc1cnccn1	7.4955
1237	Cc1ccccn1	6.672
1238	CC1CCCO1	5.7038
1239	NCCN1CCOCC1	8.0064
1240	CC(C)Cc1ccc2cc(CC(=O)O)ccc2c1	6.9078
1241	COc1ccc2cc(C(C)C(=O)OCCN3CCN(Cc4ccc(N)cc4)CC3)ccc2c1	7.3778
1242	COc1ccc2cc(C(C)C(=O)OCCN3CCN(Cc4ccccc4)CC3)ccc2c1	7.0031
1243	CCc1cc2c(cc1C=O)C(C)(C)CCC2(C)C	8.0709
1244	COc1cc(NC(=O)c2cc3ccccc3cc2O)c(OC)cc1Cl	9.6158
1245	CC(=O)Nc1ccccc1CCNC(=O)c1ccc2ccccc2c1O	8.0709
1246	O=C(O)c1ccc2ccccc2c1	8.4118
1247	O=C(O)c1cc2ccccc2c(N=Nc2cc(Cl)ccc2Cl)c1O	7.824
1248	O=S(=O)(O)c1ccc2cc(Nc3cccc4c(O)c(S(=O)(=O)O)ccc34)ccc2c1O	9.3057
1249	Nc1cccc2cc(S(=O)(=O)O)ccc12	9.561
1250	CCOc1cc(N)c2ccc(S(=O)(=O)O)cc2c1	9.3927
1251	Oc1ccc2ccccc2c1	7.5807
1252	CC(C)C1CCC2CC(O)CCC2C1	8.3428
1253	O=C(O)COc1ccc2ccccc2c1	6.3969
1254	Nc1ccc2ccccc2c1	6.5889
1255	O=[N+]([O-])c1ccccc1-c1ccccc1	7.1148
1256	CC(C(c1ccc(Cl)cc1)c1ccc(Cl)cc1)[N+](=O)[O-]	6.6201
1257	Nc1ccc(N)c([N+](=O)[O-])c1	7.4955
1258	CC(=O)c1ccccc1[N+](=O)[O-]	7.3778
1259	Nc1ccccc1[N+](=O)[O-]	7.3778
1260	O=[N+]([O-])c1ccc2ccccc2c1	8.3894
1261	O=[N+]([O-])c1cc2c(ccc3ccccc32)o1	6.0845
1262	O=[N+]([O-])c1ccccc1O	5.8111
1263	CC(C)[N+](=O)[O-]	6.5793
1264	CN(N=O)c1ccccn1	4.0943
1265	Cc1ccccc1[N+](=O)[O-]	7.6497
1266	CCCCCCCC(C)=O	8.0709
1267	CCCCCCC(C)=CC#N	7.4501
1268	OCC1CC2CCC1C2	7.3778
1269	CCCCCCC(C)O	8.0709
1270	CCCCCCC(C)=O	8.0356
1271	CCCCCC=CCC1CC(=O)OC1=O	7.0012
1272	O=C1C(=O)c2ccccc2C(O)=C1CC=C(Cl)Cl	5.6384
1273	O=[N+]([O-])c1ccc(C(O)C2COC(C(Cl)Cl)=N2)cc1	8.6995
1274	CC(C)(C)CC(C)(C)S	3.9512
1275	CCCC(C)=O	8.0709
1276	CC(=O)CC(C)(C)N(C)N=O	7.6497
1277	CC(=O)CCCOC(C)=O	8.7128
1278	CC(=O)OCCCC(=O)CBr	6.3969
1279	CCCCCC1=CCCC1=O	7.6962
1280	CC(CO)Oc1ccccc1	7.948
1281	OCCOc1ccccc1	7.5496
1282	O=c1c(Cl)c(Cl)cnn1-c1ccccc1	7.832
1283	OCCc1ccccc1	7.434
1284	CC(C)C(=O)OCCc1ccccc1	8.5564
1285	CC(=O)OCCc1ccccc1	8.5564
1286	O=C(Cc1ccccc1)OCCc1ccccc1	9.6158
1287	CCC(=O)OCCc1ccccc1	8.294
1288	CCCCC(C#N)c1ccccc1	3.912
1289	Oc1ccccc1-c1ccccc1	6.9078
1290	CC(CO)c1ccccc1	7.7407
1291	CC(C)(O)c1ccccc1	7.1701
1292	COC(OC)C(C)c1ccccc1	7.5229
1293	O=C(O)CCC(CC(=O)O)(C(=O)O)P(=O)(O)O	8.294
1294	CCN(C(C)C)C(C)C	5.2983
1295	OCCNCC(O)CNCCO	8.8818
1296	CC(C)(C)N=NC(C)(C)O	5.7961
1297	CC(=O)CSc1nnnn1C	6.2146
1298	COc1ccc(CC(C)=O)cc1	8.1107
1299	CC(=O)CNC(C)(C)Cc1ccccc1	5.4161
1300	CC(=O)CNC(C)(C)Cc1ccc(Cl)cc1	5.5215
1301	O=C(C(F)(F)Cl)C(F)(Cl)Cl	5.624
1302	O=C(C(F)(F)Cl)C(F)(F)Cl	4.1109
1303	O=COCC=Cc1ccccc1	7.9725
1304	CC(C=O)=Cc1ccco1	7.2442
1305	C=C(C)C(=O)NCO	6.7488
1306	C=CC(OC(C)=O)OC(C)=O	3.5553
1307	C=C(F)C(=O)OCC(F)(F)C(F)F	4.0943
1308	C=C(O)C(=O)O	9.2103
1309	C=CC(=O)OCCN=C=O	5.7038
1310	C=COCCOC(=O)C(=C)C	8.6895
1311	C=C(C)C(=O)OCCSCC	8.9092
1312	CCCc1ccccc1O	6.2146
1313	C#CCOC(C)=O	5.5215
1314	C#CC(=O)O	4.6052
1315	C#CCOCC#C	6.2897
1316	Nc1ccc(S(=O)(=O)c2ccc(NCCO)cc2)cc1	8.294
1317	O=Cc1ccccn1	6.3716
1318	Clc1cccc(Cl)c1Nc1ncccn1	8.4596
1319	O=C1CCCN1	8.7796
1320	CC(C)N1CCCC1=O	7.9725
1321	O=C1CCCN1c1cccc2cccnc12	7.4085
1322	CCCCN1CCCC1=O	5.7038
1323	CCC(C)C1CCCCC1=O	7.7832
1324	COc1ccc(O)c(C(C)(C)C)c1	7.9759
1325	Cc1ccc(O)c(C(C)(C)C)c1	7.824
1326	Cc1ccc(C(C)(C)C)c(O)c1	5.7683
1327	CC(=O)OC1CCCCC1C(C)(C)C	8.4338
1328	CC(C)(C)c1ccccc1O	6.0868
1329	S=C1NCCS1	5.7038
1330	C1CCC(CNC2=NCCS2)CC1	3.912
1331	FC(F)(F)c1cccc(CNC2=NCCS2)c1	3.912
1332	Cc1ccc(CNC2=NCCS2)cc1	5.2983
1333	c1ccc2c(NC3=NCCS3)cccc2c1	3.912
1334	S=C1NCNCN1	1.5261
1335	Cc1ccccc1C#N	8.0709
1336	C=Cc1ccccn1	5.2983
1337	CCCCC(CC)COCCC#N	8.5011
1338	CCCCC(CC)COCCCN	5.7683
1339	N#CCCn1ccnc1	6.2146
1340	CCN(CC)NNCCCO	8.2242
1341	O=CC=Cc1ccco1	6.7569
1342	O=[N+]([O-])c1nccn1CC(O)CO	8.5323
1343	O=NN(CCCl)C(=O)NC1CC2CCC1C2	4.4188
1344	CC(C)(C)c1cc(CCC(=O)O)ccc1O	6.9078
1345	Cc1cn(-c2cc(N)cc(C(F)(F)F)c2)cn1	5.7038
1346	CC(C)(C)c1ccc(CCC=O)cc1	7.901
1347	Cc1ccc(S(=O)(=O)C=CC#N)cc1	7.2724
1348	CCCCC(CC)CCl	8.9011
1349	CN(C)CCCN	7.5337
1350	COP(=O)(CCC(=O)NCO)OC	9.4727
1351	CCN(CCC#N)c1cccc(C)c1	8.2188
1352	CCN(C(=O)Oc1cccc(NC(=O)OC(C)C)c1)c1ccccc1	8.294
1353	CSCCC=O	6.1944
1354	Nc1cccc(C(F)(F)F)c1	5.7038
1355	O=C=Nc1cccc(C(F)(F)F)c1	8.7954
1356	O=S1(=O)CC(Cl)(Cl)C(Cl)(Cl)C1	4.4659
1357	CC1CC(O)CC(C)(C)C1	8.0864
1358	NCCCOCCOCCOCCCN	7.9551
1359	ClCC1(CCl)COC1	6.3969
1360	Nc1ccc(-c2ccc(N)c(Cl)c2)cc1Cl	8.248
1361	COc1cc(-c2ccc(N)c(OC)c2)ccc1N	7.5601
1362	CSCC(=NO)C(C)(C)C	6.7007
1363	CC(=O)C(C)(C)C	6.4135
1364	CC(C)=CC(=O)O	8.1775
1365	CC(=O)OCC=C(C)C	7.9725
1366	N#CCCNCCC#N	7.901
1367	N#CCCOCCC#N	7.948
1368	O=C(O)CCSCCC(=O)O	8.0064
1369	N#CCCSCCC#N	8.3452
1370	COc1c(O)c(Cl)c(Cl)c(Cl)c1Cl	7.4325
1371	COc1c(O)cc(Cl)c(Cl)c1Cl	7.9997
1372	OB(O)c1cc(F)c(F)c(F)c1	5.7038
1373	CNC(=O)Oc1cc(C)c(C)c(C)c1	5.1818
1374	Nc1ccc(Cl)c(Cl)c1	6.3456
1375	N#Cc1ccc(Cl)c(Cl)c1	5.2983
1376	O=[N+]([O-])c1ccc(Cl)c(Cl)c1	6.8596
1377	O=C=Nc1ccc(Cl)c(Cl)c1	4.5109
1378	NC(=O)Nc1ccc(Cl)c(Cl)c1	6.2146
1379	O=CC1CCC=CO1	8.5011
1380	COC1CCC=CO1	7.2513
1381	CC1=C(C(=O)Nc2ccccc2)CCCO1	9.6158
1382	O=C1CCc2ccccc2O1	7.2862
1383	COc1ccc(N)cc1OC	6.5236
1384	Cc1ccc(N)cc1C	6.697
1385	Cc1ccc(O)cc1C	6.5889
1386	Cc1ccc([N+](=O)[O-])c([N+](=O)[O-])c1	6.6933
1387	Cc1cc(O)c(C(C)(C)C)cc1C	6.9373
1388	CC(CC=O)CC(C)(C)C	8.0833
1389	CC(CC(=O)O)CC(C)(C)C	7.0562
1390	CC(=O)OCCC(C)CC(C)(C)C	8.3547
1391	Oc1nc(Cl)c(Cl)cc1Cl	6.6846
1392	O=C=Nc1cc(Cl)cc(Cl)c1	8.8537
1393	O=C(Nc1ccc(Cl)c(Cl)c1)c1cc(Cl)cc(Cl)c1O	5.4931
1394	CNC(=O)Oc1cc(C(C)C)cc(C(C)C)c1	5.2983
1395	Cc1cc(C)cc(N)c1	6.561
1396	Cc1cc(C)cc(O)c1	6.4102
1397	Cc1cc(C)[nH]n1	7.4483
1398	Cc1cncc(C)c1	3.912
1399	Cc1cc([N+](=O)[O-])cc([N+](=O)[O-])c1	5.3753
1400	CCCCC1C(=O)N(c2cccc(O)c2)N(c2cccc(O)c2)C1=O	6.9078
1401	CCC1C(=O)N(c2ccccc2)N(c2ccccc2)C1=O	6.6201
1402	CCCC1C(=O)N(c2ccccc2)N(c2ccccc2)C1=O	6.271
1403	O=C1C(CCC2CC2)C(=O)N(c2ccccc2)N1c1ccccc1	5.9915
1404	CCCCC1(CCc2ccccn2)C(=O)N(c2ccccc2)N(c2ccccc2)C1=O	8.4118
1405	COC(=O)c1c(C(F)F)nc(C(F)(F)F)c(C(=O)OC)c1CC(C)C	7.2584
1406	CC(C)OC(=O)c1cncc(C(=O)OC(C)C)c1	8.5622
1407	O=NN1CC=CCO1	6.8024
1408	CC1OC(=O)C(C)OC1=O	8.5043
1409	CCC(C)(O)C#CC(C)(O)CC	7.2442
1410	CCC(C)=CCCC(C)=CC#N	7.8633
1411	CC(C)=CCCC(C)CCOC=O	9.036
1412	CC(C)=CCCC(C)CC#N	8.5755
1413	CC12CCC3(CCCC(C)(C)C3C1)OC2=O	7.3778
1414	O=C(CCS)OCC(COC(=O)CCS)(COC(=O)CCS)COC(=O)CCS	6.9078
1415	CN(C)C(=O)Nc1ccc(SC(F)(F)Cl)c(Cl)c1	5.8171
1416	CN1CC(O)N(c2cc(C(C)(C)C)on2)C1=O	6.2146
1417	CCN(CCC#N)c1ccccc1	8.4847
1418	N#CC1CC=CCC1	6.1312
1419	Cc1cc(=S)c(N)n[nH]1	7.5883
1420	Cc1ccc(C(N)=O)cc1N	7.4541
1421	CCn1c2ccccc2c2cc(N)ccc21	4.9698
1422	CC(=O)c1cccc(N)c1	7.5337
1423	Nc1cccc(O)c1	6.8244
1424	N#CCCNc1ccccc1	8.4553
1425	COc1cc(C)c2[nH]c(C)c(CCN3CC4CCC(CC4)C3)c2c1	6.6682
1426	CCc1oc2ccccc2c1CC(=NCCN1CCOCC1)NO	7.5496
1427	NC(=O)Cc1c([O-])on[n+]1Cc1ccccc1	8.4007
1428	O=C(Nc1ccc(Cl)c(Cl)c1)c1cc(Cl)cc(-c2ccccc2)c1O	6.9078
1429	Cc1cc(F)ccc1NC(=O)c1cc(Cl)cc(-c2ccc(Cl)cc2)c1O	7.828
1430	CC12CCC(C(Br)C1=O)C2(C)C	8.4007
1431	CC1(C)C(=O)N(Br)C(=O)N1Cl	6.1841
1432	O=Cc1cccc(Br)c1	7.0264
1433	COC(=O)CCBr	7.3778
1434	CC(=O)C(C)=Cc1ccccc1	8.3187
1435	CCCCOC(=O)C(Cl)(Cl)C(Cl)=C(Cl)Cl	7.6449
1436	COc1ccc(C(N)=O)cc1C(=O)NCc1cccnc1	7.453
1437	CC1=CCC2C(C1)C2(C)C	8.4764
1438	OCC(O)CCl	3.2581
1439	C=C(CCl)CCl	5.0106
1440	Cc1c(N)cccc1Cl	6.3526
1441	C=C(C)CCl	6.7429
1442	O=C1OC(O)C(C(Cl)Cl)=C1Cl	4.852
1443	O=C(O)Cc1ccc(OCc2ccccc2)c(Cl)c1	7.9445
1444	Cc1ccc(N)cc1Cl	5.8579
1445	Nc1cccc(Cl)c1	5.5452
1446	Oc1cccc(Cl)c1	6.3456
1447	N#CCCCl	2.3026
1448	CCCCCCCCS(=O)CCCCl	8.6412
1449	OCC1(CO)CC=CCC1	7.4674
1450	O=C(O)C1CC=CCC1	8.357
1451	CN(C)CCC#N	7.8633
1452	CCOCCCO	8.8537
1453	CCOc1cc(C=O)ccc1O	8.0583
1454	CCOCCC#N	8.0709
1455	CCc1nccnc1C	6.3969
1456	COc1n[nH]c(=O)n1C	7.824
1457	CCCCC(O)CC	7.5337
1458	CCCCC(=O)CC	7.923
1459	CCC=CCC=O	7.3524
1460	CCCCCCOCC(O)CO	7.824
1461	CCOC(=O)c1cc2c(ccc3ccccc32)oc1=O	7.3652
1462	O=C1CC(Nc2ccc([N+](=O)[O-])cc2)=NN1c1c(Cl)cc(Cl)cc1Cl	8.0709
1463	O=C1CC(Nc2ccc(Cl)cc2Cl)=NN1c1c(Cl)cc(Cl)cc1Cl	8.0709
1464	O=C(O)c1cc2ccccc2cc1O	6.8533
1465	CCOc1ccc(NC(=O)CC(C)O)cc1	8.8537
1466	CC(O)CC=O	7.6871
1467	CNC(=O)Oc1cccc2c1OC(C)(C)C2O	2.8904
1468	O=C(O)Cc1ccccc1Nc1c(Cl)ccc(O)c1Cl	6.6516
1469	CCC1(O)CN2CCC1CC2C(O)c1ccnc2ccc(OC)cc12	6.3969
1470	N#CCCO	8.0709
1471	Cn1c2c(c(=O)n1-c1ccccc1)CCCC2	7.3132
1472	CCCCNC(=O)OCC#CI	7.3132
1473	CC(=O)Oc1c(C)ncc2c1COC(C(C)C)OC2	7.9551
1474	CC(C)c1cccc(OC(=O)N(C)C)c1	5.0752
1475	CCOC(=O)c1noc(C)c1C(C)=O	6.9078
1476	CCOC(=O)c1nocc1C(=O)c1ccccc1	6.9078
1477	CCOC(=O)c1noc(C)c1C(=O)c1ccccc1	6.9078
1478	CNC(=O)Oc1cccc2c1OC(C)(C)C2=O	5.687
1479	OCCCS	4.7536
1480	O=C(O)CCS	4.5643
1481	COc1cccc(N)c1	6.2653
1482	COC(C)CCOC(C)=O	8.3452
1483	COc1cccc(O)c1	6.3919
1484	COCCC#N	8.3871
1485	COCCCN	6.5339
1486	CC(CCO)CCO	8.9598
1487	Cc1cc(N)n(-c2ccccc2)n1	7.824
1488	CNN=Nc1ccccc1	6.0403
1489	CC(=O)C(C)C	4.9972
1490	CC(C)=CCO	6.697
1491	CC(C)=CCOC(=O)c1ccccc1	8.4553
1492	CC(C)=CCOC(=O)c1ccccc1O	8.0709
1493	CCC(C)(O)CC	6.5653
1494	CSc1ccc(O)cc1C	8.1315
1495	CNC(=O)Oc1ccc(SC)c(C)c1	3.912
1496	Cc1cnccc1N	6.1003
1497	Cc1cccc(N=Nc2ccc(N(C)C)cc2)c1	7.3132
1498	CC1=CCC(C=CC(C)C(C)O)C1(C)C	6.9078
1499	CC(CCO)CCc1ccccc1	7.7407
1500	Cc1cccc(N)c1	7.2654
1501	Cc1cccc(C#N)c1	8.0064
1502	CC(C)=CC=O	6.5367
1503	C=C(C)CCO	8.6015
1504	C=C(C)C(C)=O	5.193
1505	CC(C)CC=O	8.6552
1506	CC(=O)OCCC(C)C	9.7172
1507	CC(C)CCON=O	6.2246
1508	Cc1c[nH]c2ccccc12	8.1461
1509	Cc1cccc(NC(=O)c2ccccc2C(=O)O)c1	8.5622
1510	Cc1cc[nH]n1	5.7038
1511	Cc1cccnc1	5.9915
1512	O=[N+]([O-])CCCO	4.3438
1513	CC(=O)c1cccc([N+](=O)[O-])c1	8.0864
1514	Nc1cccc([N+](=O)[O-])c1	6.2823
1515	O=[N+]([O-])c1cccc(O)c1	6.4615
1516	CN(N=O)c1cccnc1	2.3026
1517	O=NN1CCCOC1	6.3969
1518	Cc1cccc([N+](=O)[O-])c1	6.9754
1519	CNC(=O)ON=C(C)C(C)(C)[N+](=O)[O-]	2.5649
1520	CCCCC(C=CC(C)=O)CC	9.0021
1521	CCCCCC(C)(O)CC	8.1315
1522	O=c1cc[nH]c(=O)o1	6.7452
1523	CCC(O)CC	7.5337
1524	CCC(=O)CC	7.6686
1525	CC=CC(C)=O	8.0709
1526	CC=CCC#N	4.2767
1527	O=Cc1cccc(Oc2ccccc2)c1	7.1082
1528	OCc1cccc(Oc2ccccc2)c1	7.3106
1529	ClCc1cccc(Oc2ccccc2)c1	7.1099
1530	OCCCc1ccccc1	7.7407
1531	O=C(C=Cc1ccccc1)OCC=Cc1ccccc1	8.3428
1532	CC(=O)OCC=Cc1ccccc1	8.1017
1533	O=C(OCC=Cc1ccccc1)c1ccccc1	8.294
1534	CCC(=O)OCC=Cc1ccccc1	8.1315
1535	O=CC=Cc1ccccc1	7.6962
1536	N#CC=Cc1ccccc1	8.3309
1537	CC(=O)OCCCc1ccccc1	8.4553
1538	CCC=C1OC(=O)c2ccccc21	7.4085
1539	O=C1CCN(c2ccccc2)N1	6.9641
1540	CC(=O)CCc1c(OC(=O)c2ccccc2)n(-c2ccccc2)n(-c2ccccc2)c1=O	7.7489
1541	CCCCc1c(OC(=O)c2ccccc2)n(-c2ccccc2)n(-c2ccccc2)c1=O	7.6953
1542	N#Cc1cccnc1	7.0775
1543	O=S1(=O)CC=CC1	7.8427
1544	NC1CCS(=O)(=O)C1	9.7926
1545	CC(=O)OC1CCC(NCc2ccccc2N)CC1	8.2067
1546	CC(C)(C)CC(C)(C)c1ccc(O)cc1	8.304
1547	C=CCn1ccc(=O)c(O)c1C	6.6846
1548	Cc1cc(=O)nc(SCc2ccccc2N(C)C)[nH]1	7.7832
1549	CC(=O)C=CC1C(C)C=C(C)CC1C	8.5564
1550	CCCC(C)C(c1ccc(O)cc1)C(C)C	7.5496
1551	O=[N+]([O-])c1ccc(Nc2ccc(O)cc2)c([N+](=O)[O-])c1	9.6557
1552	CC(=O)C=CC1=C(C)CCCC1(C)C	8.4316
1553	OCCN1CCOCC1	8.6125
1554	CCC(C)(C)c1ccc(O)cc1	7.5121
1555	Oc1ccc(Nc2ccc3ccccc3c2)cc1	8.5564
1556	CN(C)N=Nc1ccc(C(N)=O)cc1	3.989
1557	CCOc1ccccc1N1CCN(C(=O)CCC2CCCCC2)CC1	7.7923
1558	CC(C)c1nc2ccccc2c(=O)n1-c1ccncc1	6.6201
1559	Cc1cc(-n2c(C)nc3ccccc3c2=O)n(-c2ccccc2)n1	7.4955
1560	CC(=O)CCc1ccc(OC(C)=O)cc1	8.019
1561	CNC(=O)c1cc(Oc2ccc(N)c(F)c2)ccn1	5.7038
1562	COc1cc(CCC(C)=O)ccc1O	7.8555
1563	CC(=O)CCc1ccc(O)cc1	7.1854
1564	CC(=O)Nc1ccc(S(=O)(=O)Cl)cc1	8.0709
1565	Oc1ccc(OCc2ccccc2)cc1	8.0709
1566	CCC(C)c1ccc(O)cc1	7.8038
1567	CC(=O)Nc1ccc(C(=O)CCl)cc1	7.6732
1568	COc1ccc(CCl)cc1OC	8.4553
1569	CCN(CC)c1ccc(C=O)cc1	8.7641
1570	CCN(CC)c1ccc(C=O)c(O)c1	7.724
1571	c1cc(N(CC2CO2)CC2CO2)ccc1OCC1CO1	6.9441
1572	CN(C)c1ccc(N=Nc2ccccc2)cc1	5.2983
1573	CN(C)c1ccc(SC#N)cc1	6.2146
1574	CC1(CO)CN(c2ccccc2)NC1=O	6.3386
1575	Cc1cc(O)cc(C)c1S(C)(=O)=O	6.9078
1576	CSc1c(C)cc(O)cc1C	6.9078
1577	OCCCCSc1ccc(Cl)cc1	7.2442
1578	CCC(C)(C)C1CCC(=O)CC1	8.4553
1579	O=C=Nc1ccc(OC(F)(F)F)cc1	7.3297
1580	Nc1ccc(C(F)(F)F)cc1	4.852
1581	CCCCC(CC)C(c1ccc(O)cc1)c1ccc(O)cc1	5.7038
1582	CC(C)(c1ccc(Oc2ccc(N)cc2)cc1)c1ccc(Oc2ccc(N)cc2)cc1	5.7301
1583	C1CN(CCOCCN2CCOCC2)CCO1	7.6133
1584	Cc1ccc(C(=O)CC(=O)C(F)(F)F)cc1	5.7038
1585	Oc1ccc(-c2ccc(O)cc2)cc1	8.5011
1586	c1cc(-c2ccncc2)ccn1	5.1475
1587	CNc1ccc(C(O)(c2ccc(N(C)C)cc2)c2ccc(N(C)C)cc2)cc1	6.2146
1588	COCc1ccc(-c2ccc(COC)cc2)cc1	7.2196
1589	Nc1ccc(Cc2ccc(N)cc2)cc1	4.7875
1590	NC1CCC(CC2CCC(N)CC2)CC1	5.8579
1591	O=S(=O)(c1ccc(Cl)cc1)c1ccc(Cl)cc1	8.0064
1592	COC(CC(C)=O)OC	8.7323
1593	COc1ccc(Nc2ccc(OC)cc2)cc1	7.812
1594	CC1(C)COCN1	6.9441
1595	O=[N+]([O-])c1ccc(C=Cc2ccc([N+](=O)[O-])cc2S(=O)(=O)O)c(S(=O)(=O)O)c1	9.4415
1596	O=C=Nc1ccc(Cc2ccc(N=C=O)cc2)cc1	9.127
1597	C1CN(SSN2CCOCC2)CCO1	8.6305
1598	CC(C)(C)c1cc(Cc2cc(C(C)(C)C)c(O)c(C(C)(C)C)c2)cc(C(C)(C)C)c1O	10.0858
1599	Nc1ccc(Cc2ccc(N)c(Cl)c2)cc1Cl	7.0388
1600	NNS(=O)(=O)c1ccc(Oc2ccc(S(=O)(=O)NN)cc2)cc1	7.7407
1601	Nc1ccc(Oc2ccc(N)cc2)cc1	6.5862
1602	O=S(=O)(c1ccc(O)cc1)c1ccc(O)cc1	8.4242
1603	Cc1cc(O)c(C(C)(C)C)cc1Sc1cc(C(C)(C)C)c(O)cc1C	7.76
1604	Cc1cc(Sc2cc(C)c(O)c(C(C)(C)C)c2)cc(C(C)(C)C)c1O	8.7546
1605	Nc1ccc(Sc2ccc(N)cc2)cc1	7.0031
1606	Oc1ccc(Sc2ccc(O)cc2)cc1	8.1203
1607	O=C1OC(=O)c2c(Br)c(Br)c(Br)c(Br)c21	9.2103
1608	FC(F)(F)c1nc2c(Cl)c(Cl)c(Cl)c(Cl)c2[nH]1	-1.6094
1609	O=C(Nc1ccc(Br)cc1)c1cc(Br)ccc1O	6.0162
1610	Cc1ccccc1CNC1=NCCS1	5.0999
1611	O=C(O)Cc1cc(O)ccc1Nc1c(Cl)cc(O)cc1Cl	6.9078
1612	Cc1ncsc1C	6.8669
1613	CCCSc1nc(Cl)c([N+](=O)[O-])c(Cl)n1	5.7038
1614	Clc1cc(Cl)ncn1	5.2983
1615	CC(C)C1OCC=CCO1	7.0616
1616	C1=CC2C3CCC(C3)C2C1	6.5073
1617	O=CCC1CC2CC1C1CCCC21	6.2146
1618	C1CC2CC1C1SSSC21	5.7038
1619	COc1ccc(-c2cc(N)c3c(c2O)C(=O)c2c(N)ccc(O)c2C3=O)cc1	8.7609
1620	CCN(CC)c1ccc(C=NN(c2ccccc2)c2ccccc2)cc1	9.2103
1621	O=[N+]([O-])c1cc(Cl)c(N=Nc2ccc(N3CCS(=O)(=O)CC3)cc2)c(Cl)c1	8.0709
1622	CC(=O)Nc1ccc(CC(=O)O)cc1	9.6024
1623	Nn1cnnc1	9.5178
1624	Cc1c([N+](=O)[O-])cc(N)cc1[N+](=O)[O-]	6.8659
1625	Nc1ccc(O)c([N+](=O)[O-])c1	8.1017
1626	Nc1c(Cl)cc(C(=O)O)cc1Cl	8.4377
1627	CC(=O)Nc1ccc(N)cc1	7.824
1628	CC(=O)c1ccc(N)cc1	5.9428
1629	Nc1ccc(S(=O)(=O)O)cc1	9.488
1630	Nc1ccc(C(=O)O)cc1	8.6995
1631	CCCCCC(=O)c1ccc(N)cc1	5.3753
1632	Nc1ccc(O)cc1	5.9269
1633	CCC(=O)c1ccc(N)cc1	5.5683
1634	Nc1ccncc1	3.0445
1635	Oc1ccc(Nc2ccccc2)cc1	8.1017
1636	NS(=O)(=O)c1c(Cl)c(Cl)c(Cl)c2[nH]c(C(F)(F)F)nc12	4.4188
1637	CCN(CC)S(=O)(=O)c1c(Cl)c(Cl)c(Cl)c2[nH]c(C(F)(F)F)nc12	2.4159
1638	CN(C)S(=O)(=O)c1c(Cl)c(Cl)c(Cl)c2[nH]c(C(F)(F)F)nc12	1.5686
1639	O=S(=O)(O)c1c(Cl)c(Cl)c(Cl)c2[nH]c(C(F)(F)F)nc12	5.3845
1640	O=C(O)Cc1ccc(-c2ccccc2F)cc1	6.4583
1641	Nc1ccc(-c2ccccc2)cc1	6.2146
1642	Oc1cc(Cl)c(Br)cc1Cl	7.2079
1643	Nc1ccc(Br)cc1	6.1225
1644	S=C=Nc1ccc(Br)cc1	5.9915
1645	CCCCc1ccc(C(=O)c2ccccc2F)cc1	6.6846
1646	CCCCN1CCOCC1	5.823
1647	CCCCc1ccc(O)cc1O	6.2146
1648	O=C1CCCO1	7.3395
1649	COc1cc(NC(=O)CC(C)=O)c(OC)cc1Cl	6.7452
1650	Nc1c([N+](=O)[O-])cc(Cl)cc1[N+](=O)[O-]	5.9915
1651	Cc1cc(Cl)ccc1N	6.9641
1652	Cc1cc(Cl)ccc1O	7.0817
1653	Nc1ccc(Cl)cc1[N+](=O)[O-]	5.9915
1654	O=C=Nc1ccc(Cl)c(C(F)(F)F)c1	6.2146
1655	Cc1cc(O)cc(C)c1Cl	8.2506
1656	Cn1c(=O)sc2cccc(Cl)c21	7.5704
1657	Cc1cc(O)ccc1Cl	8.5427
1658	Nc1ccc(Cl)c([N+](=O)[O-])c1	5.9915
1659	Nc1ccc(Cl)cc1	5.7366
1660	Clc1ccc(C(Cl)Cl)cc1	7.6305
1661	O=Cc1ccc(Cl)cc1	7.362
1662	O=S(=O)(O)c1ccc(Cl)cc1	6.2146
1663	O=S(O)c1ccc(Cl)cc1	6.2146
1664	O=C(O)c1ccc(Cl)cc1	7.0648
1665	Clc1ccc(C(Cl)(Cl)Cl)cc1	6.42
1666	O=C(Cl)c1ccc(Cl)cc1	8.0709
1667	O=C(Cl)CCCCl	7.2079
1668	O=CNc1ccc(Cl)cc1	6.6201
1669	O=C(O)CNC(=O)c1ccc(Cl)cc1	7.7098
1670	O=C1OC(=O)c2ccc(Cl)c3cccc1c23	8.149
1671	Oc1ccc(Cl)cc1	6.8957
1672	O=C(O)COc1ccc(Cl)cc1	6.7452
1673	O=C=Nc1ccc(Cl)cc1	4.9273
1674	CSc1ccc(Cl)cc1	5.9915
1675	CS(=O)(=O)c1ccc(Cl)cc1	5.9915
1676	CS(=O)c1ccc(Cl)cc1	6.1377
1677	O=S(=O)(c1ccccc1)c1ccc(Cl)cc1	7.2442
1678	N#CCc1ccc(Cl)cc1	3.912
1679	Oc1ccc(Cl)c(O)c1	5.9108
1680	Cc1ccc(Cl)cc1	7.7289
1681	CC(C)(c1ccccc1)c1ccc(O)cc1	7.4787
1682	O=C1C(Cl)=C(Cl)C(=O)C1=C(Cl)Cl	7.7407
1683	Cc1c(N(C)C)c(=O)n(-c2ccccc2)n1C	5.6525
1684	C=Cc1ccc(OC(C)=O)cc1	7.3152
1685	CCOc1ccc(N)cc1	6.2916
1686	CCC1=CSC(S)N1	3.5553
1687	CCc1ccc(C)cc1	8.4867
1688	Nc1ccc(F)c([N+](=O)[O-])c1	7.0031
1689	Nc1ccc(F)cc1	6.0331
1690	CN1CN(CC(=O)O)CSC1=S	6.9078
1691	CCN(CC)C(=O)c1cc(=O)c2ccccc2o1	8.294
1692	O=C1CCOc2ccccc21	7.8812
1693	CCCC(=O)CCC	8.2242
1694	CCCC(=O)C(CC)Cc1ccccc1	8.3894
1695	CCCCCCCc1cc(C)c(O)c(C)c1	7.3778
1696	CCCCCCc1ccc(O)cc1O	6.3099
1697	Cc1cc(=O)cc(-c2ccccc2)o1	6.4378
1698	CCCNC(=O)Cc1cnc2cccc(C)n2c1=O	5.5215
1699	CCCc1c(OCc2cccn3c(=O)c(CC(=O)O)cnc23)ccc(C(C)=O)c1O	8.294
1700	CCCNC(=O)c1cnc2ccccn2c1=O	5.5215
1701	CCCCCNC(=O)c1cnc2cccc(C)n2c1=O	5.5215
1702	Cc1cccc2ncc(C(=O)Nc3ccccc3)c(=O)n12	5.5215
1703	CCCNC(=O)c1cnc2cccc(C)n2c1=O	5.5215
1704	Cc1cccc2ncc(C(=O)NC34CC5CC(CC(C5)C3)C4)c(=O)n12	5.5215
1705	Cc1cccc2ncc(C(=O)NC(C)C)c(=O)n12	5.5215
1706	CCCCCCCCNC(=O)c1cnc2cccc(C)n2c1=O	5.5215
1707	CCCNC(=O)c1cnc2ccc(C)cn2c1=O	5.5215
1708	CCCNC(=O)c1cnc2cc(C)ccn2c1=O	5.5215
1709	CCCNC(=O)c1cnc2c(C)cccn2c1=O	5.5215
1710	Cc1cccc2ncc(C(=O)NC(C)(C)C)c(=O)n12	5.5215
1711	CCC(C)(C)NC(=O)c1cnc2cccc(C)n2c1=O	5.5215
1712	Cc1cccc2ncc(C(=O)NCC(C)(C)C)c(=O)n12	5.5215
1713	Cc1cccc2ncc(C(=O)Nc3ccc(Cl)cc3)c(=O)n12	5.5215
1714	Cc1cccc2ncc(C(=O)Nc3ccc(F)cc3)c(=O)n12	5.5215
1715	CNC(=O)c1cnc2cccc(C)n2c1=O	5.5215
1716	CCCCNC(=O)c1cnc2cccc(C)n2c1=O	5.5215
1717	Cc1cccc2ncc(C(=O)NC3CCCCCC3)c(=O)n12	5.5215
1718	Cc1cccc2ncc(C(=O)NC3CCCCC3)c(=O)n12	5.5215
1719	Cc1cccc2ncc(C(=O)NC3CCCC3)c(=O)n12	5.5215
1720	Cc1ccc2ncc(C(=O)NC3CCCC3)c(=O)n2c1	5.5215
1721	Cc1ccn2c(=O)c(C(=O)NC3CCCC3)cnc2c1	5.5215
1722	Cc1cccn2c(=O)c(C(=O)NC3CCCC3)cnc12	5.5215
1723	Cc1cccc2ncc(C(=O)NC3CC3)c(=O)n12	5.5215
1724	CCCCCCCNC(=O)c1cnc2cccc(C)n2c1=O	5.5215
1725	CCCCCCNC(=O)c1cnc2cccc(C)n2c1=O	5.5215
1726	CCCc1c(OCc2cccn3c(=O)c(CCC(=O)O)cnc23)ccc(C(C)=O)c1O	8.294
1727	CC1CCC=C2N(C)C=C(C(N)=O)C(=O)N21	6.6201
1728	CC1(C)CC(O)CC(C)(C)N1[O]	7.0519
1729	CCOC(=O)C1=C(O)c2ccccc2S(=O)(=O)N1C	8.4764
1730	COc1cc(C=O)ccc1O	7.3652
1731	O=C(O)c1ccc(O)cc1	9.2103
1732	O=C(c1ccccc1)c1ccc(O)cc1	9.3998
1733	CNC(=O)Oc1ccc(O)c2ccccc12	7.0817
1734	O=C(O)Cc1ccccc1Nc1c(Cl)cc(O)cc1Cl	5.247
1735	CS(=O)(=O)c1ccc(O)cc1	8.0583
1736	O=C1CNC(=S)N1	6.0403
1737	C=C(C)C1CC=C(CO)CC1	7.6497
1738	CC(C)c1ccc(C=O)cc1	7.2371
1739	CC(C)c1ccc(C#N)cc1	8.2687
1740	CC(=O)OCc1ccc(C(C)C)cc1	7.2793
1741	CC(C)c1ccc(CO)cc1	6.9276
1742	CC(C)c1ccc(-c2ccccc2)cc1	9.0478
1743	CC(C)C1CCC(O)CC1	7.9194
1744	CC(C)c1ccc(CC=O)cc1	8.3187
1745	COc1ccc(N)c([N+](=O)[O-])c1	9.5539
1746	COc1ccc(C(=O)c2cccc(C)c2)cc1C	8.294
1747	COc1ccc(C(C)=O)cc1	7.4501
1748	COc1ccc(N)cc1	7.2442
1749	COc1ccc(C=O)cc1	7.3199
1750	COc1ccc(O)cc1	7.3778
1751	CC1=CCC(O)(C(C)C)CC1	7.1701
1752	CC(C)=CC1CC(C)CCO1	8.3664
1753	Cc1ccc(O)c([N+](=O)[O-])c1	8.1197
1754	CC(C)CC(C)O	7.8594
1755	CC(=O)CC(C)C	7.6401
1756	Cc1ccc(N)cc1[N+](=O)[O-]	8.8335
1757	Cc1ccc(N)cc1	6.4862
1758	Cc1ccc(C=O)cc1	7.3778
1759	Cc1ccc(S(=O)(=O)[O-])cc1	5.9915
1760	Cc1ccc(C#N)cc1	8.2428
1761	Cc1ccc(CO)cc1	8.2687
1762	CC1CCC(CO)CC1	6.7845
1763	Cc1c[nH]cn1	6.6214
1764	CN1CCOCC1	7.9865
1765	C[N+]1([O-])CCOCC1	9.1901
1766	Cc1ncoc1C#N	6.5999
1767	CC(=O)C=C(C)C	5.7038
1768	CCCCCCCC(=O)Oc1ccc(C)cc1	7.3778
1769	Cc1cn[nH]c1	6.2804
1770	Cc1ccnc(N)c1	5.2983
1771	Cc1ccncc1	6.0868
1772	C=Cc1ccc(C)cc1	7.7209
1773	Cc1ccc(S(C)(=O)=O)cc1[N+](=O)[O-]	6.8384
1774	Cc1cc(=O)oc2cc(O)ccc12	8.2558
1775	O=C(CN1CCOCC1)NN=Cc1ccc([N+](=O)[O-])o1	6.0403
1776	CN1C(=O)CN=C(c2ccccc2F)c2c1ccc(NC(=O)N1CCOCC1)c2Cl	7.1309
1777	NCCCN1CCOCC1	8.1775
1778	Nc1ccc([N+](=O)[O-])cc1N	6.5236
1779	Nc1ccc([N+](=O)[O-])c(N)c1	8.4118
1780	Cc1cc(O)ccc1[N+](=O)[O-]	7.0901
1781	Nc1ccc([N+](=O)[O-])cc1	6.6201
1782	O=Cc1ccc([N+](=O)[O-])cc1	8.4553
1783	NC(=O)c1ccc([N+](=O)[O-])cc1	6.1654
1784	O=C(O)c1ccc([N+](=O)[O-])cc1	7.5807
1785	O=C(Cl)c1ccc([N+](=O)[O-])cc1	8.6305
1786	O=[N+]([O-])c1ccc(CCl)cc1	7.5005
1787	O=[N+]([O-])c1ccc(-c2ccccc2)cc1	7.7098
1788	O=[N+]([O-])c1ccc(Nc2ccccc2)cc1	8.9797
1789	O=[N+]([O-])c1ccc(O)cc1	5.7137
1790	O=[N+]([O-])c1cc[n+]([O-])cc1	4.6728
1791	CN(N=O)c1ccncc1	5.2983
1792	Cc1ccc([N+](=O)[O-])cc1	8.4553
1793	CCCCCCCCCc1ccc(O)cc1	7.3902
1794	CCCCC(O)C(N)CC	6.3099
1795	CCCCC1CCC(=O)O1	8.3894
1796	CC(=O)CCC(=O)O	7.5229
1797	CC1CCC(=O)O1	9.0825
1798	C=CCCC=O	6.4297
1799	C=CCCC(=O)O	6.1527
1800	C=CCCC(=O)Cl	6.1527
1801	O=S1(=O)CCN(c2ccccc2)CC1	6.6846
1802	Cc1ccc(-c2ccccc2)cc1	7.8517
1803	CC=Cc1ccc(OC)c(OC)c1	7.824
1804	CCCc1ccc(OC)cc1	8.3894
1805	CCCc1ccc(O)cc1	6.2146
1806	Nc1ncnc2nccnc12	6.6134
1807	CC(C)(CO)c1cc(Cl)nnc1Cl	6.2146
1808	O=Cc1ccncc1	7.7643
1809	CC(C)(C)c1ccc(C=O)cc1	6.6846
1810	CC(C)(C)c1ccc(C(=O)O)cc1	6.1591
1811	CC(C)(C)c1ccc(O)c(O)c1	6.7032
1812	CC(C)(C)C1CCC(O)CC1	8.3428
1813	CC(C)(C)C1CCC(=O)CC1	5.7038
1814	CC(=O)OC1CCC(C(C)(C)C)CC1	5.7038
1815	CC(C)(C)c1ccc(O)cc1	8.5867
1816	Cc1ccc(C(C)(C)C)cc1	7.3492
1817	NN1C(=O)CSC1=S	0.7885
1818	Cc1ccc(S(N)(=O)=O)cc1	7.7536
1819	CC(=O)Oc1ccc(C)cc1	7.5496
1820	C1CC2OC2CC1C1CO1	7.9374
1821	C=CC1CC=CCC1	8.7483
1822	C=Cc1ccncc1	4.6052
1823	O=Cc1ccc(CO)o1	7.824
1824	CC1(C)NC(=O)NC1=O	8.9619
1825	O=C1NC(=O)C(c2ccccc2)(c2ccccc2)N1	7.3994
1826	S=C1SSC2=NCCN12	5.9402
1827	C#CCCC#CC#CCCCCO	5.5215
1828	Cc1ccc2c(Cl)cc(Cl)c(O)c2n1	6.4922
1829	CCCCOCCOCCOCCOCCOCCCC	8.7796
1830	CC(=O)c1ccc(O)c(C(N)=O)c1	7.4384
1831	Nc1c(I)c(C(=O)O)c(I)c(C(=O)O)c1I	8.6995
1832	Nc1ccc(O)c(C(=O)O)c1	7.9374
1833	NS(=O)(=O)c1ccc2nc(C(F)(F)F)[nH]c2c1	3.0445
1834	O=c1[nH]c(=O)n(C2CC(O)C(CO)O2)cc1Br	9.036
1835	Nc1cc(Cl)ccc1Oc1ccc(Cl)cc1Cl	7.735
1836	Cc1ccc(Cl)cc1N	6.1399
1837	Cc1nc2cc(Cl)ccc2o1	6.9078
1838	O=C(Nc1ccc(Cl)cc1)c1cc(Cl)cc(-c2ccc(Cl)cc2)c1O	7.9409
1839	Cc1[nH]nc(Cl)c1[N+](=O)[O-]	5.8579
1840	Cc1cc(Cl)cc(O)c1O	7.2528
1841	O=[N+]([O-])c1ccc(Cl)cc1C(F)(F)F	6.3172
1842	CCC1(C)C(=O)N(CC2CO2)C(=O)N1CC1CO1	5.5215
1843	CCc1cnc(C(=O)O)c(C(=O)O)c1	8.1176
1844	CCc1ccc(C)nc1	7.4955
1845	CCc1ccc(CCO)nc1	8.364
1846	CCSC(C)C1(CC)C(=O)NC(=S)NC1=O	6.649
1847	CC=C1CC2C=CC1C2	8.5313
1848	O=c1[nH]cc(F)c(=O)[nH]1	5.4381
1849	CC1C(C)(C)C2CCc3cncnc3C2C1(C)C	5.7038
1850	CC1C(C)(C)C2=C(c3ncncc3CC2)C1(C)C	6.2146
1851	O=C(O)Cc1ccc2c(c1)C(=O)c1ccccc1CN2	6.697
1852	CN1Cc2ccccc2C(=O)c2cc(CC(=O)O)ccc21	6.7334
1853	CCCCCCCC1CCC(=O)O1	9.8255
1854	C=CC#CC(C)(C)O	6.3969
1855	O=C(O)c1cc(O)cc(C(=O)O)c1	9.3255
1856	O=C(O)Cc1cc(O)ccc1Nc1c(Cl)cccc1Cl	7.2654
1857	O=C(O)c1cc(O)ccc1Nc1cccc(C(F)(F)F)c1	6.9078
1858	CCC(C)(CC)c1cc(N)on1	4.9698
1859	COC1CC2CC1C1CC(C=O)CC21	7.9374
1860	COc1c2ccoc2cc2oc(=O)ccc12	10.309
1861	Cc1ccc2[nH]nnc2c1	7.3778
1862	CC1=NN(c2ccc(C)cc2)C(=O)C1	8.916
1863	CC(=O)CCC(C)C	8.0709
1864	CCC(=O)CC(C)CC	8.1605
1865	CCC(CC(C)CC)=NO	8.2428
1866	Cc1ccc(N)nc1	5.2983
1867	CCC(C)=CCCC(C)=O	8.1803
1868	CC1(C)CC(=O)CC(C)(C#N)C1	5.1818
1869	c1ccc(-c2nnn[nH]2)cc1	7.5501
1870	O=C(O)c1cc(C(=O)O)cc(S(=O)(=O)O)c1	7.8633
1871	COc1ccccc1-c1nc(C)c(C(N)=O)s1	8.9872
1872	CCCNC(=O)c1sc(-c2ccccc2OC)nc1C	8.9872
1873	CCCNC(=O)c1sc(-c2ccc(OC)c(OC)c2)nc1C	8.9872
1874	CNC(=O)c1sc(-c2ccc(OC)c(OC)c2)nc1C	8.9872
1875	COc1ccc(-c2nc(C)c(C(N)=O)s2)cc1	8.9872
1876	CCCNC(=O)c1sc(-c2ccc(OC)cc2)nc1C	8.9872
1877	Cc1cc(C)c(NC(=O)c2sc(N)nc2C)c(C)c1	6.6846
1878	CCc1cccc(CC)c1NC(=O)c1sc(N)nc1C	6.6846
1879	COc1ccc(-c2nc(C)c(C(N)=O)s2)cc1OC	8.7323
1880	Cc1nc(N2CCOCC2)sc1C(=O)Nc1ccccc1	6.6846
1881	CCCNC(=O)c1sc(-c2cc(OC)c(OC)c(OC)c2)nc1C	8.6305
1882	CNC(=O)c1sc(-c2ccccc2OC)nc1C	8.9872
1883	CNC(=O)c1sc(-c2cc(OC)c(OC)c(OC)c2)nc1C	8.5564
1884	CNC(=O)c1sc(-c2ccc(OC)cc2)nc1C	8.9872
1885	CCC(C)c1ccc2ncccc2c1	6.9276
1886	CC(=O)CCC=C(C)CCC=C(C)C	8.8247
1887	CC1(C)C2CCC(C=O)C1C2	7.7407
1888	CC1OCC2C(CO1)C1(Cl)C(Cl)=C(Cl)C2(Cl)C1(Cl)Cl	4.7875
1889	OCCC(F)(F)C(F)(F)C(F)(F)C(F)(F)C(F)(F)C(F)(F)F	7.4674
1890	C=C(C)C(=O)OCCC(F)(F)C(F)(F)C(F)(F)C(F)(F)C(F)(F)C(F)(F)F	7.824
1891	CC(=O)c1cc2c(cc1C)C(C)(C)C(C)CC2(C)C	6.8244
1892	Cc1ccccc1-n1c(C)nc2ccc(N)cc2c1=O	4.0943
1893	CC(=O)OCC1OC(n2ncc(=O)[nH]c2=O)C(OC(C)=O)C1OC(C)=O	9.3927
1894	O=c1[nH]c2ccc(Cl)cc2o1	7.0901
1895	O=C(O)c1cccc(Cl)n1	7.6871
1896	Clc1ccc2ncoc2c1	6.6737
1897	O=C(O)CCCCCCl	8.0327
1898	N#[N+]c1ccc2c(S(=O)(=O)Cl)cccc2c1[O-]	8.0709
1899	Clc1ccc(C2=NCOCS2)cc1	6.2146
1900	Cc1ccc(C2=NCOCS2)cc1	6.9078
1901	c1ccc(C2=NCOCS2)cc1	6.477
1902	CCCCCc1cc(O)c2c(c1)OC(C)(C)C1CC=C(C)CC21	6.7569
1903	CCCCCCc1ccc(C)cc1O	7.7407
1904	O=C(O)c1ccc2cc(O)ccc2c1	6.8533
1905	S=c1[nH]cnc2nc[nH]c12	5.624
1906	COc1ccc2c(c1)CCCC2=O	5.7038
1907	Cc1ccc2oc(=O)ccc2c1	7.4265
1908	CCCc1nc(C)cc(OC(=O)N(C)C)n1	5.2983
1909	Cc1cc(=O)[nH]c(=S)[nH]1	7.3132
1910	CC(=O)CCC=C(C)C	8.1605
1911	Cc1cccc(N)n1	4.6052
1912	Cc1ccc2ncccc2c1	6.6846
1913	Cc1cc(=O)[nH]c(=O)[nH]1	11.0744
1914	CCCCCCCCCCCCCc1cccc(O)c1C(=O)O	6.1759
1915	CCCc1cc(=O)[nH]c(=S)[nH]1	7.5909
1916	COCCNC(=O)c1nc2c(N)nc(-c3ccccc3)nc2nc1NCCOC	8.5192
1917	CCOc1c(OC)cccc1-c1nc(O)c2cc(C(=O)O)ccc2n1	5.9915
1918	CCOc1ccc(OC)cc1-c1nc(O)c2cc(C(=O)O)ccc2n1	6.6846
1919	Cc1c2ccccc2c(C)c2c1ccc1ccccc12	5.79
1920	Nc1ccc2c(O)cc(S(=O)(=O)O)cc2c1	9.3501
1921	CNC(=O)Oc1ccc(C)c2c1OC(C)(C)C2	2.4849
1922	CNC(=O)Oc1ccc(Cl)c2c1OC(C)(C)C2	5.5134
1923	Cc1csc2c(Cl)cccc12	5.7038
1924	CCCCC=CCCCCCCO	9.3699
1925	O=C1Cc2cccc(F)c2N1	5.7038
1926	Cc1ccc2nc3c4cccc5cccc(c(=O)n3c2c1)c54	9.158
1927	O=C(O)C(F)(F)C(F)(F)C(F)(F)C(F)(F)C(F)(F)C(F)F	7.2724
1928	CCc1nn(-c2ccc(F)cc2)c2c(=O)[nH]ccc12	5.9269
1929	COC(C)(C)CCCC(C)C(C)O	8.4096
1930	COc1ccc2ccc(=O)oc2c1CC=C(C)C	7.9742
1931	CC(C)CCCCCCO	7.9997
1932	Oc1cccc2cccnc12	7.0901
1933	CC(=O)OC1c2cccc(O)c2C(=O)c2c(O)cccc21	5.8493
1934	CNc1ncnc2c1ncn2Cc1ccccc1F	6.9078
1935	O=C1c2cccc(Sc3ccccc3)c2C(=O)c2c(Sc3ccccc3)cccc21	7.5601
1936	Nc1ccc(O)c2c1C(=O)c1c(N)c(Br)cc(O)c1C2=O	9.4335
1937	CCC=CC=CCCCCCCCCOC(C)=O	6.9078
1938	CCOC(=O)CCC1(CCC(=O)OCC)c2ccccc2-c2ccccc21	8.7275
1939	C=CCCCCCCCC(=O)N(C)C	6.3099
1940	CC1COn2c1nc1ccccc1c2=O	6.6399
1941	O=C(O)C(F)(F)C(F)(F)C(F)(F)C(F)(F)C(F)(F)C(F)(F)C(F)(F)C(F)F	6.7105
1942	CN(C)c1ncnc2c1ncn2CC1CC1	6.3456
1943	c1nc(NC2CC2)c2ncn(C3CC3)c2n1	4.8675
1944	c1nc(NC2CC2)c2ncn(CC3CC3)c2n1	5.0752
1945	FC(F)(F)c1nc(NC2CC2)c2ncn(CC3CC3)c2n1	4.6052
1946	CC=CCCCCCCCC(=O)OC	8.0064
1947	CNc1c(Cl)cc(C(=O)NC2CC2)cc1Cl	5.5683
1948	CCCCn1c(=O)n(CCC)c(=O)c2c(NC)n(C(=O)OC)nc21	7.7749
1949	O=C1CSc2ncccc2N1	6.9565
1950	FC(F)(F)c1nnc2c3ccccc3ccn12	6.4922
1951	O=C(O)COC(=O)Cc1ccccc1Nc1c(Cl)cccc1Cl	4.8675
1952	CC(=O)OC1C(=O)OC2C(OC(C)=O)C(=O)OC12	9.2103
1953	COc1ccc2c(c1)c(CC(=O)OCC(=O)O)c(C)n2C(=O)c1ccc(Cl)cc1	3.1864
1954	CC(=O)CC(c1ccc([N+](=O)[O-])cc1)c1c(O)oc2ccccc2c1=O	6.2403
1955	Cn1c(=O)c2c(ncn2CC(=O)O)n(C)c1=O	6.8024
1956	CC1=CC(=O)NS(=O)(=O)O1	8.9133
1957	CCOC(C)OCC	8.4338
1958	CC=O	7.5653
1959	CC=NN(C)C=O	5.7683
1960	CC=NO	6.6067
1961	CCC=CCCOCC=O	8.3187
1962	CC(OCCCl)OCCCl	5.7366
1963	COCCOC(C)OCCOC	8.0895
1964	CCCCOC(C)OCCCC	9.0814
1965	CC(N)=O	8.8537
1966	NC(=O)COc1ccc(Cl)cc1Cl	7.0901
1967	Cc1cc(Cl)ccc1OCC(=O)Nc1ccccc1	8.4118
1968	CNC(=O)Oc1ccc(NC(=O)C(F)(F)Cl)c(C)c1	3.8816
1969	N#CCCNC(=O)CCl	6.0162
1970	CCCOCN(C(=O)CCl)c1c(C)cccc1OCC	7.6497
1971	CCCOc1cccc(C)c1N(COCC)C(=O)CCl	7.8633
1972	CCN(CC)C(=O)CCl	6.2146
1973	Cc1cccc(OC(C)C)c1N(C)C(=O)CCl	6.8565
1974	Cc1cccc(OCCC(C)C)c1N(C)C(=O)CCl	8.1017
1975	CC(C)CNC(=O)CF	3.7377
1976	Cc1ccc(S(=O)(=O)NC(=O)NC(=O)C(Cl)(Cl)Cl)cc1	7.824
1977	CC(=O)Nc1ccc2nc(C(F)(F)F)[nH]c2c1	3.1697
1978	CC(=O)Nc1cc(Cl)c([N+](=O)[O-])cc1Cl	7.948
1979	CCCCOc1ccccc1NC(C)=O	7.9725
1980	COc1ccc(C)cc1NC(C)=O	7.7142
1981	COC(=O)c1ccc(NC(C)=O)o1	7.0901
1982	CC(=O)Nc1ccc(Cc2ccccn2)c([N+](=O)[O-])c1	5.2983
1983	CNC(=O)Oc1ccc(NC(C)=O)cc1	6.6771
1984	O=C(CF)Nc1ccc(Br)cc1	3.3673
1985	CC(C)N(C(=O)CO)c1ccc(F)cc1	6.1612
1986	CC(=O)Nc1cccc2c3c([nH]c12)CCCC3	8.2597
1987	NC(=O)Cc1nc2cc(Cl)ccc2o1	6.6201
1988	CC(=O)Nc1ccc([N+](=O)[O-])c(Cl)n1	7.5694
1989	CC(=O)Nc1cc2cccnc2c(N2CCN(CCO)CC2)n1	8.0064
1990	CCOCN(C(=O)CO)c1c(C)cccc1CC	7.7832
1991	O=C(CF)NCc1ccc(Br)cc1	6.0162
1992	CCCCN(CCCC)C(=O)CF	3.6109
1993	CC(=O)Nc1cccc(NC(C)=O)c1	9.278
1994	CC(=O)Nc1ccc2c(c1)OCO2	6.9078
1995	CC(=O)Nc1ccc2c(c1)sc1ccccc12	7.0859
1996	CC(=O)Nc1ccncc1	6.1003
1997	CCNC(=O)Cc1ccccc1	6.628
1998	C=CN(C(C)=O)c1ccccc1	7.8079
[truncated: 5,868 more rows]

## Sheet: Table S3
Table S3. Falshpoint dataset including canonical SMILES for model development.
Index No.	Canonical SMILES	flashpoint (K)
1	C=C	137.15
2	CC	138
3	CN	211
4	CO	284.26
5	C=CC#N	273.15
6	C=C=C	172
7	C#CC	185.15
8	CC#N	275.15
9	N#CN	274.35
10	C=CC	165.15
11	C1CC1	178
12	C1CN1	262.05
13	CC=O	246.15
14	CCC	169.15
15	NC=O	448.15
16	CCN	256.15
17	CNC	255
18	O=CO	342
19	COC	232.15
20	CCO	286.15
21	CNN	294.15
22	COO	274.25
23	CS	255
24	C=CC#N	273.15
25	C=CC=C	197
26	C#CCC	210.15
27	CC#CC	224.15
28	CCC#N	279.15
29	C=CC=O	254.25
30	C#CCO	306
31	N#CCN	326.25
32	CC=CC	200.35
33	C=CCC	193
34	C1CCC1	208
35	C=C(C)C	197
36	N#CCO	329.25
37	CN=C=O	255.15
38	NC1CC1	274.15
39	C=CCN	245.15
40	CC1CN1	263.15
41	C1COC1	253.15
42	C=CCO	294
43	CC(C)=O	253.15
44	CCC=O	243.15
45	CC1CO1	236
46	CC=NO	313.15
47	CC(N)=O	398.15
48	CNC=O	384.15
49	CC(C)N	256.15
50	CCCN	247
51	CN(C)C	267
52	CC(=O)O	312.15
53	O=CCO	360.15
54	COC=O	254.15
55	NNC=O	385.15
56	NC(N)=O	345.15
57	CC(C)O	284.82
58	CCCO	288.15
59	CCOC	235.95
60	CN(C)N	274.25
61	NCCN	307
62	C1CS1	283.15
63	C[N+](=O)[O-]	308.15
64	NCCO	366.45
65	O=C(O)O	442.95
66	CCOO	284.45
67	OCCO	381.35
68	CSC	237.15
69	CCS	256.15
70	C=CCl	255.35
71	OCCF	304.25
72	CCCl	230.15
73	N#CCC#N	385.37
74	C1=CCC=C1	298
75	C=CC#CC	243.15
76	C#CCC=C	229.15
77	C#CC(=C)C	221.15
78	C=C(C)C#N	285.15
79	CC=CC#N	293.15
80	C=CCC#N	294.15
81	N#CC1CC1	305.95
82	c1cc[nH]c1	306
83	C#CC(C)=O	272.15
84	c1ccoc1	238
85	c1c[nH]cn1	418.15
86	c1cn[nH]c1	355.15
87	C=C=CCC	233.15
88	C=CC=CC	231.15
89	C=CCC=C	277
90	C#CCCC	239
91	CC=C=CC	236.15
92	C=CC(=C)C	225
93	CC#CCC	243
94	C=C=C(C)C	261.15
95	C#CC(C)C	221.15
96	C1=CCCC1	273
97	c1cnoc1	282.05
98	c1cocn1	292.04
99	c1c[nH]nn1	380.15
100	c1nc[nH]n1	412.25
101	CC(C)C#N	281.15
102	CCCC#N	289.15
103	C1=CCNC1	278.95
104	C#CCNC	273.75
105	C#CC(=O)O	332.05
106	C=C(C)C=O	258.15
107	CC#CCO	324.15
108	C#CCCO	309.15
109	C#COCC	282.15
110	O=C1CCC1	283.15
111	C1=COCC1	249.15
112	C1=CCOC1	256.45
113	CC=CC=O	282.05
114	C#CC(C)O	298.75
115	C=CC(C)=O	266.15
116	CN(C)C#N	331.45
117	N#CCCN	339.65
118	C=CCCC	245.15
119	C=C(C)CC	239
120	CC=C(C)C	228
121	CC=CCC	226.15
122	C=CC(C)C	217
123	C1CCCC1	236.15
124	C=CC(N)=O	352.15
125	COCC#N	304.85
126	C=CC=NO	303.71
127	N#CCCO	402
128	C1CCNC1	275.93
129	C=CCNC	244.85
130	NC1CCC1	269
131	O=C1CCO1	343.15
132	O=CCC=O	302.05
133	C=COC=O	289.15
134	C=CC(=O)O	341.15
135	CCC1CO1	251.15
136	C1CCOC1	252.15
137	C=C(C)OC	244.15
138	C=C(C)CO	306.15
139	CC1(C)CO1	273.75
140	C=CCOC	250.15
141	CC1OC1C	251.45
142	OC1CCC1	294.15
143	CC=CCO	310.15
144	CC(C)C=O	249.15
145	CCC(C)=O	282.15
146	C=CC(C)O	289.85
147	C=CCCO	305.35
148	C=CC(C)O	293
149	CCCC=O	266.45
150	C=COCC	255.15
151	CCC(C)C	222.15
152	CC(C)(C)C	208
153	CCCCC	224.15
154	C=C[N+](=O)[O-]	296.35
155	CCC(N)=O	358.05
156	CC(C)=NO	318.35
157	CNC(C)=O	381.15
158	CN(C)C=O	331
159	CNC(=N)N	331.25
160	CSC#N	311.15
161	C=C(C)C=O	258
162	CN=C=S	305.35
163	CC(C)(C)N	264.15
164	CCC(C)N	254.15
165	CCN(C)C	237.15
166	CCC(C)N	254.15
167	CCCCN	272.15
168	CCNCC	250.15
169	CC(C)CN	264.15
170	CNC(C)C	242
171	O=CC(=O)O	377.05
172	CC(=O)CO	329.15
173	OCC1CO1	344.15
174	C1COCO1	275
175	CCOC=O	253.15
176	COC(C)=O	263.15
177	CCC(=O)O	324.15
178	CN(C)N=O	334.15
179	CNC(N)=O	296.25
180	CC(=O)NN	375.75
181	CN=[N+](C)[O-]	282.55
182	CCOCC	228.15
183	CCCCO	308.15
184	CC(C)CO	300.93
185	CCC(C)O	297.15
186	CC(C)(C)O	284.15
187	CCCOC	253.15
188	NCCCN	322.05
189	CNCCN	314.25
190	CC(N)CN	306
191	C=CCS	291.15
192	CC1CS1	283.15
193	C#CCCl	292.05
194	NCC(=O)O	372.67
195	CCON=O	288.15
196	CC(=O)NO	400.75
197	COC(N)=O	378.35
198	CC[N+](=O)[O-]	301.15
199	CC(O)CN	347.05
200	COCCN	282.55
201	CC(O)CN	350.35
202	CNCCO	347.05
203	NCCCO	352.15
204	CC(N)=S	294.55
205	N#CCCl	320.95
206	O=C(O)CO	401.85
207	CC(=O)OO	314.15
208	CN[N+](=O)[O-]	320.75
209	CCC(=O)F	276.35
210	FCC1CO1	277.15
211	COCCO	319.25
212	OCCCO	352.55
213	CCCOO	297.45
214	CC(O)CO	380
215	COCOC	255
216	NNCCO	347.05
217	CC(=O)S	284.25
218	CC(C)(C)F	260.95
219	NC(N)=S	339.95
220	CCSC	258.15
221	CC(C)S	239.15
222	CCCS	252.55
223	C=C(C)Cl	239.15
224	C=CCCl	241.15
225	NC(=O)CF	383.55
226	N#CC=CC#N	355.75
227	OCCCF	311.65
228	CC#CC#CC	285.45
229	c1ccccc1	262.15
230	CS(C)=O	358.15
231	OCCS	346
232	CC(=O)Cl	277.15
233	CCCCl	255
234	CC(C)Cl	241
235	C=CC=CC#N	312.25
236	c1ccncc1	293.15
237	NC(=O)Cl	308.75
238	CP(O)O	343.35
239	c1ccnnc1	358.15
240	c1cnccn1	328.15
241	N#CCCC#N	414.25
242	c1cncnc1	304
243	C1=CCC=CC1	267.15
244	C1=CCCC=C1	299
245	CC1=CC=CC1	299
246	COCCl	288.15
247	OCCCl	333.15
248	c1ncncn1	304.25
249	Cn1cccc1	289.15
250	C=CCCC#N	319.35
251	Cc1ccc[nH]1	320.35
252	N#CC1CCC1	317.45
253	CC=CCC#N	301.65
254	Cc1cc[nH]c1	320.35
255	OCC(F)F	273.55
256	Cc1ccoc1	251.15
257	O=C1C=CCC1	315.15
258	C#CC=CCO	337.35
259	Cc1ccco1	251.15
260	Cn1ccnc1	365.15
261	Cc1c[nH]cn1	414.75
262	Cc1cc[nH]n1	366.15
263	Cc1ncc[nH]1	418.05
264	Cn1cccn1	308.15
265	Cc1cn[nH]c1	369.25
266	C#CCCCC	252.15
267	C#CC(C)(C)C	239.15
268	C=C1CCCC1	255.15
269	CC=CC=CC	259.25
270	CC1=CCCC1	349.15
271	C=C=CCCC	253.15
272	C=CC=CCC	254.15
273	C=CCC=CC	252.15
274	C=CCCC=C	246
275	C=C(C)C(=C)C	251
276	CC=CC=CC	266.15
277	CC#CCCC	262
278	C=C(C)C=CC	253.15
279	CCC#CCC	256.15
280	C=CC(C)=CC	245
281	C=CC(C)C=C	235.15
282	C=CC=C(C)C	239.15
283	C1=CCCCC1	253
284	Cc1cocn1	293.65
285	C=CCN=C=O	316.15
286	Cc1ccno1	303.15
287	C=CC(O)C#N	345.05
288	CCCCC#N	313.75
289	CC(C)CC#N	301.45
290	C#CC(C)(C)N	275.15
291	CCC(C)C#N	297.55
292	C1=CCNCC1	289.25
293	[C-]#[N+]CCCC	293.75
294	CC(C)(C)C#N	277
295	O=C1C=CCO1	374.25
296	CC#CC(=O)O	364.05
297	C=C1CC(=O)O1	371.05
298	C#CC(=O)OC	283.15
299	O=CC=CC=O	339.35
300	N#CNC(=N)N	365.95
301	Nn1cnnc1	388.85
302	CC(C)=CC=O	307.05
303	C#CC(C)(C)O	298.15
304	C1CC2OC2C1	283.15
305	CC=C(C)C=O	291.45
306	CC=CC(C)=O	343.15
307	CC(=O)C1CC1	294.25
308	C=C(C)C(C)=O	284.15
309	C=C(C=O)CC	274.15
310	C=CC(O)C=C	303.15
311	CCC=CC=O	292.15
312	C=CC(=O)CC	263.15
313	C#CCC(C)O	310.35
314	OC1C=CCC1	328.25
315	C#CC(O)CC	302.15
316	C#CCCCO	329.15
317	CCC#CCO	331.15
318	CC#CCCO	327.55
319	O=C1CCCC1	303.71
320	CC1=CCCO1	261
321	C1=COCCC1	255.15
322	CNCCC#N	336.25
323	CC1=NCCN1	347.35
324	CN(C)CC#N	306.15
325	c1ccsc1	272.05
326	C=CC(C)(C)C	245.15
327	C=C(C)C(C)C	255.15
328	CCC=C(C)C	246.15
329	CC(C)=C(C)C	257.15
330	C=CCCCC	247
331	C=C(CC)CC	247
332	CC=CCCC	252
333	C=C(C)CCC	247
334	C=CC(C)CC	245
335	CC=C(C)CC	267
336	C=CCC(C)C	242
337	CC=CC(C)C	238.15
338	C1CCCCC1	253.15
339	CC1CCCC1	263
340	ClCCl	312.65
341	N#CCC(=O)O	380.95
342	C=C(C)C(N)=O	354.85
343	COCCC#N	334.25
344	CCCN=C=O	272.15
345	CC1=NCCO1	293.15
346	C=CC(=O)NC	376.75
347	NC(=O)C1CC1	377.25
348	CC(C)(O)C#N	346.15
349	O=C1CCCN1	402.15
350	c1cscn1	299.15
351	CN1CCCC1	251.45
352	NC1CCCC1	285
353	C1CCNCC1	289.15
354	C=C(C)C(=O)O	347.32
355	O=C1CCCO1	354.05
356	C1OC1C1CO1	313.15
357	CC(=O)C(C)=O	278.65
358	CC=CC(=O)O	354.75
359	C1=COCCO1	298.75
360	C1OC1C1CO1	318.75
361	C=CCC(=O)O	341.35
362	O=C(O)C1CC1	344.85
363	C=CCOC=O	279.65
364	CC=CC(=O)O	361.15
365	C=CC(=O)OC	279.82
366	OCC#CCO	408.71
367	CC1CC(=O)O1	307.25
368	C=COC(C)=O	265
369	O=C1NCCN1	475.67
370	C=CN(C)N=O	318.65
371	CCC(C)C=O	277.15
372	OC1CCCC1	324.15
373	CC1CCCO1	262.15
374	CCCC(C)=O	280.35
375	CCCCC=O	285.35
376	C1CCOCC1	258.15
377	CC(C)=CCO	316.15
378	CC(C)CC=O	268.15
379	C=CC(O)CC	298.15
380	C=CCC(C)O	298.75
381	CC(C)(C)C=O	258.15
382	C=C(C)CCO	313.25
383	C=COCCC	247.05
384	CC(O)C1CC1	303.75
385	C=CCCCO	316.15
386	CC=CC(C)O	300.95
387	CCC=CCO	323.75
388	CCC=CCO	323.75
389	C=C(C)C(C)O	302.75
390	CCC(=O)CC	285.95
391	C=CC(C)(C)O	285.95
392	CC=COCC	254.25
393	CC1CCCO1	262.05
394	CC(=O)C(C)C	279
395	C=COC(C)C	241.15
396	C1CNCCN1	322.85
397	C1=CCSC1	296.65
398	CCC(C)(C)C	225.15
399	CCC(C)CC	267.15
400	CCCC(C)C	241.15
401	CC(C)C(C)C	244.15
402	CCCCCC	250.15
403	NC(=O)C1CO1	513.95
404	CCC(C)=NO	333.15
405	CCCC=NO	331.15
406	C1COCCN1	308.75
407	CCCC(N)=O	361.05
408	CC(C)C(N)=O	360.85
409	CCNC(C)=O	378.55
410	CCC(=O)NC	378.55
411	CC(=O)N(C)C	336
412	CCN=C=S	305.35
413	CCSC#N	295.15
414	CCC(C)CN	276.45
415	CCCCNC	274.85
416	CC(C)C(C)N	245.35
417	CCC(N)CC	275.35
418	CCN(C)CC	275.35
419	CC(C)N(C)C	264.15
420	CC(C)CCN	291.45
421	CCCCCN	277.55
422	CCNC(C)C	289.25
423	CCC(C)CN	257.15
424	CCCC(C)N	266.45
425	C=C(Cl)C#N	279.85
426	O=C1OCCO1	436.65
427	CC(=O)C(=O)O	327.45
428	NC(=O)C(N)=O	385.85
429	ON=CC=NO	329.35
430	O=CNNC=O	354.75
431	CC(C)C(=O)O	331.35
432	CC(O)CC=O	331.85
433	CCCC(=O)O	342.15
434	CCOC(C)=O	269.15
435	OC1CCOC1	354.25
436	C=CC(O)CO	362.45
437	CC1OCCO1	271.15
438	CC(=O)C(C)O	322.85
439	C=COCCO	323.15
440	COCC1CO1	281.25
441	CCC(=O)CO	333.15
442	OCC=CCO	401.15
443	C1COCCO1	285.35
444	CCC(=O)OC	271.15
445	C1COCOC1	274.15
446	COCC(C)=O	293.15
447	OCC=CCO	401.15
448	CC(C)OC=O	267.15
449	CCCOC=O	270.15
450	CNC(=O)NC	397.45
451	CCN(C)N=O	320.35
452	CCCCCO	322.05
453	CC(C)(C)CO	310.15
454	CC(C)CCO	318.75
455	CCC(C)CO	316.15
456	CCC(O)CC	313.15
457	COC(C)(C)C	245.15
458	CCCC(C)O	307.15
459	CCC(C)OC	243.15
460	CCC(C)(C)O	294.25
461	CCCCOC	263
462	CCC(C)OC	243
463	CCC(C)CO	316
464	CCCC(C)O	313
465	CC(C)C(C)O	312
466	CCCOCC	253
467	CCC(C)OC	243
468	CN(C)CCN	297.05
469	CCNCCN	283.15
470	CC(N)CCN	309.65
471	CCN(N)CC	295.95
472	NCCCCN	324.85
473	CNCCCN	313.15
474	C=CCSC	291.45
475	C1CCSC1	285.95
476	C=C=CCCl	273.65
477	C=CC(=C)Cl	253
478	CCOC(N)=O	370.35
479	CCC[N+](=O)[O-]	308.75
480	CC(C)[N+](=O)[O-]	297.15
481	CCC(N)CO	355.35
482	CN(C)CCO	313.75
483	CC(C)(N)CO	340.35
484	CCN(O)CC	318.15
485	COCCCN	295.95
486	NCCCCO	380.95
487	CCC(O)CN	334.15
488	CCNCCO	351.15
489	CCOCCN	290.85
490	COCC(C)N	281.15
491	C1CSCN1	329.25
492	N#CCCCl	348.75
493	CC(Cl)C#N	306.45
494	CC(O)C(=O)O	383.09
495	O=C(CO)CO	370.45
496	COC(=O)OC	291.15
497	COCC(=O)O	394.15
498	CC(O)C(=O)O	383.05
499	COC(=O)CO	340.35
500	C1OCOCO1	318.15
501	COC(=O)NN	359.25
502	CC(C)(C)OO	308.15
503	CC(O)CCO	394.25
504	COCC(C)O	344.95
505	COCCOC	273.15
506	CCOCCO	317.15
507	COC(C)OC	256.15
508	CC(C)(O)CO	346.85
509	CCC(O)CO	366.45
510	COC(C)CO	315.05
511	COCCCO	325.95
512	CC(CO)CO	375.65
513	CCCCOO	311.05
514	CC(O)CCO	394
515	OCCCCO	394.25
516	COCC(C)O	311
517	COCC(C)O	305.15
518	CC(O)C(C)O	358
519	NCC(O)CN	370.05
520	CNC(N)=S	312.25
521	CCSCC	263.15
522	CCCSC	273.15
523	CC(C)(C)S	249.15
524	CCCCS	274.85
525	CCC(C)S	250
526	CC(C)CS	264.15
527	C=CC(=O)Cl	289.25
528	C=C(C)CCl	260.35
529	CC=C(C)Cl	254.15
530	CC=CCCl	378.55
531	CC=CCCl	261.15
532	ClCC1CC1	271.45
533	CCO[N+](=O)[O-]	283.15
534	NC(CO)CO	388.25
535	NNC(N)=S	353.15
536	COC(=O)CF	290.75
537	OCC(O)CO	433.15
538	O=C(O)CS	372.95
539	Cc1ccccc1	283.15
540	C1=CC2C=CC1C2	262.05
541	C1=CC=CCC=C1	299.85
542	C#CCCCC#C	282
543	CC(=O)CCl	300.95
544	ClCC1CO1	307.05
545	O=CCCCl	299.55
546	CCC(=O)Cl	285
547	CC(C)(C)Cl	291.45
548	CC(C)CCl	294
549	CCCCCl	267
550	CCC(C)Cl	258.15
551	N#Cc1ccco1	308.15
552	Nc1ccccc1	349.15
553	Cc1ccncc1	313.15
554	Cc1cccnc1	309.26
555	Cc1ccccn1	299.26
556	NC(=O)CCl	381.75
557	CP(C)(=O)O	410.85
558	C=Cc1ccco1	278.65
559	Oc1ccccc1	352.15
560	Cc1cnccn1	323.15
561	Nc1cccnc1	397.15
562	Nc1ccncc1	429.15
563	Cc1cccnn1	360.95
564	Cc1cncnc1	316.41
565	Cc1ccncn1	313.15
566	CC(C)(C#N)C#N	350.95
567	Cc1ncccn1	293.45
568	CS(C)(=O)=O	416.15
569	CC1=CCCC=C1	276.25
570	C=CC#CCCC	281.35
571	C1=CCCCC=C1	284.25
572	C1=CC2CCC1C2	258
573	SCCS	317.55
574	CSSC	297.55
575	O=C(O)CCl	399.15
576	COC(=O)Cl	280.95
577	CC(O)CCl	324.85
578	COCCCl	288.15
579	CCOCCl	292.15
580	CC(Cl)CO	324.85
581	OCCCCl	346
582	ClC#CCl	280.45
583	O=Cc1ccc[nH]1	379.85
584	O=c1cccc[nH]1	454.25
585	N#CCNCC#N	431.05
586	CCn1cccc1	298.65
587	Cc1c[nH]c(C)c1	329.75
588	CCc1ccc[nH]1	335.35
589	Cc1ccc(C)[nH]1	327.15
590	O=[N+]([O-])CCl	297.85
591	O=C(O)C(F)F	351.15
592	C=CC(F)(F)F	191.15
593	O=Cc1ccco1	331.45
594	O=c1ccocc1	374.25
595	O=c1cccco1	362.35
596	O=Cc1ccoc1	321.45
597	Fc1ccccc1	258.15
598	CS(=O)(=O)O	462.15
599	CC=CC=CC=O	341.15
600	Cc1ccc(C)o1	271.45
601	CC1=CCCC1=O	326.25
602	C#CCCC(C)=O	315.85
603	CC1=CC(=O)CC1	326.25
604	CCc1ccco1	274.15
605	Cc1coc(C)c1	273.95
606	O=C1C=CCCC1	328.85
607	O=C1CC=CCC1	319.95
608	Cc1cc(C)[nH]n1	363.65
609	Cc1cnc(C)[nH]1	415.45
610	CN(C)C=CC#N	405.05
611	CCn1ccnc1	352.05
612	Cc1nccn1C	365.15
613	CC1C=CCCC1	270.15
614	CC#CCCCC	281.15
615	CC1=CCCCC1	269.25
616	C#CCCCCC	271.15
617	C=C(C)C=C(C)C	283.15
618	C=C1CCCCC1	266.45
619	CC=C1CCCC1	275.85
620	C=C=CCCCC	275.35
621	CCC#CCCC	278.45
622	C=CCCCC=C	263
623	CSCCl	290.35
624	SCCCl	304.05
625	C=C(Cl)Cl	248.15
626	ClC=CCl	279.25
627	O=C1C=CC(=O)N1	409.75
628	Fc1cccnc1	286.48
629	Fc1ccccn1	301.48
630	Fc1ccncc1	295.95
631	Cc1cc(C)on1	304.25
632	NCc1ccco1	319.85
633	Cc1coc(C)n1	307.65
634	Cc1cnc(C)o1	303.15
635	C=CCNCC=C	288.75
636	CC(C)CCC#N	318.75
637	CCCCCC#N	316.15
638	CP(=O)(O)F	318.75
639	O=C1C=CC(=O)O1	376.45
640	OCc1ccco1	338.15
641	CS(=O)(=O)F	301.65
642	CC1=CCC(=O)O1	341.15
643	C#CC(=O)OCC	296.15
644	C=COC(=O)C=C	286.65
645	OCc1ccoc1	311.45
646	COc1ccco1	283.15
647	Cc1nonc1C	308.65
648	COC(C)=NC#N	292.05
649	O=C1CCCCC1	317.15
650	CCC#CC(C)O	326.45
651	CC=CC=CCO	345.35
652	CC(=O)C=C(C)C	303.75
653	C1CCC2OC2C1	300.35
654	C=CCOCC=C	266.15
655	C#CC(O)C(C)C	315.05
656	CCCC#CCO	340.95
657	OC1CC=CCC1	326.55
658	O=CC1CCCC1	309.15
659	C=CCC(O)C=C	302.55
660	CCC#CCCO	336.45
661	CC1CCCC1=O	305.85
662	CC=CC(=O)CC	307.55
663	CCCC=CC=O	308.15
664	CCC=CCC=O	333.15
665	CC1=CCOCC1	287.45
666	C#CC(C)(O)CC	302.15
667	C=CCCC(C)=O	297.05
668	C#CCCCCO	343.15
669	C=C(C=O)CCC	302.25
670	CC(=O)C1CCC1	305.45
671	CCC=C(C)C=O	304.15
672	C1CCC2OC2C1	297
673	CN(C)CCC#N	335.15
674	CCC(C)(N)C#N	343.85
675	CCN(C#N)CC	342
676	Cc1cccs1	280
677	Cc1ccsc1	284.15
678	C1CCCCCC1	279.25
679	CC=C(CC)CC	309.15
680	CCC1CCCC1	288.75
681	C=CCCCCC	265
682	C=C(C)C(C)(C)C	256.15
683	C=C(CC)CCC	263.15
684	C=C(C)CCCC	267
685	C=CC(CC)CC	256.15
686	C=CC(C)CCC	267.15
687	C=CCC(C)CC	258.15
688	CC1CCCCC1	269.15
689	CC(Cl)Cl	267
690	ClCCCl	286
691	NCC(F)(F)F	257.15
692	COC(=O)CC#N	315.85
693	O=C1CCC(=O)N1	433.15
694	CCOC(=O)C#N	297.55
695	Nc1n[nH]c(N)n1	544.75
696	CC1CCC(=O)N1	400.65
697	CCCCN=C=O	290.95
698	O=C1CCCCN1	406.25
699	CC(C)CN=C=O	290.25
700	CCOCCC#N	337.05
701	C=CN(C)C(C)=O	336.05
702	CC(C)=CC(N)=O	364.35
703	CN1CCCC1=O	364.15
704	C=CC(=O)N(C)C	344.85
705	CCC1=NCCO1	302
706	C=CCN=C=S	309.45
707	Cc1nccs1	302.05
708	Cc1cscn1	305.15
709	CC1CCCCN1	289.15
710	C1CCCNCC1	291.15
711	CC1CCNCC1	280.35
712	CN1CCCCC1	276.45
713	CCN1CCCC1	274.75
714	C=C(C)CNCC	280.35
715	CC1(N)CCCC1	282.35
716	NC1CCCCC1	300
717	OCC(F)(F)F	302.55
718	O=C1CCC(=O)O1	424.15
719	C=C(C)C(=O)OC	283.15
720	C=C(C)OC(C)=O	286.05
721	CC1CCC(=O)O1	348.13
722	O=CCCCC=O	339.15
723	CC(=O)CC(C)=O	316.25
724	C=CC(=O)OCC	288.71
725	CC(C)=CC(=O)O	369.15
726	CC=C(C)C(=O)O	369.05
727	C=CCCC(=O)O	362.15
728	C=CCOC(C)=O	279.85
729	CCC(=O)C(C)=O	292.85
730	CC=CC(=O)OC	277.15
731	CC1CCOC1=O	348.15
732	O=C(O)C1CCC1	356.15
733	C=CC1OCCO1	294.15
734	CC1CC1C(=O)O	360.95
735	O=C1CCCCO1	354.15
736	COC(=O)C1CC1	290.15
737	O=C1CCOCC1	336.75
738	CC1CCC(=O)O1	354
739	C=CCNC(N)=O	328.45
740	O=NN1CCCC1	356.45
741	C=CCN(C)N=O	338.95
742	CC(=O)C(C)(C)C	297.05
743	CC(=O)CC(C)C	286.45
744	OC1CCCCC1	340.93
745	CCCC(C)C=O	289.85
746	CCC=CCCO	317.55
747	CCC(C)C(C)=O	285.15
748	CCC(=O)C(C)C	283.95
749	CCCC(=O)CC	296.15
750	CCCCC(C)=O	296.15
751	C1CCCOCC1	287.35
752	C=CCCCCO	320.35
753	C=CC(C)(O)CC	299.15
754	CC=CCCCO	334.25
755	CCCC=CCO	334.85
756	CCC=CCCO	317.15
757	CC(C)CCC=O	290.95
758	CC1(C)CCCO1	277.65
759	CCCCC1CO1	294.95
760	CCC=C(C)CO	333.95
761	CC(C)(C)CC=O	283.75
762	OCC1CCCC1	335.35
763	C=CC(O)CCC	308.15
764	CCC(C)CC=O	290.95
765	CC1CCC(O)C1	328.15
766	CC1CCCC1O	320.35
767	CC=CC(C)(C)O	297.35
768	CCCCCC=O	305.15
769	CCC(C=O)CC	294.25
770	CCCC=CCO	327.15
771	CCC1OC1(C)C	277.45
772	CC1(O)CCCC1	313.75
773	CCC(C)C(C)=O	285
774	C=COCCCC	264
775	C=COCC(C)C	264.15
776	CN1CCNCC1	315.35
777	C1CNCCNC1	337.55
778	NN1CCCCC1	309.25
779	CCN1CN1CC	275.75
780	CC1CNCCN1	318.25
781	CC(C)CC(C)C	260.95
782	CCCCCCC	272.05
783	CC(C)C(C)(C)C	267
784	CCC(C)C(C)C	267
785	CCCCC(C)C	270
786	CCCC(C)CC	270
787	CC(=O)C(C)=NO	458.65
788	CC(=O)NC(C)=O	374.95
789	C=CC(=O)NCO	419.35
790	Nc1nncs1	371.45
791	CC(C)CC(N)=O	367.25
792	CCN(C=O)CC	333.15
793	CCCC(C)=NO	351.15
794	CCCCC(N)=O	367.45
795	CCC(=O)N(C)C	338.95
796	CC(C)(C)NC=O	368.85
797	CN1CCOCC1	297.05
798	CCCN=C=S	258.15
799	CC1=NCCS1	310.35
800	CC(C)CC(C)N	285.15
801	CCCCCCN	300.15
802	CCCCN(C)C	278.15
803	CC(C)CCCN	298.85
804	CCCNC(C)C	274.25
805	CC(C)NC(C)C	266.15
806	CCCNCCC	276.15
807	CC(N)C(C)(C)C	274.25
808	CCCCNCC	291.15
809	CC(C)(C)CCN	278.75
810	CC(C)CC(C)N	285.95
811	CC(=O)CC(=O)O	384.95
812	COC(=O)C(C)=O	312.15
813	CC1COC(=O)O1	408.45
814	CC(=O)OC(C)=O	322
815	NC(=O)N=C(N)N	420.15
816	C#Cc1ccccc1	304.15
817	CC(C)(C)C(=O)O	341.45
818	CCOC(=O)CC	285.35
819	CC(=O)OC(C)C	289.85
820	CCCOC(C)=O	285.95
821	C=CCOCCO	328.15
822	CC(=O)C(C)(C)O	315.35
823	CCC(C)C(=O)O	346.55
824	CC(C)CC(=O)O	346.55
825	CC(C)COC=O	283.15
826	COC(=O)C(C)C	277.55
827	CC(C)(C=O)CO	333.45
828	CC(=O)CCCO	366.15
829	C=COCCOC	282.45
830	CC1(C)OCCO1	274.85
831	COC(C)CC=O	299.35
832	C=CC(OC)OC	270.35
833	OCC1CCCO1	347.15
834	CCC(C)OC=O	276.65
835	CC1CCOCO1	295.35
836	CCOCC1CO1	296.65
837	CCC(C)C(=O)O	350
838	CCOCCC=O	311.15
839	CCCCOC=O	291.15
840	CCCC(=O)OC	287.15
841	CCCCC(=O)O	361.15
842	CC(C)(C)OC=O	264
843	OCC1CCCO1	343.15
844	CCN(CC)N=O	332.15
845	CNC(=O)N(C)C	367.55
846	CCCC(=O)NN	378.05
847	NN1CCOCC1	331.15
848	FC1CCCCC1	282.05
849	S=C1NCCN1	316.65
850	CCCCCCO	333.15
851	CCCOCCC	253.15
852	CC(O)C(C)(C)C	302.05
853	CCCC(C)(C)O	294.25
854	CCCC(O)CC	314.82
855	CC(C)(C)CCO	320.95
856	CC(C)CCCO	324.85
857	CCCCC(C)O	314.15
858	CCCCOCC	272.15
859	CCOC(C)(C)C	254.15
860	CCC(C)(C)CO	310.55
861	CC(C)C(C)(C)O	302.55
862	CCC(CC)CO	330
863	CCCC(C)CO	323
864	CCC(O)C(C)C	319
865	CCC(C)CCO	331
866	CCC(C)C(C)O	313
867	CCC(C)(O)CC	297.15
868	CC(C)CC(C)O	314
869	CC(C)OC(C)C	245
870	CCC(C)(C)OC	262
871	CNCCN(C)C	282.55
872	NCCCCCN	335.15
873	CNCCCNC	308
874	C1CCSCC1	294.25
875	CC1CCCS1	301.25
876	CC1CCSC1	301.25
877	SC1CCCC1	298
878	ClC1C=CCC1	281.85
879	C#CC(C)(C)Cl	277.55
880	C#CCCCCl	288
881	CN(N=O)C(N)=O	326.25
882	N#Cc1ccccc1	344.85
883	CCOC(=O)NC	330.95
884	CC(=O)NCCO	449.85
885	CCCCON=O	261.15
886	CC(C)(C)[N+](=O)[O-]	292.15
887	CC(C)C[N+](=O)[O-]	311.35
888	CN(C)CC(=O)O	332.95
889	CC(C)OC(N)=O	363.25
890	CC(C)CON=O	252.15
891	CC(C)(C)ON=O	250
892	CC(O)CN(C)C	308.15
893	CC(C)NCCO	343.45
894	NCCCCCO	338.75
895	CCCC(N)CO	368.15
896	CCOCCCN	305.95
897	CC(CO)N(C)C	305.25
898	CC(C)C(N)CO	363.15
899	CCCNCCO	351.45
900	CN(C)CCCO	309.25
901	NCCNCCN	367.59
902	CN(C)CCNN	339.05
903	C1CSCCN1	333.15
904	N#CCCCCl	358.15
905	O=C(O)CC(=O)O	475.05
906	N=C(N)N[N+](=O)[O-]	422.45
907	N#Cc1ccncc1	355.85
908	N#Cc1cccnc1	357.59
909	N#Cc1ccccn1	362.55
910	CC(=O)OCCO	350.55
911	COC(=O)C(C)O	322.15
912	CCOCC(=O)O	366.25
913	COC(=O)CCO	345.75
914	COCC(=O)OC	308.15
915	CCOC(=O)CO	334.85
916	C=Cc1ccccc1	304.26
917	C1=CC=CC=CC=C1	295
918	CC(C)OCCO	316.15
919	CCOCCCO	327.55
920	CC(C)(O)CCO	364.45
921	CCCOCCO	324.35
922	COCC(C)OC	273.75
923	CCOC(C)CO	319.05
924	COC(C)CCO	319.85
925	CCC(C)(C)OO	314.35
926	CCCC(O)CO	377.15
927	CC(O)C(C)(C)O	343.35
928	OCCCCCO	402
929	CCOCC(C)O	315.15
930	CC(C)(CO)CO	380
931	CC(O)CC(C)O	374.15
932	CCOCOCC	268
933	NCCNCCO	363.65
934	NCCOCCN	347.95
935	CCCCCCF	300.35
936	CCSC(C)=O	291.45
937	O=S1CCCC1	389.65
938	CSCCC=O	334.25
939	C1CSCCO1	328.75
940	CNC(=S)NC	473.15
941	CCC(C)CS	292.55
942	CCCSCC	292.05
943	CC(C)CCS	291.45
944	CCCCSC	293.75
945	CCC(C)(C)S	272.15
946	CCCCCS	291.45
947	CCC(C)CS	292
948	CCCC(C)S	282
949	CC(C)C(C)S	292
950	CSC(C)(C)C	270
951	C=C(C)C(=O)Cl	300.85
952	CC=CC(=O)Cl	308.15
953	CC=C(Cl)C=O	316.95
954	CC(Cl)=CC=O	312.85
955	CC(C)=CCCl	277.15
956	ClC1CCCC1	288.15
957	C=C(C)C(C)Cl	275.15
958	CC=C(C)CCl	281.95
959	NC(CO)C(=O)O	465.73
960	CC(C)O[N+](=O)[O-]	285.95
961	CCCO[N+](=O)[O-]	293.15
962	C=Cc1ccncc1	324.82
963	C=Cc1ccccn1	319.85
964	C=Cc1cccnc1	324.05
965	NCCOCCO	349.75
966	OCCNCCO	410.93
967	CC(N)(CO)CO	382.85
968	CNC(=S)NN	328.75
969	CCOC(=O)CF	303.15
970	O=Cc1ccccc1	336.15
971	N#CCC=CCC#N	419.35
972	COCOCCO	310.95
973	OCCOCCO	416.48
974	COC(OC)OC	288.75
975	CC(O)C(O)CO	474.15
976	OCCC(O)CO	440.15
977	O=C(O)CCS	373.89
978	COC(=O)CS	329.15
979	C=CS(C)(=O)=O	386.15
980	Cc1cccc(C)c1	298.15
981	C#CCCCCC#C	296.45
982	C1=CC=CCCC=C1	300.95
983	NNC(=S)NN	366.15
984	Cc1ccccc1C	305
985	Cc1ccc(C)cc1	298
986	CCc1ccccc1	288.15
987	CCSCCO	289.25
988	C1CSCS1	336.75
989	O=C(O)C=CCl	343.25
990	CC(C)C(=O)Cl	274.25
991	C=COCCCl	289.15
992	CCCC(=O)Cl	294.85
993	CC1(CCl)CO1	307.65
994	CC(=O)C(C)Cl	296.15
995	CC(C)(Cl)C=O	298.65
996	CCCCCCl	284.25
997	CCC(C)(C)Cl	276.55
998	CCCC(C)Cl	282.95
999	CC(C)(C)CCl	264.25
1000	CC(C)CCCl	289.15
1001	CCCC(C)Cl	273
1002	C=CBr	255.95
1003	O=Cc1cccnc1	357.15
1004	O=Cc1ccccn1	327.55
1005	NCc1ccccc1	333.15
1006	CNc1ccccc1	352.04
1007	CCc1ccccn1	302.55
1008	Cc1cccc(C)n1	306.45
1009	CCc1ccncc1	320.15
1010	CCc1cccnc1	322.05
1011	Cc1ccncc1C	326.15
1012	Cc1cncc(C)c1	326.15
1013	N#CC1CC=CCC1	338.95
1014	Cc1cccnc1C	318.55
1015	Cc1ccc(C)nc1	321.15
1016	Cc1ccnc(C)c1	310.35
1017	Cc1ccccc1N	358.15
1018	Cc1cccc(N)c1	359.15
1019	Cc1ccc(N)cc1	359
1020	CN(C)C(=O)Cl	341.45
1021	N#CSCCl	357.05
1022	O=C1C=CC(=O)C=C1	332.45
1023	N#CC(N)=C(N)C#N	495.85
1024	O=S1OCCO1	352.15
1025	N=C(N)S(=O)O	441.85
1026	Cc1ccccc1O	350.25
1027	OCc1ccccc1	370.65
1028	COc1ccccc1	317.6
1029	Cc1ccc(O)cc1	354.15
1030	Cc1cccc(O)c1	359.26
1031	NNc1ccccc1	388.55
1032	Nc1ccc(N)cc1	409.05
1033	Nc1cccc(N)c1	420.75
1034	Cc1cncc(C)n1	325.95
1035	N#CCCCCC#N	422.15
1036	Cc1cnc(C)cn1	337.05
1037	Cc1ccnc(N)c1	387.15
1038	Cc1cc(C)ncn1	329.15
1039	Cc1cccnc1N	383.05
1040	Cc1cccc(N)n1	376.15
1041	Cc1cnccc1N	411.55
1042	NCc1ccccn1	363.15
1043	NCc1cccnc1	373.15
1044	NCc1ccncc1	381.45
1045	CC(C#N)CCC#N	399.15
1046	CNc1ccccn1	360.95
1047	Cc1nccnc1C	327.55
1048	CCc1cnccn1	315.95
1049	Cc1ccnc(C)n1	309.85
1050	CCC(C#N)CC#N	399.55
1051	Nc1ccccc1N	383.15
1052	Cc1ccc(N)nc1	384.05
1053	C=CC1CC=CCC1	289.15
1054	C=C(C)C=CC(=C)C	291.25
1055	C1=CCCC=CCC1	311.15
1056	C=CC1=CCCCC1	295.85
1057	C=CC1CC=CCC1	289.25
1058	SCCCS	332.05
1059	CC(S)CS	308.15
1060	CSCSC	316.15
1061	COC(=O)CCl	324.85
1062	O=C(O)CCCl	398.15
1063	CCOC(=O)Cl	291.95
1064	CC(Cl)C(=O)O	380.15
1065	CC(=O)OCCl	282.05
1066	COCC(=O)Cl	301.15
1067	CC(Cl)C(=O)O	380.35
1068	CC(C)(O)CCl	334.15
1069	CCOCCCl	288.75
1070	OCCCCCl	350.35
1071	COCCCCl	301.05
1072	ClCC1CS1	330.65
1073	CCBr	253
1074	Nc1ccccc1O	441.15
1075	OCc1cccnc1	370.65
1076	Nc1ccc(O)cc1	462.15
1077	Nc1cccc(O)c1	428.15
1078	Cc1ccc[nH]c1=O	445.85
1079	CC(=O)c1ccc[nH]1	365.55
1080	ONc1ccccc1	393.35
1081	COc1ccccn1	305.15
1082	Nc1cccc(N)n1	434.45
1083	N#Cc1cccs1	326.45
1084	N#CC1CCCCC1	341.95
1085	Cc1ccc(C)n1C	325.35
1086	CC(Cl)[N+](=O)[O-]	302.85
1087	O=[N+]([O-])CCCl	329.65
1088	N#CC(Cl)Cl	309.15
1089	CO[PH](=O)OC	302.59
1090	Pc1ccccc1	244.25
1091	Cc1ccc(C=O)o1	345.15
1092	CC(=O)c1ccco1	344.25
1093	Oc1ccccc1O	400.15
1094	Oc1cccc(O)c1	400.15
1095	Oc1ccc(O)cc1	438.15
1096	Nc1cc[n+]([O-])cc1	358.85
1097	CC(=O)n1ccnc1	361.15
1098	Cc1ccccc1F	284.55
1099	Cc1ccc(F)cc1	285.05
1100	Cc1cccc(F)c1	282.55
1101	FCc1ccccc1	290.55
1102	COS(C)(=O)=O	377.15
1103	COS(=O)OC	303.15
1104	O=CC1CC=CCC1	330.35
1105	O=C(C1CC1)C1CC1	312.55
1106	CC1=CC(=O)CCC1	341.45
1107	O=CC1=CCCCC1	344.25
1108	CCc1ccc(C)o1	288.25
1109	CCCc1ccco1	287.95
1110	CC1=CCCC(=O)C1	328.65
1111	C#CC1(O)CCCC1	322.05
1112	CCc1ncc(C)[nH]1	410.95
1113	Cc1cc(C)n(C)n1	313.15
1114	Sc1ccccc1	323.75
1115	C#CCCCCCC	290.15
1116	C=CC1CCCCC1	294.25
1117	CC(C)=CC=C(C)C	298.15
1118	C1=CCCCCCC1	298.15
1119	CC=C1CCCCC1	297.05
1120	CCC1=CCCCC1	292.35
1121	CC1=CCCCCC1	293.75
1122	CC1=C(C)CCCC1	289.95
1123	CCC1C=CCCC1	286.05
1124	CC#CCCCCC	297.25
1125	C=CCC1CCCC1	285.35
1126	C=CCCCCC=C	282.55
1127	CC=CCCC=CC	286.85
1128	CC1(C)CC=CCC1	275.85
1129	CCC#CCCCC	295.15
1130	C=C(C)CCC(=C)C	280.15
1131	CCCC#CCCC	291
1132	OCC(O)CCl	408.15
1133	FCCCCCl	283.05
1134	SCCCCl	316
1135	C=C(Cl)CCl	283.15
1136	ClC=CCCl	300.95
1137	CC(Cl)=CCl	288.85
1138	C=CC(Cl)Cl	276.15
1139	CC=C(Cl)Cl	273.75
1140	ClC=CCCl	297.15
1141	C=C(C#N)C(=O)OC	340.75
1142	C=C(C#N)OC(C)=O	337.05
1143	Nc1ccccc1F	333.15
1144	Nc1ccc(F)cc1	351.05
1145	Nc1cccc(F)c1	350.35
1146	C=CN1CCCC1=O	367.05
1147	C=CCOCCC#N	356.05
1148	CNCc1ccco1	307.15
1149	Cc1nc(C)c(C)o1	306.45
1150	NCCc1c[nH]cn1	453.45
1151	CCCCCCC#N	333.65
1152	C#CCN(CC)CC	429.15
1153	CC#CN(CC)CC	311.85
1154	CC(=O)C(F)(F)F	243.15
1155	O=C(O)c1ccco1	367.35
1156	CC1=CC(=O)OC1=O	374.15
1157	O=c1ccc(=O)[nH][nH]1	515.55
1158	O=C(O)c1cnc[nH]1	526.35
1159	O=c1cc(O)[nH]cn1	443.75
1160	Oc1ccccc1F	319.85
1161	Oc1ccc(F)cc1	347.95
1162	Oc1cccc(F)c1	344.15
1163	CC1=C(O)C(=O)CC1	373.85
1164	O=CC1CCC=CO1	346.55
1165	O=C1CCCC(=O)C1	358.85
1166	O=C1CCC(=O)CC1	355.35
1167	O=C1CCCCC1=O	357.15
1168	C=CCOC(=O)C=C	342.35
1169	C=CC=COC(C)=O	306.45
1170	C#CCOC(=O)CC	315.25
1171	CC(O)c1ccco1	307.75
1172	CC#CC(=O)OCC	326.35
1173	COCc1ccco1	295.25
1174	C=COC(=O)C=CC	300.15
1175	CC=CC=CC(=O)O	400.15
1176	O=Cc1cccs1	350.95
1177	CN(C)C(N)=NC#N	337.55
1178	OC1CC2CCC1C2	347.55
1179	CC1CCCCC1=O	319.05
1180	CC1CCCC(=O)C1	321.15
1181	CCCCC#CCO	351.15
1182	C=C(C=O)CCCC	306.45
1183	C=CCC(O)CC=C	313.15
1184	C=C(C)CCC(C)=O	311.85
1185	CC1CCC(C)C1=O	313.75
1186	CC(=O)C=CC(C)C	320.65
1187	CC(=O)C1CCCC1	320.15
1188	C#CC(O)(CC)CC	310.95
1189	C#CC(O)CCCC	323.95
1190	C#CC(O)CC(C)C	323.25
1191	O=C1CCCCCC1	330.15
1192	CC1CCC(=O)CC1	319.05
1193	C#CC(C)(O)C(C)C	310.35
1194	O=CC1CCCCC1	314.15
1195	CCCCC=CC=O	326.85
1196	CC=CCOC=CC	287.55
1197	CC1CCCCC1=O	321
1198	C1CN2CCN1CC2	335.35
1199	C=CCN(N)CC=C	327.15
1200	N#CCCCCCN	366.75
1201	CCN(CC)CC#N	327.05
1202	Cc1ccsc1C	298.95
1203	Cc1csc(C)c1	296.15
1204	CCc1cccs1	294.25
1205	Cc1ccc(C)s1	297.05
1206	CCc1ccsc1	295.95
1207	C=C(C)CC(C)(C)C	267.05
1208	CC=CCCCCC	289.75
1209	CC(C)=C(C)C(C)C	285.95
1210	CC1(C)CCCCC1	280.35
1211	CCCC=CCCC	294.25
1212	CCC1CCCC1C	286.65
1213	C=C(CC)CCCC	283.55
1214	CC1CCCC(C)C1	282.55
1215	CC1CC(C)C(C)C1	282.35
1216	CC1CC(C)C(C)C1	282.35
1217	CC1CC(C)C(C)C1	282.35
1218	C=CC(CC)CCC	288.65
1219	C=C(CC)C(C)CC	279.85
1220	C=CC(C)(C)CCC	283.85
1221	CC(C)C1CCCC1	287.25
1222	CC1CCCCCC1	293.05
1223	CC1CCCC1(C)C	279.55
1224	CCC=C(C)CCC	282.35
1225	CC1CCC(C)(C)C1	279.55
1226	CCCC(C)=C(C)C	288.75
1227	C=CCCC(C)CC	288.65
1228	C=CCC(C)CCC	288.65
1229	C=CC(C)C(C)CC	283.85
1230	C=C(C)C(C)CCC	279.85
1231	CCC1(C)CCCC1	283.75
1232	C=C(C)C(CC)CC	279.85
1233	CC=CCC(C)(C)C	281.55
1234	CC1CCCCC1C	288.75
1235	CCC1CCCC1C	286.65
1236	CC1CCC(C)CC1	288.75
1237	CC1CCC(C)C1C	282.39
1238	C=CCCCC(C)C	288.65
1239	CCC=CCCCC	288.25
1240	C=CCC(C)C(C)C	283.85
1241	CC1CCC(C)CC1	283
1242	C=CCCCCCC	286
1243	CC(C)=CC(C)(C)C	275
1244	C=C(C)CCCCC	283
1245	CCCCC=C(C)C	281
1246	C=CC(CC)CCC	274.15
1247	C=CCC(C)CCC	275.15
1248	C1CCCCCCC1	301
1249	CCC1CCCCC1	308.15
1250	O=C(O)C(F)Cl	331.75
1251	N#CC=C(Cl)C#N	341.55
1252	Clc1ccccc1	302.15
1253	O=C(Cl)CCl	307.15
1254	O=CC(Cl)Cl	333.15
1255	CCC(Cl)Cl	280
1256	CC(Cl)CCl	289
1257	ClCCCCl	293
1258	CC(C)(Cl)Cl	268
1259	NC(=O)C(F)(F)F	360.15
1260	O=c1nc[nH]c(=O)[nH]1	574.05
1261	O=[N+]([O-])c1c[nH]cn1	471.75
1262	CN1C(=O)CCC1=O	379.05
1263	COC(=O)CCC#N	360.65
1264	CC(=O)OC(C)C#N	340.15
1265	CCOC(=O)CC#N	383.15
1266	O=C1CCCCCN1	409.85
1267	C=CC(=O)NC(C)C	392.85
1268	CCN1CCCC1=O	349.25
1269	C=CN(CC)C(C)=O	345.65
1270	NCC1CCC=CO1	343.65
1271	ON=C1CCCCC1	363.15
1272	O=CN1CCCCC1	364.15
1273	CC1CCCNC1=O	411.75
1274	CC1CCC(=O)N1C	362.55
1275	CC(C)OCCC#N	341.45
1276	Cc1csc(C)n1	315.15
1277	Cc1ncsc1C	324.25
1278	CC1CCCC(C)N1	284.15
1279	C1CCCNCCC1	302.55
1280	CC1(C)CCCNC1	305.35
1281	NCC1CCCCC1	316.45
1282	CCC1CCNCC1	306.95
1283	CC1CNCC(C)C1	305.15
1284	CNC1CCCCC1	302.55
1285	CCN1CCCCC1	291
1286	Clc1ccccn1	338.15
1287	Clc1cccnc1	338.15
1288	O=C(O)C(F)(F)F	270.15
1289	O=c1c(O)c(O)c1=O	392.99
1290	CC(O)C(F)(F)F	311.95
1291	OCCC(F)(F)F	320.25
1292	Fc1cccc(F)c1	275.15
1293	Fc1ccc(F)cc1	275.25
1294	Fc1ccccc1F	275.35
1295	O=C1CCCC(=O)O1	394.05
1296	COS(=O)(=O)F	283.15
1297	CC1CC(=O)OC1=O	381.35
1298	C=CC1COC(=O)O1	369.85
1299	C=CC1COC(=O)O1	370.15
1300	CCOC(=O)C=[N+]=[N-]	319.15
1301	O=NN1CC=CCO1	303.45
1302	NCc1cc(=O)[nH]o1	423.55
1303	C=C(C)C(=O)OCC	288.75
1304	C=CCOCC1CO1	330.35
1305	C=COC(=O)CCC	299.55
1306	C1CC2(CCO1)CO2	321.65
1307	O=C1CCCCCO1	357.96
1308	CC=CC(=O)OCC	275.15
1309	CCC1CCC(=O)O1	371.45
1310	COC(=O)C=C(C)C	305.25
1311	C=CC(=O)OCCC	299.25
1312	C=CC(O)C(O)C=C	365.95
1313	CCCC=CC(=O)O	388.55
1314	C=CCOC(=O)CC	306.65
1315	C=CC1OCC(C)O1	278.45
1316	CCC(=O)CC(C)=O	326.75
1317	O=C(O)C1CCCC1	366.15
1318	CCCC(=O)C(C)=O	301.15
1319	CCC=CCC(=O)O	379.55
1320	CCC(=O)C(=O)CC	305.95
1321	COC1CCC=CO1	289.85
1322	CC(=O)C1OC1(C)C	308.45
1323	CCOC(=O)C1CC1	302.85
1324	C=CC(C)(C)C(=O)O	357.45
1325	CCC=C(C)C(=O)O	380.15
1326	CC=CC(C)C(=O)O	370.55
1327	C1COCC2(C1)CO2	328.35
1328	C=CCCCC(=O)O	373.25
1329	C=CCC(=O)OCC	303.85
1330	CC=C(C)C(=O)OC	308.15
1331	CC(C)C=CC(=O)O	379.15
1332	CC(=O)CCC(C)=O	352.15
1333	CC=CCOC(C)=O	303.15
1334	C=CC(C)OC(C)=O	288.15
1335	CN1CCN(C)C1=O	349.65
1336	O=NN1CCCCC1	365.95
1337	SCc1ccco1	318.15
1338	OCc1cccs1	349.85
1339	Cn1cc[nH]c1=S	320.55
1340	Cc1nnc(C)s1	354.35
1341	OCC1CCCCC1	344.25
1342	CCC(C)CC(C)=O	304.15
1343	CC(=O)CCC(C)C	314.25
1344	CCC(=O)C(C)(C)C	295.55
1345	CC(=O)CC(C)(C)C	292.05
1346	OCCC1CCCC1	343.55
1347	CCCCC(C)C=O	305.75
1348	COC1CCCCC1	293.85
1349	CCCC(C)C(C)=O	304.15
1350	CC1CCCC(O)C1	335.95
1351	CCCC(=O)C(C)C	297.05
1352	CC1CCCC(O)C1	335.95
1353	CC1CCCCC1O	332.05
1354	CCC(=O)C(C)CC	304.15
1355	CCCC(C)CC=O	305.75
1356	CCCCC=CCO	341.65
1357	CC1CCCCC1O	331.15
1358	CC1CCC(O)CC1	343.15
1359	CC1(O)CCCCC1	340.93
1360	CCC(=O)CC(C)C	304.15
1361	C=CCC(O)CCC	329.55
1362	CC(C)C(=O)C(C)C	288.15
1363	CCCCCC(C)=O	320.15
1364	CC1CCCCC1O	331
1365	CCCCC(=O)CC	310.15
1366	CCCC(=O)CCC	322.15
1367	CC1CCC(O)CC1	343.15
1368	OC1CCCCCC1	344
1369	CCCCCCC=O	314
1370	CC1CNC(C)CN1	331.45
1371	NC1CCCCC1N	348.15
1372	CC1CNC(C)CN1	345.15
1373	NC1CCCC(N)C1	352.55
1374	NCC1CCNCC1	351.15
1375	C=CCSCC=C	319.25
1376	CCCC(C)(C)CC	282.45
1377	CCC(C)C(C)(C)C	281.85
1378	CCC(C)C(C)CC	304.75
1379	CCCC(C)CCC	279.85
1380	CC(C)CCC(C)C	299.85
1381	CC(C)(C)C(C)(C)C	277.55
1382	CCCCCCCC	286.15
1383	CCC(C)(C)C(C)C	284.55
1384	CC(C)C(C)C(C)C	278.15
1385	CCC(C)(CC)CC	286.25
1386	CC(C)CC(C)(C)C	261.15
1387	CCCC(C)C(C)C	270
1388	CCCCCC(C)C	277
1389	CCCC(CC)CC	279
1390	CCCCC(C)CC	280
1391	Clc1cnccn1	330.15
1392	CS(=O)(=O)Cl	315.35
1393	ClCOCCl	348.05
1394	OCC(Cl)Cl	351.45
1395	S=C(Cl)Cl	335.15
1396	Fc1cccc(F)n1	307.05
1397	O=C1CCC(=O)N1O	385.65
1398	C=C(C)C(=O)NCO	412.15
1399	CC(=O)N(C)C(C)=O	339.65
1400	O=CN1CCOCC1	386.15
1401	O=NN1CCNCC1	386.95
1402	Cn1sccc1=O	337.45
1403	CN1CCC(O)CC1	360.95
1404	CC1CNCC(C)O1	317.55
1405	CCCCCC(N)=O	375.37
1406	CCN(CC)C(C)=O	342.45
1407	CCCCNC(C)=O	387.65
1408	C=COCCN(C)C	301.55
1409	CCN1CCOCC1	300.95
1410	CC(=O)CC(C)(C)N	329.35
1411	CN(C)C(=N)N(C)C	333.15
1412	CC(C)(C)N=C=S	311.45
1413	CCCCN=C=S	339.25
1414	CC(C)CN=C=S	317.35
1415	CCCCSC#N	338.05
1416	CCCCCC(C)N	327.15
1417	CC(C)CCN(C)C	283.15
1418	CCNC(C)C(C)C	278.75
1419	CCCC(N)CCC	314.45
1420	CCC(C)CC(C)N	302.05
1421	CCCCCCCN	317.15
1422	O=C(O)C=CC(=O)O	471.15
1423	NC(=O)N=NC(N)=O	399.15
1424	COC(=O)CC(C)=O	334.75
1425	CC(=O)CCC(=O)O	388.15
1426	CC(=O)COC(C)=O	325.05
1427	CCOC(=O)C(C)=O	318.15
1428	C=CC(=O)OCCO	371.45
1429	CCCC(=O)C(=O)O	349.75
1430	CCC1COC(=O)O1	401.55
1431	CC(C)C(=O)C(=O)O	344.15
1432	O=NN1CCOCC1	363.65
1433	CC(=O)NNC(C)=O	456.45
1434	CC#Cc1ccccc1	335.37
1435	C#Cc1ccc(C)cc1	322.04
1436	C1=Cc2ccccc2C1	331.15
1437	CCC(CC)C(=O)O	360.15
1438	CCCC(C)C(=O)O	364.15
1439	CCOC(=O)C(C)C	286.15
1440	OCC1CCCCO1	366.45
1441	CCC(C)CC(=O)O	361.55
1442	CCC(C)OC(C)=O	289.25
1443	CCCC(=O)OCC	292.59
1444	CCCOC(=O)CC	297.55
1445	CC(=O)OCC(C)C	294.85
1446	CC(C)CCOC=O	295.45
1447	CC(=O)CC(C)(C)O	331.15
1448	CCC1(C)OCCO1	286.15
1449	CC(=O)OC(C)(C)C	284.15
1450	COC(=O)CC(C)C	292.55
1451	CCC(C)(C)C(=O)O	352.55
1452	CCCCC(=O)OC	295.35
1453	CCC(=O)OC(C)C	292.55
1454	CC(C)(C)CC(=O)O	353.75
1455	CC(C)OCC1CO1	306.45
1456	CC(C)C(C)C(=O)O	356.55
1457	COCC1CCCO1	306.45
1458	CC(=O)CCCCO	365.35
1459	COC(=O)C(C)(C)C	279.85
1460	CCC(C)C(=O)OC	292.55
1461	CCCC(C)C(=O)O	364.25
1462	CCCCOC(C)=O	297.15
1463	CCCCCC(=O)O	377.15
1464	CC(C)OCC1CO1	306
1465	CCCCCOC=O	299.85
1466	CCCCNC(N)=O	335.45
1467	CCNC(=O)NCC	394.25
1468	CN(C)C(=O)N(C)C	327.05
1469	CN(C)N=NN(C)C	535.55
1470	C=CCNC(N)=S	342.65
1471	CCCC(O)CCC	334.95
1472	CCCCC(O)CC	327.55
1473	CC(C)(C)C(C)(C)O	306.75
1474	CCC(C)(O)C(C)C	313.75
1475	CCC(O)(CC)CC	313.15
1476	CCCC(C)(O)CC	322.55
1477	CCCC(O)C(C)C	313.71
1478	CCOC(C)(C)CC	278.15
1479	CCCCOC(C)C	280.45
1480	CCCCOCCC	288.75
1481	CCC(O)C(C)(C)C	311.45
1482	CCCCCCOC	294.15
1483	CCCOCC(C)C	282.15
1484	CCCCCOCC	289.55
1485	CC(C)C(O)C(C)C	310.15
1486	CCCCC(C)CO	334.95
1487	CCCCCCCO	346.15
1488	CCCCCC(C)O	344
1489	CCCCC(C)CO	333.15
1490	CC(C)CCCCO	334.95
1491	CCN(CC)CCN	303.75
1492	CCNCCN(C)C	297.05
1493	NCCCCCCN	367.15
1494	CC(C)N(N)C(C)C	303.45
1495	C1CCCSCC1	324.85
1496	SC1CCCCC1	316
1497	FC(F)=C(F)Cl	245.15
1498	Cc1cc(Cl)n[nH]1	408.75
1499	Cc1ccc(C#N)cc1	358.79
1500	N#CCc1ccccc1	374.15
1501	c1ccc2[nH]ccc2c1	380.99
1502	Cc1ccccc1C#N	358.15
1503	Cc1cccc(C#N)c1	359.85
1504	CC(C)CCON=O	283.15
1505	CCCCCON=O	282.05
1506	CC(C)C(N)C(=O)O	356.16
1507	CCC(CC)[N+](=O)[O-]	319.25
1508	CCCCOC(N)=O	381.15
1509	CCNC(=O)OCC	348.75
1510	CNCCCC(=O)O	370.45
1511	CCN(CC)CCO	322.05
1512	CCCCNCCO	352.45
1513	NCCCCCCO	346.65
1514	CC(C)(C)NCCO	342.05
1515	CCCCC(N)CO	373.15
1516	CC(C)CC(N)CO	363.75
1517	CC(C)CNCCO	345.25
1518	N#CCCCCCl	371.45
1519	O=C(O)C(=O)C(=O)O	486.15
1520	O=C(O)CCC(=O)O	384.05
1521	COC(=O)C(=O)OC	348.15
1522	O=COCCOC=O	359.35
1523	NC(=O)NCC(=O)O	424.65
1524	CC(C)(N=O)[N+](=O)[O-]	309.25
1525	CNC(N)=N[N+](=O)[O-]	378.55
1526	c1ccc2occc2c1	329
1527	c1ccc2[nH]cnc2c1	481.59
1528	CCOC(=O)C(C)O	327.75
1529	CCOC(=O)OCC	304.25
1530	CCOC(=O)C(C)O	319.15
1531	N#Cc1ccccc1N	395.35
1532	COC(=O)C(C)(C)O	309.95
1533	N#Cc1cccc(N)c1	385.15
1534	COCCC(=O)OC	320.15
1535	CCOC(=O)COC	319.25
1536	COCCOC(C)=O	317.05
1537	c1ccc2[nH]ncc2c1	401.65
1538	N#Cc1ccc(N)cc1	400.25
1539	CCOCCC(=O)O	380.35
1540	CCOC(=O)C(C)O	319.15
1541	C=CS(=O)(=O)C=C	375.15
1542	O=S1(=O)CC=CC1	385.15
1543	CCP(CC)CC	255.95
1544	CC(=O)NC(N)=S	353.15
1545	C=C(C)c1ccccc1	318.71
1546	C=Cc1cccc(C)c1	320.55
1547	C=CCc1ccccc1	306.45
1548	c1ccc2c(c1)CCC2	323.15
1549	C=Cc1ccc(C)cc1	321.85
1550	CC=Cc1ccccc1	322.55
1551	c1ccc(C2CC2)cc1	317.05
1552	CC=Cc1ccccc1	322.55
1553	C=Cc1ccccc1C	320.15
1554	CC(C)(O)C(C)(C)O	350.35
1555	CCC(C)(CO)CO	369.25
1556	CC(O)CC(C)(C)O	367.05
1557	CC(C)OCCCO	328.35
1558	CCOCCCCO	330.05
1559	CCCCOCCO	333.15
1560	CCC(O)C(C)CO	381.65
1561	CCOCCOCC	293.75
1562	CCCOCC(C)O	321.15
1563	CC(C)COCCO	323.55
1564	CC(O)C(C)C(C)O	364.45
1565	CCCCC(O)CO	395.15
1566	CC(O)C(C)(C)CO	360.75
1567	CC(O)CCC(C)O	374.15
1568	CC(O)COC(C)C	321.35
1569	CCC(C)OCCO	323.35
1570	CCOC(C)OCC	252
1571	OCCCCCCO	420
1572	CC(O)COC(C)C	309.15
1573	CCCOCC(C)O	321.15
1574	CC(O)CCC(C)O	383.15
1575	CCC(O)C(C)CO	394.15
1576	CC(O)CC(C)(C)O	366.15
1577	C=COCCSC	319.05
1578	CCCCCCCF	286
1579	CCCCCCS	303.15
1580	CCCSCCC	301.45
1581	CC(C)SC(C)C	280.15
1582	CCCSC(C)C	296.15
1583	CCCCCSC	312.85
1584	CC(C)=CC(=O)Cl	324.15
1585	Clc1cccs1	295.15
1586	ClC1CCCCC1	301.15
1587	C#CCBr	290.25
1588	O=C(O)CC[N+](=O)[O-]	421.55
1589	COC(=O)C[N+](=O)[O-]	378.15
1590	c1ccc2nocc2c1	367.05
1591	c1ccc2ocnc2c1	338.45
1592	N#Cc1ccc(O)cc1	397.05
1593	N#Cc1cccc(O)c1	380.75
1594	N#CC=Cc1ccco1	360.35
1595	O=C=Nc1ccccc1	324.15
1596	c1ccc2[nH]nnc2c1	407.05
1597	CC(C)CO[N+](=O)[O-]	314.05
1598	CCC(C)O[N+](=O)[O-]	314.05
1599	COCCOC(N)=O	404.15
1600	CCCCO[N+](=O)[O-]	309.25
1601	NC(=S)NNC=O	364.65
1602	C=Cc1ccc(C)nc1	329.75
1603	c1ccc2c(c1)CCN2	365.95
1604	CN=Cc1ccccc1	386.15
1605	C=Cc1ccc(N)cc1	381.75
1606	CN(CCO)CCO	399.85
1607	CNCC(OC)OC	302.55
1608	S=C1NCCS1	341.25
1609	N#CCBr	297.45
1610	C[As](C)C	373.15
1611	CC([N+](=O)[O-])[N+](=O)[O-]	352.15
1612	O=C(NCO)NCO	505.45
1613	c1ccc(C2CO2)cc1	352.55
1614	O=CCc1ccccc1	362.35
1615	c1ccc2c(c1)COC2	336.15
1616	c1ccc2c(c1)CCO2	339.15
1617	Cc1ccccc1C=O	352.65
1618	Cc1cccc(C=O)c1	351.15
1619	C=Cc1ccc(O)cc1	365.45
1620	CC(=O)c1ccccc1	354.05
1621	Cc1ccc(C=O)cc1	353.15
1622	CC(CO)(CO)CO	418.65
1623	COCCOCCO	357.05
1624	N=C(N)c1ccccc1	353.05
1625	COCC(O)COC	331.35
1626	COC(C)(OC)OC	289.15
1627	CCOCC(O)CO	372.65
1628	O=S1(=O)CCCC1	443.83
1629	CCOC(=O)CS	320.95
1630	C=CS(=O)(=O)CC	382.15
1631	COC(=O)CCS	333.15
1632	CC(C)c1ccccc1	304.15
1633	CCc1ccccc1C	312.55
1634	C=CC1CC2C=CC1C2	299.35
1635	CC=C1CC2C=CC1C2	311.45
1636	C1=CCC2CC=CC2C1	306.95
1637	Cc1cccc(C)c1C	321
1638	Cc1ccc(C)c(C)c1	321
1639	Cc1cc(C)cc(C)c1	317.15
1640	C#CCCCCCC#C	314
1641	CCc1cccc(C)c1	311.15
1642	CCc1ccc(C)cc1	309.15
1643	CC=C1CC2C=CC1C2	311
1644	CCCc1ccccc1	320.15
1645	NC(=S)C(N)=S	379.35
1646	C1CSCSC1	363.15
1647	C1CSCCS1	355.25
1648	C=CCOC(=O)Cl	361.15
1649	C=C(C)OC(=O)Cl	289.25
1650	CCCCC(=O)Cl	305.95
1651	CC1(CCl)COC1	316.05
1652	CCC(C)C(=O)Cl	298.65
1653	CC(C)CC(=O)Cl	298.65
1654	CC(C)(C)C(=O)Cl	282.05
1655	CCCCCCCl	299.15
1656	CCC(C)(Cl)CC	282.55
1657	CCCC(Cl)CC	298.15
1658	CC(C)(C)CCCl	292.15
1659	CCC(CC)CCl	298.15
1660	FC(F)(Cl)Cl	284.15
1661	C=C(C)Br	327.15
1662	C=CCBr	272.15
1663	CC(=O)OO[N+](=O)[O-]	357.85
1664	N#Cc1ccc(F)cc1	338.75
1665	N#Cc1cccc(F)c1	340.15
1666	CC(=O)c1cccnc1	377.15
1667	Nc1ccc(C=O)cc1	395.14
1668	Cc1ccccc1N=O	347.85
1669	ON=Cc1ccccc1	382.05
1670	CC(=O)c1ccncc1	360.15
1671	CC(=O)c1ccccn1	346.45
1672	O=CNc1ccccc1	423.35
1673	NC(=O)c1ccccc1	453.15
1674	NC(CS)C(=O)O	404.65
1675	NCCc1ccccc1	363.75
1676	Cc1cccc(N)c1C	369.15
1677	Cc1cccc(C)c1N	364.15
1678	Cc1ccccc1CN	357.05
1679	Cc1ccc(N)c(C)c1	363.75
1680	Cc1ccc(C)c(N)c1	367.05
1681	Cc1cccc(CN)c1	353.75
1682	CCNc1ccccc1	358.15
1683	Cc1ccc(CN)cc1	348.15
1684	Cc1cc(C)cc(N)c1	366.45
1685	CCc1cnccc1C	343.25
1686	CCc1ccnc(C)c1	330.15
1687	CCc1ccccc1N	358.15
1688	CNc1ccccc1C	349.55
1689	CC(N)c1ccccc1	348.95
1690	CNc1cccc(C)c1	350.45
1691	Cc1cc(C)c(C)cn1	331.05
1692	CCc1cccc(C)n1	316.55
1693	CCCc1ccncc1	337.66
1694	Cc1ccc(C)c(C)n1	320.75
1695	Cc1ccnc(C)c1C	335.05
1696	Cc1ccc(N)cc1C	371.45
1697	CNCc1ccccc1	350.95
1698	CCc1ccc(C)nc1	339.25
1699	CCc1cccc(N)c1	358.15
1700	CCc1ccc(N)cc1	358.15
1701	CNc1ccc(C)cc1	345.25
1702	CC(C)c1ccccn1	296.35
1703	Cc1cnc(C)c(C)c1	315.95
1704	Cc1cc(C)nc(C)c1	330
1705	CN(C)c1ccccc1	335.95
1706	O=Cc1ccccc1O	349.85
1707	O=Cc1ccc(O)cc1	374.45
1708	c1ccc2c(c1)OCO2	328.15
1709	CC1=CC(=O)C=CC1=O	338.05
1710	O=Cc1cccc(O)c1	371.75
1711	O=CC=Cc1ccco1	361.95
1712	O=C(O)c1ccccc1	394.15
1713	NC(=O)c1cccnc1	429.15
1714	OCC(O)C(O)CO	481.95
1715	ON=Cc1ccncc1	345.25
1716	ON=Cc1ccccn1	346.65
1717	NC(=O)c1ccncc1	429.15
1718	O=S1(=O)CCCO1	406.93
1719	OCCc1ccccc1	371.55
1720	Cc1ccccc1CO	377.55
1721	CCc1ccccc1O	351.45
1722	Cc1ccc(O)cc1C	367.15
1723	CC(O)c1ccccc1	364.35
1724	COc1cccc(C)c1	327.15
1725	COc1ccc(C)cc1	326.45
1726	COCc1ccccc1	326.15
1727	Cc1cccc(C)c1O	351.45
1728	COc1ccccc1C	324.15
1729	Cc1cccc(CO)c1	378.75
1730	Cc1ccc(CO)cc1	378.15
1731	CCc1cccc(O)c1	367.15
1732	CC(O)c1ccccc1	358.15
1733	COC1=CC=CC=CC1	345.65
1734	CCOc1ccccc1	328.15
1735	Cc1cc(C)cc(O)c1	365.45
1736	Cc1cccc(O)c1C	368
1737	Cc1ccc(O)c(C)c1	367
1738	Cc1ccc(C)c(O)c1	368
1739	CCc1ccc(O)cc1	377.05
1740	Cc1cc(N)ccc1N	413.75
1741	Cc1ccc(N)cc1N	422.65
1742	Cc1ccc(N)c(N)c1	405.25
1743	Cc1c(N)cccc1N	421.45
1744	CN(C)c1ccncc1	344.85
1745	Cc1cc(N)cc(C)n1	399.61
1746	CN(C)c1ccccn1	347.15
1747	Cc1cnc(C)c(C)n1	327.55
1748	CN(N)c1ccccc1	366.75
1749	Cc1cccc(N)c1N	404.25
1750	CCS(=O)(=O)CC	391.55
1751	C#CCC1CCCCC1	310.65
1752	CCSSCC	313.15
1753	CSCCSC	333.05
1754	COC(=O)C(=O)Cl	319.85
1755	CC(C)OC(=O)Cl	298.15
1756	CCCOC(=O)Cl	302.25
1757	O=C(O)CCCCl	374.25
1758	COC(=O)CCCl	313.65
1759	CCOCC(=O)Cl	480.55
1760	COC(=O)C(C)Cl	310.75
1761	CCOC(=O)CCl	338.75
1762	CC(=O)OCCCl	339.25
1763	CC(=O)Br	322.75
1764	O=CCBr	346.75
1765	ClCC#CCCl	433.15
1766	C=C(Cl)C(=C)Cl	310.35
1767	CC(C)Br	292.55
1768	CCCBr	298.15
1769	O=C(O)c1cccnc1	403.85
1770	O=Nc1ccc(O)cc1	387.75
1771	O=C(O)c1ccncc1	466.45
1772	O=[N+]([O-])c1ccccc1	360.95
1773	NC(=O)c1cnccn1	443.05
1774	COc1ccccc1N	380.15
1775	OCCc1ccccn1	365.95
1776	CNc1ccc(O)cc1	421.75
1777	COc1cccc(N)c1	382.75
1778	Nc1cccc(CO)c1	402.75
1779	Cc1ccc(N)cc1O	389.45
1780	Cc1cccc(O)c1N	372.05
1781	Cc1ccc(N)c(O)c1	372.95
1782	OCCc1ccncc1	374.65
1783	Nc1ccccc1CO	399.45
1784	Cc1ccc(O)c(N)c1	371.75
1785	COc1ccc(N)cc1	377.65
1786	CC(=O)c1cccn1C	349.35
1787	CCc1c(C)c[nH]c1C	344.15
1788	CCCCn1cccc1	330.05
1789	CC(C)(Cl)[N+](=O)[O-]	310.55
1790	CC(Cl)C[N+](=O)[O-]	332.95
1791	CC(CCl)[N+](=O)[O-]	332.95
1792	N#CC(Cl)CCl	357.05
1793	COP(OC)OC	356.85
1794	COP(C)(=O)OC	342.05
1795	OCP(CO)CO	415.45
1796	CCOC(=O)C(F)F	298.15
1797	O=C(F)c1ccccc1	327.45
1798	O=Cc1cccc(F)c1	329.85
1799	O=Cc1ccc(F)cc1	329.85
1800	O=Cc1ccccc1F	328.15
1801	O=S1(=O)OCCO1	366.65
1802	COc1ccccc1O	355.35
1803	Cc1cc(O)ccc1O	413.35
1804	COc1cccc(O)c1	392.25
1805	COc1ccc(O)cc1	393.95
1806	Cc1ccc(O)c(O)c1	394.25
1807	Cc1cccc(O)c1O	389.85
1808	Cc1ccc(O)cc1O	403.25
1809	Cc1cc(O)cc(O)c1	432.15
1810	Cc1c(O)cccc1O	416.05
1811	OCc1cccc(O)c1	420.49
1812	Cc1cc(C)oc(=O)c1	363.25
1813	Cc1cc(=O)cc(C)o1	376.55
1814	OCc1ccc(O)cc1	418.95
1815	CCOS(C)(=O)=O	373.15
1816	C#CC1(O)CCCCC1	346.15
1817	CC1CC=CCC1C=O	326.35
1818	C=CC1CCC2OC2C1	321.25
1819	CC(=O)C1=CCCCC1	346.35
1820	CC1=CC(=O)CC(C)C1	352.15
1821	CC(C)(C)c1ccco1	280
1822	SCc1ccccc1	343.15
1823	CSc1ccccc1	330.35
1824	Cc1cccc(S)c1	345.95
1825	Cc1ccccc1S	337.05
1826	Cc1ccc(S)cc1	342.65
1827	C1CC2CCCC(C1)C2	310.45
1828	C1CCC2CCCC2C1	310.45
1829	CC#CCCCCCC	312.15
1830	CCC#CCCCCC	310.75
1831	CCCC#CCCCC	311.45
1832	C=CCCCCCC=C	299
1833	C#CCCCCCCC	306.15
1834	COC(CCl)OC	302.04
1835	OCCOCCCl	363.75
1836	CCSC(=O)Cl	303.75
1837	FCCCCCCl	310.05
1838	CCSCCCl	325.15
1839	O=CC=C(Cl)Cl	327.15
1840	OCCBr	313.15
1841	COCBr	299.85
1842	ClCC=CCCl	327.55
1843	C=C(CCl)CCl	309.85
1844	CC=C(Cl)CCl	305.55
1845	CC(Cl)=CCCl	300.15
1846	ClCC=CCCl	326.15
1847	C=CC(Cl)CCl	301.15
1848	C=CC(=O)OCCC#N	373.55
1849	CCN1C(=O)C=CC1=O	346.15
1850	C=C(C#N)C(=O)OCC	352.35
1851	Cc1nc(N)nc(N)n1	525.15
1852	CNc1ccc(F)cc1	336.65
1853	N#CC1(O)CCCCC1	385.25
1854	O=C=NC1CCCCC1	322.05
1855	Nc1ccccc1S	368.95
1856	CN1C2CCCC1CC2	315.35
1857	C1CCC2NCCC2C1	332.55
1858	CCCCCCCC#N	346
1859	COP(=O)(O)OC	323.55
1860	CCOP(=O)(O)O	379.55
1861	O=P(O)(CO)CO	578.25
1862	O=Cc1ccc(CO)o1	352.55
1863	Oc1cc(O)cc(O)c1	448.05
1864	Cc1occc(=O)c1O	400.47
1865	Oc1ccc(O)c(O)c1	307.35
1866	COC(=O)c1ccco1	331.75
1867	COC(=O)c1ccoc1	320.45
1868	Oc1cccc(O)c1O	458.15
1869	Cc1cc(=O)[nH]c(=O)[nH]1	481.15
1870	COc1ccccc1F	322.95
1871	OCc1cccc(F)c1	363.75
1872	COc1cccc(F)c1	317.05
1873	OCc1ccc(F)cc1	363.15
1874	COc1ccc(F)cc1	316.15
1875	COS(=O)(=O)OC	356.48
1876	Nc1nc(N)nc(N)n1	570.15
1877	C=CCOC(=O)C(=C)C	310.15
1878	O=C(O)C1=CCCCC1	384.15
1879	CC=CC=CC(=O)OC	343.15
1880	CC(=O)C1CCCC1=O	345.95
1881	O=C(O)C1CC=CCC1	383.05
1882	CCOCc1ccco1	314.35
1883	N#CCN1CCOCC1	360.15
1884	Oc1ccccc1S	362.25
1885	CC(=O)c1cccs1	355.55
1886	CC(=O)c1ccsc1	342.15
1887	C#CC(C)(O)CC(C)C	317.55
1888	CC(=O)CCC=C(C)C	323.15
1889	C1CCCC2OC2CC1	329.25
1890	CCCC=C(C=O)CC	341.15
1891	C#CC(O)CCCCC	336.15
1892	CC(=O)C1CCCCC1	334.55
1893	CC1(C)CCCCC1=O	323.25
1894	CCC(C)=C(C)C(C)=O	334.55
1895	CC1CCCC(C)C1=O	326.95
1896	CC1(C)CCCC(=O)C1	323.25
1897	OCC1CC2CCC1C2	357.15
1898	CCC1CCC(=O)CC1	331.65
1899	C=CCC(C)(O)CC=C	341.95
1900	CC1CC(=O)C(C)(C)C1	318.55
1901	O=C1CCCCCCC1	345.93
1902	CC1CC(C)(C)CC1=O	318.55
1903	CCCc1cccs1	305.45
1904	Cc1cc(C)c(C)s1	309.35
1905	CCc1sccc1C	306.85
1906	CC1CCCC(C)C1C	301.05
1907	CCCC1CCCCC1	308.15
1908	CC1CC(C)CC(C)C1	301.05
1909	CC1CC(C)CC(C)C1	301.05
1910	CCCCC1CCCC1	307.85
1911	CC1CCCC(C)(C)C1	298.35
1912	CC(C)CC1CCCC1	304.65
1913	CCC1CCCCC1C	305.05
1914	CCC1CCCCC1C	305.05
1915	CCC1(C)CCCCC1	302.35
1916	CC1CCCCC1(C)C	298.35
1917	CC1CCC(C)C(C)C1	301.05
1918	CCC1CCCC(C)C1	305.05
1919	CC1(C)CCC(C)(C)C1	291.05
1920	C=CCCCCCCC	297.15
1921	CC(C)C1CCCCC1	308.75
1922	CC=CCCCCCC	305.35
1923	C=CCCCCC(C)C	291.15
1924	ClCc1ccccc1	347.04
1925	Cc1ccccc1Cl	324.15
1926	Cc1ccc(Cl)cc1	325.15
1927	Cc1cccc(Cl)c1	323.75
1928	O=C(Cl)C(=O)Cl	277.65
1929	FCCBr	272.15
1930	CC(=O)C(Cl)Cl	297.55
1931	O=C(Cl)CCCl	334.85
1932	O=C(CCl)CCl	362.15
1933	CCCC(Cl)Cl	291.45
1934	CC(C)(Cl)CCl	288.75
1935	CC(C)C(Cl)Cl	288.75
1936	CC(Cl)CCCl	303.75
1937	CC(Cl)C(C)Cl	291.45
1938	CCC(C)(Cl)Cl	288.75
1939	ClCCCCCl	313.95
1940	CCC(Cl)CCl	299
1941	Nc1nc(O)cc(=O)[nH]1	553.55
1942	Cn1cncc1[N+](=O)[O-]	425.85
1943	Cn1ccnc1[N+](=O)[O-]	413.75
1944	O=C1CCCCC(=O)N1	421.95
1945	N#CCCCCC(=O)O	419.55
1946	CC(=O)N1CCCCC1	370.15
1947	O=CNC1CCCCC1	422.15
1948	CN1CCCCCC1=O	376.45
1949	C=CC(=O)N(CC)CC	364.63
1950	CC(C)N1CCCC1=O	366.15
1951	CCCCOCCC#N	361.35
1952	CCC1CCC(C)NC1	317.35
1953	CCCCN1CCCC1	309.25
1954	NC1CCCCCCC1	335.95
1955	CCNC1CCCCC1	316.05
1956	CCCN1CCCCC1	312.95
1957	CCCC1CCNCC1	321.55
1958	CNCC1CCCCC1	314.45
1959	CCCC1CCCCN1	321.55
1960	CN(C)C1CCCCC1	312
1961	Nc1ccccc1Cl	371.15
1962	Nc1cccc(Cl)c1	397.05
1963	Cc1cccc(Cl)n1	346.15
1964	Nc1ccc(Cl)cc1	333.85
1965	Cc1ccnc(Cl)c1	362.75
1966	C[As](F)F	279.05
1967	NC(=O)C(Cl)Cl	377.45
1968	COC(=O)C(F)(F)F	266.15
1969	O=C1CC(=O)NC(=O)N1	423.15
1970	N#CC(C#N)=C(C#N)C#N	496.15
1971	CC(C)(O)C(F)(F)F	320.55
1972	CC(O)CC(F)(F)F	327.5
1973	OCCCC(F)(F)F	306.95
1974	N#Cc1ccc(C#N)cc1	415.95
1975	O=C1OC2CCCC1O2	362.95
1976	N#Cc1ccccc1C#N	426.45
1977	C=CC(=O)OCC1CO1	349.25
1978	N#Cc1cccc(C#N)c1	416.15
1979	O=c1cc[nH]c(=S)[nH]1	430.85
1980	c1ccc2ccccc2c1	352.15
1981	O=C(O)C1CCCCC1	380.15
1982	C=CC(=O)OCC(C)C	305.95
1983	C=CC(=O)OCCCC	312.55
1984	C=CCCCCC(=O)O	386.45
1985	O=C(O)CC1CCCC1	387.15
1986	CC(=O)OCC=C(C)C	322.15
1987	CC1CCCCOC1=O	359.15
1988	C=C(C)C(=O)OCCC	307.85
1989	CC(=O)C(C)(C)C(C)=O	330.15
1990	C=COC(=O)C(C)(C)C	311.55
1991	O=COC1CCCCC1	326.45
1992	CC(=O)CC(C)C(C)=O	344.15
1993	C=C(C)C(=O)OC(C)C	304.15
1994	CC=C(C)C(=O)OCC	317.15
1995	CCC(=O)CC(=O)CC	336.55
1996	C#CC(OCC)OCC	305.35
1997	CC(=O)C(=O)CC(C)C	306.15
1998	CCOC(=O)C1CCC1	316.35
[truncated: 6,025 more rows]

## Sheet: Table S4
Table S4. The details of the distribution of the prediction results.
3D-MrDNN
	lipophilicity		rat oral LD50		flashpoint
seed	MAE	RMSE	MAE	RMSE	MAE	RMSE
2023	0.382782	0.493671	0.995528	1.34202	15.3216	24.744
2024	0.37002	0.487777	1.03544	1.42588	16.5429	27.8609
2025	0.358958	0.473117	1.00614	1.4346	14.7568	24.5627
2026	0.412567	0.541552	1.03015	1.42032	15.2146	24.8535
2027	0.371065	0.483253	0.964139	1.2873	15.8617	28.0237
2028	0.402253	0.523712	1.02883	1.38924	15.6392	26.4566
2029	0.386202	0.510367	0.993536	1.38974	15.999	27.0472
2030	0.383679	0.489098	0.999172	1.37172	16.7154	27.9092
2031	0.417985	0.580908	1.02727	1.40118	13.4808	20.9125
2032	0.376051	0.48443	0.999718	1.37903	15.1682	24.9428
Overall	0.386±0.018	0.507±0.032	1.008±0.021	1.384±0.042	15.470±0.884	25.731±2.092
AI-DNN
	lipophilicity		rat oral LD50		flashpoint
seed	MAE	RMSE	MAE	RMSE	MAE	RMSE
2023	0.407168	0.544693	1.01618	1.34831	16.4871	25.7664
2024	0.380126	0.49631	0.988825	1.3926	17.6623	29.0129
2025	0.430191	0.613524	1.03588	1.47398	15.1403	24.8124
2026	0.387542	0.54033	1.04177	1.42217	16.3325	27.1144
2027	0.363149	0.483544	0.973503	1.3131	17.429	29.6429
2028	0.424489	0.558127	1.0452	1.4498	16.6047	27.0831
2029	0.405279	0.569791	1.03064	1.42523	16.2413	26.7692
2030	0.365274	0.487749	0.988952	1.3441	16.8916	28.5476
2031	0.412419	0.611918	1.04719	1.43302	15.0405	22.3186
2032	0.397086	0.525666	0.972044	1.33442	16.6203	26.0616
Overall	0.397±0.022	0.543±0.044	1.014±0.029	1.394±0.052	16.445±0.802	26.713±2.044
RF-based model
	lipophilicity		rat oral LD50		flashpoint
seed	MAE	RMSE	MAE	RMSE	MAE	RMSE
2023	0.62972	0.827995	1.01261	1.369	27.7102	40.934
2024	0.591353	0.804761	1.04821	1.4716	30.5392	43.0718
2025	0.59705	0.799098	1.01242	1.46199	27.0786	38.2297
2026	0.607714	0.793641	1.01952	1.41948	27.925	40.9328
2027	0.583427	0.782788	0.938782	1.24663	27.8713	40.502
2028	0.638615	0.833839	1.0434	1.47624	28.5643	42.0292
2029	0.611373	0.82278	1.01497	1.41051	28.4072	41.6484
2030	0.612952	0.804889	0.984848	1.35011	29.7542	43.5583
2031	0.631188	0.840244	1.02628	1.44547	28.033	39.9862
2032	0.611133	0.81584	1.00293	1.36961	27.044	38.7931
Overall	0.611±0.017	0.813±0.018	1.010±0.030	1.402±0.184	28.293±1.050	40.969±1.617
SVM-based model
	lipophilicity		rat oral LD50		flashpoint
seed	MAE	RMSE	MAE	RMSE	MAE	RMSE
2023	0.542349	0.729029	1.01935	1.36352	23.2365	34.9864
2024	0.530997	0.709288	1.00885	1.39019	24.6262	36.9674
2025	0.542331	0.723155	1.03946	1.46977	21.9463	32.6043
2026	0.553448	0.71998	1.02591	1.41396	22.9172	34.1623
2027	0.472669	0.622043	0.95964	1.28017	22.5861	33.3895
2028	0.558542	0.746333	1.04763	1.46038	22.6982	34.1293
2029	0.515171	0.706932	1.00403	1.36815	23.0542	36.0198
2030	0.51045	0.662809	0.974324	1.3154	22.7913	33.9671
2031	0.568433	0.761806	1.06356	1.45088	21.5634	31.4128
2032	0.557372	0.749128	1.0145	1.38601	21.7902	31.8084
Overall	0.535±0.027	0.713±0.040	1.016±0.030	1.390±0.059	22.721±0.829	33.945±1.664

## Sheet: Table S5
Table S5. The optimized hyperparameters of all variants of the 3D-MrDNN.
3D-MrDNN
Hyperparameters	Range	lipophilicity	rat oral LD50	flashpoint
Hidden size	[300,2400]	1800	1800	1700
Depth	[2,6]	4	4	4
Dropout	[0,0.4]	0.25	0.25	0.25
Number of layers	[1,3]	2	3	2
3D-MrDNN w/o BRICS
Hyperparameters	Range	lipophilicity	rat oral LD50	flashpoint
Hidden size	[300,2400]	1100	1600	1900
Depth	[2,6]	5	4	4
Dropout	[0,0.40]	0.2	0.25	0.25
Number of layers	[1,3]	1	2	2
3D-MrDNN w/o 3D
Hyperparameters	Range	lipophilicity	rat oral LD50	flashpoint
Hidden size	[300,2400]	2100	2300	600
Depth	[2,6]	2	2	6
Dropout	[0,0.40]	0.1	0.1	0.05
Number of layers	[1,3]	3	2	3
3D-MrDNN w/o all
Hyperparameters	Range	lipophilicity	rat oral LD50	flashpoint
Hidden size	[300,2400]	600	2300	600
Depth	[2,6]	6	2	3
Dropout	[0,0.40]	0	0.1	0.05
Number of layers	[1,3]	3	2	3
